# Supplementary material for: Transcriptomic analysis reveals distinct resistant response by physcion and chrysophanol against cucumber powdery mildew
Source: PeerJ journal article supplement (doi:10.7717/peerj.1991), 2016-05-17

a

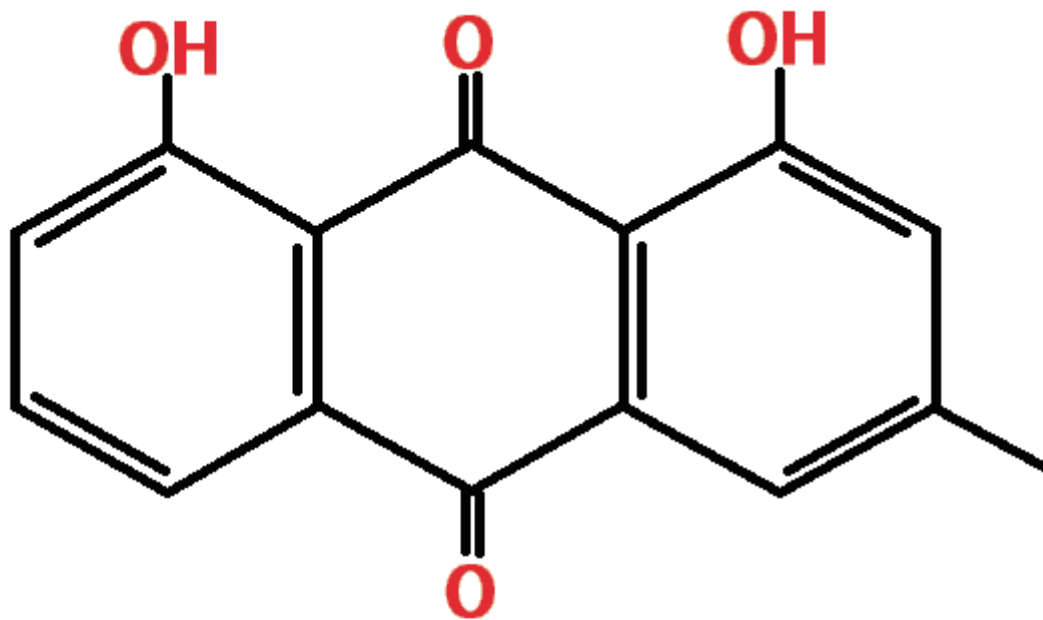

b

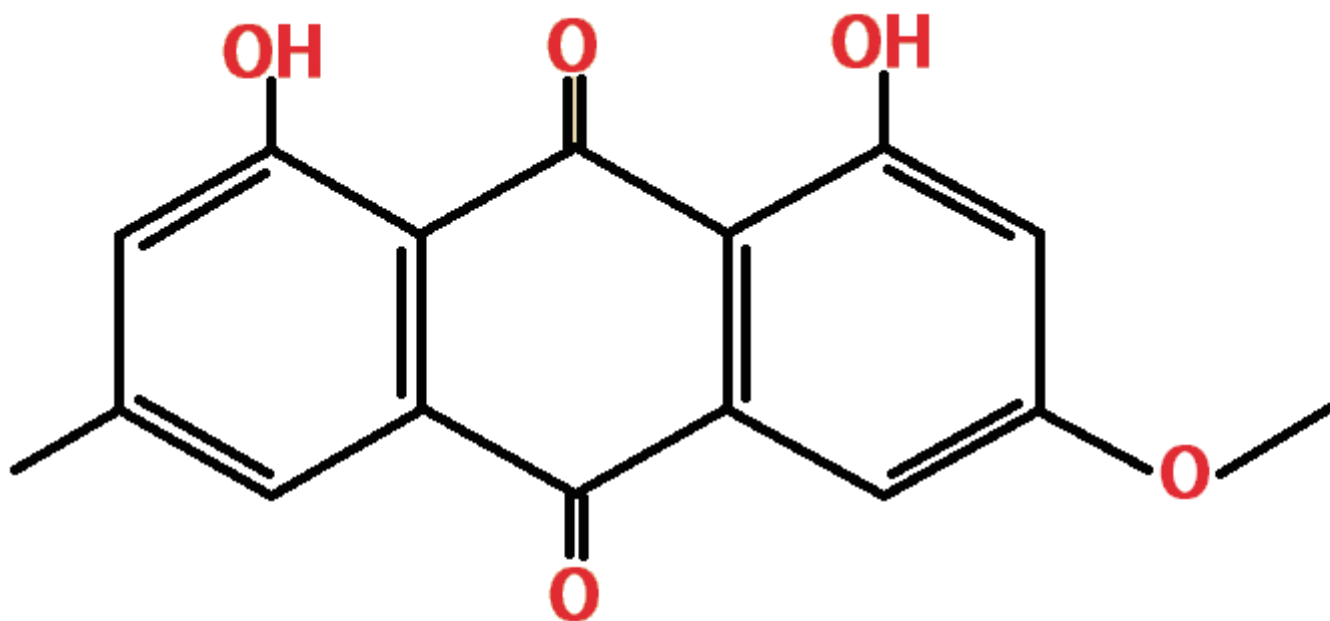

Supplement: Fig_S3.pdf [file Fig_S3.pdf]
