# Supplementary material for: Transcriptomic analysis reveals distinct resistant response by physcion and chrysophanol against cucumber powdery mildew
Source: PeerJ. 2016 May 17;4:e1991. doi: 10.7717/peerj.1991 (PMC4878370; doi:10.7717/peerj.1991)
Supplement: Table S1 [file peerj-04-1991-s004.xlsx]

## Sheet: Data Quality Summary
Supplementary Table 1 Data Quality Summary after illumine sequencing
Sample name	Raw reads	Clean reads	clean bases	Error rate(%)	Q20(%)	Q30(%)	GC content(%)
Con-2-1	8930651	8627741	0.86G	0.03	97.51	91.94	43.46
Con-2-2	8930651	8627741	0.86G	0.03	96.75	90.83	43.49
Con-3-1	8605628	8298218	0.83G	0.03	97.45	91.77	43.19
Con-3-2	8605628	8298218	0.83G	0.04	96.62	90.56	43.22
Chr-1-1	9515366	9181167	0.92G	0.03	97.47	91.88	43.34
Chr-1-2	9515366	9181167	0.92G	0.03	96.71	90.79	43.37
Chr-2-1	7663277	7446183	0.74G	0.03	97.54	92.02	43.02
Chr-2-2	7663277	7446183	0.74G	0.03	96.78	90.93	43.03
Phy-1-1	8941378	8642415	0.86G	0.03	97.52	91.94	43.43
Phy-1-2	8941378	8642415	0.86G	0.03	96.67	90.69	43.46
Phy-2-1	9336138	8970074	0.9G	0.03	97.43	91.76	43.6
Phy-2-2	9336138	8970074	0.9G	0.04	96.45	90.26	43.62
Phy-3-1	9076367	8798904	0.88G	0.03	97.51	91.95	43.42
Phy-3-2	9076367	8798904	0.88G	0.03	96.63	90.63	43.44
Phy×Chr-1-1	9731780	9440576	0.94G	0.03	97.38	91.56	43.47
Phy×Chr-1-2	9731780	9440576	0.94G	0.04	96.58	90.42	43.49
Phy×Chr-2-1	9726972	9435213	0.94G	0.03	97.46	91.82	43.48
Phy×Chr-2-2	9726972	9435213	0.94G	0.03	96.65	90.65	43.51
Phy×Chr-3-1	9199707	8927954	0.89G	0.03	97.45	91.75	43.49
Phy×Chr-3-2	9199707	8927954	0.89G	0.03	96.66	90.62	43.52
a-Q20: The percentage of bases with a Phred value > 20.
b-Q30: The percentage of bases with a Phred value > 30.
