# Supplementary material for: Transcriptomic analysis reveals distinct resistant response by physcion and chrysophanol against cucumber powdery mildew
Source: PeerJ. 2016 May 17;4:e1991. doi: 10.7717/peerj.1991 (PMC4878370; doi:10.7717/peerj.1991)
Supplement: Table S3 [file peerj-04-1991-s006.xlsx]

## Sheet: cor_pearson
Supplementary Table 2 Pearson correlation between samples
R^2	Con-2	Con-3	Chr-1	Chr-2	Phy-1	Phy-2	Phy-3	Phy×Chr-1	Phy×Chr-2	Phy×Chr-3
Con-2	1	0.941	0.917	0.904	0.938	0.947	0.956	0.803	0.813	0.802
Con-3	0.941	1	0.944	0.949	0.974	0.952	0.964	0.834	0.852	0.813
Chr-1	0.917	0.944	1	0.96	0.95	0.914	0.924	0.788	0.81	0.791
Chr-2	0.904	0.949	0.96	1	0.946	0.904	0.919	0.801	0.822	0.777
Phy-1	0.938	0.974	0.95	0.946	1	0.957	0.964	0.832	0.85	0.822
Phy-2	0.947	0.952	0.914	0.904	0.957	1	0.974	0.857	0.866	0.854
Phy-3	0.956	0.964	0.924	0.919	0.964	0.974	1	0.845	0.855	0.842
Phy×Chr-1	0.803	0.834	0.788	0.801	0.832	0.857	0.845	1	0.974	0.949
Phy×Chr-2	0.813	0.852	0.81	0.822	0.85	0.866	0.855	0.974	1	0.931
Phy×Chr-3	0.802	0.813	0.791	0.777	0.822	0.854	0.842	0.949	0.931	1
