# Supplementary material for: Transcriptomic analysis reveals distinct resistant response by physcion and chrysophanol against cucumber powdery mildew
Source: PeerJ. 2016 May 17;4:e1991. doi: 10.7717/peerj.1991 (PMC4878370; doi:10.7717/peerj.1991)
Supplement: Table S5 [file peerj-04-1991-s008.xlsx]

## Sheet: list
Supplementary Table 5 The gene list of Venn diagram analysis of DEGs

## Sheet: Chr vs Con.venn.xls
Gene ID	KEGG Description	KEGG url	Biological Process	Biological Process Description	Cellular Component	Cellular Component Description	Molecular Function	Molecular Function Description
Csa1G002110	putative calcium-binding protein CML19-like	http://www.genome.jp/dbget-bin/www_bget?csv:101215508	GO:0008150//GO:0008152//GO:0055114	biological_process//metabolic process//oxidation-reduction process	--	--	GO:0016491//GO:0046872//GO:0043169//GO:0005488//GO:0043167//GO:0003824//GO:0003674	oxidoreductase activity//metal ion binding//cation binding//binding//ion binding//catalytic activity//molecular_function
Csa1G002940	uncharacterized LOC101222072	http://www.genome.jp/dbget-bin/www_bget?csv:101222072	--	--	--	--	GO:0005488//GO:0005515//GO:0003674	binding//protein binding//molecular_function
Csa1G014400	enolase 1, chloroplastic-like; K01689 enolase [EC:4.2.1.11]	http://www.genome.jp/dbget-bin/www_bget?csv:101225817	GO:0008150//GO:0044238//GO:0006096//GO:0016052//GO:0006006//GO:0008152//GO:0009056//GO:0009987//GO:0006007//GO:0019320//GO:0006091//GO:0071704//GO:0005996//GO:0044237//GO:0019318//GO:0005975//GO:0046365	biological_process//primary metabolic process//glycolysis//carbohydrate catabolic process//glucose metabolic process//metabolic process//catabolic process//cellular process//glucose catabolic process//hexose catabolic process//generation of precursor metabolites and energy//organic substance metabolic process//monosaccharide metabolic process//cellular metabolic process//hexose metabolic process/…	GO:0044444//GO:0000015//GO:0043234//GO:0032991//GO:0044464//GO:0005737//GO:0044424//GO:0005623//GO:0005829//GO:0005622//GO:0044445//GO:0005575	cytoplasmic part//phosphopyruvate hydratase complex//protein complex//macromolecular complex//cell part//cytoplasm//intracellular part//cell//cytosol//intracellular//cytosolic part//cellular_component	GO:0043167//GO:0043169//GO:0005488//GO:0004634//GO:0003824//GO:0000287//GO:0046872//GO:0016836//GO:0016829//GO:0016835//GO:0003674	ion binding//cation binding//binding//phosphopyruvate hydratase activity//catalytic activity//magnesium ion binding//metal ion binding//hydro-lyase activity//lyase activity//carbon-oxygen lyase activity//molecular_function
Csa1G043300	uncharacterized LOC101212697	http://www.genome.jp/dbget-bin/www_bget?csv:101212697	--	--	--	--	GO:0003674//GO:0003824//GO:0016787	molecular_function//catalytic activity//hydrolase activity
Csa1G050360	malate synthase, glyoxysomal-like; K01638 malate synthase [EC:2.3.3.9]	http://www.genome.jp/dbget-bin/www_bget?csv:101214523	GO:0006725//GO:0008150//GO:0044238//GO:0019752//GO:0032787//GO:0043436//GO:0008152//GO:0044281//GO:0006081//GO:0009987//GO:0006082//GO:0071704//GO:0044237//GO:0044262//GO:0006097//GO:0046487//GO:0005975	cellular aromatic compound metabolic process//biological_process//primary metabolic process//carboxylic acid metabolic process//monocarboxylic acid metabolic process//oxoacid metabolic process//metabolic process//small molecule metabolic process//cellular aldehyde metabolic process//cellular process//organic acid metabolic process//organic substance metabolic process//cellular metabolic process//…	--	--	GO:0016830//GO:0003824//GO:0016740//GO:0004474//GO:0016829//GO:0016746//GO:0046912//GO:0003674	carbon-carbon lyase activity//catalytic activity//transferase activity//malate synthase activity//lyase activity//transferase activity, transferring acyl groups//transferase activity, transferring acyl groups, acyl groups converted into alkyl on transfer//molecular_function
Csa1G051720	bidirectional sugar transporter SWEET12-like; K15382 solute carrier family 50 (sugar transporter)	http://www.genome.jp/dbget-bin/www_bget?csv:101213156	GO:0051649//GO:0046907//GO:0016197//GO:0016192//GO:0051641//GO:0009987//GO:0051234//GO:0006810//GO:0042147//GO:0051179//GO:0008150	establishment of localization in cell//intracellular transport//endosome transport//vesicle-mediated transport//cellular localization//cellular process//establishment of localization//transport//retrograde transport, endosome to Golgi//localization//biological_process	GO:0005575//GO:0031224//GO:0044425//GO:0016021//GO:0016020	cellular_component//intrinsic to membrane//membrane part//integral to membrane//membrane	--	--
Csa1G075600	receptor-like protein kinase HSL1-like	http://www.genome.jp/dbget-bin/www_bget?csv:101213542	GO:0009987//GO:0016310//GO:0019538//GO:0044237//GO:0071704//GO:0044267//GO:0043170//GO:0006464//GO:0008150//GO:0043412//GO:0044238//GO:0006796//GO:0006793//GO:0008152//GO:0006468//GO:0044260	cellular process//phosphorylation//protein metabolic process//cellular metabolic process//organic substance metabolic process//cellular protein metabolic process//macromolecule metabolic process//protein modification process//biological_process//macromolecule modification//primary metabolic process//phosphate-containing compound metabolic process//phosphorus metabolic process//metabolic process//…	--	--	GO:0004672//GO:0005524//GO:0032559//GO:0005515//GO:0000166//GO:0032553//GO:0032550//GO:0003674//GO:0030554//GO:0097159//GO:0001882//GO:0043168//GO:0016301//GO:0017076//GO:0001883//GO:0032549//GO:0005488//GO:0043167//GO:0003824//GO:0016773//GO:0016740//GO:0032555//GO:0016772//GO:0035639	protein kinase activity//ATP binding//adenyl ribonucleotide binding//protein binding//nucleotide binding//ribonucleotide binding//purine ribonucleoside binding//molecular_function//adenyl nucleotide binding//organic cyclic compound binding//nucleoside binding//anion binding//kinase activity//purine nucleotide binding//purine nucleoside binding//ribonucleoside binding//binding//ion binding//cataly…
Csa1G085380	fasciclin-like arabinogalactan protein 11-like	http://www.genome.jp/dbget-bin/www_bget?csv:101212900	--	--	--	--	--	--
Csa1G168920	probable CCR4-associated factor 1 homolog 11-like; K12581 CCR4-NOT transcription complex subunit 7/8	http://www.genome.jp/dbget-bin/www_bget?csv:101210423	--	--	GO:0005622//GO:0005575//GO:0044424//GO:0005634//GO:0005623//GO:0044464//GO:0043226//GO:0043227//GO:0043229//GO:0043231	intracellular//cellular_component//intracellular part//nucleus//cell//cell part//organelle//membrane-bounded organelle//intracellular organelle//intracellular membrane-bounded organelle	--	--
Csa1G287000	--	--	--	--	--	--	--	--
Csa1G435760	probable 9-cis-epoxycarotenoid dioxygenase NCED5, chloroplastic-like; K09840 9-cis-epoxycarotenoid dioxygenase [EC:1.13.11.51]	http://www.genome.jp/dbget-bin/www_bget?csv:101204647	--	--	--	--	--	--
Csa1G481200	uncharacterized LOC101205924; K07195 exocyst complex component 7	http://www.genome.jp/dbget-bin/www_bget?csv:101205924	GO:0051641//GO:0006887//GO:0032940//GO:0006810//GO:0009987//GO:0051649//GO:0016192//GO:0046903//GO:0008150//GO:0051179//GO:0051234	cellular localization//exocytosis//secretion by cell//transport//cellular process//establishment of localization in cell//vesicle-mediated transport//secretion//biological_process//localization//establishment of localization	GO:0005622//GO:0005737//GO:0071944//GO:0044464//GO:0043234//GO:0000145//GO:0005623//GO:0044424//GO:0005575//GO:0005938//GO:0044448//GO:0032991//GO:0044444	intracellular//cytoplasm//cell periphery//cell part//protein complex//exocyst//cell//intracellular part//cellular_component//cell cortex//cell cortex part//macromolecular complex//cytoplasmic part	--	--
Csa1G505400	osmotin-like protein-like	http://www.genome.jp/dbget-bin/www_bget?csv:101217391	--	--	--	--	--	--
Csa1G529620	uncharacterized LOC101203517	http://www.genome.jp/dbget-bin/www_bget?csv:101203517	--	--	--	--	GO:0003674//GO:0005515//GO:0005488	molecular_function//protein binding//binding
Csa1G532300	probable protein phosphatase 2C 25-like; K17506 protein phosphatase 1L [EC:3.1.3.16]	http://www.genome.jp/dbget-bin/www_bget?csv:101217472	--	--	--	--	GO:0003824//GO:0003674	catalytic activity//molecular_function
Csa1G537320	phospholipase A1-Igamma2, chloroplastic-like	http://www.genome.jp/dbget-bin/www_bget?csv:101207640	GO:0008104//GO:0006643//GO:0044237//GO:0006644//GO:0046907//GO:0006664//GO:0006629//GO:0051641//GO:0015031//GO:0006810//GO:0006793//GO:0008152//GO:0045184//GO:0006796//GO:0033036//GO:0019637//GO:0044238//GO:0071704//GO:0070727//GO:0051649//GO:0009987//GO:0006650//GO:0046486//GO:0034613//GO:0006505//GO:0051234//GO:0006886//GO:0071702//GO:0008150//GO:0046488//GO:0051179//GO:0044255	protein localization//membrane lipid metabolic process//cellular metabolic process//phospholipid metabolic process//intracellular transport//glycolipid metabolic process//lipid metabolic process//cellular localization//protein transport//transport//phosphorus metabolic process//metabolic process//establishment of protein localization//phosphate-containing compound metabolic process//macromolecule…	GO:0005622//GO:0044425//GO:0044446//GO:0031227//GO:0044422//GO:0031090//GO:0042175//GO:0016021//GO:0012505//GO:0044464//GO:0043231//GO:0044432//GO:0043226//GO:0005737//GO:0005575//GO:0031224//GO:0031300//GO:0005623//GO:0044424//GO:0005783//GO:0016020//GO:0044444//GO:0005789//GO:0043229//GO:0043227	intracellular//membrane part//intracellular organelle part//intrinsic to endoplasmic reticulum membrane//organelle part//organelle membrane//nuclear outer membrane-endoplasmic reticulum membrane network//integral to membrane//endomembrane system//cell part//intracellular membrane-bounded organelle//endoplasmic reticulum part//organelle//cytoplasm//cellular_component//intrinsic to membrane//intrin…	GO:0016298//GO:0016787//GO:0003674//GO:0052689//GO:0004806//GO:0003824//GO:0016788	lipase activity//hydrolase activity//molecular_function//carboxylic ester hydrolase activity//triglyceride lipase activity//catalytic activity//hydrolase activity, acting on ester bonds
Csa1G589710	putative nuclease HARBI1-like	http://www.genome.jp/dbget-bin/www_bget?csv:101227810	GO:0071840//GO:0007010//GO:0006996//GO:0009987//GO:0016043//GO:0008150	cellular component organization or biogenesis//cytoskeleton organization//organelle organization//cellular process//cellular component organization//biological_process	--	--	GO:0008092//GO:0016787//GO:0005488//GO:0003779//GO:0005515//GO:0003674//GO:0003824//GO:0016788	cytoskeletal protein binding//hydrolase activity//binding//actin binding//protein binding//molecular_function//catalytic activity//hydrolase activity, acting on ester bonds
Csa1G614140	uncharacterized LOC101232773	http://www.genome.jp/dbget-bin/www_bget?csv:101232773	GO:0006810//GO:0008150//GO:0051179//GO:0051234	transport//biological_process//localization//establishment of localization	--	--	GO:0005488//GO:0097159//GO:0003676//GO:0003674	binding//organic cyclic compound binding//nucleic acid binding//molecular_function
Csa2G007990	calmodulin-like protein 4-like	http://www.genome.jp/dbget-bin/www_bget?csv:101217026	GO:0044238//GO:0090304//GO:0006974//GO:0006281//GO:0008152//GO:0023052//GO:0033554//GO:0034641//GO:0051716//GO:0050789//GO:0044237//GO:0006807//GO:0046483//GO:0006725//GO:0006139//GO:0008150//GO:0007154//GO:0050896//GO:0007165//GO:0006259//GO:0044260//GO:0065007//GO:0009987//GO:0043170//GO:0050794//GO:0006950//GO:0071704	primary metabolic process//nucleic acid metabolic process//response to DNA damage stimulus//DNA repair//metabolic process//signaling//cellular response to stress//cellular nitrogen compound metabolic process//cellular response to stimulus//regulation of biological process//cellular metabolic process//nitrogen compound metabolic process//heterocycle metabolic process//cellular aromatic compound me…	GO:0044421//GO:0031012//GO:0005578//GO:0005576//GO:0005575	extracellular region part//extracellular matrix//proteinaceous extracellular matrix//extracellular region//cellular_component	GO:0016787//GO:0016818//GO:0043167//GO:0032549//GO:0005488//GO:0035639//GO:0032555//GO:0003684//GO:0032559//GO:0017111//GO:0016462//GO:0043168//GO:0001882//GO:0097159//GO:0032550//GO:0000166//GO:0046872//GO:0003824//GO:0043169//GO:0001883//GO:0005509//GO:0004386//GO:0003677//GO:0003676//GO:0016817//GO:0005524//GO:0017076//GO:0030554//GO:0003674//GO:0032553	hydrolase activity//hydrolase activity, acting on acid anhydrides, in phosphorus-containing anhydrides//ion binding//ribonucleoside binding//binding//purine ribonucleoside triphosphate binding//purine ribonucleotide binding//damaged DNA binding//adenyl ribonucleotide binding//nucleoside-triphosphatase activity//pyrophosphatase activity//anion binding//nucleoside binding//organic cyclic compound b…
Csa2G012700	--	--	GO:0043170//GO:0071704//GO:0019538//GO:0009057//GO:0030163//GO:0008150//GO:0009056//GO:0008152//GO:0044238	macromolecule metabolic process//organic substance metabolic process//protein metabolic process//macromolecule catabolic process//protein catabolic process//biological_process//catabolic process//metabolic process//primary metabolic process	--	--	--	--
Csa2G070310	heat shock 70 kDa protein-like; K03283 heat shock 70kDa protein 1/8	http://www.genome.jp/dbget-bin/www_bget?csv:101215564	GO:0009987//GO:0016043//GO:0006461//GO:0005975//GO:0009653//GO:0071704//GO:0070271//GO:0008150//GO:0048869//GO:0032989//GO:0043933//GO:0007021//GO:0071840//GO:0000902//GO:0065003//GO:0043623//GO:0044085//GO:0048856//GO:0034622//GO:0071822//GO:0032502//GO:0044238//GO:0072668//GO:0022607//GO:0008152	cellular process//cellular component organization//protein complex assembly//carbohydrate metabolic process//anatomical structure morphogenesis//organic substance metabolic process//protein complex biogenesis//biological_process//cellular developmental process//cellular component morphogenesis//macromolecular complex subunit organization//tubulin complex assembly//cellular component organization …	GO:0005874//GO:0005623//GO:0044424//GO:0005575//GO:0043229//GO:0032991//GO:0043228//GO:0044422//GO:0005856//GO:0005622//GO:0043232//GO:0044446//GO:0043226//GO:0015630//GO:0044464//GO:0043234//GO:0044430	microtubule//cell//intracellular part//cellular_component//intracellular organelle//macromolecular complex//non-membrane-bounded organelle//organelle part//cytoskeleton//intracellular//intracellular non-membrane-bounded organelle//intracellular organelle part//organelle//microtubule cytoskeleton//cell part//protein complex//cytoskeletal part	GO:0005515//GO:0051082//GO:0003674//GO:0003824//GO:0016772//GO:0016787//GO:0016773//GO:0005488//GO:0016740	protein binding//unfolded protein binding//molecular_function//catalytic activity//transferase activity, transferring phosphorus-containing groups//hydrolase activity//phosphotransferase activity, alcohol group as acceptor//binding//transferase activity
Csa2G270210	uncharacterized LOC101218079	http://www.genome.jp/dbget-bin/www_bget?csv:101218079	--	--	--	--	--	--
Csa2G336130	glutathione S-transferase zeta class-like; K01800 maleylacetoacetate isomerase [EC:5.2.1.2]	http://www.genome.jp/dbget-bin/www_bget?csv:101212817	GO:0008152//GO:0055114//GO:0008150	metabolic process//oxidation-reduction process//biological_process	--	--	GO:0005488//GO:0016491//GO:0003824//GO:0003674//GO:0005515	binding//oxidoreductase activity//catalytic activity//molecular_function//protein binding
Csa2G371610	mitochondrial uncoupling protein 4-like; K15104 solute carrier family 25 (mitochondrial oxoglutarate transporter), member 11	http://www.genome.jp/dbget-bin/www_bget?csv:101203029	--	--	--	--	--	--
Csa2G377990	putative peptidyl-tRNA hydrolase PTRHD1-like	http://www.genome.jp/dbget-bin/www_bget?csv:101206751	--	--	--	--	GO:0016787//GO:0004045//GO:0003824//GO:0016788//GO:0003674//GO:0052689	hydrolase activity//aminoacyl-tRNA hydrolase activity//catalytic activity//hydrolase activity, acting on ester bonds//molecular_function//carboxylic ester hydrolase activity
Csa2G381800	uncharacterized LOC101232037	http://www.genome.jp/dbget-bin/www_bget?csv:101232037	--	--	--	--	--	--
Csa2G409500	GRX6; glutaredoxin-C9-like	http://www.genome.jp/dbget-bin/www_bget?csv:101206848	GO:0008150//GO:0065008//GO:0009987//GO:0019725//GO:0065007//GO:0050794//GO:0042592//GO:0045454//GO:0050789	biological_process//regulation of biological quality//cellular process//cellular homeostasis//biological regulation//regulation of cellular process//homeostatic process//cell redox homeostasis//regulation of biological process	--	--	GO:0003824//GO:0015035//GO:0009055//GO:0003674//GO:0016491//GO:0016667//GO:0015036	catalytic activity//protein disulfide oxidoreductase activity//electron carrier activity//molecular_function//oxidoreductase activity//oxidoreductase activity, acting on a sulfur group of donors//disulfide oxidoreductase activity
Csa3G047750	--	--	--	--	--	--	--	--
Csa3G119700	WRKY50; probable WRKY transcription factor 46-like	http://www.genome.jp/dbget-bin/www_bget?csv:101209522	GO:0019219//GO:0032774//GO:0009082//GO:0051252//GO:0006725//GO:0008150//GO:0006139//GO:0006807//GO:0019438//GO:0046483//GO:0010467//GO:0019222//GO:0019752//GO:0016053//GO:0044260//GO:0016070//GO:0044281//GO:0031323//GO:0009058//GO:0009987//GO:0044283//GO:2000112//GO:0034654//GO:0065007//GO:0071704//GO:0051171//GO:0006351//GO:0006355//GO:0043170//GO:0050794//GO:0010468//GO:0010556//GO:0031326//GO:…	regulation of nucleobase-containing compound metabolic process//RNA biosynthetic process//branched chain family amino acid biosynthetic process//regulation of RNA metabolic process//cellular aromatic compound metabolic process//biological_process//nucleobase-containing compound metabolic process//nitrogen compound metabolic process//aromatic compound biosynthetic process//heterocycle metabolic pr…	GO:0043227//GO:0043229//GO:0044424//GO:0005623//GO:0005575//GO:0044464//GO:0043226//GO:0043231//GO:0005634//GO:0005622	membrane-bounded organelle//intracellular organelle//intracellular part//cell//cellular_component//cell part//organelle//intracellular membrane-bounded organelle//nucleus//intracellular	GO:0003677//GO:0003676//GO:0003674//GO:0003700//GO:0005488//GO:0097159//GO:0043565//GO:0001071	DNA binding//nucleic acid binding//molecular_function//sequence-specific DNA binding transcription factor activity//binding//organic cyclic compound binding//sequence-specific DNA binding//nucleic acid binding transcription factor activity
Csa3G123180	BON1-associated protein 2-like	http://www.genome.jp/dbget-bin/www_bget?csv:101230022	--	--	--	--	GO:0005488//GO:0003674//GO:0005515	binding//molecular_function//protein binding
Csa3G133140	3-ketoacyl-CoA thiolase 2, peroxisomal-like; K07513 acetyl-CoA acyltransferase 1 [EC:2.3.1.16]	http://www.genome.jp/dbget-bin/www_bget?csv:101217710	GO:0006629//GO:0044238//GO:0008152//GO:0009058//GO:0008610//GO:0071704//GO:0008150	lipid metabolic process//primary metabolic process//metabolic process//biosynthetic process//lipid biosynthetic process//organic substance metabolic process//biological_process	--	--	GO:0016746//GO:0016740//GO:0016747//GO:0003674//GO:0003824	transferase activity, transferring acyl groups//transferase activity//transferase activity, transferring acyl groups other than amino-acyl groups//molecular_function//catalytic activity
Csa3G154400	uncharacterized LOC101230655	http://www.genome.jp/dbget-bin/www_bget?csv:101230655	--	--	--	--	--	--
Csa3G164460	uncharacterized LOC101206584	http://www.genome.jp/dbget-bin/www_bget?csv:101206584	--	--	GO:0016020//GO:0005575//GO:0031224//GO:0016021//GO:0044425	membrane//cellular_component//intrinsic to membrane//integral to membrane//membrane part	--	--
Csa3G164490	bifunctional epoxide hydrolase 2-like	http://www.genome.jp/dbget-bin/www_bget?csv:101226451	GO:0033015//GO:0044238//GO:0015994//GO:0008152//GO:0044270//GO:0042440//GO:0009056//GO:0034641//GO:0044248//GO:0006787//GO:0044237//GO:0033013//GO:0006725//GO:0008150//GO:0006807//GO:0046483//GO:0051187//GO:0051186//GO:0046700//GO:0019538//GO:0015996//GO:0006508//GO:0009987//GO:0007049//GO:0071704//GO:0006778//GO:0043170//GO:0046149//GO:0019439	tetrapyrrole catabolic process//primary metabolic process//chlorophyll metabolic process//metabolic process//cellular nitrogen compound catabolic process//pigment metabolic process//catabolic process//cellular nitrogen compound metabolic process//cellular catabolic process//porphyrin-containing compound catabolic process//cellular metabolic process//tetrapyrrole metabolic process//cellular aromat…	--	--	GO:0016787//GO:0070011//GO:0003824//GO:0016788//GO:0008236//GO:0047746//GO:0008233//GO:0052689//GO:0017171//GO:0003674	hydrolase activity//peptidase activity, acting on L-amino acid peptides//catalytic activity//hydrolase activity, acting on ester bonds//serine-type peptidase activity//chlorophyllase activity//peptidase activity//carboxylic ester hydrolase activity//serine hydrolase activity//molecular_function
Csa3G172920	peptidyl-prolyl cis-trans isomerase FKBP65-like; K09571 FK506-binding protein 4/5 [EC:5.2.1.8]	http://www.genome.jp/dbget-bin/www_bget?csv:101210041	GO:0008152//GO:0006457//GO:0044238//GO:0044267//GO:0044237//GO:0044260//GO:0008150//GO:0071704//GO:0043170//GO:0019538//GO:0009987	metabolic process//protein folding//primary metabolic process//cellular protein metabolic process//cellular metabolic process//cellular macromolecule metabolic process//biological_process//organic substance metabolic process//macromolecule metabolic process//protein metabolic process//cellular process	--	--	GO:0005488//GO:0003674//GO:0005515	binding//molecular_function//protein binding
Csa3G180260	dehydration-responsive element-binding protein 1C-like; K09286 EREBP-like factor	http://www.genome.jp/dbget-bin/www_bget?csv:101220749	GO:0080090//GO:0044249//GO:0008152//GO:0090304//GO:0044238//GO:0031326//GO:0010556//GO:0010468//GO:2001141//GO:0018130//GO:0060255//GO:0034645//GO:0044271//GO:0044237//GO:0050789//GO:0009059//GO:0034641//GO:0009889//GO:0016070//GO:0044260//GO:0046483//GO:0019438//GO:0010467//GO:0006807//GO:0019222//GO:0032774//GO:0019219//GO:0008150//GO:0006139//GO:0006725//GO:0051252//GO:0006355//GO:0050794//GO:…	regulation of primary metabolic process//cellular biosynthetic process//metabolic process//nucleic acid metabolic process//primary metabolic process//regulation of cellular biosynthetic process//regulation of macromolecule biosynthetic process//regulation of gene expression//regulation of RNA biosynthetic process//heterocycle biosynthetic process//regulation of macromolecule metabolic process//ce…	--	--	GO:0003700//GO:0001071//GO:0003674	sequence-specific DNA binding transcription factor activity//nucleic acid binding transcription factor activity//molecular_function
Csa3G239250	uncharacterized LOC101216427	http://www.genome.jp/dbget-bin/www_bget?csv:101216427	--	--	--	--	--	--
Csa3G308190	U-box domain-containing protein 21-like	http://www.genome.jp/dbget-bin/www_bget?csv:101220059	GO:0044267//GO:0044237//GO:0006464//GO:0043412//GO:0044238//GO:0008152//GO:0019538//GO:0009987//GO:0071704//GO:0016567//GO:0043170//GO:0008150//GO:0070647//GO:0044260//GO:0032446	cellular protein metabolic process//cellular metabolic process//protein modification process//macromolecule modification//primary metabolic process//metabolic process//protein metabolic process//cellular process//organic substance metabolic process//protein ubiquitination//macromolecule metabolic process//biological_process//protein modification by small protein conjugation or removal//cellular m…	GO:0000151//GO:0005622//GO:0044464//GO:0043234//GO:0005623//GO:0044424//GO:0005575//GO:0032991	ubiquitin ligase complex//intracellular//cell part//protein complex//cell//intracellular part//cellular_component//macromolecular complex	GO:0016881//GO:0004842//GO:0016879//GO:0003674//GO:0003824//GO:0019787//GO:0016874	acid-amino acid ligase activity//ubiquitin-protein ligase activity//ligase activity, forming carbon-nitrogen bonds//molecular_function//catalytic activity//small conjugating protein ligase activity//ligase activity
Csa3G319290	MLP-like protein 31-like	http://www.genome.jp/dbget-bin/www_bget?csv:101217999	GO:0006952//GO:0071103//GO:0034641//GO:0044237//GO:0044238//GO:0090304//GO:0008152//GO:0009987//GO:0006950//GO:0043170//GO:0071704//GO:0006807//GO:0046483//GO:0050896//GO:0006725//GO:0009607//GO:0006139//GO:0008150//GO:0006265//GO:0006259//GO:0044260	defense response//DNA conformation change//cellular nitrogen compound metabolic process//cellular metabolic process//primary metabolic process//nucleic acid metabolic process//metabolic process//cellular process//response to stress//macromolecule metabolic process//organic substance metabolic process//nitrogen compound metabolic process//heterocycle metabolic process//response to stimulus//cellul…	GO:0043232//GO:0005622//GO:0043226//GO:0044464//GO:0044424//GO:0005623//GO:0005575//GO:0043229//GO:0005694//GO:0043228	intracellular non-membrane-bounded organelle//intracellular//organelle//cell part//intracellular part//cell//cellular_component//intracellular organelle//chromosome//non-membrane-bounded organelle	GO:0016853//GO:0097159//GO:0005488//GO:0003674//GO:0003916//GO:0003824//GO:0003677//GO:0003676	isomerase activity//organic cyclic compound binding//binding//molecular_function//DNA topoisomerase activity//catalytic activity//DNA binding//nucleic acid binding
Csa3G331330	MLP-like protein 28-like	http://www.genome.jp/dbget-bin/www_bget?csv:101211373	GO:0006952//GO:0009607//GO:0008150//GO:0050896//GO:0006950	defense response//response to biotic stimulus//biological_process//response to stimulus//response to stress	--	--	--	--
Csa3G405510	chitin-inducible gibberellin-responsive protein 1-like	http://www.genome.jp/dbget-bin/www_bget?csv:101216606	--	--	--	--	--	--
Csa3G483770	uncharacterized LOC101222998	http://www.genome.jp/dbget-bin/www_bget?csv:101222998	--	--	--	--	--	--
Csa3G646530	GDSL esterase/lipase 1-like	http://www.genome.jp/dbget-bin/www_bget?csv:101227225	GO:0008150//GO:0071704//GO:0044238//GO:0008152//GO:0006629	biological_process//organic substance metabolic process//primary metabolic process//metabolic process//lipid metabolic process	--	--	GO:0003824//GO:0016788//GO:0003674//GO:0016787	catalytic activity//hydrolase activity, acting on ester bonds//molecular_function//hydrolase activity
Csa3G681150	serine carboxypeptidase-like 35-like; K16297 serine carboxypeptidase-like clade II [EC:3.4.16.-]	http://www.genome.jp/dbget-bin/www_bget?csv:101227448	GO:0008150//GO:0043170//GO:0071704//GO:0006508//GO:0019538//GO:0008152//GO:0044238	biological_process//macromolecule metabolic process//organic substance metabolic process//proteolysis//protein metabolic process//metabolic process//primary metabolic process	--	--	GO:0004180//GO:0008233//GO:0008236//GO:0003824//GO:0003674//GO:0017171//GO:0016787//GO:0008238//GO:0070008//GO:0004185//GO:0070011	carboxypeptidase activity//peptidase activity//serine-type peptidase activity//catalytic activity//molecular_function//serine hydrolase activity//hydrolase activity//exopeptidase activity//serine-type exopeptidase activity//serine-type carboxypeptidase activity//peptidase activity, acting on L-amino acid peptides
Csa3G706170	--	--	--	--	--	--	--	--
Csa3G730770	uncharacterized LOC101205174	http://www.genome.jp/dbget-bin/www_bget?csv:101205174	GO:0008150//GO:0008152	biological_process//metabolic process	--	--	GO:0003674//GO:0016741//GO:0003824//GO:0008168//GO:0016740	molecular_function//transferase activity, transferring one-carbon groups//catalytic activity//methyltransferase activity//transferase activity
Csa3G748780	uncharacterized LOC101207081	http://www.genome.jp/dbget-bin/www_bget?csv:101207081	--	--	--	--	--	--
Csa3G779010	putative syntaxin-24-like	http://www.genome.jp/dbget-bin/www_bget?csv:101227985	--	--	--	--	--	--
Csa3G782680	syntaxin-121-like; K08486 syntaxin 1B/2/3	http://www.genome.jp/dbget-bin/www_bget?csv:101208931	GO:0006298//GO:0034641//GO:0051641//GO:0023052//GO:0055085//GO:0055086//GO:0033554//GO:0044403//GO:0051704//GO:0050789//GO:0044003//GO:0090407//GO:0051716//GO:0044237//GO:0034220//GO:0019048//GO:0046907//GO:0044271//GO:0042455//GO:0009205//GO:0019054//GO:0006754//GO:0018130//GO:0048193//GO:0006974//GO:0006164//GO:0009117//GO:0009201//GO:0019637//GO:0051817//GO:0044238//GO:0090304//GO:0009141//GO:…	mismatch repair//cellular nitrogen compound metabolic process//cellular localization//signaling//transmembrane transport//nucleobase-containing small molecule metabolic process//cellular response to stress//symbiosis, encompassing mutualism through parasitism//multi-organism process//regulation of biological process//modification by symbiont of host morphology or physiology//organophosphate biosy…	GO:0019866//GO:0005743//GO:0031975//GO:0016021//GO:0031090//GO:0044455//GO:0019028//GO:0044425//GO:0033177//GO:0005622//GO:0044446//GO:0044422//GO:0044464//GO:0043234//GO:0043231//GO:0044423//GO:0031966//GO:0005737//GO:0043226//GO:0005739//GO:0005623//GO:0044424//GO:0005740//GO:0045263//GO:0019012//GO:0031224//GO:0005575//GO:0016469//GO:0016020//GO:0005753//GO:0032991//GO:0000276//GO:0044444//GO:…	organelle inner membrane//mitochondrial inner membrane//envelope//integral to membrane//organelle membrane//mitochondrial membrane part//viral capsid//membrane part//proton-transporting two-sector ATPase complex, proton-transporting domain//intracellular//intracellular organelle part//organelle part//cell part//protein complex//intracellular membrane-bounded organelle//virion part//mitochondrial …	GO:0043566//GO:0015078//GO:0032559//GO:0032550//GO:0022890//GO:0001882//GO:0097159//GO:0000166//GO:0043168//GO:0005215//GO:0032549//GO:0005488//GO:0022891//GO:0043167//GO:0015075//GO:0003690//GO:0035639//GO:0032555//GO:0060089//GO:0051082//GO:0030983//GO:0005524//GO:0022892//GO:0005515//GO:0032553//GO:0030554//GO:0003674//GO:0015077//GO:0004871//GO:0017076//GO:0001883//GO:0003676//GO:0003677//GO:…	structure-specific DNA binding//hydrogen ion transmembrane transporter activity//adenyl ribonucleotide binding//purine ribonucleoside binding//inorganic cation transmembrane transporter activity//nucleoside binding//organic cyclic compound binding//nucleotide binding//anion binding//transporter activity//ribonucleoside binding//binding//substrate-specific transmembrane transporter activity//ion b…
Csa3G784360	uncharacterized LOC101225028	http://www.genome.jp/dbget-bin/www_bget?csv:101225028	GO:0015694//GO:0006811//GO:0051234//GO:0010035//GO:0072511//GO:0046689//GO:0008150//GO:0050896//GO:0051179//GO:0009636//GO:0030001//GO:0006810//GO:0010038//GO:0006812//GO:0050787//GO:0042221//GO:0000041	mercury ion transport//ion transport//establishment of localization//response to inorganic substance//divalent inorganic cation transport//response to mercury ion//biological_process//response to stimulus//localization//response to toxin//metal ion transport//transport//response to metal ion//cation transport//detoxification of mercury ion//response to chemical stimulus//transition metal ion tran…	GO:0005575//GO:0016020	cellular_component//membrane	GO:0003674//GO:0046915//GO:0022892//GO:0046873//GO:0008324//GO:0022857//GO:0015097//GO:0022890//GO:0072509//GO:0005215//GO:0022891//GO:0015075	molecular_function//transition metal ion transmembrane transporter activity//substrate-specific transporter activity//metal ion transmembrane transporter activity//cation transmembrane transporter activity//transmembrane transporter activity//mercury ion transmembrane transporter activity//inorganic cation transmembrane transporter activity//divalent inorganic cation transmembrane transporter act…
Csa3G820500	vacuolar amino acid transporter 1-like; K15015 solute carrier family 32 (vesicular inhibitory amino acid transporter)	http://www.genome.jp/dbget-bin/www_bget?csv:101230198	GO:0032502//GO:0009847//GO:0008150	developmental process//spore germination//biological_process	GO:0044425//GO:0016021//GO:0031224//GO:0005575//GO:0016020	membrane part//integral to membrane//intrinsic to membrane//cellular_component//membrane	--	--
Csa3G827220	--	--	--	--	GO:0016020//GO:0005575	membrane//cellular_component	GO:0016503//GO:0060089//GO:0003674//GO:0004871//GO:0038023//GO:0004872//GO:0004888//GO:0004932//GO:0004930	pheromone receptor activity//molecular transducer activity//molecular_function//signal transducer activity//signaling receptor activity//receptor activity//transmembrane signaling receptor activity//mating-type factor pheromone receptor activity//G-protein coupled receptor activity
Csa3G837040	--	--	GO:0044271//GO:0034645//GO:0044237//GO:0050789//GO:0009059//GO:0034641//GO:0009889//GO:0080090//GO:0044249//GO:0008152//GO:0090304//GO:0044238//GO:0010468//GO:0031326//GO:0010556//GO:0060255//GO:0018130//GO:2001141//GO:0006355//GO:0043170//GO:0050794//GO:0071704//GO:0051171//GO:0006351//GO:0065007//GO:0009058//GO:0031323//GO:0009987//GO:0034654//GO:2000112//GO:0016070//GO:0044260//GO:0006352//GO:…	cellular nitrogen compound biosynthetic process//cellular macromolecule biosynthetic process//cellular metabolic process//regulation of biological process//macromolecule biosynthetic process//cellular nitrogen compound metabolic process//regulation of biosynthetic process//regulation of primary metabolic process//cellular biosynthetic process//metabolic process//nucleic acid metabolic process//pr…	GO:0044422//GO:0044446//GO:0043232//GO:0005622//GO:0005634//GO:0043226//GO:0000775//GO:0043231//GO:0044464//GO:0005575//GO:0044427//GO:0044424//GO:0005623//GO:0005694//GO:0043228//GO:0043227//GO:0043229	organelle part//intracellular organelle part//intracellular non-membrane-bounded organelle//intracellular//nucleus//organelle//chromosome, centromeric region//intracellular membrane-bounded organelle//cell part//cellular_component//chromosomal part//intracellular part//cell//chromosome//non-membrane-bounded organelle//membrane-bounded organelle//intracellular organelle	GO:0001071//GO:0097159//GO:0016987//GO:0000988//GO:0003700//GO:0005488//GO:0003682//GO:0003674//GO:0000990//GO:0000996//GO:0003677//GO:0003676	nucleic acid binding transcription factor activity//organic cyclic compound binding//sigma factor activity//protein binding transcription factor activity//sequence-specific DNA binding transcription factor activity//binding//chromatin binding//molecular_function//core RNA polymerase binding transcription factor activity//core DNA-dependent RNA polymerase binding promoter specificity activity//DNA…
Csa3G872170	snakin-2-like	http://www.genome.jp/dbget-bin/www_bget?csv:101231751	--	--	--	--	--	--
Csa3G889770	uncharacterized LOC101211963	http://www.genome.jp/dbget-bin/www_bget?csv:101211963	--	--	--	--	--	--
Csa3G912910	expansin-like B1-like	http://www.genome.jp/dbget-bin/www_bget?csv:101215548	--	--	--	--	--	--
Csa3G914020	uncharacterized LOC101214826	http://www.genome.jp/dbget-bin/www_bget?csv:101214826	--	--	--	--	--	--
Csa3G914030	uncharacterized LOC101214579	http://www.genome.jp/dbget-bin/www_bget?csv:101214579	GO:0033036//GO:0051641//GO:0045185//GO:0070972//GO:0051235//GO:0008104//GO:0006621//GO:0051651//GO:0051179//GO:0008150//GO:0072595//GO:0065008//GO:0035437//GO:0034613//GO:0033365//GO:0065007//GO:0009987//GO:0032507//GO:0070727	macromolecule localization//cellular localization//maintenance of protein location//protein localization in endoplasmic reticulum//maintenance of location//protein localization//protein retention in ER lumen//maintenance of location in cell//localization//biological_process//maintenance of protein localization to organelle//regulation of biological quality//maintenance of protein localization in …	GO:0043226//GO:0043231//GO:0044464//GO:0016021//GO:0005634//GO:0044425//GO:0005622//GO:0043227//GO:0043229//GO:0016020//GO:0044424//GO:0005623//GO:0005575//GO:0031224	organelle//intracellular membrane-bounded organelle//cell part//integral to membrane//nucleus//membrane part//intracellular//membrane-bounded organelle//intracellular organelle//membrane//intracellular part//cell//cellular_component//intrinsic to membrane	GO:0033218//GO:0005488//GO:0005048//GO:0046923//GO:0042277//GO:0003674	amide binding//binding//signal sequence binding//ER retention sequence binding//peptide binding//molecular_function
Csa4G001950	Sus1; sucrose synthase 2-like; K00695 sucrose synthase [EC:2.4.1.13]	http://www.genome.jp/dbget-bin/www_bget?csv:101203847	GO:0044237//GO:0005984//GO:0009311//GO:0005985//GO:0008152//GO:0044238//GO:0071704//GO:0044262//GO:0005975//GO:0009058//GO:0009987//GO:0008150	cellular metabolic process//disaccharide metabolic process//oligosaccharide metabolic process//sucrose metabolic process//metabolic process//primary metabolic process//organic substance metabolic process//cellular carbohydrate metabolic process//carbohydrate metabolic process//biosynthetic process//cellular process//biological_process	--	--	--	--
Csa4G004860	protein UNUSUAL FLORAL ORGANS-like	http://www.genome.jp/dbget-bin/www_bget?csv:101226730	--	--	--	--	GO:0005488//GO:0003674//GO:0005515	binding//molecular_function//protein binding
Csa4G005000	26.5 kDa heat shock protein, mitochondrial-like; K13993 HSP20 family protein	http://www.genome.jp/dbget-bin/www_bget?csv:101210969	--	--	--	--	--	--
Csa4G045040	probable dehydrin LEA-like	http://www.genome.jp/dbget-bin/www_bget?csv:101226250	GO:0042221//GO:0009415//GO:0010035//GO:0050896//GO:0008150//GO:0009628//GO:0006950	response to chemical stimulus//response to water//response to inorganic substance//response to stimulus//biological_process//response to abiotic stimulus//response to stress	--	--	--	--
Csa4G056600	abscisic acid 8'-hydroxylase 1-like; K09843 (+)-abscisic acid 8'-hydroxylase [EC:1.14.13.93]	http://www.genome.jp/dbget-bin/www_bget?csv:101212508	GO:0055114//GO:0008150//GO:0008152	oxidation-reduction process//biological_process//metabolic process	--	--	GO:0009055//GO:0046906//GO:0016705//GO:0046872//GO:0043169//GO:0003824//GO:0003674//GO:0016491//GO:0020037//GO:0005488//GO:0043167//GO:0005506//GO:0097159//GO:0046914	electron carrier activity//tetrapyrrole binding//oxidoreductase activity, acting on paired donors, with incorporation or reduction of molecular oxygen//metal ion binding//cation binding//catalytic activity//molecular_function//oxidoreductase activity//heme binding//binding//ion binding//iron ion binding//organic cyclic compound binding//transition metal ion binding
Csa4G214830	protein EARLY RESPONSIVE TO DEHYDRATION 15-like	http://www.genome.jp/dbget-bin/www_bget?csv:101213704	--	--	--	--	--	--
Csa4G242890	--	--	--	--	--	--	--	--
Csa4G303690	probable glutathione S-transferase-like; K00799 glutathione S-transferase [EC:2.5.1.18]	http://www.genome.jp/dbget-bin/www_bget?csv:101231765	--	--	--	--	GO:0005488//GO:0005515//GO:0003674	binding//protein binding//molecular_function
Csa4G326550	alanine--glyoxylate aminotransferase 2 homolog 2, mitochondrial-like; K00827 alanine-glyoxylate transaminase / (R)-3-amino-2-methylpropionate-pyruvate transaminase [EC:2.6.1.44 2.6.1.40]	http://www.genome.jp/dbget-bin/www_bget?csv:101210304	--	--	--	--	GO:0003824//GO:0030170//GO:0008483//GO:0048037//GO:0003674//GO:0043167//GO:0005488//GO:0016769//GO:0016740//GO:0043168	catalytic activity//pyridoxal phosphate binding//transaminase activity//cofactor binding//molecular_function//ion binding//binding//transferase activity, transferring nitrogenous groups//transferase activity//anion binding
Csa4G378260	uncharacterized LOC101231035	http://www.genome.jp/dbget-bin/www_bget?csv:101231035	--	--	--	--	GO:0003674//GO:0005515//GO:0005488	molecular_function//protein binding//binding
Csa4G608130	protein ASPARTIC PROTEASE IN GUARD CELL 1-like	http://www.genome.jp/dbget-bin/www_bget?csv:101224877	GO:0008152//GO:0044238//GO:0008150//GO:0043170//GO:0071704//GO:0006508//GO:0019538	metabolic process//primary metabolic process//biological_process//macromolecule metabolic process//organic substance metabolic process//proteolysis//protein metabolic process	--	--	GO:0016787//GO:0004175//GO:0004190//GO:0070011//GO:0008233//GO:0003824//GO:0070001//GO:0003674	hydrolase activity//endopeptidase activity//aspartic-type endopeptidase activity//peptidase activity, acting on L-amino acid peptides//peptidase activity//catalytic activity//aspartic-type peptidase activity//molecular_function
Csa4G629470	probable aminotransferase TAT2-like; K00815 tyrosine aminotransferase [EC:2.6.1.5]	http://www.genome.jp/dbget-bin/www_bget?csv:101231189	GO:0071704//GO:0005975//GO:0009058//GO:0009987//GO:0019752//GO:0044281//GO:0008150//GO:0006807//GO:0044237//GO:0006520//GO:0006082//GO:0008152//GO:0043436//GO:0044238	organic substance metabolic process//carbohydrate metabolic process//biosynthetic process//cellular process//carboxylic acid metabolic process//small molecule metabolic process//biological_process//nitrogen compound metabolic process//cellular metabolic process//cellular amino acid metabolic process//organic acid metabolic process//metabolic process//oxoacid metabolic process//primary metabolic p…	--	--	GO:0048037//GO:0003674//GO:0030170//GO:0008483//GO:0004553//GO:0003824//GO:0043168//GO:0016829//GO:0016798//GO:0016769//GO:0016740//GO:0043167//GO:0005488//GO:0016787	cofactor binding//molecular_function//pyridoxal phosphate binding//transaminase activity//hydrolase activity, hydrolyzing O-glycosyl compounds//catalytic activity//anion binding//lyase activity//hydrolase activity, acting on glycosyl bonds//transferase activity, transferring nitrogenous groups//transferase activity//ion binding//binding//hydrolase activity
Csa4G630010	ethylene-responsive transcription factor 4-like	http://www.genome.jp/dbget-bin/www_bget?csv:101227671	GO:0032774//GO:0019219//GO:0008150//GO:0006139//GO:0051252//GO:0006725//GO:0046483//GO:0019438//GO:0010467//GO:0006807//GO:0019222//GO:0016070//GO:0044260//GO:0009987//GO:0031323//GO:0009058//GO:2000112//GO:0034654//GO:0065007//GO:0006351//GO:0051171//GO:0071704//GO:0006355//GO:0050794//GO:0043170//GO:0010556//GO:0031326//GO:0010468//GO:2001141//GO:0018130//GO:0060255//GO:0044238//GO:0090304//GO:…	RNA biosynthetic process//regulation of nucleobase-containing compound metabolic process//biological_process//nucleobase-containing compound metabolic process//regulation of RNA metabolic process//cellular aromatic compound metabolic process//heterocycle metabolic process//aromatic compound biosynthetic process//gene expression//nitrogen compound metabolic process//regulation of metabolic process…	--	--	GO:0003674//GO:0003700//GO:0001071	molecular_function//sequence-specific DNA binding transcription factor activity//nucleic acid binding transcription factor activity
Csa4G638320	stem-specific protein TSJT1-like	http://www.genome.jp/dbget-bin/www_bget?csv:101207830	--	--	GO:0005576//GO:0005575	extracellular region//cellular_component	GO:0004859//GO:0030234//GO:0055102//GO:0004857//GO:0003674	phospholipase inhibitor activity//enzyme regulator activity//lipase inhibitor activity//enzyme inhibitor activity//molecular_function
Csa4G638480	probable disease resistance protein At4g33300-like	http://www.genome.jp/dbget-bin/www_bget?csv:101225842	--	--	--	--	GO:0017111//GO:0032559//GO:0043168//GO:0016462//GO:0000166//GO:0032550//GO:0097159//GO:0001882//GO:0016787//GO:0043531//GO:0032549//GO:0005488//GO:0043167//GO:0016818//GO:0032555//GO:0017076//GO:0030554//GO:0003674//GO:0032553//GO:0001883//GO:0003824//GO:0016817//GO:0004386	nucleoside-triphosphatase activity//adenyl ribonucleotide binding//anion binding//pyrophosphatase activity//nucleotide binding//purine ribonucleoside binding//organic cyclic compound binding//nucleoside binding//hydrolase activity//ADP binding//ribonucleoside binding//binding//ion binding//hydrolase activity, acting on acid anhydrides, in phosphorus-containing anhydrides//purine ribonucleotide bi…
Csa4G641690	transcription factor MYB44-like; K09422 myb proto-oncogene protein, plant	http://www.genome.jp/dbget-bin/www_bget?csv:101218543	--	--	--	--	GO:0005488//GO:0097159//GO:0003677//GO:0003676//GO:0003674	binding//organic cyclic compound binding//DNA binding//nucleic acid binding//molecular_function
Csa4G642460	zinc finger protein ZAT10-like	http://www.genome.jp/dbget-bin/www_bget?csv:101221218	GO:0008152//GO:0006396//GO:0080090//GO:0006366//GO:0044249//GO:0010556//GO:0031326//GO:0010468//GO:2001141//GO:0018130//GO:0060255//GO:0044238//GO:0090304//GO:0044237//GO:0050789//GO:0034645//GO:0044271//GO:0034641//GO:0009889//GO:0009059//GO:0016071//GO:0016070//GO:0044260//GO:0032774//GO:0006397//GO:0019219//GO:0008150//GO:0006139//GO:0051252//GO:0006725//GO:0046483//GO:0019438//GO:0006357//GO:…	metabolic process//RNA processing//regulation of primary metabolic process//transcription from RNA polymerase II promoter//cellular biosynthetic process//regulation of macromolecule biosynthetic process//regulation of cellular biosynthetic process//regulation of gene expression//regulation of RNA biosynthetic process//heterocycle biosynthetic process//regulation of macromolecule metabolic process…	GO:0044428//GO:0043234//GO:0044464//GO:0070013//GO:0005654//GO:0005737//GO:0043233//GO:0043226//GO:0031981//GO:0043231//GO:0044446//GO:0016592//GO:0005622//GO:0044422//GO:0005634//GO:0032991//GO:0043227//GO:0043229//GO:0005575//GO:0044424//GO:0005623//GO:0044451//GO:0031974	nuclear part//protein complex//cell part//intracellular organelle lumen//nucleoplasm//cytoplasm//organelle lumen//organelle//nuclear lumen//intracellular membrane-bounded organelle//intracellular organelle part//mediator complex//intracellular//organelle part//nucleus//macromolecular complex//membrane-bounded organelle//intracellular organelle//cellular_component//intracellular part//cell//nucleo…	GO:0000989//GO:0005488//GO:0043167//GO:0000988//GO:0001076//GO:0008270//GO:0097159//GO:0046914//GO:0003723//GO:0003676//GO:0001104//GO:0043169//GO:0003712//GO:0046872//GO:0003674	transcription factor binding transcription factor activity//binding//ion binding//protein binding transcription factor activity//RNA polymerase II transcription factor binding transcription factor activity//zinc ion binding//organic cyclic compound binding//transition metal ion binding//RNA binding//nucleic acid binding//RNA polymerase II transcription cofactor activity//cation binding//transcrip…
Csa5G157310	geraniol 8-hydroxylase-like	http://www.genome.jp/dbget-bin/www_bget?csv:101226016	GO:0044271//GO:0044237//GO:0090407//GO:0051301//GO:0046496//GO:0055086//GO:0034641//GO:0009165//GO:0044249//GO:0006796//GO:0008152//GO:0006793//GO:0009108//GO:0044238//GO:0019637//GO:0009117//GO:0018130//GO:0006753//GO:0071704//GO:0019363//GO:0007049//GO:0019362//GO:0009058//GO:0009987//GO:0072525//GO:0034654//GO:0051186//GO:0007059//GO:0006733//GO:0019674//GO:0044281//GO:0019359//GO:0055114//GO:…	cellular nitrogen compound biosynthetic process//cellular metabolic process//organophosphate biosynthetic process//cell division//nicotinamide nucleotide metabolic process//nucleobase-containing small molecule metabolic process//cellular nitrogen compound metabolic process//nucleotide biosynthetic process//cellular biosynthetic process//phosphate-containing compound metabolic process//metabolic p…	GO:0044425//GO:0016021//GO:0031224//GO:0005575//GO:0016020	membrane part//integral to membrane//intrinsic to membrane//cellular_component//membrane	GO:0043168//GO:0000166//GO:0001882//GO:0097159//GO:0005506//GO:0032550//GO:0046914//GO:0032559//GO:0035639//GO:0032555//GO:0016491//GO:0020037//GO:0043167//GO:0005488//GO:0032549//GO:0017076//GO:0030554//GO:0003674//GO:0032553//GO:0005524//GO:0008987//GO:0003677//GO:0003676//GO:0009055//GO:0046906//GO:0046872//GO:0016705//GO:0001883//GO:0043169//GO:0003824	anion binding//nucleotide binding//nucleoside binding//organic cyclic compound binding//iron ion binding//purine ribonucleoside binding//transition metal ion binding//adenyl ribonucleotide binding//purine ribonucleoside triphosphate binding//purine ribonucleotide binding//oxidoreductase activity//heme binding//ion binding//binding//ribonucleoside binding//purine nucleotide binding//adenyl nucleot…
Csa5G160170	vacuolar-processing enzyme-like; K01369 legumain [EC:3.4.22.34]	http://www.genome.jp/dbget-bin/www_bget?csv:101221167	GO:0044238//GO:0008152//GO:0008150//GO:0019538//GO:0006508//GO:0043170//GO:0071704	primary metabolic process//metabolic process//biological_process//protein metabolic process//proteolysis//macromolecule metabolic process//organic substance metabolic process	--	--	GO:0016787//GO:0004175//GO:0070011//GO:0004197//GO:0003824//GO:0008233//GO:0008234//GO:0003674	hydrolase activity//endopeptidase activity//peptidase activity, acting on L-amino acid peptides//cysteine-type endopeptidase activity//catalytic activity//peptidase activity//cysteine-type peptidase activity//molecular_function
Csa5G174560	BAG family molecular chaperone regulator 3-like	http://www.genome.jp/dbget-bin/www_bget?csv:101207502	--	--	--	--	GO:0051087//GO:0003674//GO:0005515//GO:0005488	chaperone binding//molecular_function//protein binding//binding
Csa5G174570	dehydration-responsive element-binding protein 1D-like	http://www.genome.jp/dbget-bin/www_bget?csv:101207745	GO:0051171//GO:0071704//GO:0006351//GO:0006355//GO:0043170//GO:0050794//GO:0031323//GO:0009058//GO:0009987//GO:0034654//GO:2000112//GO:0065007//GO:0044260//GO:0016070//GO:0019219//GO:0032774//GO:0006725//GO:0051252//GO:0008150//GO:0006139//GO:0006807//GO:0019438//GO:0046483//GO:0010467//GO:0019222//GO:0044237//GO:0050789//GO:0034645//GO:0044271//GO:0034641//GO:0009889//GO:0009059//GO:0008152//GO:…	regulation of nitrogen compound metabolic process//organic substance metabolic process//transcription, DNA-dependent//regulation of transcription, DNA-dependent//macromolecule metabolic process//regulation of cellular process//regulation of cellular metabolic process//biosynthetic process//cellular process//nucleobase-containing compound biosynthetic process//regulation of cellular macromolecule …	--	--	GO:0003674//GO:0001071//GO:0003700	molecular_function//nucleic acid binding transcription factor activity//sequence-specific DNA binding transcription factor activity
Csa5G198230	lachrymatory-factor synthase-like	http://www.genome.jp/dbget-bin/www_bget?csv:101212825	GO:0006950//GO:0008150//GO:0050896	response to stress//biological_process//response to stimulus	--	--	--	--
Csa5G241640	probable S-adenosylmethionine-dependent methyltransferase At5g38100-like	http://www.genome.jp/dbget-bin/www_bget?csv:101216096	--	--	--	--	GO:0008168//GO:0016740//GO:0003674//GO:0016741//GO:0003824	methyltransferase activity//transferase activity//molecular_function//transferase activity, transferring one-carbon groups//catalytic activity
Csa5G322500	Sus4; sucrose synthase 5-like; K00695 sucrose synthase [EC:2.4.1.13]	http://www.genome.jp/dbget-bin/www_bget?csv:101211461	GO:0043068//GO:0012502//GO:0043065//GO:0044237//GO:0050789//GO:0044238//GO:0048518//GO:0012501//GO:0042981//GO:0016265//GO:0009311//GO:0005984//GO:0008152//GO:0005985//GO:0065007//GO:0009058//GO:0009987//GO:0010942//GO:0005975//GO:0050794//GO:0071704//GO:0006917//GO:0044262//GO:0048522//GO:0010941//GO:0008150//GO:0008219//GO:0006915//GO:0043067	positive regulation of programmed cell death//induction of programmed cell death//positive regulation of apoptosis//cellular metabolic process//regulation of biological process//primary metabolic process//positive regulation of biological process//programmed cell death//regulation of apoptosis//death//oligosaccharide metabolic process//disaccharide metabolic process//metabolic process//sucrose me…	--	--	--	--
Csa5G524840	uncharacterized LOC101205581	http://www.genome.jp/dbget-bin/www_bget?csv:101205581	GO:0008150//GO:0051179//GO:0006807//GO:0016053//GO:0051234//GO:0019752//GO:0044281//GO:0044283//GO:0009058//GO:0009987//GO:0065007//GO:0071704//GO:0006811//GO:0051049//GO:0032879//GO:0044238//GO:0043269//GO:0006810//GO:0008152//GO:0043436//GO:0006820//GO:0044249//GO:0008652//GO:0006082//GO:0046394//GO:0044070//GO:0055085//GO:0050789//GO:0044237//GO:0006520	biological_process//localization//nitrogen compound metabolic process//organic acid biosynthetic process//establishment of localization//carboxylic acid metabolic process//small molecule metabolic process//small molecule biosynthetic process//biosynthetic process//cellular process//biological regulation//organic substance metabolic process//ion transport//regulation of transport//regulation of lo…	GO:0016020//GO:0044444//GO:0043229//GO:0043227//GO:0019867//GO:0044429//GO:0031967//GO:0005623//GO:0044424//GO:0005741//GO:0005740//GO:0005575//GO:0044464//GO:0031966//GO:0043231//GO:0043226//GO:0005737//GO:0005739//GO:0031968//GO:0031975//GO:0031090//GO:0005622//GO:0044446//GO:0044422	membrane//cytoplasmic part//intracellular organelle//membrane-bounded organelle//outer membrane//mitochondrial part//organelle envelope//cell//intracellular part//mitochondrial outer membrane//mitochondrial envelope//cellular_component//cell part//mitochondrial membrane//intracellular membrane-bounded organelle//organelle//cytoplasm//mitochondrion//organelle outer membrane//envelope//organelle me…	GO:0003824//GO:0022832//GO:0016741//GO:0043169//GO:0008172//GO:0046872//GO:0042085//GO:0005253//GO:0022857//GO:0015267//GO:0022892//GO:0022803//GO:0003674//GO:0022839//GO:0008308//GO:0005215//GO:0043167//GO:0022891//GO:0005488//GO:0005244//GO:0015075//GO:0003871//GO:0016740//GO:0022838//GO:0022836//GO:0008509//GO:0046914//GO:0008270//GO:0005216//GO:0008168	catalytic activity//voltage-gated channel activity//transferase activity, transferring one-carbon groups//cation binding//S-methyltransferase activity//metal ion binding//5-methyltetrahydropteroyltri-L-glutamate-dependent methyltransferase activity//anion channel activity//transmembrane transporter activity//channel activity//substrate-specific transporter activity//passive transmembrane transpor…
Csa5G598720	protein TRANSPARENT TESTA 12-like; K03327 multidrug resistance protein, MATE family	http://www.genome.jp/dbget-bin/www_bget?csv:101220883	GO:0051234//GO:0008150//GO:0051179//GO:0050896//GO:0009987//GO:0006810//GO:0006855//GO:0042221//GO:0055085//GO:0042493//GO:0015893	establishment of localization//biological_process//localization//response to stimulus//cellular process//transport//drug transmembrane transport//response to chemical stimulus//transmembrane transport//response to drug//drug transport	GO:0016020//GO:0005575//GO:0019012//GO:0044423//GO:0019028	membrane//cellular_component//virion//virion part//viral capsid	GO:0022857//GO:0022804//GO:0015297//GO:0003674//GO:0005215//GO:0015238//GO:0015291	transmembrane transporter activity//active transmembrane transporter activity//antiporter activity//molecular_function//transporter activity//drug transmembrane transporter activity//secondary active transmembrane transporter activity
Csa5G603940	probable galacturonosyltransferase-like 9-like	http://www.genome.jp/dbget-bin/www_bget?csv:101209017	--	--	--	--	GO:0003824//GO:0003674//GO:0016757//GO:0016740//GO:0005488//GO:0030246	catalytic activity//molecular_function//transferase activity, transferring glycosyl groups//transferase activity//binding//carbohydrate binding
Csa5G611700	probable ribose-5-phosphate isomerase-like; K01807 ribose 5-phosphate isomerase A [EC:5.3.1.6]	http://www.genome.jp/dbget-bin/www_bget?csv:101211316	GO:0019362//GO:0006007//GO:0009052//GO:0009987//GO:0006753//GO:0019321//GO:0005975//GO:0019318//GO:0006739//GO:0071704//GO:0006098//GO:0006732//GO:0006807//GO:0046483//GO:0006725//GO:0008150//GO:0006139//GO:0072524//GO:0044281//GO:0006733//GO:0051186//GO:0006006//GO:0055114//GO:0019320//GO:0055086//GO:0034641//GO:0046365//GO:0046496//GO:0006740//GO:0005996//GO:0044237//GO:0019637//GO:0044238//GO:…	pyridine nucleotide metabolic process//glucose catabolic process//pentose-phosphate shunt, non-oxidative branch//cellular process//nucleoside phosphate metabolic process//pentose metabolic process//carbohydrate metabolic process//hexose metabolic process//NADP metabolic process//organic substance metabolic process//pentose-phosphate shunt//coenzyme metabolic process//nitrogen compound metabolic p…	--	--	GO:0003674//GO:0016860//GO:0004751//GO:0003824//GO:0016861//GO:0030246//GO:0016853//GO:0005488	molecular_function//intramolecular oxidoreductase activity//ribose-5-phosphate isomerase activity//catalytic activity//intramolecular oxidoreductase activity, interconverting aldoses and ketoses//carbohydrate binding//isomerase activity//binding
Csa5G613600	uncharacterized LOC101232182	http://www.genome.jp/dbget-bin/www_bget?csv:101232182	--	--	--	--	--	--
Csa5G641610	transcription factor MYB59-like; K09422 myb proto-oncogene protein, plant	http://www.genome.jp/dbget-bin/www_bget?csv:101217034	--	--	--	--	GO:0003674//GO:0003677//GO:0003676//GO:0097159//GO:0005488	molecular_function//DNA binding//nucleic acid binding//organic cyclic compound binding//binding
Csa6G007470	selenium-binding protein 2-like; K17285 selenium-binding protein 1	http://www.genome.jp/dbget-bin/www_bget?csv:101213660	--	--	--	--	GO:0005488//GO:0008430//GO:0003674	binding//selenium binding//molecular_function
Csa6G014510	--	--	--	--	--	--	--	--
Csa6G014800	cellulose synthase A catalytic subunit 6 [UDP-forming]-like; K10999 cellulose synthase A [EC:2.4.1.12]	http://www.genome.jp/dbget-bin/www_bget?csv:101214061	GO:0030243//GO:0044237//GO:0051274//GO:0034645//GO:0006073//GO:0016051//GO:0009059//GO:0044042//GO:0008152//GO:0044264//GO:0030244//GO:0044249//GO:0044238//GO:0044262//GO:0005976//GO:0071704//GO:0043170//GO:0005975//GO:0051273//GO:0009058//GO:0009987//GO:0009250//GO:0000271//GO:0044260//GO:0033692//GO:0008150//GO:0034637	cellulose metabolic process//cellular metabolic process//beta-glucan biosynthetic process//cellular macromolecule biosynthetic process//cellular glucan metabolic process//carbohydrate biosynthetic process//macromolecule biosynthetic process//glucan metabolic process//metabolic process//cellular polysaccharide metabolic process//cellulose biosynthetic process//cellular biosynthetic process//primar…	GO:0005575//GO:0016020	cellular_component//membrane	GO:0008194//GO:0016757//GO:0016740//GO:0016760//GO:0016759//GO:0016758//GO:0003674//GO:0046527//GO:0035251//GO:0003824	UDP-glycosyltransferase activity//transferase activity, transferring glycosyl groups//transferase activity//cellulose synthase (UDP-forming) activity//cellulose synthase activity//transferase activity, transferring hexosyl groups//molecular_function//glucosyltransferase activity//UDP-glucosyltransferase activity//catalytic activity
Csa6G032470	uncharacterized LOC101211044	http://www.genome.jp/dbget-bin/www_bget?csv:101211044	GO:0044237//GO:0051716//GO:0033554//GO:0034641//GO:0006281//GO:0008152//GO:0090304//GO:0044238//GO:0006974//GO:0006950//GO:0043170//GO:0071704//GO:0009987//GO:0006259//GO:0044260//GO:0006807//GO:0046483//GO:0050896//GO:0006725//GO:0006139//GO:0008150	cellular metabolic process//cellular response to stimulus//cellular response to stress//cellular nitrogen compound metabolic process//DNA repair//metabolic process//nucleic acid metabolic process//primary metabolic process//response to DNA damage stimulus//response to stress//macromolecule metabolic process//organic substance metabolic process//cellular process//DNA metabolic process//cellular ma…	--	--	GO:0005488//GO:0003674//GO:0005515//GO:0003824	binding//molecular_function//protein binding//catalytic activity
Csa6G055410	phytosulfokine receptor 2-like	http://www.genome.jp/dbget-bin/www_bget?csv:101222159	GO:0043170//GO:0071704//GO:0009987//GO:0019538//GO:0044260//GO:0008150//GO:0044237//GO:0044267//GO:0016310//GO:0006796//GO:0006468//GO:0006793//GO:0008152//GO:0044238//GO:0043412//GO:0006464	macromolecule metabolic process//organic substance metabolic process//cellular process//protein metabolic process//cellular macromolecule metabolic process//biological_process//cellular metabolic process//cellular protein metabolic process//phosphorylation//phosphate-containing compound metabolic process//protein phosphorylation//phosphorus metabolic process//metabolic process//primary metabolic …	--	--	GO:0017076//GO:0016301//GO:0032553//GO:0030554//GO:0003674//GO:0005524//GO:0016772//GO:0001883//GO:0003824//GO:0043168//GO:0000166//GO:0001882//GO:0097159//GO:0032550//GO:0032559//GO:0004672//GO:0035639//GO:0032555//GO:0016740//GO:0016773//GO:0043167//GO:0032549//GO:0005488	purine nucleotide binding//kinase activity//ribonucleotide binding//adenyl nucleotide binding//molecular_function//ATP binding//transferase activity, transferring phosphorus-containing groups//purine nucleoside binding//catalytic activity//anion binding//nucleotide binding//nucleoside binding//organic cyclic compound binding//purine ribonucleoside binding//adenyl ribonucleotide binding//protein k…
Csa6G080370	putative invertase inhibitor-like	http://www.genome.jp/dbget-bin/www_bget?csv:101208758	--	--	--	--	GO:0008237//GO:0008233//GO:0004222//GO:0016788//GO:0003824//GO:0004857//GO:0003674//GO:0052689//GO:0030599//GO:0030234//GO:0016787//GO:0004175//GO:0070011	metallopeptidase activity//peptidase activity//metalloendopeptidase activity//hydrolase activity, acting on ester bonds//catalytic activity//enzyme inhibitor activity//molecular_function//carboxylic ester hydrolase activity//pectinesterase activity//enzyme regulator activity//hydrolase activity//endopeptidase activity//peptidase activity, acting on L-amino acid peptides
Csa6G141350	uncharacterized LOC101231271	http://www.genome.jp/dbget-bin/www_bget?csv:101231271	--	--	--	--	--	--
Csa6G235570	seed biotin-containing protein SBP65-like	http://www.genome.jp/dbget-bin/www_bget?csv:101229855	--	--	--	--	--	--
Csa6G309980	beta-D-xylosidase 1-like	http://www.genome.jp/dbget-bin/www_bget?csv:101219036	GO:0051234//GO:0008150//GO:0051179//GO:0006814//GO:0006811//GO:0071704//GO:0005975//GO:0008152//GO:0006810//GO:0015672//GO:0006812//GO:0044238//GO:0030001	establishment of localization//biological_process//localization//sodium ion transport//ion transport//organic substance metabolic process//carbohydrate metabolic process//metabolic process//transport//monovalent inorganic cation transport//cation transport//primary metabolic process//metal ion transport	GO:0016020//GO:0005575	membrane//cellular_component	GO:0005319//GO:0046873//GO:0022857//GO:0008324//GO:0004553//GO:0003824//GO:0015125//GO:0022804//GO:0046943//GO:0003674//GO:0015077//GO:0015293//GO:0022892//GO:0005342//GO:0008508//GO:0005215//GO:0008028//GO:0022891//GO:0016787//GO:0015370//GO:0015075//GO:0015294//GO:0022890//GO:0008514//GO:0005343//GO:0008509//GO:0016798//GO:0015291//GO:0015081	lipid transporter activity//metal ion transmembrane transporter activity//transmembrane transporter activity//cation transmembrane transporter activity//hydrolase activity, hydrolyzing O-glycosyl compounds//catalytic activity//bile acid transmembrane transporter activity//active transmembrane transporter activity//carboxylic acid transmembrane transporter activity//molecular_function//monovalent …
Csa6G318690	--	--	--	--	--	--	--	--
Csa6G357030	1,4-alpha-glucan-branching enzyme-like; K00700 1,4-alpha-glucan branching enzyme [EC:2.4.1.18]	http://www.genome.jp/dbget-bin/www_bget?csv:101215687	GO:0005975//GO:0071704//GO:0008150//GO:0008152//GO:0044238	carbohydrate metabolic process//organic substance metabolic process//biological_process//metabolic process//primary metabolic process	--	--	GO:0003674//GO:0004553//GO:0043169//GO:0003824//GO:0016798//GO:0016787//GO:0005488//GO:0043167	molecular_function//hydrolase activity, hydrolyzing O-glycosyl compounds//cation binding//catalytic activity//hydrolase activity, acting on glycosyl bonds//hydrolase activity//binding//ion binding
Csa6G395130	2-oxoisovalerate dehydrogenase subunit alpha, mitochondrial-like; K00166 2-oxoisovalerate dehydrogenase E1 component alpha subunit [EC:1.2.4.4]	http://www.genome.jp/dbget-bin/www_bget?csv:101216977	GO:0008150//GO:0008152	biological_process//metabolic process	--	--	GO:0048037//GO:0003674//GO:0050662//GO:0030976//GO:0003824//GO:0043169//GO:0043168//GO:0097159//GO:0016903//GO:0019842//GO:0016624//GO:0016491//GO:0043167//GO:0005488	cofactor binding//molecular_function//coenzyme binding//thiamine pyrophosphate binding//catalytic activity//cation binding//anion binding//organic cyclic compound binding//oxidoreductase activity, acting on the aldehyde or oxo group of donors//vitamin binding//oxidoreductase activity, acting on the aldehyde or oxo group of donors, disulfide as acceptor//oxidoreductase activity//ion binding//bindi…
Csa6G410670	Mavicyanin; mavicyanin-like	http://www.genome.jp/dbget-bin/www_bget?csv:101203473	GO:0008152//GO:0007292//GO:0007276//GO:0044249//GO:0048610//GO:0032504//GO:0019953//GO:0048856//GO:0022412//GO:0044238//GO:0032502//GO:0044267//GO:0048468//GO:0044237//GO:0034645//GO:0007304//GO:0003006//GO:0009059//GO:0030707//GO:0022414//GO:0032501//GO:0044260//GO:0048477//GO:0048646//GO:0048609//GO:0008150//GO:0048869//GO:0010467//GO:0000003//GO:0071704//GO:0009653//GO:0043170//GO:0019538//GO:…	metabolic process//female gamete generation//gamete generation//cellular biosynthetic process//cellular process involved in reproduction//multicellular organism reproduction//sexual reproduction//anatomical structure development//cellular process involved in reproduction in multicellular organism//primary metabolic process//developmental process//cellular protein metabolic process//cell developme…	GO:0030529//GO:0071944//GO:0042600//GO:0044464//GO:0005840//GO:0043226//GO:0005737//GO:0005622//GO:0043232//GO:0030312//GO:0043228//GO:0032991//GO:0044444//GO:0043229//GO:0005575//GO:0005623//GO:0044424//GO:0005576	ribonucleoprotein complex//cell periphery//chorion//cell part//ribosome//organelle//cytoplasm//intracellular//intracellular non-membrane-bounded organelle//external encapsulating structure//non-membrane-bounded organelle//macromolecular complex//cytoplasmic part//intracellular organelle//cellular_component//cell//intracellular part//extracellular region	GO:0005213//GO:0043167//GO:0005488//GO:0003735//GO:0005198//GO:0046914//GO:0009055//GO:0043169//GO:0046872//GO:0003674//GO:0005507	structural constituent of chorion//ion binding//binding//structural constituent of ribosome//structural molecule activity//transition metal ion binding//electron carrier activity//cation binding//metal ion binding//molecular_function//copper ion binding
Csa6G425080	probable membrane-associated kinase regulator 1-like	http://www.genome.jp/dbget-bin/www_bget?csv:101216721	GO:0044237//GO:0044267//GO:0034645//GO:0009059//GO:0008152//GO:0044249//GO:0044238//GO:0071704//GO:0043170//GO:0009058//GO:0009987//GO:0006412//GO:0019538//GO:0044260//GO:0008150//GO:0010467//GO:0006414	cellular metabolic process//cellular protein metabolic process//cellular macromolecule biosynthetic process//macromolecule biosynthetic process//metabolic process//cellular biosynthetic process//primary metabolic process//organic substance metabolic process//macromolecule metabolic process//biosynthetic process//cellular process//translation//protein metabolic process//cellular macromolecule meta…	GO:0043232//GO:0005622//GO:0030529//GO:0005840//GO:0044464//GO:0043226//GO:0005737//GO:0005575//GO:0044424//GO:0005623//GO:0043228//GO:0044444//GO:0032991//GO:0043229	intracellular non-membrane-bounded organelle//intracellular//ribonucleoprotein complex//ribosome//cell part//organelle//cytoplasm//cellular_component//intracellular part//cell//non-membrane-bounded organelle//cytoplasmic part//macromolecular complex//intracellular organelle	GO:0005198//GO:0016787//GO:0003735//GO:0003674//GO:0016788//GO:0003824	structural molecule activity//hydrolase activity//structural constituent of ribosome//molecular_function//hydrolase activity, acting on ester bonds//catalytic activity
Csa6G495800	--	--	--	--	--	--	--	--
Csa6G500570	type I inositol 1,4,5-trisphosphate 5-phosphatase CVP2-like	http://www.genome.jp/dbget-bin/www_bget?csv:101212076	GO:0009056//GO:0044270//GO:0042440//GO:0008152//GO:0033015//GO:0033013//GO:0042168//GO:0044248//GO:0044237//GO:0006787//GO:0042167//GO:0034641//GO:0051186//GO:0051187//GO:0055114//GO:0006807//GO:0046483//GO:0006725//GO:0008150//GO:0019439//GO:0006778//GO:0046149//GO:0071704//GO:0009987//GO:0046700	catabolic process//cellular nitrogen compound catabolic process//pigment metabolic process//metabolic process//tetrapyrrole catabolic process//tetrapyrrole metabolic process//heme metabolic process//cellular catabolic process//cellular metabolic process//porphyrin-containing compound catabolic process//heme catabolic process//cellular nitrogen compound metabolic process//cofactor metabolic proces…	--	--	GO:0016491//GO:0043167//GO:0016628//GO:0004074//GO:0005488//GO:0016627//GO:0008270//GO:0046914//GO:0046872//GO:0043169//GO:0003824//GO:0003674	oxidoreductase activity//ion binding//oxidoreductase activity, acting on the CH-CH group of donors, NAD or NADP as acceptor//biliverdin reductase activity//binding//oxidoreductase activity, acting on the CH-CH group of donors//zinc ion binding//transition metal ion binding//metal ion binding//cation binding//catalytic activity//molecular_function
Csa6G511620	scarecrow-like protein 13-like	http://www.genome.jp/dbget-bin/www_bget?csv:101229943	--	--	--	--	--	--
Csa6G516740	flavoprotein WrbA-like; K03809 Trp repressor binding protein	http://www.genome.jp/dbget-bin/www_bget?csv:101214126	--	--	--	--	GO:0003674//GO:0032553//GO:0048037//GO:0050662//GO:0003824//GO:0010181//GO:0097159//GO:0000166//GO:0043168//GO:0005488//GO:0043167//GO:0016491	molecular_function//ribonucleotide binding//cofactor binding//coenzyme binding//catalytic activity//FMN binding//organic cyclic compound binding//nucleotide binding//anion binding//binding//ion binding//oxidoreductase activity
Csa6G516960	F-box protein SKIP27-like	http://www.genome.jp/dbget-bin/www_bget?csv:101211140	--	--	--	--	GO:0005515//GO:0003674//GO:0005488	protein binding//molecular_function//binding
Csa6G520430	subtilisin-like protease-like	http://www.genome.jp/dbget-bin/www_bget?csv:101217410	GO:0006508//GO:0019538//GO:0050790//GO:0065007//GO:0071704//GO:0043170//GO:0008150//GO:0019222//GO:0043086//GO:0050789//GO:0044092//GO:0044238//GO:0008152//GO:0065009	proteolysis//protein metabolic process//regulation of catalytic activity//biological regulation//organic substance metabolic process//macromolecule metabolic process//biological_process//regulation of metabolic process//negative regulation of catalytic activity//regulation of biological process//negative regulation of molecular function//primary metabolic process//metabolic process//regulation of…	--	--	GO:0017171//GO:0005515//GO:0003674//GO:0004252//GO:0003824//GO:0008236//GO:0008233//GO:0042802//GO:0070011//GO:0005488//GO:0004175//GO:0016787	serine hydrolase activity//protein binding//molecular_function//serine-type endopeptidase activity//catalytic activity//serine-type peptidase activity//peptidase activity//identical protein binding//peptidase activity, acting on L-amino acid peptides//binding//endopeptidase activity//hydrolase activity
Csa6G525220	uncharacterized LOC101211872	http://www.genome.jp/dbget-bin/www_bget?csv:101211872	GO:0008150//GO:0071702//GO:0051179//GO:0051234//GO:0019538//GO:0006508//GO:0043170//GO:0071704//GO:0044238//GO:0033036//GO:0008152//GO:0006810//GO:0045184//GO:0015031//GO:0008104	biological_process//organic substance transport//localization//establishment of localization//protein metabolic process//proteolysis//macromolecule metabolic process//organic substance metabolic process//primary metabolic process//macromolecule localization//metabolic process//transport//establishment of protein localization//protein transport//protein localization	GO:0016020//GO:0005575	membrane//cellular_component	GO:0003824//GO:0008233//GO:0008234//GO:0003674//GO:0016787//GO:0004175//GO:0070011//GO:0004197	catalytic activity//peptidase activity//cysteine-type peptidase activity//molecular_function//hydrolase activity//endopeptidase activity//peptidase activity, acting on L-amino acid peptides//cysteine-type endopeptidase activity
Csa7G045560	5' exonuclease Apollo-like; K15341 DNA cross-link repair 1B protein [EC:3.1.-.-]	http://www.genome.jp/dbget-bin/www_bget?csv:101219892	GO:0071822//GO:0034622//GO:0022607//GO:0071840//GO:0065003//GO:0043623//GO:0044085//GO:0070271//GO:0008150//GO:0043933//GO:0006461//GO:0016043//GO:0017004	protein complex subunit organization//cellular macromolecular complex assembly//cellular component assembly//cellular component organization or biogenesis//macromolecular complex assembly//cellular protein complex assembly//cellular component biogenesis//protein complex biogenesis//biological_process//macromolecular complex subunit organization//protein complex assembly//cellular component organi…	GO:0043234//GO:0044464//GO:0016021//GO:0044436//GO:0044425//GO:0005622//GO:0009512//GO:0016020//GO:0032991//GO:0044424//GO:0005623//GO:0031224//GO:0005575//GO:0009579	protein complex//cell part//integral to membrane//thylakoid part//membrane part//intracellular//cytochrome b6f complex//membrane//macromolecular complex//intracellular part//cell//intrinsic to membrane//cellular_component//thylakoid	GO:0016787//GO:0005488//GO:0043167//GO:0046914//GO:0045158//GO:0008270//GO:0046872//GO:0043169//GO:0003824//GO:0009055//GO:0003674	hydrolase activity//binding//ion binding//transition metal ion binding//electron transporter, transferring electrons within cytochrome b6/f complex of photosystem II activity//zinc ion binding//metal ion binding//cation binding//catalytic activity//electron carrier activity//molecular_function
Csa7G048060	uncharacterized LOC101216632	http://www.genome.jp/dbget-bin/www_bget?csv:101216632	--	--	--	--	--	--
Csa7G049140	peroxidase 4-like; K00430 peroxidase [EC:1.11.1.7]	http://www.genome.jp/dbget-bin/www_bget?csv:101229961	GO:0055114//GO:0008150//GO:0050896//GO:0006979//GO:0006950//GO:0008152	oxidation-reduction process//biological_process//response to stimulus//response to oxidative stress//response to stress//metabolic process	--	--	GO:0004601//GO:0003824//GO:0046906//GO:0003674//GO:0005488//GO:0020037//GO:0016491//GO:0097159//GO:0016684//GO:0016209	peroxidase activity//catalytic activity//tetrapyrrole binding//molecular_function//binding//heme binding//oxidoreductase activity//organic cyclic compound binding//oxidoreductase activity, acting on peroxide as acceptor//antioxidant activity
Csa7G049230	ethylene-responsive transcription factor 9-like	http://www.genome.jp/dbget-bin/www_bget?csv:101229736	GO:0008152//GO:0080090//GO:0044249//GO:0031326//GO:0010556//GO:0010468//GO:2001141//GO:0018130//GO:0060255//GO:0090304//GO:0044238//GO:0044237//GO:0050789//GO:0034645//GO:0044271//GO:0034641//GO:0009889//GO:0009059//GO:0044260//GO:0016070//GO:0019219//GO:0032774//GO:0008150//GO:0006139//GO:0006725//GO:0051252//GO:0019438//GO:0046483//GO:0010467//GO:0006807//GO:0019222//GO:0006351//GO:0051171//GO:…	metabolic process//regulation of primary metabolic process//cellular biosynthetic process//regulation of cellular biosynthetic process//regulation of macromolecule biosynthetic process//regulation of gene expression//regulation of RNA biosynthetic process//heterocycle biosynthetic process//regulation of macromolecule metabolic process//nucleic acid metabolic process//primary metabolic process//ce…	--	--	GO:0003700//GO:0001071//GO:0003674	sequence-specific DNA binding transcription factor activity//nucleic acid binding transcription factor activity//molecular_function
Csa7G067430	L-type lectin-domain containing receptor kinase IX.1-like	http://www.genome.jp/dbget-bin/www_bget?csv:101209022	GO:0008150//GO:0044260//GO:0019538//GO:0009987//GO:0043170//GO:0071704//GO:0044238//GO:0043412//GO:0006464//GO:0006468//GO:0006793//GO:0008152//GO:0006796//GO:0016310//GO:0044267//GO:0044237	biological_process//cellular macromolecule metabolic process//protein metabolic process//cellular process//macromolecule metabolic process//organic substance metabolic process//primary metabolic process//macromolecule modification//protein modification process//protein phosphorylation//phosphorus metabolic process//metabolic process//phosphate-containing compound metabolic process//phosphorylatio…	--	--	GO:0003824//GO:0001883//GO:0016772//GO:0005524//GO:0017076//GO:0016301//GO:0032553//GO:0003674//GO:0030554//GO:0016773//GO:0043167//GO:0032549//GO:0005488//GO:0035639//GO:0032555//GO:0016740//GO:0032559//GO:0030246//GO:0004672//GO:0043168//GO:0001882//GO:0097159//GO:0032550//GO:0000166	catalytic activity//purine nucleoside binding//transferase activity, transferring phosphorus-containing groups//ATP binding//purine nucleotide binding//kinase activity//ribonucleotide binding//molecular_function//adenyl nucleotide binding//phosphotransferase activity, alcohol group as acceptor//ion binding//ribonucleoside binding//binding//purine ribonucleoside triphosphate binding//purine ribonu…
Csa7G071440	zinc finger protein ZAT10-like	http://www.genome.jp/dbget-bin/www_bget?csv:101213173	GO:0009259//GO:0015986//GO:0015985//GO:0009260//GO:0042451//GO:0034654//GO:0009058//GO:0009144//GO:0009987//GO:0006753//GO:0009206//GO:0072522//GO:0046034//GO:0009116//GO:0071704//GO:0019693//GO:0009150//GO:0006811//GO:0006807//GO:0046483//GO:0019438//GO:0009119//GO:0006725//GO:0008150//GO:0046390//GO:0006139//GO:0006163//GO:0009163//GO:0046128//GO:0051179//GO:0015992//GO:0044281//GO:0072521//GO:…	ribonucleotide metabolic process//ATP synthesis coupled proton transport//energy coupled proton transport, down electrochemical gradient//ribonucleotide biosynthetic process//purine nucleoside biosynthetic process//nucleobase-containing compound biosynthetic process//biosynthetic process//purine nucleoside triphosphate metabolic process//cellular process//nucleoside phosphate metabolic process//p…	GO:0005740//GO:0005623//GO:0044424//GO:0005575//GO:0016469//GO:0045263//GO:0043229//GO:0043227//GO:0032991//GO:0005753//GO:0016020//GO:0044444//GO:0000276//GO:0045259//GO:0031967//GO:0044429//GO:0031975//GO:0005743//GO:0031090//GO:0044455//GO:0019866//GO:0044422//GO:0005622//GO:0033177//GO:0044425//GO:0044446//GO:0031966//GO:0043231//GO:0043226//GO:0005737//GO:0044464//GO:0043234//GO:0005739	mitochondrial envelope//cell//intracellular part//cellular_component//proton-transporting two-sector ATPase complex//proton-transporting ATP synthase complex, coupling factor F(o)//intracellular organelle//membrane-bounded organelle//macromolecular complex//mitochondrial proton-transporting ATP synthase complex//membrane//cytoplasmic part//mitochondrial proton-transporting ATP synthase complex, c…	GO:0022892//GO:0015077//GO:0003674//GO:0046872//GO:0043169//GO:0008324//GO:0022857//GO:0015078//GO:0046914//GO:0022890//GO:0008270//GO:0015075//GO:0005215//GO:0043167//GO:0022891//GO:0005488	substrate-specific transporter activity//monovalent inorganic cation transmembrane transporter activity//molecular_function//metal ion binding//cation binding//cation transmembrane transporter activity//transmembrane transporter activity//hydrogen ion transmembrane transporter activity//transition metal ion binding//inorganic cation transmembrane transporter activity//zinc ion binding//ion transm…
Csa7G071700	cinnamyl alcohol dehydrogenase 1-like; K00083 cinnamyl-alcohol dehydrogenase [EC:1.1.1.195]	http://www.genome.jp/dbget-bin/www_bget?csv:101214622	GO:0043170//GO:0006753//GO:0006950//GO:0005975//GO:0006739//GO:0019318//GO:0071704//GO:0006098//GO:0009987//GO:0006007//GO:0019362//GO:0044260//GO:0044281//GO:0006259//GO:0051186//GO:0006733//GO:0055114//GO:0006006//GO:0006732//GO:0046483//GO:0006807//GO:0008150//GO:0006139//GO:0006725//GO:0050896//GO:0072524//GO:0046365//GO:0046496//GO:0051716//GO:0044237//GO:0005996//GO:0006740//GO:0055086//GO:…	macromolecule metabolic process//nucleoside phosphate metabolic process//response to stress//carbohydrate metabolic process//NADP metabolic process//hexose metabolic process//organic substance metabolic process//pentose-phosphate shunt//cellular process//glucose catabolic process//pyridine nucleotide metabolic process//cellular macromolecule metabolic process//small molecule metabolic process//DN…	--	--	GO:0003674//GO:0048037//GO:0016616//GO:0016614//GO:0046872//GO:0003824//GO:0043169//GO:0008677//GO:0008270//GO:0046914//GO:0004616//GO:0016491//GO:0005488//GO:0043167	molecular_function//cofactor binding//oxidoreductase activity, acting on the CH-OH group of donors, NAD or NADP as acceptor//oxidoreductase activity, acting on CH-OH group of donors//metal ion binding//catalytic activity//cation binding//2-dehydropantoate 2-reductase activity//zinc ion binding//transition metal ion binding//phosphogluconate dehydrogenase (decarboxylating) activity//oxidoreductase…
Csa7G072770	22.7 kDa class IV heat shock protein-like; K13993 HSP20 family protein	http://www.genome.jp/dbget-bin/www_bget?csv:101220889	--	--	--	--	--	--
Csa7G073700	ethylene-responsive transcription factor ERF109-like	http://www.genome.jp/dbget-bin/www_bget?csv:101219627	GO:0065007//GO:0034654//GO:2000112//GO:0009058//GO:0031323//GO:0009987//GO:0043170//GO:0050794//GO:0006355//GO:0071704//GO:0051171//GO:0006351//GO:0019222//GO:0006807//GO:0010467//GO:0019438//GO:0046483//GO:0006725//GO:0051252//GO:0006139//GO:0008150//GO:0019219//GO:0032774//GO:0044260//GO:0016070//GO:0009059//GO:0009889//GO:0034641//GO:0044271//GO:0034645//GO:0050789//GO:0044237//GO:0090304//GO:…	biological regulation//nucleobase-containing compound biosynthetic process//regulation of cellular macromolecule biosynthetic process//biosynthetic process//regulation of cellular metabolic process//cellular process//macromolecule metabolic process//regulation of cellular process//regulation of transcription, DNA-dependent//organic substance metabolic process//regulation of nitrogen compound meta…	--	--	GO:0003674//GO:0001071//GO:0003700	molecular_function//nucleic acid binding transcription factor activity//sequence-specific DNA binding transcription factor activity
Csa7G298820	UPF0496 protein 4-like	http://www.genome.jp/dbget-bin/www_bget?csv:101216228	GO:0046907//GO:0051641//GO:0006810//GO:0048193//GO:0016192//GO:0051649//GO:0009987//GO:0051234//GO:0008150//GO:0051179	intracellular transport//cellular localization//transport//Golgi vesicle transport//vesicle-mediated transport//establishment of localization in cell//cellular process//establishment of localization//biological_process//localization	GO:0005575//GO:0016020	cellular_component//membrane	--	--
Csa7G312930	stromal 70 kDa heat shock-related protein, chloroplastic-like	http://www.genome.jp/dbget-bin/www_bget?csv:101212307	GO:0005975//GO:2000113//GO:0006355//GO:0043170//GO:0050794//GO:0016043//GO:0071704//GO:0051171//GO:0006351//GO:0009653//GO:0065007//GO:0007049//GO:0031323//GO:0009058//GO:0009987//GO:0031327//GO:2000112//GO:0034654//GO:0045892//GO:0032989//GO:0016070//GO:0044260//GO:0010605//GO:0010558//GO:0055114//GO:0006807//GO:0046483//GO:0019438//GO:0010467//GO:0019222//GO:0051253//GO:0009890//GO:0032774//GO:…	carbohydrate metabolic process//negative regulation of cellular macromolecule biosynthetic process//regulation of transcription, DNA-dependent//macromolecule metabolic process//regulation of cellular process//cellular component organization//organic substance metabolic process//regulation of nitrogen compound metabolic process//transcription, DNA-dependent//anatomical structure morphogenesis//bio…	GO:0019861	flagellum	GO:0003674//GO:0005515//GO:0016772//GO:0003824//GO:0016740//GO:0016787//GO:0016773//GO:0016491//GO:0005488	molecular_function//protein binding//transferase activity, transferring phosphorus-containing groups//catalytic activity//transferase activity//hydrolase activity//phosphotransferase activity, alcohol group as acceptor//oxidoreductase activity//binding
Csa7G394060	--	--	--	--	--	--	--	--
Csa7G407550	uncharacterized LOC101220023	http://www.genome.jp/dbget-bin/www_bget?csv:101220023	GO:0044238//GO:0008152//GO:0006629//GO:0008150//GO:0009058//GO:0071704	primary metabolic process//metabolic process//lipid metabolic process//biological_process//biosynthetic process//organic substance metabolic process	--	--	GO:0016787//GO:0016298//GO:0016788//GO:0003824//GO:0004806//GO:0052689//GO:0003674	hydrolase activity//lipase activity//hydrolase activity, acting on ester bonds//catalytic activity//triglyceride lipase activity//carboxylic ester hydrolase activity//molecular_function
Csa7G427120	cytokinin riboside 5'-monophosphate phosphoribohydrolase LOG1-like; K06966	http://www.genome.jp/dbget-bin/www_bget?csv:101211145	GO:0044249//GO:0015672//GO:0008152//GO:0006810//GO:0006812//GO:0044238//GO:0034645//GO:0044267//GO:0030001//GO:0044237//GO:0009059//GO:0044260//GO:0051234//GO:0010467//GO:0008150//GO:0051179//GO:0043170//GO:0071704//GO:0006811//GO:0006814//GO:0019538//GO:0009058//GO:0006412//GO:0009987	cellular biosynthetic process//monovalent inorganic cation transport//metabolic process//transport//cation transport//primary metabolic process//cellular macromolecule biosynthetic process//cellular protein metabolic process//metal ion transport//cellular metabolic process//macromolecule biosynthetic process//cellular macromolecule metabolic process//establishment of localization//gene expression…	GO:0030529//GO:0043226//GO:0005737//GO:0044464//GO:0005840//GO:0043232//GO:0005622//GO:0043228//GO:0043229//GO:0032991//GO:0044444//GO:0005575//GO:0005623//GO:0044424	ribonucleoprotein complex//organelle//cytoplasm//cell part//ribosome//intracellular non-membrane-bounded organelle//intracellular//non-membrane-bounded organelle//intracellular organelle//macromolecular complex//cytoplasmic part//cellular_component//cell//intracellular part	GO:0042086//GO:0016740//GO:0003735//GO:0043167//GO:0005488//GO:0008168//GO:0005198//GO:0030269//GO:0046914//GO:0046872//GO:0003824//GO:0016741//GO:0008172//GO:0043169//GO:0050897//GO:0003674	5-methyl-5,6,7,8-tetrahydromethanopterin-dependent methyltransferase activity//transferase activity//structural constituent of ribosome//ion binding//binding//methyltransferase activity//structural molecule activity//tetrahydromethanopterin S-methyltransferase activity//transition metal ion binding//metal ion binding//catalytic activity//transferase activity, transferring one-carbon groups//S-met…
Csa7G446930	uncharacterized LOC101226433	http://www.genome.jp/dbget-bin/www_bget?csv:101226433	--	--	--	--	--	--
Csa7G448900	aldehyde dehydrogenase family 7 member B4-like; K14085 aldehyde dehydrogenase family 7 member A1 [EC:1.2.1.31 1.2.1.8 1.2.1.3]	http://www.genome.jp/dbget-bin/www_bget?csv:101205436	GO:0008150//GO:0055114//GO:0008152	biological_process//oxidation-reduction process//metabolic process	--	--	GO:0003824//GO:0003674//GO:0016491	catalytic activity//molecular_function//oxidoreductase activity
Novel00034	uncharacterized LOC101205246	http://www.genome.jp/dbget-bin/www_bget?csv:101205246	--	--	--	--	--	--
Novel00148	uncharacterized LOC101225403	http://www.genome.jp/dbget-bin/www_bget?csv:101225403	--	--	--	--	--	--
Novel00204	--	--	--	--	--	--	--	--
Gene_ID：基因编号
KEGG AnnotInfo：该基因注释上的KO信息。包含Genename;Definition;Orthology（这三类信息可能不同时存在）
KEGG url：该基因注释上KO的网页链接地址；
biological_process：该基因注释上的生物学过程中的term
biological_process_description：该基因注释上的生物学过程中的各term的描述
cellular_component：该基因注释上的细胞组分中的term
cellular_component_description：该基因注释上的细胞组分中的各term的描述
molecular_function：该基因注释上的分子功能中的term
molecular_function_description：该基因注释上的分子功能中的各term的描述

## Sheet: Phy vs Con.venn.xls
Gene ID	KEGG Description	KEGG url	Biological Process	Biological Process Description	Cellular Component	Cellular Component Description	Molecular Function	Molecular Function Description
Csa1G324370	nitrate transporter 1.4-like	http://www.genome.jp/dbget-bin/www_bget?csv:101205385	GO:0051234//GO:0006810//GO:0006857//GO:0071702//GO:0008150//GO:0051179//GO:0071705//GO:0015833//GO:0042886	establishment of localization//transport//oligopeptide transport//organic substance transport//biological_process//localization//nitrogen compound transport//peptide transport//amide transport	GO:0016020//GO:0005575	membrane//cellular_component	GO:0005215//GO:0003674	transporter activity//molecular_function
Csa1G660200	glucan endo-1,3-beta-glucosidase, basic isoform-like	http://www.genome.jp/dbget-bin/www_bget?csv:101219328	GO:0008152//GO:0044238//GO:0071704//GO:0005975//GO:0008150	metabolic process//primary metabolic process//organic substance metabolic process//carbohydrate metabolic process//biological_process	--	--	GO:0016798//GO:0016787//GO:0003674//GO:0004553//GO:000382	hydrolase activity, acting on glycosyl bonds//hydrolase activity//molecular_function//hydrolase activity, hydrolyzing O-glycosyl compounds//catalytic activity
Csa2G008110	monogalactosyldiacylglycerol synthase 2, chloroplastic-like; K03715 1,2-diacylglycerol 3-beta-galactosyltransferase [EC:2.4.1.46]	http://www.genome.jp/dbget-bin/www_bget?csv:101215352	GO:0006629//GO:0044237//GO:0006643//GO:0006664//GO:0009247//GO:0030259//GO:0044238//GO:0046467//GO:0008152//GO:0070085//GO:0044249//GO:0009987//GO:0009058//GO:0008610//GO:0071704//GO:0005975//GO:0008150//GO:0044255//GO:0030258	lipid metabolic process//cellular metabolic process//membrane lipid metabolic process//glycolipid metabolic process//glycolipid biosynthetic process//lipid glycosylation//primary metabolic process//membrane lipid biosynthetic process//metabolic process//glycosylation//cellular biosynthetic process//cellular process//biosynthetic process//lipid biosynthetic process//organic substance metabolic pro…	--	--	GO:0030246//GO:0005488//GO:0016757//GO:0016740//GO:0003674//GO:0016758//GO:0003824	carbohydrate binding//binding//transferase activity, transferring glycosyl groups//transferase activity//molecular_function//transferase activity, transferring hexosyl groups//catalytic activity
Csa2G175170	probable inorganic phosphate transporter 1-5-like; K08176 MFS transporter, PHS family, inorganic phosphate transporter	http://www.genome.jp/dbget-bin/www_bget?csv:101212412	GO:0015995//GO:0033014//GO:0009987//GO:0009058//GO:0006778//GO:0071704//GO:0046483//GO:0019438//GO:0006807//GO:0008150//GO:0051188//GO:0006725//GO:0051179//GO:0051186//GO:0055114//GO:0051234//GO:0055085//GO:0034641//GO:0015979//GO:0044271//GO:0033013//GO:0044237//GO:0018130//GO:0006779//GO:0044249//GO:0046148//GO:0006810//GO:0008152//GO:0015994//GO:0042440	chlorophyll biosynthetic process//tetrapyrrole biosynthetic process//cellular process//biosynthetic process//porphyrin-containing compound metabolic process//organic substance metabolic process//heterocycle metabolic process//aromatic compound biosynthetic process//nitrogen compound metabolic process//biological_process//cofactor biosynthetic process//cellular aromatic compound metabolic process/…	GO:0005575//GO:0031224//GO:0016020//GO:0016021//GO:0044425	cellular_component//intrinsic to membrane//membrane//integral to membrane//membrane part	GO:0003674//GO:0003824//GO:0022857//GO:0016491//GO:0005215	molecular_function//catalytic activity//transmembrane transporter activity//oxidoreductase activity//transporter activity
Csa2G176690	PRP1; proline-rich protein	http://www.genome.jp/dbget-bin/www_bget?csv:101210961	--	--	--	--	--	--
Csa2G372810	inositol-tetrakisphosphate 1-kinase 2-like; K00913 inositol-1,3,4-trisphosphate 5/6-kinase / inositol-tetrakisphosphate 1-kinase [EC:2.7.1.159 2.7.1.134]	http://www.genome.jp/dbget-bin/www_bget?csv:101206636	GO:0008152//GO:0006793//GO:0006796//GO:0019637//GO:0044237//GO:0032957//GO:0044281//GO:0008150//GO:0006066//GO:0019751//GO:0043647//GO:0071704//GO:0009987	metabolic process//phosphorus metabolic process//phosphate-containing compound metabolic process//organophosphate metabolic process//cellular metabolic process//inositol trisphosphate metabolic process//small molecule metabolic process//biological_process//alcohol metabolic process//polyol metabolic process//inositol phosphate metabolic process//organic substance metabolic process//cellular proce…	GO:0044464//GO:0005622//GO:0005575//GO:0005623	cell part//intracellular//cellular_component//cell	GO:0016740//GO:0035639//GO:0032555//GO:0051766//GO:0005488//GO:0032549//GO:0043167//GO:0000287//GO:0016773//GO:0032550//GO:0001882//GO:0097159//GO:0000166//GO:0043168//GO:0047325//GO:0032559//GO:0016772//GO:0051765//GO:0003824//GO:0001883//GO:0043169//GO:0046872//GO:0003674//GO:0030554//GO:0032553//GO:0052726//GO:0052725//GO:0016301//GO:0017076//GO:0005524	transferase activity//purine ribonucleoside triphosphate binding//purine ribonucleotide binding//inositol trisphosphate kinase activity//binding//ribonucleoside binding//ion binding//magnesium ion binding//phosphotransferase activity, alcohol group as acceptor//purine ribonucleoside binding//nucleoside binding//organic cyclic compound binding//nucleotide binding//anion binding//inositol tetrakisp…
Csa2G382780	monogalactosyldiacylglycerol synthase, chloroplastic-like; K03715 1,2-diacylglycerol 3-beta-galactosyltransferase [EC:2.4.1.46]	http://www.genome.jp/dbget-bin/www_bget?csv:101209030	GO:0044249//GO:0070085//GO:0008152//GO:0046467//GO:0044238//GO:0030259//GO:0009247//GO:0006664//GO:0006643//GO:0044237//GO:0006629//GO:0030258//GO:0044255//GO:0008150//GO:0005975//GO:0071704//GO:0008610//GO:0009058//GO:0009987	cellular biosynthetic process//glycosylation//metabolic process//membrane lipid biosynthetic process//primary metabolic process//lipid glycosylation//glycolipid biosynthetic process//glycolipid metabolic process//membrane lipid metabolic process//cellular metabolic process//lipid metabolic process//lipid modification//cellular lipid metabolic process//biological_process//carbohydrate metabolic pr…	--	--	GO:0016740//GO:0016757//GO:0005488//GO:0030246//GO:0003824//GO:0016758//GO:0003674	transferase activity//transferase activity, transferring glycosyl groups//binding//carbohydrate binding//catalytic activity//transferase activity, transferring hexosyl groups//molecular_function
Csa3G133380	probable glutathione S-transferase-like; K00799 glutathione S-transferase [EC:2.5.1.18]	http://www.genome.jp/dbget-bin/www_bget?csv:101227857	--	--	--	--	GO:0003674//GO:0005515//GO:0005488	molecular_function//protein binding//binding
Csa3G135720	1-aminocyclopropane-1-carboxylate oxidase homolog 1-like; K06892 feruloyl-CoA ortho-hydroxylase [EC:1.14.11.-]	http://www.genome.jp/dbget-bin/www_bget?csv:101214212	GO:0055114//GO:0008150//GO:0008152	oxidation-reduction process//biological_process//metabolic process	--	--	GO:0051213//GO:0003674//GO:0016706//GO:0016705//GO:0003824//GO:0016491	dioxygenase activity//molecular_function//oxidoreductase activity, acting on paired donors, with incorporation or reduction of molecular oxygen, 2-oxoglutarate as one donor, and incorporation of one atom each of oxygen into both donors//oxidoreductase activity, acting on paired donors, with incorporation or reduction of molecular oxygen//catalytic activity//oxidoreductase activity
Csa3G180430	homeobox-leucine zipper protein ANTHOCYANINLESS 2-like; K09338 homeobox-leucine zipper protein	http://www.genome.jp/dbget-bin/www_bget?csv:101218216	GO:0009987//GO:0009058//GO:0031323//GO:0034654//GO:2000112//GO:0007049//GO:0065007//GO:0006351//GO:0071704//GO:0051171//GO:0000003//GO:0006355//GO:0000917//GO:0016043//GO:0050794//GO:0043093//GO:0043170//GO:0019219//GO:0032774//GO:0006139//GO:0008150//GO:0006725//GO:0051252//GO:0010467//GO:0019438//GO:0046483//GO:0006807//GO:0019222//GO:0032506//GO:0000910//GO:0032505//GO:0044260//GO:0016070//GO:…	cellular process//biosynthetic process//regulation of cellular metabolic process//nucleobase-containing compound biosynthetic process//regulation of cellular macromolecule biosynthetic process//cell cycle//biological regulation//transcription, DNA-dependent//organic substance metabolic process//regulation of nitrogen compound metabolic process//reproduction//regulation of transcription, DNA-depen…	GO:0044424//GO:0005623//GO:0005575//GO:0043227//GO:0043229//GO:0005634//GO:0005622//GO:0044464//GO:0005737//GO:0043226//GO:0043231	intracellular part//cell//cellular_component//membrane-bounded organelle//intracellular organelle//nucleus//intracellular//cell part//cytoplasm//organelle//intracellular membrane-bounded organelle	GO:0003674//GO:0003676//GO:0003677//GO:0097159//GO:0001071//GO:0043565//GO:0005488//GO:0003700	molecular_function//nucleic acid binding//DNA binding//organic cyclic compound binding//nucleic acid binding transcription factor activity//sequence-specific DNA binding//binding//sequence-specific DNA binding transcription factor activity
Csa3G333840	MLP-like protein 34-like	http://www.genome.jp/dbget-bin/www_bget?csv:101212424	GO:0009617//GO:0051704//GO:0006952//GO:0042742//GO:0051707//GO:0050896//GO:0008150//GO:0009607//GO:0006950	response to bacterium//multi-organism process//defense response//defense response to bacterium//response to other organism//response to stimulus//biological_process//response to biotic stimulus//response to stress	GO:0005576//GO:0005575	extracellular region//cellular_component	--	--
Csa3G576840	cyclic nucleotide-gated ion channel 1-like; K05391 cyclic nucleotide gated channel, other eukaryote	http://www.genome.jp/dbget-bin/www_bget?csv:101214911	--	--	--	-	--	--
Csa3G824940	TMV resistance protein N-like	http://www.genome.jp/dbget-bin/www_bget?csv:101220105	GO:0072511//GO:0051234//GO:0044260//GO:0016070//GO:0007165//GO:0050896//GO:0051179//GO:0032774//GO:0007154//GO:0006139//GO:0008150//GO:0006725//GO:0010467//GO:0019438//GO:0046483//GO:0006807//GO:0006351//GO:0006811//GO:0071704//GO:0050794//GO:0043170//GO:0009987//GO:0009058//GO:0034654//GO:0065007//GO:0006816//GO:0006812//GO:0008152//GO:0006810//GO:0044249//GO:0018130//GO:0044238//GO:0090304//GO:…	divalent inorganic cation transport//establishment of localization//cellular macromolecule metabolic process//RNA metabolic process//signal transduction//response to stimulus//localization//RNA biosynthetic process//cell communication//nucleobase-containing compound metabolic process//biological_process//cellular aromatic compound metabolic process//gene expression//aromatic compound biosynthetic…	GO:0016020//GO:0043227//GO:0043229//GO:0005575//GO:0044424//GO:0005623//GO:0044464//GO:0043226//GO:0043231//GO:0005622//GO:000563	membrane//membrane-bounded organelle//intracellular organelle//cellular_component//intracellular part//cell//cell part//organelle//intracellular membrane-bounded organelle//intracellular//nucleus	GO:0003676//GO:0003677//GO:0016772//GO:0001883//GO:0003824//GO:0030554//GO:0003674//GO:0032553//GO:0004857//GO:0016247//GO:0017076//GO:0005524//GO:0005515//GO:0016740//GO:0005246//GO:0060589//GO:0042030//GO:0030234//GO:0035639//GO:0032555//GO:0032549//GO:0005488//GO:0043167//GO:0043531//GO:0000166//GO:0032550//GO:0034062//GO:0097159//GO:0001882//GO:0043168//GO:0060590//GO:0016779//GO:0003899//GO:…	nucleic acid binding//DNA binding//transferase activity, transferring phosphorus-containing groups//purine nucleoside binding//catalytic activity//adenyl nucleotide binding//molecular_function//ribonucleotide binding//enzyme inhibitor activity//channel regulator activity//purine nucleotide binding//ATP binding//protein binding//transferase activity//calcium channel regulator activity//nucleoside-…
Csa3G865340	thioredoxin H-type-like; K03671 thioredoxin 1	http://www.genome.jp/dbget-bin/www_bget?csv:101219430	GO:0008150//GO:0055114//GO:0065008//GO:0019725//GO:0009987//GO:0065007//GO:0050794//GO:0008152//GO:0042592//GO:0045454//GO:0050789	biological_process//oxidation-reduction process//regulation of biological quality//cellular homeostasis//cellular process//biological regulation//regulation of cellular process//metabolic process//homeostatic process//cell redox homeostasis//regulation of biological process	--	--	GO:0003824//GO:0003674//GO:0016491//GO:0016209	catalytic activity//molecular_function//oxidoreductase activity//antioxidant activity
Csa4G000860	--	--	--	--	--	--	GO:0004866//GO:0004857//GO:0003674//GO:0004867//GO:0030234//GO:0030414//GO:0061134//GO:0061135	endopeptidase inhibitor activity//enzyme inhibitor activity//molecular_function//serine-type endopeptidase inhibitor activity//enzyme regulator activity//peptidase inhibitor activity//peptidase regulator activity//endopeptidase regulator activity
Csa4G285760	peroxidase 2-like; K00430 peroxidase [EC:1.11.1.7]	http://www.genome.jp/dbget-bin/www_bget?csv:101217543	GO:0055114//GO:0050896//GO:0008150//GO:0006979//GO:0006950//GO:0008152	oxidation-reduction process//response to stimulus//biological_process//response to oxidative stress//response to stress//metabolic process	--	--	GO:0004601//GO:0003824//GO:0046906//GO:0003674//GO:0005488//GO:0016491//GO:0020037//GO:0016684//GO:0097159//GO:0016209	peroxidase activity//catalytic activity//tetrapyrrole binding//molecular_function//binding//oxidoreductase activity//heme binding//oxidoreductase activity, acting on peroxide as acceptor//organic cyclic compound binding//antioxidant activity
Csa4G312240	pyruvate decarboxylase isozyme 1-like; K01568 pyruvate decarboxylase [EC:4.1.1.1]	http://www.genome.jp/dbget-bin/www_bget?csv:101217534	--	--	GO:0016020//GO:0005575//GO:0031224//GO:0016021//GO:0044425	membrane//cellular_component//intrinsic to membrane//integral to membrane//membrane part	GO:0046872//GO:0043169//GO:0003824//GO:0030976//GO:0050662//GO:0048037//GO:0003674//GO:0000287//GO:0043167//GO:0005488//GO:0019842//GO:0043168//GO:0097159	metal ion binding//cation binding//catalytic activity//thiamine pyrophosphate binding//coenzyme binding//cofactor binding//molecular_function//magnesium ion binding//ion binding//binding//vitamin binding//anion binding//organic cyclic compound binding
Csa5G167220	lignin-forming anionic peroxidase-like; K00430 peroxidase [EC:1.11.1.7]	http://www.genome.jp/dbget-bin/www_bget?csv:101215530	GO:0008152//GO:0006950//GO:0006979//GO:0050896//GO:0008150//GO:0055114	metabolic process//response to stress//response to oxidative stress//response to stimulus//biological_process//oxidation-reduction process	--	--	GO:0016209//GO:0016684//GO:0097159//GO:0016491//GO:0020037//GO:0005488//GO:0003674//GO:0046906//GO:0003824//GO:0004601	antioxidant activity//oxidoreductase activity, acting on peroxide as acceptor//organic cyclic compound binding//oxidoreductase activity//heme binding//binding//molecular_function//tetrapyrrole binding//catalytic activity//peroxidase activity
Csa6G108460	SPX domain-containing protein 3-like	http://www.genome.jp/dbget-bin/www_bget?csv:101206926	--	--	--	--	--	--
Csa6G133830	uncharacterized LOC101225739	http://www.genome.jp/dbget-bin/www_bget?csv:101225739	--	--	--	--	--	--
Csa6G213910	peroxidase 4-like; K00430 peroxidase [EC:1.11.1.7]	http://www.genome.jp/dbget-bin/www_bget?csv:101227020	GO:0008152//GO:0006950//GO:0055114//GO:0006979//GO:0050896//GO:0008150	metabolic process//response to stress//oxidation-reduction process//response to oxidative stress//response to stimulus//biological_process	--	--	GO:0016684//GO:0097159//GO:0016209//GO:0016491//GO:0020037//GO:0005488//GO:0003674//GO:0004601//GO:0046906//GO:0003824	oxidoreductase activity, acting on peroxide as acceptor//organic cyclic compound binding//antioxidant activity//oxidoreductase activity//heme binding//binding//molecular_function//peroxidase activity//tetrapyrrole binding//catalytic activity
Csa7G004110	purple acid phosphatase 2-like	http://www.genome.jp/dbget-bin/www_bget?csv:101211612	GO:0019637//GO:0044238//GO:0044249//GO:0006793//GO:0008152//GO:0006796//GO:0006629//GO:0006644//GO:0090407//GO:0044237//GO:0044255//GO:0008150//GO:0008610//GO:0009058//GO:0009987//GO:0008654//GO:0071704	organophosphate metabolic process//primary metabolic process//cellular biosynthetic process//phosphorus metabolic process//metabolic process//phosphate-containing compound metabolic process//lipid metabolic process//phospholipid metabolic process//organophosphate biosynthetic process//cellular metabolic process//cellular lipid metabolic process//biological_process//lipid biosynthetic process//bio…	GO:0016020//GO:0005575	membrane//cellular_component	GO:0016787//GO:0016818//GO:0005488//GO:0008715//GO:0016462//GO:0003824//GO:0016817//GO:0005515//GO:0003674	hydrolase activity//hydrolase activity, acting on acid anhydrides, in phosphorus-containing anhydrides//binding//CDP-diacylglycerol diphosphatase activity//pyrophosphatase activity//catalytic activity//hydrolase activity, acting on acid anhydrides//protein binding//molecular_function
Csa7G024010	lysM domain-containing GPI-anchored protein 2-like	http://www.genome.jp/dbget-bin/www_bget?csv:101228922	GO:0046483//GO:0006807//GO:0008150//GO:0006139//GO:0006725//GO:0044260//GO:0006259//GO:0009987//GO:0044036//GO:0043170//GO:0071704//GO:0044238//GO:0090304//GO:0071554//GO:0009056//GO:0016998//GO:0008152//GO:0006310//GO:0071840//GO:0034641//GO:0044237//GO:0044248	heterocycle metabolic process//nitrogen compound metabolic process//biological_process//nucleobase-containing compound metabolic process//cellular aromatic compound metabolic process//cellular macromolecule metabolic process//DNA metabolic process//cellular process//cell wall macromolecule metabolic process//macromolecule metabolic process//organic substance metabolic process//primary metabolic p…	--	--	GO:0003824//GO:0003676//GO:0003677//GO:0003674//GO:0005488//GO:0000150//GO:0097159	catalytic activity//nucleic acid binding//DNA binding//molecular_function//binding//recombinase activity//organic cyclic compound binding
Csa7G041870	uncharacterized LOC101227996	http://www.genome.jp/dbget-bin/www_bget?csv:101227996	--	--	GO:0016021//GO:0044425//GO:0016020//GO:0005575//GO:0031224	integral to membrane//membrane part//membrane//cellular_component//intrinsic to membrane	--	--
Csa7G324140	abscisic acid 8'-hydroxylase 3-like	http://www.genome.jp/dbget-bin/www_bget?csv:101206277	GO:0008150//GO:0055114//GO:0008152	biological_process//oxidation-reduction process//metabolic process	--	--	GO:0003674//GO:0016705//GO:0046872//GO:0046906//GO:0003824//GO:0043169//GO:0009055//GO:0046914//GO:0097159//GO:0005506//GO:0020037//GO:0016491//GO:0043167//GO:0005488	molecular_function//oxidoreductase activity, acting on paired donors, with incorporation or reduction of molecular oxygen//metal ion binding//tetrapyrrole binding//catalytic activity//cation binding//electron carrier activity//transition metal ion binding//organic cyclic compound binding//iron ion binding//heme binding//oxidoreductase activity//ion binding//binding
Csa7G451920	inorganic pyrophosphatase 2-like; K13248 pyridoxal phosphate phosphatase PHOSPHO2 [EC:3.1.3.74]	http://www.genome.jp/dbget-bin/www_bget?csv:101227725	GO:0008152//GO:0051817//GO:0044003//GO:0050789//GO:0019048//GO:0019054//GO:0044403//GO:0051704//GO:0044419//GO:0016032//GO:0065008//GO:0051701//GO:0008150//GO:0044068//GO:0035821//GO:0050794//GO:0009987//GO:0065007	metabolic process//modification of morphology or physiology of other organism involved in symbiotic interaction//modification by symbiont of host morphology or physiology//regulation of biological process//virus-host interaction//modulation by virus of host cellular process//symbiosis, encompassing mutualism through parasitism//multi-organism process//interspecies interaction between organisms//v…	--	--	GO:0030234//GO:0005488//GO:0016787//GO:0042578//GO:0003824//GO:0016788//GO:0003674//GO:0016791//GO:0004857//GO:0005515	enzyme regulator activity//binding//hydrolase activity//phosphoric ester hydrolase activity//catalytic activity//hydrolase activity, acting on ester bonds//molecular_function//phosphatase activity//enzyme inhibitor activity//protein binding
Novel00197	zinc-metallopeptidase, peroxisomal-like; K01408 insulysin [EC:3.4.24.56]	http://www.genome.jp/dbget-bin/www_bget?csv:101207568	--	--	--	--	--	--
Novel00524	vacuolar protein sorting-associated protein 55 homolog	http://www.genome.jp/dbget-bin/www_bget?csv:101210770	--	--	--	--	--	--

## Sheet: PhyxChr vs Con.venn.xls
Gene ID	KEGG Description	KEGG url	Biological Process	Biological Process Description	Cellular Component	Cellular Component Description	Molecular Function	Molecular Function Description
Csa1G001470	uncharacterized LOC101212373	http://www.genome.jp/dbget-bin/www_bget?csv:101212373	--	--	--	--	--	--
Csa1G002060	SNF1-related protein kinase regulatory subunit gamma-1-like	http://www.genome.jp/dbget-bin/www_bget?csv:101225486	--	--	--	--	GO:0003674//GO:0005515//GO:0005488	molecular_function//protein binding//binding
Csa1G002120	ribonuclease J-like	http://www.genome.jp/dbget-bin/www_bget?csv:101215740	GO:0006811//GO:0006812//GO:0006814//GO:0015672//GO:0051234//GO:0030001//GO:0006810//GO:0051179//GO:0008150	ion transport//cation transport//sodium ion transport//monovalent inorganic cation transport//establishment of localization//metal ion transport//transport//localization//biological_process	--	--	GO:0003677//GO:0003676//GO:0097159//GO:0003674//GO:0016787//GO:0005488//GO:0016829//GO:0003824	DNA binding//nucleic acid binding//organic cyclic compound binding//molecular_function//hydrolase activity//binding//lyase activity//catalytic activity
Csa1G002660	probable aspartyl aminopeptidase-like; K01267 aspartyl aminopeptidase [EC:3.4.11.21]	http://www.genome.jp/dbget-bin/www_bget?csv:101229094	GO:0008152//GO:0071704//GO:0043170//GO:0019538//GO:0008150//GO:0006508//GO:0044238	metabolic process//organic substance metabolic process//macromolecule metabolic process//protein metabolic process//biological_process//proteolysis//primary metabolic process	--	--	GO:0003674//GO:0004177//GO:0008233//GO:0008270//GO:0070011//GO:0003824//GO:0043169//GO:0005488//GO:0043167//GO:0046872//GO:0008238//GO:0046914//GO:0016787	molecular_function//aminopeptidase activity//peptidase activity//zinc ion binding//peptidase activity, acting on L-amino acid peptides//catalytic activity//cation binding//binding//ion binding//metal ion binding//exopeptidase activity//transition metal ion binding//hydrolase activity
Csa1G002670	probable mitochondrial pyruvate carrier 2-like	http://www.genome.jp/dbget-bin/www_bget?csv:101229540	--	--	--	--	--	--
Csa1G002760	oxygen-independent coproporphyrinogen-III oxidase-like protein sll1917-like; K02495 oxygen-independent coproporphyrinogen III oxidase [EC:1.3.99.22]	http://www.genome.jp/dbget-bin/www_bget?csv:101231893	--	--	--	--	GO:0051536//GO:0003674//GO:0051540//GO:0005488//GO:0003824	iron-sulfur cluster binding//molecular_function//metal cluster binding//binding//catalytic activity
Csa1G002830	abhydrolase domain-containing protein FAM108C1-like	http://www.genome.jp/dbget-bin/www_bget?csv:101230583	GO:0006508//GO:0019538//GO:0008150//GO:0044238//GO:0006629//GO:0071704//GO:0008152//GO:0009056//GO:0016042//GO:0043170	proteolysis//protein metabolic process//biological_process//primary metabolic process//lipid metabolic process//organic substance metabolic process//metabolic process//catabolic process//lipid catabolic process//macromolecule metabolic process	--	--	GO:0016788//GO:0004806//GO:0003824//GO:0052689//GO:0017171//GO:0016787//GO:0008236//GO:0008238//GO:0016298//GO:0004177//GO:0008233//GO:0003674//GO:0070011	hydrolase activity, acting on ester bonds//triglyceride lipase activity//catalytic activity//carboxylic ester hydrolase activity//serine hydrolase activity//hydrolase activity//serine-type peptidase activity//exopeptidase activity//lipase activity//aminopeptidase activity//peptidase activity//molecular_function//peptidase activity, acting on L-amino acid peptides
Csa1G003520	pentatricopeptide repeat-containing protein At1g08070-like	http://www.genome.jp/dbget-bin/www_bget?csv:101224049	GO:0019538//GO:0008610//GO:0008150//GO:0009247//GO:0009987//GO:0006650//GO:0006464//GO:0046488//GO:0009058//GO:0046486//GO:0019637//GO:0044255//GO:0006629//GO:0009059//GO:0043412//GO:0042158//GO:0044238//GO:0046467//GO:0006793//GO:0008152//GO:0042157//GO:0090407//GO:0006505//GO:0044267//GO:0044237//GO:0006796//GO:0006643//GO:0071704//GO:0008654//GO:0044260//GO:0046474//GO:0045017//GO:0044249//GO:…	protein metabolic process//lipid biosynthetic process//biological_process//glycolipid biosynthetic process//cellular process//glycerophospholipid metabolic process//protein modification process//phosphatidylinositol metabolic process//biosynthetic process//glycerolipid metabolic process//organophosphate metabolic process//cellular lipid metabolic process//lipid metabolic process//macromolecule bi…	GO:0048222//GO:0044464//GO:0016020//GO:0009530//GO:0005623//GO:0071944//GO:0009505//GO:0044426//GO:0044462//GO:0005618//GO:0044444//GO:0044424//GO:0044432//GO:0043229//GO:0005789//GO:0043231//GO:0005737//GO:0016021//GO:0042175//GO:0043227//GO:0043226//GO:0031090//GO:0044425//GO:0030312//GO:0005622//GO:0044446//GO:0012505//GO:0005783//GO:0031224//GO:0005575//GO:0044422	glycoprotein network//cell part//membrane//primary cell wall//cell//cell periphery//plant-type cell wall//cell wall part//external encapsulating structure part//cell wall//cytoplasmic part//intracellular part//endoplasmic reticulum part//intracellular organelle//endoplasmic reticulum membrane//intracellular membrane-bounded organelle//cytoplasm//integral to membrane//nuclear outer membrane-endopl…	GO:0003824//GO:0016746//GO:0003674//GO:0016740	catalytic activity//transferase activity, transferring acyl groups//molecular_function//transferase activity
Csa1G004040	cytochrome P450 71A22-like	http://www.genome.jp/dbget-bin/www_bget?csv:101203222	GO:0055114//GO:0008152//GO:0008150	oxidation-reduction process//metabolic process//biological_process	--	--	GO:0097159//GO:0005506//GO:0009055//GO:0003674//GO:0043167//GO:0005488//GO:0043169//GO:0003824//GO:0046906//GO:0046914//GO:0016491//GO:0020037//GO:0046872//GO:0016705	organic cyclic compound binding//iron ion binding//electron carrier activity//molecular_function//ion binding//binding//cation binding//catalytic activity//tetrapyrrole binding//transition metal ion binding//oxidoreductase activity//heme binding//metal ion binding//oxidoreductase activity, acting on paired donors, with incorporation or reduction of molecular oxygen
Csa1G004240	probable LRR receptor-like serine/threonine-protein kinase At4g26540-like	http://www.genome.jp/dbget-bin/www_bget?csv:101206847	GO:0043170//GO:0044267//GO:0071704//GO:0044237//GO:0019538//GO:0016310//GO:0009987//GO:0044260//GO:0006468//GO:0008152//GO:0006793//GO:0006796//GO:0044238//GO:0043412//GO:0008150//GO:0006464	macromolecule metabolic process//cellular protein metabolic process//organic substance metabolic process//cellular metabolic process//protein metabolic process//phosphorylation//cellular process//cellular macromolecule metabolic process//protein phosphorylation//metabolic process//phosphorus metabolic process//phosphate-containing compound metabolic process//primary metabolic process//macromolecu…	--	--	GO:0017076//GO:0016301//GO:0043168//GO:0001882//GO:0097159//GO:0003674//GO:0032550//GO:0030554//GO:0032553//GO:0000166//GO:0005515//GO:0032559//GO:0004672//GO:0005524//GO:0035639//GO:0032555//GO:0016772//GO:0016740//GO:0016773//GO:0003824//GO:0043167//GO:0032549//GO:0001883//GO:0005488	purine nucleotide binding//kinase activity//anion binding//nucleoside binding//organic cyclic compound binding//molecular_function//purine ribonucleoside binding//adenyl nucleotide binding//ribonucleotide binding//nucleotide binding//protein binding//adenyl ribonucleotide binding//protein kinase activity//ATP binding//purine ribonucleoside triphosphate binding//purine ribonucleotide binding//tran…
Csa1G005520	aldehyde dehydrogenase family 2 member B4, mitochondrial-like; K00128 aldehyde dehydrogenase (NAD+) [EC:1.2.1.3]	http://www.genome.jp/dbget-bin/www_bget?csv:101209430	GO:0006310//GO:0034641//GO:0009987//GO:0043170//GO:0015074//GO:0032196//GO:0071704//GO:0044237//GO:0006807//GO:0090304//GO:0044238//GO:0046483//GO:0006725//GO:0008150//GO:0006139//GO:0044260//GO:0006313//GO:0006259//GO:0055114//GO:0008152	DNA recombination//cellular nitrogen compound metabolic process//cellular process//macromolecule metabolic process//DNA integration//transposition//organic substance metabolic process//cellular metabolic process//nitrogen compound metabolic process//nucleic acid metabolic process//primary metabolic process//heterocycle metabolic process//cellular aromatic compound metabolic process//biological_pr…	--	--	GO:0097159//GO:0003674//GO:0016491//GO:0003824//GO:0005488//GO:0004803//GO:0003677//GO:0003676	organic cyclic compound binding//molecular_function//oxidoreductase activity//catalytic activity//binding//transposase activity//DNA binding//nucleic acid binding
Csa1G005680	hypothetical protein	http://www.genome.jp/dbget-bin/www_bget?csv:101211654	--	--	--	--	--	--
Csa1G005770	--	--	--	--	--	--	--	--
Csa1G007850	transcription factor MYB1R1-like	http://www.genome.jp/dbget-bin/www_bget?csv:101214626	--	--	--	--	GO:0005488//GO:0003677//GO:0003676//GO:0097159//GO:0003674	binding//DNA binding//nucleic acid binding//organic cyclic compound binding//molecular_function
Csa1G007860	serine/threonine-protein kinase AtPK2/AtPK19-like; K04688 p70 ribosomal S6 kinase [EC:2.7.11.1]	http://www.genome.jp/dbget-bin/www_bget?csv:101214867	GO:0009103//GO:0033692//GO:0044249//GO:0044260//GO:0000271//GO:0006796//GO:0044264//GO:0006810//GO:0006793//GO:0008152//GO:0051234//GO:0006468//GO:0043412//GO:0008653//GO:0044238//GO:0034637//GO:0044255//GO:0006464//GO:0051179//GO:0008150//GO:0005975//GO:0043170//GO:0034645//GO:0044237//GO:0006811//GO:0071704//GO:0005976//GO:0044267//GO:0044262//GO:0009059//GO:0006629//GO:0055085//GO:0009987//GO:…	lipopolysaccharide biosynthetic process//cellular polysaccharide biosynthetic process//cellular biosynthetic process//cellular macromolecule metabolic process//polysaccharide biosynthetic process//phosphate-containing compound metabolic process//cellular polysaccharide metabolic process//transport//phosphorus metabolic process//metabolic process//establishment of localization//protein phosphoryla…	GO:0016020//GO:0005575	membrane//cellular_component	GO:0022857//GO:0022838//GO:0016772//GO:0032555//GO:0035639//GO:0016740//GO:0016773//GO:0004674//GO:0015075//GO:0001883//GO:0032549//GO:0022891//GO:0005488//GO:0043167//GO:0005215//GO:0003824//GO:0043168//GO:0016301//GO:0017076//GO:0005216//GO:0000166//GO:0032553//GO:0003674//GO:0032550//GO:0030554//GO:0097159//GO:0001882//GO:0022803//GO:0022892//GO:0032559//GO:0015267//GO:0004672//GO:0005524	transmembrane transporter activity//substrate-specific channel activity//transferase activity, transferring phosphorus-containing groups//purine ribonucleotide binding//purine ribonucleoside triphosphate binding//transferase activity//phosphotransferase activity, alcohol group as acceptor//protein serine/threonine kinase activity//ion transmembrane transporter activity//purine nucleoside binding/…
Csa1G007910	transcription factor bHLH79-like	http://www.genome.jp/dbget-bin/www_bget?csv:101215588	--	--	--	--	--	--
Csa1G008470	uncharacterized LOC101230019	http://www.genome.jp/dbget-bin/www_bget?csv:101230019	GO:0055085//GO:0071840//GO:0051704//GO:0044403//GO:0009987//GO:0019067//GO:0016043//GO:0000003//GO:0044085//GO:0048610//GO:0008150//GO:0051179//GO:0016032//GO:0022607//GO:0019069//GO:0019068//GO:0051234//GO:0044419//GO:0006810//GO:0019058	transmembrane transport//cellular component organization or biogenesis//multi-organism process//symbiosis, encompassing mutualism through parasitism//cellular process//viral assembly, maturation, egress, and release//cellular component organization//reproduction//cellular component biogenesis//cellular process involved in reproduction//biological_process//localization//viral reproduction//cellula…	GO:0016021//GO:0031224//GO:0005575//GO:0044425//GO:0016020	integral to membrane//intrinsic to membrane//cellular_component//membrane part//membrane	GO:0097159//GO:0003674//GO:0000166//GO:0046872//GO:0043167//GO:0043169//GO:0005488	organic cyclic compound binding//molecular_function//nucleotide binding//metal ion binding//ion binding//cation binding//binding
Csa1G008530	probable peptide/nitrate transporter At5g62680-like; K14638 solute carrier family 15 (peptide/histidine transporter), member 3/4	http://www.genome.jp/dbget-bin/www_bget?csv:101217494	GO:0042886//GO:0071705//GO:0015833//GO:0008150//GO:0071702//GO:0051179//GO:0006810//GO:0051234//GO:0006857	amide transport//nitrogen compound transport//peptide transport//biological_process//organic substance transport//localization//transport//establishment of localization//oligopeptide transport	GO:0005575//GO:0016020	cellular_component//membrane	GO:0003674//GO:0005215	molecular_function//transporter activity
Csa1G008570	hypersensitive-induced response protein 1-like	http://www.genome.jp/dbget-bin/www_bget?csv:101230690	--	--	--	--	--	--
Csa1G009590	uncharacterized LOC101218840	http://www.genome.jp/dbget-bin/www_bget?csv:101218840	--	--	--	--	--	--
Csa1G009600	ABC transporter A family member 2-like	http://www.genome.jp/dbget-bin/www_bget?csv:101230018	--	--	GO:0005575//GO:0016020	cellular_component//membrane	GO:0000166//GO:0097159//GO:0001882//GO:0032550//GO:0030554//GO:0003674//GO:0032553//GO:0016887//GO:0043168//GO:0017076//GO:0016462//GO:0005524//GO:0017111//GO:0032559//GO:0016817//GO:0032555//GO:0035639//GO:0043167//GO:0032549//GO:0001883//GO:0005488//GO:0016818//GO:0003824//GO:0016787	nucleotide binding//organic cyclic compound binding//nucleoside binding//purine ribonucleoside binding//adenyl nucleotide binding//molecular_function//ribonucleotide binding//ATPase activity//anion binding//purine nucleotide binding//pyrophosphatase activity//ATP binding//nucleoside-triphosphatase activity//adenyl ribonucleotide binding//hydrolase activity, acting on acid anhydrides//purine ribon…
Csa1G009780	GDSL esterase/lipase At1g74460-like	http://www.genome.jp/dbget-bin/www_bget?csv:101227322	GO:0008150//GO:0044238//GO:0008152//GO:0006629//GO:0071704	biological_process//primary metabolic process//metabolic process//lipid metabolic process//organic substance metabolic process	--	--	GO:0016788//GO:0003824//GO:0016787//GO:0003674//GO:0005198	hydrolase activity, acting on ester bonds//catalytic activity//hydrolase activity//molecular_function//structural molecule activity
Csa1G009790	dof zinc finger protein DOF3.3-like	http://www.genome.jp/dbget-bin/www_bget?csv:101227094	GO:0019438//GO:0046483//GO:0010467//GO:0006807//GO:0044238//GO:0090304//GO:0019222//GO:0031326//GO:0010556//GO:0019219//GO:0032774//GO:0010468//GO:0008150//GO:2001141//GO:0006139//GO:0018130//GO:0060255//GO:0006725//GO:0051252//GO:0080090//GO:0044260//GO:0016070//GO:0044249//GO:0016032//GO:0044419//GO:0008152//GO:0009059//GO:0051704//GO:0044403//GO:0065007//GO:0034641//GO:0009987//GO:0031323//GO:…	aromatic compound biosynthetic process//heterocycle metabolic process//gene expression//nitrogen compound metabolic process//primary metabolic process//nucleic acid metabolic process//regulation of metabolic process//regulation of cellular biosynthetic process//regulation of macromolecule biosynthetic process//regulation of nucleobase-containing compound metabolic process//RNA biosynthetic proces…	--	--	GO:0046872//GO:0005488//GO:0043169//GO:0043167//GO:0003676//GO:0003677//GO:0046914//GO:0008270//GO:0003674//GO:0097159	metal ion binding//binding//cation binding//ion binding//nucleic acid binding//DNA binding//transition metal ion binding//zinc ion binding//molecular_function//organic cyclic compound binding
Csa1G009810	chlorophyll a-b binding protein P4, chloroplastic-like; K08910 light-harvesting complex I chlorophyll a/b binding protein 4	http://www.genome.jp/dbget-bin/www_bget?csv:101225503	--	--	--	--	--	--
Csa1G009840	pentatricopeptide repeat-containing protein At1g59720, mitochondrial-like	http://www.genome.jp/dbget-bin/www_bget?csv:101228238	--	--	--	--	--	--
Csa1G011540	transcription factor bHLH49-like	http://www.genome.jp/dbget-bin/www_bget?csv:101216068	--	--	--	--	--	--
Csa1G014310	transcription factor TCP5-like	http://www.genome.jp/dbget-bin/www_bget?csv:101225050	--	--	--	--	GO:0016779//GO:0017171//GO:0034062//GO:0003674//GO:0070011//GO:0004252//GO:0008234//GO:0004197//GO:0003824//GO:0004175//GO:0008238//GO:0008236//GO:0070008//GO:0016787//GO:0003968//GO:0008233//GO:0016817//GO:0016740//GO:0016772	nucleotidyltransferase activity//serine hydrolase activity//RNA polymerase activity//molecular_function//peptidase activity, acting on L-amino acid peptides//serine-type endopeptidase activity//cysteine-type peptidase activity//cysteine-type endopeptidase activity//catalytic activity//endopeptidase activity//exopeptidase activity//serine-type peptidase activity//serine-type exopeptidase activity/…
Csa1G014490	agmatine deiminase-like; K10536 agmatine deiminase [EC:3.5.3.12]	http://www.genome.jp/dbget-bin/www_bget?csv:101210752	GO:0008150//GO:0030435//GO:0048869//GO:0043934//GO:0048856//GO:0032502//GO:0048646//GO:0009987//GO:0030154//GO:0009653	biological_process//sporulation resulting in formation of a cellular spore//cellular developmental process//sporulation//anatomical structure development//developmental process//anatomical structure formation involved in morphogenesis//cellular process//cell differentiation//anatomical structure morphogenesis	--	--	--	--
Csa1G015040	pentatricopeptide repeat-containing protein At1g18485-like	http://www.genome.jp/dbget-bin/www_bget?csv:101220351	--	--	--	--	--	--
Csa1G015870	--	--	--	--	--	--	--	--
Csa1G021900	uncharacterized LOC101215825	http://www.genome.jp/dbget-bin/www_bget?csv:101215825	--	--	--	--	--	--
Csa1G021940	transcription factor DIVARICATA-like	http://www.genome.jp/dbget-bin/www_bget?csv:101217344	--	--	--	--	GO:0005488//GO:0003677//GO:0003676//GO:0097159//GO:0003674	binding//DNA binding//nucleic acid binding//organic cyclic compound binding//molecular_function
Csa1G022490	protein ASPARTIC PROTEASE IN GUARD CELL 1-like	http://www.genome.jp/dbget-bin/www_bget?csv:101218526	GO:0071704//GO:0043170//GO:0019538//GO:0006508//GO:0008152//GO:0008150//GO:0044238	organic substance metabolic process//macromolecule metabolic process//protein metabolic process//proteolysis//metabolic process//biological_process//primary metabolic process	--	--	GO:0003674//GO:0070001//GO:0070011//GO:0004190//GO:0008233//GO:0003824//GO:0004175//GO:0016787	molecular_function//aspartic-type peptidase activity//peptidase activity, acting on L-amino acid peptides//aspartic-type endopeptidase activity//peptidase activity//catalytic activity//endopeptidase activity//hydrolase activity
Csa1G022530	uncharacterized LOC101229322	http://www.genome.jp/dbget-bin/www_bget?csv:101229322	--	--	--	--	--	--
Csa1G023040	carbon catabolite repressor protein 4 homolog 5-like	http://www.genome.jp/dbget-bin/www_bget?csv:101203382	--	--	--	--	--	--
Csa1G023080	uncharacterized LOC101203868	http://www.genome.jp/dbget-bin/www_bget?csv:101203868	GO:0051716//GO:0050789//GO:0050794//GO:0007218//GO:0009987//GO:0065007//GO:0023052//GO:0007186//GO:0051234//GO:0006810//GO:0008643//GO:0007165//GO:0007166//GO:0007154//GO:0050896//GO:0051179//GO:0071702//GO:0008150	cellular response to stimulus//regulation of biological process//regulation of cellular process//neuropeptide signaling pathway//cellular process//biological regulation//signaling//G-protein coupled receptor signaling pathway//establishment of localization//transport//carbohydrate transport//signal transduction//cell surface receptor linked signaling pathway//cell communication//response to stimu…	GO:0005575//GO:0005623//GO:0042597//GO:0044464	cellular_component//cell//periplasmic space//cell part	--	--
Csa1G023600	chloroplastic group IIA intron splicing facilitator CRS1, chloroplastic-like	http://www.genome.jp/dbget-bin/www_bget?csv:101219948	GO:0031325//GO:0065007//GO:0031329//GO:0009059//GO:0010506//GO:2000112//GO:0034654//GO:0009893//GO:0009889//GO:0009987//GO:0034641//GO:0009058//GO:0031323//GO:0050794//GO:0044271//GO:0034645//GO:0043170//GO:0006355//GO:0050789//GO:0006351//GO:0044237//GO:0009896//GO:0044248//GO:0010508//GO:0051171//GO:0071704//GO:0019222//GO:0006914//GO:0031331//GO:0010467//GO:0019438//GO:0046483//GO:0044238//GO:…	positive regulation of cellular metabolic process//biological regulation//regulation of cellular catabolic process//macromolecule biosynthetic process//regulation of autophagy//regulation of cellular macromolecule biosynthetic process//nucleobase-containing compound biosynthetic process//positive regulation of metabolic process//regulation of biosynthetic process//cellular process//cellular nitro…	GO:0019033//GO:0005575//GO:0019012//GO:0044423	viral tegument//cellular_component//virion//virion part	GO:0003674//GO:0097159//GO:0005488//GO:0003723//GO:0003676//GO:0003677	molecular_function//organic cyclic compound binding//binding//RNA binding//nucleic acid binding//DNA binding
Csa1G024900	MATE efflux family protein 7-like; K03327 multidrug resistance protein, MATE family	http://www.genome.jp/dbget-bin/www_bget?csv:101217888	GO:0042221//GO:0051179//GO:0050896//GO:0008150//GO:0006855//GO:0051234//GO:0006810//GO:0055085//GO:0042493//GO:0009987//GO:0015893	response to chemical stimulus//localization//response to stimulus//biological_process//drug transmembrane transport//establishment of localization//transport//transmembrane transport//response to drug//cellular process//drug transport	GO:0016020//GO:0005575	membrane//cellular_component	GO:0022804//GO:0015297//GO:0005215//GO:0022857//GO:0015291//GO:0015238//GO:0003674	active transmembrane transporter activity//antiporter activity//transporter activity//transmembrane transporter activity//secondary active transmembrane transporter activity//drug transmembrane transporter activity//molecular_function
Csa1G024920	alpha-dioxygenase 2-like	http://www.genome.jp/dbget-bin/www_bget?csv:101218599	GO:0008150//GO:0050896//GO:0006979//GO:0055114//GO:0008152//GO:0006950	biological_process//response to stimulus//response to oxidative stress//oxidation-reduction process//metabolic process//response to stress	GO:0005576//GO:0005575	extracellular region//cellular_component	GO:0003824//GO:0061134//GO:0005488//GO:0030414//GO:0020037//GO:0046906//GO:0016491//GO:0004601//GO:0004866//GO:0004867//GO:0030234//GO:0061135//GO:0016209//GO:0097159//GO:0003674//GO:0016684//GO:0004857	catalytic activity//peptidase regulator activity//binding//peptidase inhibitor activity//heme binding//tetrapyrrole binding//oxidoreductase activity//peroxidase activity//endopeptidase inhibitor activity//serine-type endopeptidase inhibitor activity//enzyme regulator activity//endopeptidase regulator activity//antioxidant activity//organic cyclic compound binding//molecular_function//oxidoreducta…
Csa1G025020	probable calcium-binding protein CML27-like; K13448 calcium-binding protein CML	http://www.genome.jp/dbget-bin/www_bget?csv:101220025	GO:0007165//GO:0008150//GO:0050896//GO:0007154//GO:0050789//GO:0051716//GO:0050794//GO:0009987//GO:0023052//GO:0065007	signal transduction//biological_process//response to stimulus//cell communication//regulation of biological process//cellular response to stimulus//regulation of cellular process//cellular process//signaling//biological regulation	GO:0044421//GO:0005578//GO:0031012//GO:0005575//GO:0005576	extracellular region part//proteinaceous extracellular matrix//extracellular matrix//cellular_component//extracellular region	GO:0005488//GO:0005509//GO:0043169//GO:0043167//GO:0046872//GO:0003674	binding//calcium ion binding//cation binding//ion binding//metal ion binding//molecular_function
Csa1G025050	phosphoethanolamine N-methyltransferase 1-like; K05929 phosphoethanolamine N-methyltransferase [EC:2.1.1.103]	http://www.genome.jp/dbget-bin/www_bget?csv:101220498	GO:0006629//GO:0002097//GO:0071840//GO:0043414//GO:0032259//GO:0044403//GO:0051704//GO:0019538//GO:0008610//GO:0009058//GO:0034641//GO:0009987//GO:0016051//GO:0043170//GO:0006364//GO:0005975//GO:0044267//GO:0002098//GO:0071704//GO:0044085//GO:0016072//GO:0006479//GO:0009451//GO:0044237//GO:0001510//GO:0022613//GO:0090304//GO:0044238//GO:0006807//GO:0010467//GO:0046483//GO:0043412//GO:0006725//GO:…	lipid metabolic process//tRNA wobble base modification//cellular component organization or biogenesis//macromolecule methylation//methylation//symbiosis, encompassing mutualism through parasitism//multi-organism process//protein metabolic process//lipid biosynthetic process//biosynthetic process//cellular nitrogen compound metabolic process//cellular process//carbohydrate biosynthetic process//ma…	GO:0005623//GO:0044424//GO:0005575//GO:0005622//GO:0005737//GO:0044464	cell//intracellular part//cellular_component//intracellular//cytoplasm//cell part	GO:0016300//GO:0008649//GO:0016423//GO:0008276//GO:0008176//GO:0008173//GO:0042054//GO:0008168//GO:0000179//GO:0018024//GO:0008170//GO:0016433//GO:0097159//GO:0008757//GO:0003674//GO:0008171//GO:0051998//GO:0008175//GO:0016278//GO:0003824//GO:0005488//GO:0016741//GO:0004719//GO:0016279//GO:0016740//GO:0003676//GO:0010340	tRNA (uracil) methyltransferase activity//rRNA methyltransferase activity//tRNA (guanine) methyltransferase activity//protein methyltransferase activity//tRNA (guanine-N7-)-methyltransferase activity//RNA methyltransferase activity//histone methyltransferase activity//methyltransferase activity//rRNA (adenine-N6,N6-)-dimethyltransferase activity//histone-lysine N-methyltransferase activity//N-met…
Csa1G031880	uncharacterized LOC101213338	http://www.genome.jp/dbget-bin/www_bget?csv:101213338	--	--	--	--	--	--
Csa1G032440	uncharacterized LOC101217341	http://www.genome.jp/dbget-bin/www_bget?csv:101217341	--	--	--	--	GO:0003674//GO:0097159//GO:0005488//GO:0003676//GO:0003677	molecular_function//organic cyclic compound binding//binding//nucleic acid binding//DNA binding
Csa1G032450	BTB/POZ and TAZ domain-containing protein 1-like	http://www.genome.jp/dbget-bin/www_bget?csv:101230650	GO:0060255//GO:0051252//GO:0006725//GO:2001141//GO:0008150//GO:0018130//GO:0006139//GO:0010468//GO:0032774//GO:0019219//GO:0010556//GO:0031326//GO:0019222//GO:0006807//GO:0044238//GO:0090304//GO:0046483//GO:0019438//GO:0010467//GO:0008152//GO:0016070//GO:0044260//GO:0044249//GO:0080090//GO:0009889//GO:2000112//GO:0034654//GO:0031323//GO:0009058//GO:0009987//GO:0034641//GO:0065007//GO:0009059//GO:…	regulation of macromolecule metabolic process//regulation of RNA metabolic process//cellular aromatic compound metabolic process//regulation of RNA biosynthetic process//biological_process//heterocycle biosynthetic process//nucleobase-containing compound metabolic process//regulation of gene expression//RNA biosynthetic process//regulation of nucleobase-containing compound metabolic process//regu…	GO:0044464//GO:0043229//GO:0043231//GO:0043227//GO:0043226//GO:0005623//GO:0005634//GO:0044424//GO:0005622//GO:0005575	cell part//intracellular organelle//intracellular membrane-bounded organelle//membrane-bounded organelle//organelle//cell//nucleus//intracellular part//intracellular//cellular_component	GO:0003824//GO:0043167//GO:0005488//GO:0043169//GO:0004402//GO:0046872//GO:0000988//GO:0003712//GO:0016740//GO:0000989//GO:0016410//GO:0008080//GO:0005515//GO:0016747//GO:0016746//GO:0046914//GO:0003674//GO:0008270//GO:0016407	catalytic activity//ion binding//binding//cation binding//histone acetyltransferase activity//metal ion binding//protein binding transcription factor activity//transcription cofactor activity//transferase activity//transcription factor binding transcription factor activity//N-acyltransferase activity//N-acetyltransferase activity//protein binding//transferase activity, transferring acyl groups ot…
Csa1G033080	protein PHYTOCHROME KINASE SUBSTRATE 1-like	http://www.genome.jp/dbget-bin/www_bget?csv:101218524	GO:0008152//GO:0008150	metabolic process//biological_process	--	--	GO:0097159//GO:0003674//GO:0043168//GO:0072341//GO:0019842//GO:0005542//GO:0016740//GO:0031406//GO:0016597//GO:0003824//GO:0043167//GO:0005488	organic cyclic compound binding//molecular_function//anion binding//modified amino acid binding//vitamin binding//folic acid binding//transferase activity//carboxylic acid binding//amino acid binding//catalytic activity//ion binding//binding
Csa1G033120	glutathione S-transferase U9-like; K00799 glutathione S-transferase [EC:2.5.1.18]	http://www.genome.jp/dbget-bin/www_bget?csv:101217019	--	--	--	--	GO:0005488//GO:0003674//GO:0005515	binding//molecular_function//protein binding
Csa1G033190	uncharacterized LOC101217261	http://www.genome.jp/dbget-bin/www_bget?csv:101217261	--	--	--	--	--	--
Csa1G033200	myb-related protein 306-like; K09422 myb proto-oncogene protein, plant	http://www.genome.jp/dbget-bin/www_bget?csv:101217491	--	--	--	--	GO:0003674//GO:0097159//GO:0003676//GO:0003677//GO:0005488	molecular_function//organic cyclic compound binding//nucleic acid binding//DNA binding//binding
Csa1G033240	--	--	--	--	--	--	--	--
Csa1G033250	dof zinc finger protein DOF3.3-like	http://www.genome.jp/dbget-bin/www_bget?csv:101219706	GO:0050789//GO:0071704//GO:0051171//GO:0044237//GO:0006351//GO:0043170//GO:0034645//GO:0044271//GO:0050794//GO:0006355//GO:0009889//GO:0034654//GO:2000112//GO:0031323//GO:0009058//GO:0034641//GO:0009987//GO:0065007//GO:0009059//GO:0008152//GO:0016070//GO:0044260//GO:0044249//GO:0080090//GO:0060255//GO:0006725//GO:0051252//GO:0008150//GO:2001141//GO:0006139//GO:0018130//GO:0010468//GO:0032774//GO:…	regulation of biological process//organic substance metabolic process//regulation of nitrogen compound metabolic process//cellular metabolic process//transcription, DNA-dependent//macromolecule metabolic process//cellular macromolecule biosynthetic process//cellular nitrogen compound biosynthetic process//regulation of cellular process//regulation of transcription, DNA-dependent//regulation of bi…	--	--	GO:0097159//GO:0003674//GO:0008270//GO:0005515//GO:0046914//GO:0003677//GO:0003676//GO:0043167//GO:0005488//GO:0043169//GO:0046872	organic cyclic compound binding//molecular_function//zinc ion binding//protein binding//transition metal ion binding//DNA binding//nucleic acid binding//ion binding//binding//cation binding//metal ion binding
Csa1G038320	thioredoxin-like 1-1, chloroplastic-like	http://www.genome.jp/dbget-bin/www_bget?csv:101226621	GO:0065007//GO:0019725//GO:0042592//GO:0045454//GO:0009987//GO:0050794//GO:0050789//GO:0008150//GO:0065008	biological regulation//cellular homeostasis//homeostatic process//cell redox homeostasis//cellular process//regulation of cellular process//regulation of biological process//biological_process//regulation of biological quality	--	--	--	--
Csa1G038340	NAC domain-containing protein 100-like	http://www.genome.jp/dbget-bin/www_bget?csv:101220421	GO:0065007//GO:0009059//GO:0034654//GO:2000112//GO:0009889//GO:0034641//GO:0009987//GO:0009058//GO:0031323//GO:0050794//GO:0044271//GO:0043170//GO:0034645//GO:0006355//GO:0050789//GO:0006351//GO:0044237//GO:0051171//GO:0071704//GO:0019222//GO:0010467//GO:0019438//GO:0046483//GO:0044238//GO:0090304//GO:0006807//GO:0006139//GO:0018130//GO:0008150//GO:2001141//GO:0006725//GO:0051252//GO:0060255//GO:…	biological regulation//macromolecule biosynthetic process//nucleobase-containing compound biosynthetic process//regulation of cellular macromolecule biosynthetic process//regulation of biosynthetic process//cellular nitrogen compound metabolic process//cellular process//biosynthetic process//regulation of cellular metabolic process//regulation of cellular process//cellular nitrogen compound biosy…	--	--	GO:0003674//GO:0097159//GO:0005488//GO:0003676//GO:0003677	molecular_function//organic cyclic compound binding//binding//nucleic acid binding//DNA binding
Csa1G038380	two-component response regulator-like APRR1-like; K12127 pseudo-response regulator 1	http://www.genome.jp/dbget-bin/www_bget?csv:101220107	GO:0007165//GO:0016070//GO:0044260//GO:0044249//GO:0080090//GO:0008152//GO:0019222//GO:0006807//GO:0090304//GO:0044238//GO:0046483//GO:0019438//GO:0010467//GO:0060255//GO:0006725//GO:0051252//GO:0008150//GO:2001141//GO:0006139//GO:0018130//GO:0007154//GO:0010468//GO:0032774//GO:0019219//GO:0031326//GO:0050896//GO:0010556//GO:0043170//GO:0034645//GO:0044271//GO:0050794//GO:0006355//GO:0051716//GO:…	signal transduction//RNA metabolic process//cellular macromolecule metabolic process//cellular biosynthetic process//regulation of primary metabolic process//metabolic process//regulation of metabolic process//nitrogen compound metabolic process//nucleic acid metabolic process//primary metabolic process//heterocycle metabolic process//aromatic compound biosynthetic process//gene expression//regul…	--	--	GO:0000156//GO:0005488//GO:0004871//GO:0003674//GO:0005515//GO:0060089	two-component response regulator activity//binding//signal transducer activity//molecular_function//protein binding//molecular transducer activity
Csa1G039000	transcription factor UNE10-like	http://www.genome.jp/dbget-bin/www_bget?csv:101222307	--	--	GO:0005575//GO:0016020	cellular_component//membrane	GO:0003674//GO:0016772//GO:0016740//GO:0003824	molecular_function//transferase activity, transferring phosphorus-containing groups//transferase activity//catalytic activity
Csa1G039170	uncharacterized LOC101225278	http://www.genome.jp/dbget-bin/www_bget?csv:101225278	GO:0050794//GO:0000160//GO:0051716//GO:0050789//GO:0065007//GO:0023052//GO:0009987//GO:0007165//GO:0042330//GO:0006935//GO:0040011//GO:0009605//GO:0007154//GO:0042221//GO:0050896//GO:0008150	regulation of cellular process//two-component signal transduction system (phosphorelay)//cellular response to stimulus//regulation of biological process//biological regulation//signaling//cellular process//signal transduction//taxis//chemotaxis//locomotion//response to external stimulus//cell communication//response to chemical stimulus//response to stimulus//biological_process	GO:0005575//GO:0005622//GO:0044424//GO:0005623//GO:0005737//GO:0044464	cellular_component//intracellular//intracellular part//cell//cytoplasm//cell part	GO:0004871//GO:0016301//GO:0004673//GO:0016775//GO:0003674//GO:0000155//GO:0016835//GO:0004672//GO:0060089//GO:0018822//GO:0016829//GO:0016772//GO:0016836//GO:0016740//GO:0004872//GO:0016773//GO:0038023//GO:0003824	signal transducer activity//kinase activity//protein histidine kinase activity//phosphotransferase activity, nitrogenous group as acceptor//molecular_function//two-component sensor activity//carbon-oxygen lyase activity//protein kinase activity//molecular transducer activity//nitrile hydratase activity//lyase activity//transferase activity, transferring phosphorus-containing groups//hydro-lyase a…
Csa1G039910	agamous-like MADS-box protein AGL8 homolog; K09264 MADS-box transcription factor, plant	http://www.genome.jp/dbget-bin/www_bget?csv:101207225	GO:0080090//GO:0022610//GO:0044260//GO:0009056//GO:0016070//GO:0044249//GO:0008152//GO:0019438//GO:0046483//GO:0010467//GO:0006914//GO:0006807//GO:0044238//GO:0090304//GO:0007155//GO:0019222//GO:0031326//GO:0010556//GO:0019219//GO:0010468//GO:0032774//GO:0008150//GO:2001141//GO:0006139//GO:0018130//GO:0060255//GO:0006725//GO:0051252//GO:0006355//GO:0050794//GO:0043170//GO:0034645//GO:0044271//GO:…	regulation of primary metabolic process//biological adhesion//cellular macromolecule metabolic process//catabolic process//RNA metabolic process//cellular biosynthetic process//metabolic process//aromatic compound biosynthetic process//heterocycle metabolic process//gene expression//autophagy//nitrogen compound metabolic process//primary metabolic process//nucleic acid metabolic process//cell adh…	GO:0043228//GO:0043226//GO:0043227//GO:0043229//GO:0043231//GO:0044464//GO:0005575//GO:0043232//GO:0005622//GO:0009288//GO:0044424//GO:0005634//GO:0005623	non-membrane-bounded organelle//organelle//membrane-bounded organelle//intracellular organelle//intracellular membrane-bounded organelle//cell part//cellular_component//intracellular non-membrane-bounded organelle//intracellular//bacterial-type flagellum//intracellular part//nucleus//cell	GO:0004527//GO:0016787//GO:0016796//GO:0016895//GO:0005488//GO:0016788//GO:0003700//GO:0003824//GO:0001071//GO:0004518//GO:0004536//GO:0003674//GO:0008855//GO:0005515//GO:0004529//GO:0051082	exonuclease activity//hydrolase activity//exonuclease activity, active with either ribo- or deoxyribonucleic acids and producing 5'-phosphomonoesters//exodeoxyribonuclease activity, producing 5'-phosphomonoesters//binding//hydrolase activity, acting on ester bonds//sequence-specific DNA binding transcription factor activity//catalytic activity//nucleic acid binding transcription factor activity//…
Csa1G039920	uncharacterized LOC101225372	http://www.genome.jp/dbget-bin/www_bget?csv:101225372	GO:0008150//GO:0050896//GO:0006950	biological_process//response to stimulus//response to stress	--	--	--	--
Csa1G042070	putative phospholipid-transporting ATPase 9-like; K01530 phospholipid-translocating ATPase [EC:3.6.3.1]	http://www.genome.jp/dbget-bin/www_bget?csv:101205650	GO:0006260//GO:0046483//GO:0006807//GO:0044238//GO:0090304//GO:0008150//GO:0006139//GO:0006725//GO:0044260//GO:0006259//GO:0044249//GO:0008152//GO:0009059//GO:0034641//GO:0009987//GO:0009058//GO:0043170//GO:0034645//GO:0044237//GO:0071704	DNA replication//heterocycle metabolic process//nitrogen compound metabolic process//primary metabolic process//nucleic acid metabolic process//biological_process//nucleobase-containing compound metabolic process//cellular aromatic compound metabolic process//cellular macromolecule metabolic process//DNA metabolic process//cellular biosynthetic process//metabolic process//macromolecule biosynthet…	GO:0000808//GO:0043229//GO:0043231//GO:0043226//GO:0043227//GO:0044464//GO:0032991//GO:0043234//GO:0005694//GO:0043228//GO:0005634//GO:0005623//GO:0044424//GO:0044427//GO:0005575//GO:0044422//GO:0005622//GO:0043232//GO:0044446	origin recognition complex//intracellular organelle//intracellular membrane-bounded organelle//organelle//membrane-bounded organelle//cell part//macromolecular complex//protein complex//chromosome//non-membrane-bounded organelle//nucleus//cell//intracellular part//chromosomal part//cellular_component//organelle part//intracellular//intracellular non-membrane-bounded organelle//intracellular organ…	GO:0046872//GO:0003824//GO:0005488//GO:0043169//GO:0043167//GO:0003674//GO:0097159//GO:0000166	metal ion binding//catalytic activity//binding//cation binding//ion binding//molecular_function//organic cyclic compound binding//nucleotide binding
Csa1G042160	--	--	--	--	--	--	--	--
Csa1G042210	ATP-dependent Clp protease adapter protein ClpS-like; K06891 ATP-dependent Clp protease adaptor protein ClpS	http://www.genome.jp/dbget-bin/www_bget?csv:101211403	GO:0043170//GO:0071704//GO:0019538//GO:0009057//GO:0030163//GO:0009056//GO:0008152//GO:0044238//GO:0008150	macromolecule metabolic process//organic substance metabolic process//protein metabolic process//macromolecule catabolic process//protein catabolic process//catabolic process//metabolic process//primary metabolic process//biological_process	--	--	GO:0043168//GO:0048037//GO:0097159//GO:0003674//GO:0050662//GO:0019842//GO:0030976//GO:0043167//GO:0043169//GO:0005488	anion binding//cofactor binding//organic cyclic compound binding//molecular_function//coenzyme binding//vitamin binding//thiamine pyrophosphate binding//ion binding//cation binding//binding
Csa1G042220	protein ASPARTIC PROTEASE IN GUARD CELL 1-like	http://www.genome.jp/dbget-bin/www_bget?csv:101211153	GO:0008150//GO:0044238//GO:0008152//GO:0019538//GO:0006508//GO:0071704//GO:0043170	biological_process//primary metabolic process//metabolic process//protein metabolic process//proteolysis//organic substance metabolic process//macromolecule metabolic process	--	--	GO:0003824//GO:0004175//GO:0016787//GO:0008233//GO:0003674//GO:0070001//GO:0070011//GO:0004190	catalytic activity//endopeptidase activity//hydrolase activity//peptidase activity//molecular_function//aspartic-type peptidase activity//peptidase activity, acting on L-amino acid peptides//aspartic-type endopeptidase activity
Csa1G042250	aspartic proteinase Asp1-like	http://www.genome.jp/dbget-bin/www_bget?csv:101212372	GO:0008152//GO:0044238//GO:0008150//GO:0043170//GO:0071704//GO:0019538//GO:0006508	metabolic process//primary metabolic process//biological_process//macromolecule metabolic process//organic substance metabolic process//protein metabolic process//proteolysis	GO:0043231//GO:0043229//GO:0043226//GO:0043227//GO:0044464//GO:0005575//GO:0005622//GO:0005634//GO:0005623//GO:0044424	intracellular membrane-bounded organelle//intracellular organelle//organelle//membrane-bounded organelle//cell part//cellular_component//intracellular//nucleus//cell//intracellular part	GO:0016740//GO:0016757//GO:0008233//GO:0016787//GO:0003824//GO:0004175//GO:0070011//GO:0004190//GO:0016763//GO:0003950//GO:0003674//GO:0070001	transferase activity//transferase activity, transferring glycosyl groups//peptidase activity//hydrolase activity//catalytic activity//endopeptidase activity//peptidase activity, acting on L-amino acid peptides//aspartic-type endopeptidase activity//transferase activity, transferring pentosyl groups//NAD+ ADP-ribosyltransferase activity//molecular_function//aspartic-type peptidase activity
Csa1G042290	ethylene-responsive transcription factor CRF4-like	http://www.genome.jp/dbget-bin/www_bget?csv:101212855	GO:0065007//GO:0009059//GO:0034654//GO:2000112//GO:0009889//GO:0034641//GO:0009987//GO:0009058//GO:0031323//GO:0050794//GO:0044271//GO:0043170//GO:0034645//GO:0006355//GO:0050789//GO:0006351//GO:0044237//GO:0071704//GO:0051171//GO:0019222//GO:0010467//GO:0019438//GO:0046483//GO:0090304//GO:0044238//GO:0006807//GO:0006139//GO:0018130//GO:0008150//GO:2001141//GO:0006725//GO:0051252//GO:0060255//GO:…	biological regulation//macromolecule biosynthetic process//nucleobase-containing compound biosynthetic process//regulation of cellular macromolecule biosynthetic process//regulation of biosynthetic process//cellular nitrogen compound metabolic process//cellular process//biosynthetic process//regulation of cellular metabolic process//regulation of cellular process//cellular nitrogen compound biosy…	--	--	GO:0001071//GO:0003674//GO:0046872//GO:0043169//GO:0005488//GO:0043167//GO:0003700	nucleic acid binding transcription factor activity//molecular_function//metal ion binding//cation binding//binding//ion binding//sequence-specific DNA binding transcription factor activity
Csa1G042670	uncharacterized LOC101208302	http://www.genome.jp/dbget-bin/www_bget?csv:101208302	--	--	--	--	GO:0031072//GO:0005488//GO:0003674//GO:0005515	heat shock protein binding//binding//molecular_function//protein binding
Csa1G042710	laccase-1-like; K05909 laccase [EC:1.10.3.2]	http://www.genome.jp/dbget-bin/www_bget?csv:101208781	GO:0055114//GO:0008152//GO:0008150	oxidation-reduction process//metabolic process//biological_process	--	--	GO:0016491//GO:0046872//GO:0005488//GO:0043169//GO:0043167//GO:0003824//GO:0005507//GO:0003674//GO:0046914	oxidoreductase activity//metal ion binding//binding//cation binding//ion binding//catalytic activity//copper ion binding//molecular_function//transition metal ion binding
Csa1G042720	mitogen-activated protein kinase 9-like; K04371 mitogen-activated protein kinase 1/3 [EC:2.7.11.24]	http://www.genome.jp/dbget-bin/www_bget?csv:101227678	GO:0044264//GO:0000271//GO:0006796//GO:0006468//GO:0008152//GO:0006793//GO:0033692//GO:0009103//GO:0044260//GO:0044249//GO:0006464//GO:0008150//GO:0034637//GO:0044238//GO:0043412//GO:0008653//GO:0044255//GO:0071704//GO:0044237//GO:0044262//GO:0044267//GO:0005976//GO:0005975//GO:0043170//GO:0034645//GO:0009058//GO:0016051//GO:0009987//GO:0016310//GO:0008610//GO:0019538//GO:0009059//GO:0006629	cellular polysaccharide metabolic process//polysaccharide biosynthetic process//phosphate-containing compound metabolic process//protein phosphorylation//metabolic process//phosphorus metabolic process//cellular polysaccharide biosynthetic process//lipopolysaccharide biosynthetic process//cellular macromolecule metabolic process//cellular biosynthetic process//protein modification process//biolog…	GO:0016020//GO:0005575	membrane//cellular_component	GO:0016740//GO:0016772//GO:0032555//GO:0035639//GO:0043167//GO:0005488//GO:0032549//GO:0001883//GO:0003824//GO:0016773//GO:0000166//GO:0097159//GO:0001882//GO:0030554//GO:0032550//GO:0003674//GO:0032553//GO:0043168//GO:0017076//GO:0016301//GO:0005524//GO:0004672//GO:0032559	transferase activity//transferase activity, transferring phosphorus-containing groups//purine ribonucleotide binding//purine ribonucleoside triphosphate binding//ion binding//binding//ribonucleoside binding//purine nucleoside binding//catalytic activity//phosphotransferase activity, alcohol group as acceptor//nucleotide binding//organic cyclic compound binding//nucleoside binding//adenyl nucleoti…
Csa1G042740	peptidyl-prolyl cis-trans isomerase FKBP17-2, chloroplastic-like	http://www.genome.jp/dbget-bin/www_bget?csv:101218914	GO:0008152//GO:0044260//GO:0044249//GO:0006259//GO:0006457//GO:0008150//GO:0006139//GO:0006725//GO:0006260//GO:0046483//GO:0006807//GO:0090304//GO:0044238//GO:0044267//GO:0044237//GO:0071704//GO:0034645//GO:0043170//GO:0019538//GO:0009987//GO:0034641//GO:0009058//GO:0009059	metabolic process//cellular macromolecule metabolic process//cellular biosynthetic process//DNA metabolic process//protein folding//biological_process//nucleobase-containing compound metabolic process//cellular aromatic compound metabolic process//DNA replication//heterocycle metabolic process//nitrogen compound metabolic process//nucleic acid metabolic process//primary metabolic process//cellula…	GO:0044454//GO:0043228//GO:0044428//GO:0005694//GO:0044464//GO:0070013//GO:0032991//GO:0043234//GO:0000808//GO:0043229//GO:0031981//GO:0043231//GO:0043233//GO:0043227//GO:0043226//GO:0043232//GO:0005622//GO:0044446//GO:0005575//GO:0044422//GO:0005634//GO:0005623//GO:0005664//GO:0044427//GO:0044424//GO:0000228//GO:0031974	nuclear chromosome part//non-membrane-bounded organelle//nuclear part//chromosome//cell part//intracellular organelle lumen//macromolecular complex//protein complex//origin recognition complex//intracellular organelle//nuclear lumen//intracellular membrane-bounded organelle//organelle lumen//membrane-bounded organelle//organelle//intracellular non-membrane-bounded organelle//intracellular//intrac…	GO:0003676//GO:0003677//GO:0005488//GO:0003674//GO:0097159	nucleic acid binding//DNA binding//binding//molecular_function//organic cyclic compound binding
Csa1G042750	uncharacterized LOC101219154	http://www.genome.jp/dbget-bin/www_bget?csv:101219154	GO:0008152//GO:0043687//GO:0008213//GO:0044260//GO:0008150//GO:0006464//GO:0043412//GO:0044238//GO:0044267//GO:0006479//GO:0044237//GO:0071704//GO:0043170//GO:0018410//GO:0019538//GO:0009987//GO:0043414//GO:0006481//GO:0006629//GO:0032259	metabolic process//post-translational protein modification//protein alkylation//cellular macromolecule metabolic process//biological_process//protein modification process//macromolecule modification//primary metabolic process//cellular protein metabolic process//protein methylation//cellular metabolic process//organic substance metabolic process//macromolecule metabolic process//C-terminal protei…	GO:0016020//GO:0044464//GO:0005737//GO:0044425//GO:0005622//GO:0031224//GO:0005575//GO:0005623//GO:0044424//GO:0016021	membrane//cell part//cytoplasm//membrane part//intracellular//intrinsic to membrane//cellular_component//cell//intracellular part//integral to membrane	GO:0016740//GO:0010340//GO:0003880//GO:0003824//GO:0016627//GO:0016741//GO:0051998//GO:0016491//GO:0003674//GO:0008757//GO:0008171//GO:0008168//GO:0008276//GO:0004671	transferase activity//carboxyl-O-methyltransferase activity//protein C-terminal carboxyl O-methyltransferase activity//catalytic activity//oxidoreductase activity, acting on the CH-CH group of donors//transferase activity, transferring one-carbon groups//protein carboxyl O-methyltransferase activity//oxidoreductase activity//molecular_function//S-adenosylmethionine-dependent methyltransferase act…
Csa1G042980	mitogen-activated protein kinase kinase 4-like	http://www.genome.jp/dbget-bin/www_bget?csv:101203133	GO:0071704//GO:0044237//GO:0044262//GO:0044267//GO:0005976//GO:0005975//GO:0043170//GO:0034645//GO:0009058//GO:0016051//GO:0009987//GO:0016310//GO:0008610//GO:0019538//GO:0009059//GO:0006629//GO:0044264//GO:0000271//GO:0006796//GO:0006468//GO:0008152//GO:0006793//GO:0033692//GO:0009103//GO:0044260//GO:0044249//GO:0006464//GO:0008150//GO:0034637//GO:0044238//GO:0043412//GO:0008653//GO:0044255	organic substance metabolic process//cellular metabolic process//cellular carbohydrate metabolic process//cellular protein metabolic process//polysaccharide metabolic process//carbohydrate metabolic process//macromolecule metabolic process//cellular macromolecule biosynthetic process//biosynthetic process//carbohydrate biosynthetic process//cellular process//phosphorylation//lipid biosynthetic pr…	GO:0005575//GO:0016020	cellular_component//membrane	GO:0000166//GO:0097159//GO:0001882//GO:0032550//GO:0003674//GO:0030554//GO:0032553//GO:0043168//GO:0017076//GO:0016301//GO:0005524//GO:0004672//GO:0032559//GO:0016740//GO:0016772//GO:0032555//GO:0035639//GO:0043167//GO:0005488//GO:0032549//GO:0001883//GO:0003824//GO:0016773	nucleotide binding//organic cyclic compound binding//nucleoside binding//purine ribonucleoside binding//molecular_function//adenyl nucleotide binding//ribonucleotide binding//anion binding//purine nucleotide binding//kinase activity//ATP binding//protein kinase activity//adenyl ribonucleotide binding//transferase activity//transferase activity, transferring phosphorus-containing groups//purine ri…
Csa1G043010	monoglyceride lipase-like	http://www.genome.jp/dbget-bin/www_bget?csv:101210503	GO:0019538//GO:0006508//GO:0071704//GO:0043170//GO:0008150//GO:0044238//GO:0008152	protein metabolic process//proteolysis//organic substance metabolic process//macromolecule metabolic process//biological_process//primary metabolic process//metabolic process	--	--	GO:0017171//GO:0003674//GO:0004177//GO:0070011//GO:0003824//GO:0008236//GO:0008238//GO:0016787//GO:0008233	serine hydrolase activity//molecular_function//aminopeptidase activity//peptidase activity, acting on L-amino acid peptides//catalytic activity//serine-type peptidase activity//exopeptidase activity//hydrolase activity//peptidase activity
Csa1G043160	probable metal-nicotianamine transporter YSL7-like	http://www.genome.jp/dbget-bin/www_bget?csv:101211969	GO:0006810//GO:0051234//GO:0051179//GO:0008150//GO:0009987//GO:0055085	transport//establishment of localization//localization//biological_process//cellular process//transmembrane transport	--	--	--	--
Csa1G043250	uncharacterized LOC101207897	http://www.genome.jp/dbget-bin/www_bget?csv:101207897	GO:0050794//GO:0050789//GO:0065007//GO:0007050//GO:0007049//GO:0051726//GO:0048519//GO:0009987//GO:0045786//GO:0022402//GO:0048523//GO:0008150	regulation of cellular process//regulation of biological process//biological regulation//cell cycle arrest//cell cycle//regulation of cell cycle//negative regulation of biological process//cellular process//negative regulation of cell cycle//cell cycle process//negative regulation of cellular process//biological_process	--	--	--	--
Csa1G043320	hypothetical protein	http://www.genome.jp/dbget-bin/www_bget?csv:101209104	--	--	--	--	GO:0043168//GO:0003674//GO:0008289//GO:0005515//GO:0005543//GO:0005488//GO:0043167	anion binding//molecular_function//lipid binding//protein binding//phospholipid binding//binding//ion binding
Csa1G044320	uncharacterized LOC101213420	http://www.genome.jp/dbget-bin/www_bget?csv:101213420	--	--	--	--	--	--
Csa1G044820	ABC transporter G family member 11-like	http://www.genome.jp/dbget-bin/www_bget?csv:101230225	--	--	GO:0016020//GO:0005575	membrane//cellular_component	GO:0016787//GO:0001883//GO:0032549//GO:0005488//GO:0043167//GO:0016818//GO:0003824//GO:0032555//GO:0035639//GO:0016817//GO:0017111//GO:0032559//GO:0005524//GO:0043168//GO:0016887//GO:0016462//GO:0017076//GO:0000166//GO:0032553//GO:0030554//GO:0032550//GO:0003674//GO:0001882//GO:0097159	hydrolase activity//purine nucleoside binding//ribonucleoside binding//binding//ion binding//hydrolase activity, acting on acid anhydrides, in phosphorus-containing anhydrides//catalytic activity//purine ribonucleotide binding//purine ribonucleoside triphosphate binding//hydrolase activity, acting on acid anhydrides//nucleoside-triphosphatase activity//adenyl ribonucleotide binding//ATP binding//…
Csa1G044870	protein TRANSPARENT TESTA 12-like; K03327 multidrug resistance protein, MATE family	http://www.genome.jp/dbget-bin/www_bget?csv:101213233	GO:0051234//GO:0006810//GO:0006855//GO:0008150//GO:0042221//GO:0050896//GO:0051179//GO:0042493//GO:0055085//GO:0015893//GO:0009987	establishment of localization//transport//drug transmembrane transport//biological_process//response to chemical stimulus//response to stimulus//localization//response to drug//transmembrane transport//drug transport//cellular process	GO:0016020//GO:0005575	membrane//cellular_component	GO:0022857//GO:0022804//GO:0005215//GO:0015297//GO:0015238//GO:0003674//GO:0015291	transmembrane transporter activity//active transmembrane transporter activity//transporter activity//antiporter activity//drug transmembrane transporter activity//molecular_function//secondary active transmembrane transporter activity
Csa1G045540	uncharacterized LOC101214681	http://www.genome.jp/dbget-bin/www_bget?csv:101214681	GO:0019222//GO:0009891//GO:0090304//GO:0044238//GO:0006807//GO:0010467//GO:0046483//GO:0045893//GO:0019438//GO:0051252//GO:0048522//GO:0048518//GO:0006725//GO:0060255//GO:0018130//GO:0006139//GO:2001141//GO:0010557//GO:0008150//GO:0010468//GO:0032774//GO:0019219//GO:0051254//GO:0010556//GO:0031326//GO:0045935//GO:0044249//GO:0016070//GO:0044260//GO:0051173//GO:0080090//GO:0008152//GO:0065007//GO:…	regulation of metabolic process//positive regulation of biosynthetic process//nucleic acid metabolic process//primary metabolic process//nitrogen compound metabolic process//gene expression//heterocycle metabolic process//positive regulation of transcription, DNA-dependent//aromatic compound biosynthetic process//regulation of RNA metabolic process//positive regulation of cellular process//positi…	--	--	GO:0005488//GO:0003677//GO:0003676//GO:0046983//GO:0005515//GO:0097159//GO:0003674	binding//DNA binding//nucleic acid binding//protein dimerization activity//protein binding//organic cyclic compound binding//molecular_function
Csa1G045550	homeobox-leucine zipper protein HAT5-like; K09338 homeobox-leucine zipper protein	http://www.genome.jp/dbget-bin/www_bget?csv:101215160	GO:0008152//GO:0080090//GO:0044249//GO:0016070//GO:0044260//GO:0010468//GO:0032774//GO:0019219//GO:0010556//GO:0031326//GO:0051252//GO:0006725//GO:0060255//GO:0018130//GO:0006139//GO:2001141//GO:0008150//GO:0044238//GO:0090304//GO:0006807//GO:0010467//GO:0046483//GO:0019438//GO:0019222//GO:0051171//GO:0071704//GO:0044237//GO:0006351//GO:0050789//GO:0006355//GO:0044271//GO:0034645//GO:0043170//GO:…	metabolic process//regulation of primary metabolic process//cellular biosynthetic process//RNA metabolic process//cellular macromolecule metabolic process//regulation of gene expression//RNA biosynthetic process//regulation of nucleobase-containing compound metabolic process//regulation of macromolecule biosynthetic process//regulation of cellular biosynthetic process//regulation of RNA metabolic…	GO:0044464//GO:0043227//GO:0043226//GO:0043231//GO:0043229//GO:0005622//GO:0005575//GO:0044424//GO:0005623//GO:0005634	cell part//membrane-bounded organelle//organelle//intracellular membrane-bounded organelle//intracellular organelle//intracellular//cellular_component//intracellular part//cell//nucleus	GO:0003677//GO:0003676//GO:0003700//GO:0005488//GO:0097159//GO:0003674//GO:0001071//GO:0043565//GO:0005515	DNA binding//nucleic acid binding//sequence-specific DNA binding transcription factor activity//binding//organic cyclic compound binding//molecular_function//nucleic acid binding transcription factor activity//sequence-specific DNA binding//protein binding
Csa1G045670	uncharacterized LOC101216763; K08900 mitochondrial chaperone BCS1	http://www.genome.jp/dbget-bin/www_bget?csv:101216763	GO:0046148//GO:0051186//GO:0044249//GO:0006259//GO:0044260//GO:0006281//GO:0042440//GO:0008152//GO:0015994//GO:0019438//GO:0046483//GO:0044238//GO:0090304//GO:0006807//GO:0050896//GO:0006779//GO:0018130//GO:0006139//GO:0008150//GO:0006974//GO:0006725//GO:0051188//GO:0006950//GO:0033013//GO:0044271//GO:0006778//GO:0043170//GO:0044237//GO:0071704//GO:0051716//GO:0033554//GO:0015995//GO:0006310//GO:…	pigment biosynthetic process//cofactor metabolic process//cellular biosynthetic process//DNA metabolic process//cellular macromolecule metabolic process//DNA repair//pigment metabolic process//metabolic process//chlorophyll metabolic process//aromatic compound biosynthetic process//heterocycle metabolic process//primary metabolic process//nucleic acid metabolic process//nitrogen compound metaboli…	GO:0016020//GO:0031224//GO:0005575//GO:0044425//GO:0016021	membrane//intrinsic to membrane//cellular_component//membrane part//integral to membrane	GO:0003678//GO:0035639//GO:0032555//GO:0003723//GO:0003676//GO:0016817//GO:0051003//GO:0016874//GO:0004386//GO:0016787//GO:0032549//GO:0001883//GO:0005488//GO:0043167//GO:0016818//GO:0003824//GO:0009378//GO:0043168//GO:0016887//GO:0003724//GO:0016462//GO:0017076//GO:0000166//GO:0030554//GO:0032550//GO:0003674//GO:0032553//GO:0016851//GO:0097159//GO:0001882//GO:0017111//GO:0032559//GO:0051002//GO:…	DNA helicase activity//purine ribonucleoside triphosphate binding//purine ribonucleotide binding//RNA binding//nucleic acid binding//hydrolase activity, acting on acid anhydrides//ligase activity, forming nitrogen-metal bonds, forming coordination complexes//ligase activity//helicase activity//hydrolase activity//ribonucleoside binding//purine nucleoside binding//binding//ion binding//hydrolase a…
Csa1G045720	--	--	--	--	--	--	--	--
Csa1G045730	transcription factor MYB1R1-like	http://www.genome.jp/dbget-bin/www_bget?csv:101217469	--	--	--	--	GO:0003677//GO:0003676//GO:0005488//GO:0097159//GO:0003674	DNA binding//nucleic acid binding//binding//organic cyclic compound binding//molecular_function
Csa1G045800	pentatricopeptide repeat-containing protein At1g74900, mitochondrial-like	http://www.genome.jp/dbget-bin/www_bget?csv:101218969	--	--	--	--	--	--
Csa1G045920	RING-H2 finger protein ATL48-like	http://www.genome.jp/dbget-bin/www_bget?csv:101220872	--	--	--	--	--	--
Csa1G045930	ubiquitin-conjugating enzyme E2 5-like; K10576 ubiquitin-conjugating enzyme E2 H [EC:6.3.2.19]	http://www.genome.jp/dbget-bin/www_bget?csv:101221105	--	--	--	--	GO:0016881//GO:0003674//GO:0003824//GO:0016879//GO:0016874	acid-amino acid ligase activity//molecular_function//catalytic activity//ligase activity, forming carbon-nitrogen bonds//ligase activity
Csa1G045940	RING-H2 finger protein ATL46-like	http://www.genome.jp/dbget-bin/www_bget?csv:101224539	--	--	GO:0000152//GO:0043231//GO:0043229//GO:0043227//GO:0043226//GO:0044464//GO:0032991//GO:0043234//GO:0044428//GO:0005680//GO:0005634//GO:0005623//GO:0000151//GO:0044424//GO:0031461//GO:0005575//GO:0044422//GO:0005622//GO:0044446	nuclear ubiquitin ligase complex//intracellular membrane-bounded organelle//intracellular organelle//membrane-bounded organelle//organelle//cell part//macromolecular complex//protein complex//nuclear part//anaphase-promoting complex//nucleus//cell//ubiquitin ligase complex//intracellular part//cullin-RING ubiquitin ligase complex//cellular_component//organelle part//intracellular//intracellular o…	GO:0046872//GO:0003824//GO:0019787//GO:0043169//GO:0005488//GO:0043167//GO:0004842//GO:0016879//GO:0003676//GO:0016874//GO:0046914//GO:0016881//GO:0003674//GO:0097159//GO:0008270	metal ion binding//catalytic activity//small conjugating protein ligase activity//cation binding//binding//ion binding//ubiquitin-protein ligase activity//ligase activity, forming carbon-nitrogen bonds//nucleic acid binding//ligase activity//transition metal ion binding//acid-amino acid ligase activity//molecular_function//organic cyclic compound binding//zinc ion binding
Csa1G046110	probable boron transporter 2-like	http://www.genome.jp/dbget-bin/www_bget?csv:101231009	GO:0006811//GO:0009987//GO:0051704//GO:0006810//GO:0051234//GO:0006820//GO:0008150//GO:0051179//GO:0000746	ion transport//cellular process//multi-organism process//transport//establishment of localization//anion transport//biological_process//localization//conjugation	GO:0044425//GO:0005575//GO:0031224//GO:0016021//GO:0016020	membrane part//cellular_component//intrinsic to membrane//integral to membrane//membrane	GO:0003674//GO:0004252//GO:0070011//GO:0005125//GO:0005515//GO:0017171//GO:0008233//GO:0005102//GO:0003824//GO:0005488//GO:0004175//GO:0008236//GO:0016787	molecular_function//serine-type endopeptidase activity//peptidase activity, acting on L-amino acid peptides//cytokine activity//protein binding//serine hydrolase activity//peptidase activity//receptor binding//catalytic activity//binding//endopeptidase activity//serine-type peptidase activity//hydrolase activity
Csa1G046130	F-box protein SKIP16-like; K06195 ApaG protein	http://www.genome.jp/dbget-bin/www_bget?csv:101223853	--	--	--	--	GO:0003674//GO:0030246//GO:0005515//GO:0005488	molecular_function//carbohydrate binding//protein binding//binding
Csa1G046170	anthranilate phosphoribosyltransferase, chloroplastic-like; K00766 anthranilate phosphoribosyltransferase [EC:2.4.2.18]	http://www.genome.jp/dbget-bin/www_bget?csv:101204330	GO:0051704//GO:0008150//GO:0008152//GO:0009405	multi-organism process//biological_process//metabolic process//pathogenesis	--	--	GO:0003674//GO:0005198//GO:0003824//GO:0016757//GO:0016740	molecular_function//structural molecule activity//catalytic activity//transferase activity, transferring glycosyl groups//transferase activity
Csa1G046260	uncharacterized LOC101205708	http://www.genome.jp/dbget-bin/www_bget?csv:101205708	--	--	--	--	--	--
Csa1G046880	--	--	--	--	--	--	--	--
Csa1G049460	BTB/POZ and TAZ domain-containing protein 1-like	http://www.genome.jp/dbget-bin/www_bget?csv:101226895	GO:0080090//GO:0016070//GO:0044260//GO:0044249//GO:0008152//GO:0006807//GO:0044238//GO:0090304//GO:0046483//GO:0019438//GO:0010467//GO:0019222//GO:0010468//GO:0032774//GO:0019219//GO:0010556//GO:0031326//GO:0060255//GO:0051252//GO:0006725//GO:2001141//GO:0008150//GO:0018130//GO:0006139//GO:0006355//GO:0034645//GO:0043170//GO:0044271//GO:0050794//GO:0051171//GO:0071704//GO:0044237//GO:0006351//GO:…	regulation of primary metabolic process//RNA metabolic process//cellular macromolecule metabolic process//cellular biosynthetic process//metabolic process//nitrogen compound metabolic process//primary metabolic process//nucleic acid metabolic process//heterocycle metabolic process//aromatic compound biosynthetic process//gene expression//regulation of metabolic process//regulation of gene express…	GO:0043227//GO:0043226//GO:0043229//GO:0043231//GO:0044464//GO:0005575//GO:0005622//GO:0044424//GO:0005623//GO:0005634	membrane-bounded organelle//organelle//intracellular organelle//intracellular membrane-bounded organelle//cell part//cellular_component//intracellular//intracellular part//cell//nucleus	GO:0016410//GO:0008080//GO:0000989//GO:0016740//GO:0000988//GO:0003712//GO:0004402//GO:0046872//GO:0043167//GO:0005488//GO:0043169//GO:0003824//GO:0016407//GO:0008270//GO:0003674//GO:0016746//GO:0046914//GO:0005515//GO:0016747	N-acyltransferase activity//N-acetyltransferase activity//transcription factor binding transcription factor activity//transferase activity//protein binding transcription factor activity//transcription cofactor activity//histone acetyltransferase activity//metal ion binding//ion binding//binding//cation binding//catalytic activity//acetyltransferase activity//zinc ion binding//molecular_function//…
Csa1G050110	uncharacterized LOC101230057	http://www.genome.jp/dbget-bin/www_bget?csv:101230057	--	--	--	--	--	--
Csa1G050220	vinorine synthase-like	http://www.genome.jp/dbget-bin/www_bget?csv:101203956	--	--	--	--	GO:0003824//GO:0016740//GO:0016747//GO:0016746//GO:0003674	catalytic activity//transferase activity//transferase activity, transferring acyl groups other than amino-acyl groups//transferase activity, transferring acyl groups//molecular_function
Csa1G050280	4-coumarate--CoA ligase-like 9-like	http://www.genome.jp/dbget-bin/www_bget?csv:101211791	GO:0008150//GO:0008152	biological_process//metabolic process	--	--	GO:0043167//GO:0005488//GO:0043169//GO:0003824//GO:0046872//GO:0046914//GO:0008270//GO:0003674	ion binding//binding//cation binding//catalytic activity//metal ion binding//transition metal ion binding//zinc ion binding//molecular_function
Csa1G050300	4-coumarate--CoA ligase-like 9-like	http://www.genome.jp/dbget-bin/www_bget?csv:101211791	GO:0008152//GO:0008150	metabolic process//biological_process	--	--	GO:0003674//GO:0003824	molecular_function//catalytic activity
Csa1G050370	probable inactive leucine-rich repeat receptor-like protein kinase At3g03770-like	http://www.genome.jp/dbget-bin/www_bget?csv:101215008	GO:0050789//GO:0044267//GO:0044237//GO:0006351//GO:0071704//GO:0051171//GO:0050794//GO:0043170//GO:0034645//GO:0044271//GO:0006355//GO:0016310//GO:0019538//GO:0034654//GO:2000112//GO:0009889//GO:0034641//GO:0009987//GO:0031323//GO:0009058//GO:0065007//GO:0009059//GO:0006793//GO:0008152//GO:0006468//GO:0006796//GO:0016070//GO:0044260//GO:0044249//GO:0080090//GO:0006366//GO:0008150//GO:2001141//GO:…	regulation of biological process//cellular protein metabolic process//cellular metabolic process//transcription, DNA-dependent//organic substance metabolic process//regulation of nitrogen compound metabolic process//regulation of cellular process//macromolecule metabolic process//cellular macromolecule biosynthetic process//cellular nitrogen compound biosynthetic process//regulation of transcript…	GO:0005622//GO:0044446//GO:0016592//GO:0005575//GO:0044422//GO:0005634//GO:0005623//GO:0044451//GO:0044424//GO:0031974//GO:0044428//GO:0044464//GO:0005654//GO:0070013//GO:0032991//GO:0043234//GO:0043229//GO:0031981//GO:0043231//GO:0043233//GO:0043227//GO:0043226	intracellular//intracellular organelle part//mediator complex//cellular_component//organelle part//nucleus//cell//nucleoplasm part//intracellular part//membrane-enclosed lumen//nuclear part//cell part//nucleoplasm//intracellular organelle lumen//macromolecular complex//protein complex//intracellular organelle//nuclear lumen//intracellular membrane-bounded organelle//organelle lumen//membrane-boun…	GO:0032553//GO:0003674//GO:0032550//GO:0030554//GO:0001882//GO:0097159//GO:0000166//GO:0016301//GO:0017076//GO:0043168//GO:0005524//GO:0004672//GO:0032559//GO:0005515//GO:0016740//GO:0016772//GO:0032555//GO:0035639//GO:0000989//GO:0001104//GO:0003824//GO:0005488//GO:0001883//GO:0032549//GO:0043167//GO:0001076//GO:0000988//GO:0016773//GO:0003712	ribonucleotide binding//molecular_function//purine ribonucleoside binding//adenyl nucleotide binding//nucleoside binding//organic cyclic compound binding//nucleotide binding//kinase activity//purine nucleotide binding//anion binding//ATP binding//protein kinase activity//adenyl ribonucleotide binding//protein binding//transferase activity//transferase activity, transferring phosphorus-containing …
Csa1G050410	cycloeucalenol cycloisomerase-like; K08246 cycloeucalenol cycloisomerase [EC:5.5.1.9]	http://www.genome.jp/dbget-bin/www_bget?csv:101215719	GO:0032502//GO:0009847//GO:0008150	developmental process//spore germination//biological_process	GO:0031224//GO:0005575//GO:0044425//GO:0016021//GO:0016020	intrinsic to membrane//cellular_component//membrane part//integral to membrane//membrane	--	--
Csa1G051620	uncharacterized LOC101218262	http://www.genome.jp/dbget-bin/www_bget?csv:101218262	GO:0044260//GO:0016070//GO:0044249//GO:0080090//GO:0055114//GO:0008152//GO:0006810//GO:0051234//GO:0006812//GO:0019222//GO:0019438//GO:0046483//GO:0010467//GO:0006807//GO:0090304//GO:0044238//GO:2001141//GO:0008150//GO:0018130//GO:0006139//GO:0060255//GO:0051252//GO:0006725//GO:0051179//GO:0010556//GO:0031326//GO:0019219//GO:0010468//GO:0032774//GO:0050794//GO:0034645//GO:0043170//GO:0044271//GO:…	cellular macromolecule metabolic process//RNA metabolic process//cellular biosynthetic process//regulation of primary metabolic process//oxidation-reduction process//metabolic process//transport//establishment of localization//cation transport//regulation of metabolic process//aromatic compound biosynthetic process//heterocycle metabolic process//gene expression//nitrogen compound metabolic proce…	GO:0005783//GO:0043229//GO:0043231//GO:0005737//GO:0043226//GO:0043227//GO:0044464//GO:0044444//GO:0005575//GO:0005622//GO:0005623//GO:0044424	endoplasmic reticulum//intracellular organelle//intracellular membrane-bounded organelle//cytoplasm//organelle//membrane-bounded organelle//cell part//cytoplasmic part//cellular_component//intracellular//cell//intracellular part	GO:0016972//GO:0003676//GO:0003677//GO:0046872//GO:0016491//GO:0016670//GO:0003824//GO:0005488//GO:0043169//GO:0003700//GO:0043167//GO:0001071//GO:0003674//GO:0097159//GO:0016667	thiol oxidase activity//nucleic acid binding//DNA binding//metal ion binding//oxidoreductase activity//oxidoreductase activity, acting on a sulfur group of donors, oxygen as acceptor//catalytic activity//binding//cation binding//sequence-specific DNA binding transcription factor activity//ion binding//nucleic acid binding transcription factor activity//molecular_function//organic cyclic compound …
Csa1G051710	bidirectional sugar transporter SWEET12-like; K15382 solute carrier family 50 (sugar transporter)	http://www.genome.jp/dbget-bin/www_bget?csv:101212917	GO:0035821//GO:0019048//GO:0044003//GO:0051704//GO:0044403//GO:0065007//GO:0019087//GO:0009987//GO:0065008//GO:0016032//GO:0044419//GO:0051817//GO:0008150//GO:0051701	modification of morphology or physiology of other organism//virus-host interaction//modification by symbiont of host morphology or physiology//multi-organism process//symbiosis, encompassing mutualism through parasitism//biological regulation//transformation of host cell by virus//cellular process//regulation of biological quality//viral reproduction//interspecies interaction between organisms//m…	GO:0031224//GO:0005575//GO:0044425//GO:0016021//GO:0016020	intrinsic to membrane//cellular_component//membrane part//integral to membrane//membrane	--	--
Csa1G051870	LRR receptor-like serine/threonine-protein kinase FLS2-like	http://www.genome.jp/dbget-bin/www_bget?csv:101218312	--	--	--	--	GO:0005488//GO:0005515//GO:0003674	binding//protein binding//molecular_function
Csa1G056940	putative UDP-glucose flavonoid 3-O-glucosyltransferase 3-like	http://www.genome.jp/dbget-bin/www_bget?csv:101216616	GO:0006629//GO:0009987//GO:0005975//GO:0044237//GO:0071704//GO:0044255//GO:0044238//GO:0030259//GO:0008150//GO:0008152//GO:0055114//GO:0070085//GO:0030258	lipid metabolic process//cellular process//carbohydrate metabolic process//cellular metabolic process//organic substance metabolic process//cellular lipid metabolic process//primary metabolic process//lipid glycosylation//biological_process//metabolic process//oxidation-reduction process//glycosylation//lipid modification	GO:0005575//GO:0019028//GO:0019012//GO:0044423	cellular_component//viral capsid//virion//virion part	GO:0016706//GO:0030246//GO:0008168//GO:0051213//GO:0003674//GO:0016758//GO:0016705//GO:0016491//GO:0003824//GO:0016741//GO:0005488//GO:0016740//GO:0016757	oxidoreductase activity, acting on paired donors, with incorporation or reduction of molecular oxygen, 2-oxoglutarate as one donor, and incorporation of one atom each of oxygen into both donors//carbohydrate binding//methyltransferase activity//dioxygenase activity//molecular_function//transferase activity, transferring hexosyl groups//oxidoreductase activity, acting on paired donors, with incorp…
Csa1G056970	allantoate deiminase, chloroplastic-like; K02083 allantoate deiminase [EC:3.5.3.9]	http://www.genome.jp/dbget-bin/www_bget?csv:101218185	GO:0019538//GO:0006508//GO:0071704//GO:0043170//GO:0008150//GO:0044238//GO:0008152	protein metabolic process//proteolysis//organic substance metabolic process//macromolecule metabolic process//biological_process//primary metabolic process//metabolic process	--	--	GO:0003674//GO:0003824//GO:0016787//GO:0008233	molecular_function//catalytic activity//hydrolase activity//peptidase activity
Csa1G062380	5'-adenylylsulfate reductase 1, chloroplastic-like; K05907 adenylyl-sulfate reductase (glutathione) [EC:1.8.4.9]	http://www.genome.jp/dbget-bin/www_bget?csv:101211864	GO:0009165//GO:0046129//GO:0044249//GO:0044281//GO:0015992//GO:0065008//GO:0009145//GO:0042278//GO:0006796//GO:0006812//GO:0009152//GO:0009199//GO:0006818//GO:0055114//GO:0006810//GO:0009142//GO:0006793//GO:0008152//GO:0015672//GO:0051234//GO:0072521//GO:0046483//GO:0019438//GO:0009119//GO:0006807//GO:0009141//GO:0044238//GO:0019637//GO:0051179//GO:0006163//GO:0009163//GO:0009201//GO:0046128//GO:…	nucleotide biosynthetic process//purine ribonucleoside biosynthetic process//cellular biosynthetic process//small molecule metabolic process//proton transport//regulation of biological quality//purine nucleoside triphosphate biosynthetic process//purine nucleoside metabolic process//phosphate-containing compound metabolic process//cation transport//purine ribonucleotide biosynthetic process//ribo…	GO:0031967//GO:0045259//GO:0044429//GO:0005739//GO:0005737//GO:0043227//GO:0043226//GO:0043229//GO:0031966//GO:0043231//GO:0000276//GO:0043234//GO:0044444//GO:0044464//GO:0005753//GO:0016020//GO:0032991//GO:0044422//GO:0016469//GO:0005575//GO:0044446//GO:0044425//GO:0005622//GO:0033177//GO:0045263//GO:0044455//GO:0031090//GO:0005743//GO:0031975//GO:0005740//GO:0019866//GO:0044424//GO:0005623	organelle envelope//proton-transporting ATP synthase complex//mitochondrial part//mitochondrion//cytoplasm//membrane-bounded organelle//organelle//intracellular organelle//mitochondrial membrane//intracellular membrane-bounded organelle//mitochondrial proton-transporting ATP synthase complex, coupling factor F(o)//protein complex//cytoplasmic part//cell part//mitochondrial proton-transporting ATP…	GO:0008324//GO:0022857//GO:0016491//GO:0015075//GO:0022891//GO:0003824//GO:0005215//GO:0015077//GO:0022890//GO:0003674//GO:0016209//GO:0022892//GO:0015078	cation transmembrane transporter activity//transmembrane transporter activity//oxidoreductase activity//ion transmembrane transporter activity//substrate-specific transmembrane transporter activity//catalytic activity//transporter activity//monovalent inorganic cation transmembrane transporter activity//inorganic cation transmembrane transporter activity//molecular_function//antioxidant activity/…
Csa1G063520	UPF0051 protein ABCI8, chloroplastic-like	http://www.genome.jp/dbget-bin/www_bget?csv:101226285	GO:0009058//GO:0009987//GO:0019538//GO:0071840//GO:0071704//GO:0044085//GO:0044237//GO:0045116//GO:0044267//GO:0043170//GO:0031163//GO:0016043//GO:0070647//GO:0006464//GO:0008150//GO:0044238//GO:0043412//GO:0016226//GO:0008152//GO:0032446//GO:0022607//GO:0044260	biosynthetic process//cellular process//protein metabolic process//cellular component organization or biogenesis//organic substance metabolic process//cellular component biogenesis//cellular metabolic process//protein neddylation//cellular protein metabolic process//macromolecule metabolic process//metallo-sulfur cluster assembly//cellular component organization//protein modification by small pro…	--	--	GO:0005524//GO:0016881//GO:0032559//GO:0000166//GO:0097159//GO:0001882//GO:0032550//GO:0030554//GO:0003674//GO:0032553//GO:0043168//GO:0017076//GO:0043167//GO:0005488//GO:0032549//GO:0001883//GO:0003824//GO:0016874//GO:0016879//GO:0032555//GO:0035639	ATP binding//acid-amino acid ligase activity//adenyl ribonucleotide binding//nucleotide binding//organic cyclic compound binding//nucleoside binding//purine ribonucleoside binding//adenyl nucleotide binding//molecular_function//ribonucleotide binding//anion binding//purine nucleotide binding//ion binding//binding//ribonucleoside binding//purine nucleoside binding//catalytic activity//ligase activ…
Csa1G064740	probable pyruvate, phosphate dikinase regulatory protein, chloroplastic-like; K09773 hypothetical protein	http://www.genome.jp/dbget-bin/www_bget?csv:101220007	--	--	--	--	GO:0043167//GO:0005488//GO:0032549//GO:0001883//GO:0003824//GO:0016740//GO:0016772//GO:0032555//GO:0035639//GO:0005524//GO:0032559//GO:0000166//GO:0097159//GO:0001882//GO:0032550//GO:0030554//GO:0003674//GO:0032553//GO:0043168//GO:0017076	ion binding//binding//ribonucleoside binding//purine nucleoside binding//catalytic activity//transferase activity//transferase activity, transferring phosphorus-containing groups//purine ribonucleotide binding//purine ribonucleoside triphosphate binding//ATP binding//adenyl ribonucleotide binding//nucleotide binding//organic cyclic compound binding//nucleoside binding//purine ribonucleoside bindi…
Csa1G064870	cysteine-rich receptor-like protein kinase 29-like	http://www.genome.jp/dbget-bin/www_bget?csv:101207184	GO:0043170//GO:0044267//GO:0044237//GO:0071704//GO:0019538//GO:0016310//GO:0009987//GO:0044260//GO:0008152//GO:0006793//GO:0006468//GO:0006796//GO:0043412//GO:0044238//GO:0008150//GO:0006464	macromolecule metabolic process//cellular protein metabolic process//cellular metabolic process//organic substance metabolic process//protein metabolic process//phosphorylation//cellular process//cellular macromolecule metabolic process//metabolic process//phosphorus metabolic process//protein phosphorylation//phosphate-containing compound metabolic process//macromolecule modification//primary me…	GO:0005575//GO:0016020	cellular_component//membrane	GO:0016301//GO:0017076//GO:0043168//GO:0003674//GO:0032550//GO:0030554//GO:0032553//GO:0001882//GO:0097159//GO:0000166//GO:0032559//GO:0004672//GO:0005524//GO:0035639//GO:0016772//GO:0032555//GO:0016740//GO:0016773//GO:0003824//GO:0032549//GO:0001883//GO:0005488//GO:0043167	kinase activity//purine nucleotide binding//anion binding//molecular_function//purine ribonucleoside binding//adenyl nucleotide binding//ribonucleotide binding//nucleoside binding//organic cyclic compound binding//nucleotide binding//adenyl ribonucleotide binding//protein kinase activity//ATP binding//purine ribonucleoside triphosphate binding//transferase activity, transferring phosphorus-contai…
Csa1G065410	uncharacterized LOC101220005	http://www.genome.jp/dbget-bin/www_bget?csv:101220005	--	--	GO:0016020//GO:0044425//GO:0031224//GO:0005575//GO:0016021	membrane//membrane part//intrinsic to membrane//cellular_component//integral to membrane	--	--
Csa1G065420	cysteine-rich receptor-like protein kinase 29-like	http://www.genome.jp/dbget-bin/www_bget?csv:101232153	GO:0071840//GO:0019538//GO:0016310//GO:0009987//GO:0016043//GO:0043170//GO:0044267//GO:0044237//GO:0071704//GO:0043412//GO:0044238//GO:0008150//GO:0016050//GO:0006464//GO:0044260//GO:0031412//GO:0008152//GO:0006793//GO:0006996//GO:0006468//GO:0006796	cellular component organization or biogenesis//protein metabolic process//phosphorylation//cellular process//cellular component organization//macromolecule metabolic process//cellular protein metabolic process//cellular metabolic process//organic substance metabolic process//macromolecule modification//primary metabolic process//biological_process//vesicle organization//protein modification proce…	--	--	GO:0032559//GO:0004672//GO:0005524//GO:0016301//GO:0017076//GO:0043168//GO:0032550//GO:0003674//GO:0030554//GO:0032553//GO:0097159//GO:0001882//GO:0000166//GO:0016773//GO:0003824//GO:0032549//GO:0001883//GO:0005488//GO:0043167//GO:0035639//GO:0016772//GO:0032555//GO:0016740	adenyl ribonucleotide binding//protein kinase activity//ATP binding//kinase activity//purine nucleotide binding//anion binding//purine ribonucleoside binding//molecular_function//adenyl nucleotide binding//ribonucleotide binding//organic cyclic compound binding//nucleoside binding//nucleotide binding//phosphotransferase activity, alcohol group as acceptor//catalytic activity//ribonucleoside bindi…
Csa1G066520	BTB/POZ domain-containing protein At3g22104-like	http://www.genome.jp/dbget-bin/www_bget?csv:101221664	GO:0009416//GO:0050896//GO:0008150//GO:0009628//GO:0009314	response to light stimulus//response to stimulus//biological_process//response to abiotic stimulus//response to radiation	--	--	GO:0005488//GO:0060089//GO:0005515//GO:0003674//GO:0004871	binding//molecular transducer activity//protein binding//molecular_function//signal transducer activity
Csa1G066560	(3S,6E)-nerolidol synthase 1-like; K15086 (3S)-linalool synthase [EC:4.2.3.25]	http://www.genome.jp/dbget-bin/www_bget?csv:101221188	GO:0046483//GO:0019438//GO:0010467//GO:0006807//GO:0044238//GO:0090304//GO:0019222//GO:0031326//GO:0010556//GO:0010468//GO:0032774//GO:0019219//GO:0008150//GO:2001141//GO:0006139//GO:0018130//GO:0060255//GO:0006725//GO:0051252//GO:0080090//GO:0016070//GO:0044260//GO:0044249//GO:0008152//GO:0009059//GO:0065007//GO:0034641//GO:0009987//GO:0031323//GO:0009058//GO:0034654//GO:2000112//GO:0009889//GO:…	heterocycle metabolic process//aromatic compound biosynthetic process//gene expression//nitrogen compound metabolic process//primary metabolic process//nucleic acid metabolic process//regulation of metabolic process//regulation of cellular biosynthetic process//regulation of macromolecule biosynthetic process//regulation of gene expression//RNA biosynthetic process//regulation of nucleobase-conta…	--	--	GO:0010333//GO:0046872//GO:0000287//GO:0005488//GO:0043169//GO:0043167//GO:0003824//GO:0003676//GO:0016838//GO:0003677//GO:0016835//GO:0016829//GO:0003674//GO:0097159	terpene synthase activity//metal ion binding//magnesium ion binding//binding//cation binding//ion binding//catalytic activity//nucleic acid binding//carbon-oxygen lyase activity, acting on phosphates//DNA binding//carbon-oxygen lyase activity//lyase activity//molecular_function//organic cyclic compound binding
Csa1G066570	(3S,6E)-nerolidol synthase 1-like; K15086 (3S)-linalool synthase [EC:4.2.3.25]	http://www.genome.jp/dbget-bin/www_bget?csv:101221188	GO:0008150//GO:0008152	biological_process//metabolic process	--	--	GO:0016835//GO:0016829//GO:0003674//GO:0010333//GO:0003824//GO:0016838	carbon-oxygen lyase activity//lyase activity//molecular_function//terpene synthase activity//catalytic activity//carbon-oxygen lyase activity, acting on phosphates
Csa1G068570	(3S,6E)-nerolidol synthase 1-like; K15086 (3S)-linalool synthase [EC:4.2.3.25]	http://www.genome.jp/dbget-bin/www_bget?csv:101215070	GO:0008152//GO:0008150	metabolic process//biological_process	--	--	GO:0016838//GO:0000287//GO:0046872//GO:0010333//GO:0003824//GO:0005488//GO:0043169//GO:0043167//GO:0003674//GO:0016835//GO:0016829	carbon-oxygen lyase activity, acting on phosphates//magnesium ion binding//metal ion binding//terpene synthase activity//catalytic activity//binding//cation binding//ion binding//molecular_function//carbon-oxygen lyase activity//lyase activity
Csa1G070620	G-type lectin S-receptor-like serine/threonine-protein kinase RKS1-like	http://www.genome.jp/dbget-bin/www_bget?csv:101229040	GO:0009987//GO:0051704//GO:0009875//GO:0000003//GO:0009856//GO:0048610//GO:0008150//GO:0007154//GO:0048544//GO:0022414//GO:0032501//GO:0008037	cellular process//multi-organism process//pollen-pistil interaction//reproduction//pollination//cellular process involved in reproduction//biological_process//cell communication//recognition of pollen//reproductive process//multicellular organismal process//cell recognition	--	--	GO:0004672//GO:0003674//GO:0016301//GO:0003824//GO:0004674//GO:0016773//GO:0016740//GO:0016772	protein kinase activity//molecular_function//kinase activity//catalytic activity//protein serine/threonine kinase activity//phosphotransferase activity, alcohol group as acceptor//transferase activity//transferase activity, transferring phosphorus-containing groups
Csa1G071260	uncharacterized LOC101215697	http://www.genome.jp/dbget-bin/www_bget?csv:101215697	GO:0048544//GO:0008150//GO:0048610//GO:0007154//GO:0022414//GO:0008037//GO:0032501//GO:0051704//GO:0009987//GO:0009856//GO:0009875//GO:0000003	recognition of pollen//biological_process//cellular process involved in reproduction//cell communication//reproductive process//cell recognition//multicellular organismal process//multi-organism process//cellular process//pollination//pollen-pistil interaction//reproduction	--	--	--	--
Csa1G071280	uncharacterized LOC101215940	http://www.genome.jp/dbget-bin/www_bget?csv:101215940	GO:0009987//GO:0016310//GO:0019538//GO:0051704//GO:0044237//GO:0071704//GO:0000003//GO:0009875//GO:0044267//GO:0009856//GO:0043170//GO:0006464//GO:0007154//GO:0008150//GO:0048610//GO:0043412//GO:0048544//GO:0044238//GO:0006796//GO:0032501//GO:0008037//GO:0008152//GO:0006793//GO:0006468//GO:0022414//GO:0044260	cellular process//phosphorylation//protein metabolic process//multi-organism process//cellular metabolic process//organic substance metabolic process//reproduction//pollen-pistil interaction//cellular protein metabolic process//pollination//macromolecule metabolic process//protein modification process//cell communication//biological_process//cellular process involved in reproduction//macromolecul…	--	--	GO:0005524//GO:0004672//GO:0046914//GO:0032559//GO:0008270//GO:0000166//GO:0032550//GO:0003674//GO:0030554//GO:0032553//GO:0001882//GO:0097159//GO:0043168//GO:0016301//GO:0017076//GO:0005488//GO:0032549//GO:0001883//GO:0043169//GO:0043167//GO:0003824//GO:0016773//GO:0046872//GO:0016740//GO:0032555//GO:0016772//GO:0035639	ATP binding//protein kinase activity//transition metal ion binding//adenyl ribonucleotide binding//zinc ion binding//nucleotide binding//purine ribonucleoside binding//molecular_function//adenyl nucleotide binding//ribonucleotide binding//nucleoside binding//organic cyclic compound binding//anion binding//kinase activity//purine nucleotide binding//binding//ribonucleoside binding//purine nucleosi…
Csa1G071830	protein MOTHER of FT and TF 1-like	http://www.genome.jp/dbget-bin/www_bget?csv:101228550	--	--	--	--	--	--
Csa1G071840	uncharacterized LOC101216901; K09422 myb proto-oncogene protein, plant	http://www.genome.jp/dbget-bin/www_bget?csv:101216901	--	--	--	--	GO:0003674//GO:0097159//GO:0005488//GO:0003676//GO:0003677	molecular_function//organic cyclic compound binding//binding//nucleic acid binding//DNA binding
Csa1G071890	NAD(P)H dehydrogenase B3, mitochondrial-like; K17871 NADH:ubiquinone reductase (non-electrogenic) [EC:1.6.5.9]	http://www.genome.jp/dbget-bin/www_bget?csv:101228770	GO:0071704//GO:0044237//GO:0034645//GO:0043170//GO:0009058//GO:0009987//GO:0034641//GO:0009059//GO:0051234//GO:0008152//GO:0006810//GO:0055114//GO:0044249//GO:0006259//GO:0044260//GO:0006725//GO:0006139//GO:0008150//GO:0051179//GO:0006260//GO:0090304//GO:0044238//GO:0006807//GO:0046483	organic substance metabolic process//cellular metabolic process//cellular macromolecule biosynthetic process//macromolecule metabolic process//biosynthetic process//cellular process//cellular nitrogen compound metabolic process//macromolecule biosynthetic process//establishment of localization//metabolic process//transport//oxidation-reduction process//cellular biosynthetic process//DNA metabolic…	GO:0005622//GO:0005575//GO:0005623//GO:0044424//GO:0042575//GO:0009360//GO:0032991//GO:0016020//GO:0044464//GO:0043234	intracellular//cellular_component//cell//intracellular part//DNA polymerase complex//DNA polymerase III complex//macromolecular complex//membrane//cell part//protein complex	GO:0048037//GO:0097159//GO:0003674//GO:0000166//GO:0004518//GO:0008408//GO:0050660//GO:0043168//GO:0003887//GO:0016779//GO:0050662//GO:0003677//GO:0016740//GO:0003676//GO:0034061//GO:0016772//GO:0004527//GO:0005215//GO:0003824//GO:0043167//GO:0016788//GO:0005488//GO:0016787//GO:0016491	cofactor binding//organic cyclic compound binding//molecular_function//nucleotide binding//nuclease activity//3'-5' exonuclease activity//flavin adenine dinucleotide binding//anion binding//DNA-directed DNA polymerase activity//nucleotidyltransferase activity//coenzyme binding//DNA binding//transferase activity//nucleic acid binding//DNA polymerase activity//transferase activity, transferring pho…
Csa1G071940	uncharacterized LOC101205116	http://www.genome.jp/dbget-bin/www_bget?csv:101205116	--	--	--	--	--	--
Csa1G072440	transmembrane protein 184C-like	http://www.genome.jp/dbget-bin/www_bget?csv:101230119	GO:0005975//GO:0071704//GO:0008152//GO:0044238//GO:0008150	carbohydrate metabolic process//organic substance metabolic process//metabolic process//primary metabolic process//biological_process	--	--	GO:0003674//GO:0016798//GO:0008810//GO:0004553//GO:0016787//GO:0003824	molecular_function//hydrolase activity, acting on glycosyl bonds//cellulase activity//hydrolase activity, hydrolyzing O-glycosyl compounds//hydrolase activity//catalytic activity
Csa1G072450	endonuclease 1-like	http://www.genome.jp/dbget-bin/www_bget?csv:101217378	GO:0034641//GO:0009987//GO:0046700//GO:0019439//GO:0043170//GO:0044237//GO:0044248//GO:0034655//GO:0071704//GO:0046483//GO:0044238//GO:0090304//GO:0006807//GO:0006308//GO:0006139//GO:0008150//GO:0006725//GO:0009057//GO:0044265//GO:0006259//GO:0044260//GO:0009056//GO:0044270//GO:0008152	cellular nitrogen compound metabolic process//cellular process//heterocycle catabolic process//aromatic compound catabolic process//macromolecule metabolic process//cellular metabolic process//cellular catabolic process//nucleobase-containing compound catabolic process//organic substance metabolic process//heterocycle metabolic process//primary metabolic process//nucleic acid metabolic process//n…	--	--	GO:0046914//GO:0004518//GO:0008270//GO:0003674//GO:0097159//GO:0016787//GO:0046872//GO:0043169//GO:0005488//GO:0016788//GO:0004519//GO:0043167//GO:0003824//GO:0003676	transition metal ion binding//nuclease activity//zinc ion binding//molecular_function//organic cyclic compound binding//hydrolase activity//metal ion binding//cation binding//binding//hydrolase activity, acting on ester bonds//endonuclease activity//ion binding//catalytic activity//nucleic acid binding
Csa1G072490	katanin p80 WD40 repeat-containing subunit B1 homolog; K18643 katanin p80 WD40 repeat-containing subunit B1	http://www.genome.jp/dbget-bin/www_bget?csv:101218078	GO:0009059//GO:0015031//GO:0034613//GO:0065007//GO:0051641//GO:0043043//GO:0006790//GO:0031323//GO:0009058//GO:0009306//GO:0006760//GO:0046394//GO:0009987//GO:0006508//GO:0034641//GO:0009889//GO:0051604//GO:0019184//GO:0006888//GO:0044283//GO:0006082//GO:0019538//GO:2000112//GO:0044272//GO:0034654//GO:0006749//GO:0006355//GO:0034645//GO:0043170//GO:0044271//GO:0050794//GO:0051649//GO:0046907//GO:…	macromolecule biosynthetic process//protein transport//cellular protein localization//biological regulation//cellular localization//peptide biosynthetic process//sulfur compound metabolic process//regulation of cellular metabolic process//biosynthetic process//protein secretion//folic acid-containing compound metabolic process//carboxylic acid biosynthetic process//cellular process//proteolysis//…	GO:0031090//GO:0031974//GO:0016023//GO:0030659//GO:0044424//GO:0031410//GO:0005623//GO:0044451//GO:0030117//GO:0030133//GO:0012506//GO:0005634//GO:0044422//GO:0005575//GO:0030120//GO:0016592//GO:0044446//GO:0005622//GO:0012507//GO:0030127//GO:0044425//GO:0044433//GO:0043227//GO:0043226//GO:0030658//GO:0005737//GO:0043233//GO:0043229//GO:0031981//GO:0043231//GO:0030134//GO:0031982//GO:0044444//GO:…	organelle membrane//membrane-enclosed lumen//cytoplasmic membrane-bounded vesicle//cytoplasmic vesicle membrane//intracellular part//cytoplasmic vesicle//cell//nucleoplasm part//membrane coat//transport vesicle//vesicle membrane//nucleus//organelle part//cellular_component//vesicle coat//mediator complex//intracellular organelle part//intracellular//ER to Golgi transport vesicle membrane//COPII v…	GO:0046914//GO:0017171//GO:0005515//GO:0032559//GO:0005524//GO:0016881//GO:0043168//GO:0016882//GO:0070011//GO:0004252//GO:0017076//GO:0030272//GO:0008270//GO:0000166//GO:0097159//GO:0001882//GO:0032553//GO:0003674//GO:0032550//GO:0030554//GO:0000988//GO:0003712//GO:0016787//GO:0001076//GO:0046872//GO:0008236//GO:0004175//GO:0043167//GO:0005488//GO:0043169//GO:0001883//GO:0032549//GO:0003824//GO:…	transition metal ion binding//serine hydrolase activity//protein binding//adenyl ribonucleotide binding//ATP binding//acid-amino acid ligase activity//anion binding//cyclo-ligase activity//peptidase activity, acting on L-amino acid peptides//serine-type endopeptidase activity//purine nucleotide binding//5-formyltetrahydrofolate cyclo-ligase activity//zinc ion binding//nucleotide binding//organic …
Csa1G073750	sphingolipid delta(4)-desaturase DES1-like; K04712 sphingolipid delta-4 desaturase [EC:1.14.-.-]	http://www.genome.jp/dbget-bin/www_bget?csv:101224821	GO:0006633//GO:0019752//GO:0043436//GO:0032787//GO:0016053//GO:0055114//GO:0008152//GO:0080090//GO:0016070//GO:0044260//GO:0044249//GO:0044281//GO:0010468//GO:0032774//GO:0019219//GO:0031326//GO:0010556//GO:0060255//GO:0006725//GO:0051252//GO:0008150//GO:2001141//GO:0006139//GO:0018130//GO:0006807//GO:0044238//GO:0090304//GO:0046483//GO:0019438//GO:0006631//GO:0010467//GO:0044255//GO:0019222//GO:…	fatty acid biosynthetic process//carboxylic acid metabolic process//oxoacid metabolic process//monocarboxylic acid metabolic process//organic acid biosynthetic process//oxidation-reduction process//metabolic process//regulation of primary metabolic process//RNA metabolic process//cellular macromolecule metabolic process//cellular biosynthetic process//small molecule metabolic process//regulation …	GO:0044464//GO:0016020//GO:0043227//GO:0043226//GO:0043229//GO:0043231//GO:0005622//GO:0044425//GO:0005575//GO:0031224//GO:0044424//GO:0005623//GO:0005634//GO:0016021	cell part//membrane//membrane-bounded organelle//organelle//intracellular organelle//intracellular membrane-bounded organelle//intracellular//membrane part//cellular_component//intrinsic to membrane//intracellular part//cell//nucleus//integral to membrane	GO:0003700//GO:0043167//GO:0005488//GO:0043169//GO:0003824//GO:0016491//GO:0016705//GO:0046872//GO:0008270//GO:0003674//GO:0001071//GO:0046914	sequence-specific DNA binding transcription factor activity//ion binding//binding//cation binding//catalytic activity//oxidoreductase activity//oxidoreductase activity, acting on paired donors, with incorporation or reduction of molecular oxygen//metal ion binding//zinc ion binding//molecular_function//nucleic acid binding transcription factor activity//transition metal ion binding
Csa1G073840	probable phosphoglycerate mutase GpmB-like; K15637 serine/threonine-protein phosphatase PGAM5 [EC:3.1.3.16]	http://www.genome.jp/dbget-bin/www_bget?csv:101209465	--	--	--	--	--	--
Csa1G073850	callose synthase 11-like; K11000 callose synthase [EC:2.4.1.-]	http://www.genome.jp/dbget-bin/www_bget?csv:101222337	GO:0001539//GO:0071840//GO:0006075//GO:0009059//GO:0006073//GO:0051273//GO:0006379//GO:0009058//GO:0016051//GO:0034641//GO:0009987//GO:0051274//GO:0043170//GO:0034645//GO:0006364//GO:0006074//GO:0005975//GO:0044262//GO:0005976//GO:0071704//GO:0044085//GO:0016072//GO:0044237//GO:0034637//GO:0006807//GO:0040011//GO:0022613//GO:0044238//GO:0090304//GO:0046483//GO:0010467//GO:0006725//GO:0008150//GO:…	ciliary or flagellar motility//cellular component organization or biogenesis//(1->3)-beta-D-glucan biosynthetic process//macromolecule biosynthetic process//cellular glucan metabolic process//beta-glucan metabolic process//mRNA cleavage//biosynthetic process//carbohydrate biosynthetic process//cellular nitrogen compound metabolic process//cellular process//beta-glucan biosynthetic process//macrom…	GO:0009426//GO:0005623//GO:0044424//GO:0005575//GO:0000148//GO:0044461//GO:0044422//GO:0009288//GO:0043232//GO:0005622//GO:0044425//GO:0043229//GO:0043226//GO:0044459//GO:0032991//GO:0071944//GO:0005886//GO:0030694//GO:0044464//GO:0009425//GO:0000172//GO:0009427//GO:0016020//GO:0043234//GO:0044463//GO:0042995//GO:0005732//GO:0030677//GO:0030529//GO:0043228	bacterial-type flagellum basal body, distal rod//cell//intracellular part//cellular_component//1,3-beta-D-glucan synthase complex//bacterial-type flagellum part//organelle part//bacterial-type flagellum//intracellular non-membrane-bounded organelle//intracellular//membrane part//intracellular organelle//organelle//plasma membrane part//macromolecular complex//cell periphery//plasma membrane//bact…	GO:0017111//GO:0004540//GO:0003774//GO:0008194//GO:0016462//GO:0097159//GO:0016758//GO:0003674//GO:0004518//GO:0016787//GO:0003824//GO:0016818//GO:0016788//GO:0005488//GO:0003843//GO:0046527//GO:0035251//GO:0016757//GO:0016817//GO:0003676//GO:0016740//GO:0003723	nucleoside-triphosphatase activity//ribonuclease activity//motor activity//UDP-glycosyltransferase activity//pyrophosphatase activity//organic cyclic compound binding//transferase activity, transferring hexosyl groups//molecular_function//nuclease activity//hydrolase activity//catalytic activity//hydrolase activity, acting on acid anhydrides, in phosphorus-containing anhydrides//hydrolase activit…
Csa1G073900	uncharacterized LOC101228307	http://www.genome.jp/dbget-bin/www_bget?csv:101228307	--	--	--	--	GO:0005509//GO:0005488//GO:0043169//GO:0043167//GO:0046872//GO:0003674	calcium ion binding//binding//cation binding//ion binding//metal ion binding//molecular_function
Csa1G074920	uncharacterized LOC101226163	http://www.genome.jp/dbget-bin/www_bget?csv:101226163	--	--	--	--	--	--
Csa1G075030	ethylene-responsive transcription factor 12-like	http://www.genome.jp/dbget-bin/www_bget?csv:101212815	GO:0006355//GO:0034645//GO:0043170//GO:0044271//GO:0050794//GO:0051171//GO:0071704//GO:0006351//GO:0044237//GO:0050789//GO:0009059//GO:0065007//GO:0031323//GO:0009058//GO:0009987//GO:0034641//GO:0009889//GO:2000112//GO:0034654//GO:0080090//GO:0044260//GO:0016070//GO:0044249//GO:0008152//GO:0006807//GO:0090304//GO:0044238//GO:0019438//GO:0046483//GO:0010467//GO:0019222//GO:0019219//GO:0010468//GO:…	regulation of transcription, DNA-dependent//cellular macromolecule biosynthetic process//macromolecule metabolic process//cellular nitrogen compound biosynthetic process//regulation of cellular process//regulation of nitrogen compound metabolic process//organic substance metabolic process//transcription, DNA-dependent//cellular metabolic process//regulation of biological process//macromolecule bi…	--	--	GO:0001071//GO:0003674//GO:0003700	nucleic acid binding transcription factor activity//molecular_function//sequence-specific DNA binding transcription factor activity
Csa1G075060	ethylene-responsive transcription factor 9-like	http://www.genome.jp/dbget-bin/www_bget?csv:101203021	GO:0009059//GO:0065007//GO:0009987//GO:0034641//GO:0009058//GO:0031323//GO:2000112//GO:0034654//GO:0009889//GO:0006355//GO:0050794//GO:0044271//GO:0034645//GO:0043170//GO:0006351//GO:0044237//GO:0051171//GO:0071704//GO:0050789//GO:0010467//GO:0019438//GO:0046483//GO:0044238//GO:0090304//GO:0006807//GO:0019222//GO:0010556//GO:0031326//GO:0019219//GO:0032774//GO:0010468//GO:0018130//GO:0006139//GO:…	macromolecule biosynthetic process//biological regulation//cellular process//cellular nitrogen compound metabolic process//biosynthetic process//regulation of cellular metabolic process//regulation of cellular macromolecule biosynthetic process//nucleobase-containing compound biosynthetic process//regulation of biosynthetic process//regulation of transcription, DNA-dependent//regulation of cellul…	--	--	GO:0001071//GO:0003674//GO:0003700	nucleic acid binding transcription factor activity//molecular_function//sequence-specific DNA binding transcription factor activity
Csa1G075570	uncharacterized LOC101213056	http://www.genome.jp/dbget-bin/www_bget?csv:101213056	GO:0031323//GO:0009987//GO:0009893//GO:0010506//GO:0002376//GO:0031325//GO:0065007//GO:0031329//GO:0001539//GO:0010508//GO:0044248//GO:0071704//GO:0044237//GO:0009896//GO:0050789//GO:0005975//GO:0050794//GO:0050896//GO:0051179//GO:0009894//GO:0048522//GO:0048518//GO:0008150//GO:0044238//GO:0007155//GO:0040011//GO:0006914//GO:0031331//GO:0006955//GO:0019222//GO:0048870//GO:0008152//GO:0022610//GO:…	regulation of cellular metabolic process//cellular process//positive regulation of metabolic process//regulation of autophagy//immune system process//positive regulation of cellular metabolic process//biological regulation//regulation of cellular catabolic process//ciliary or flagellar motility//positive regulation of autophagy//cellular catabolic process//organic substance metabolic process//cel…	GO:0044424//GO:0005623//GO:0005576//GO:0019012//GO:0009288//GO:0005622//GO:0043232//GO:0019028//GO:0044420//GO:0005575//GO:0031012//GO:0005604//GO:0044464//GO:0043226//GO:0044423//GO:0043229//GO:0043228//GO:0044421//GO:0005578//GO:0019031	intracellular part//cell//extracellular region//virion//bacterial-type flagellum//intracellular//intracellular non-membrane-bounded organelle//viral capsid//extracellular matrix part//cellular_component//extracellular matrix//basement membrane//cell part//organelle//virion part//intracellular organelle//non-membrane-bounded organelle//extracellular region part//proteinaceous extracellular matrix/…	GO:0005524//GO:0005126//GO:0005515//GO:0032559//GO:0000166//GO:0001882//GO:0097159//GO:0030554//GO:0032550//GO:0003674//GO:0032553//GO:0043168//GO:0017076//GO:0005198//GO:0043167//GO:0032549//GO:0001883//GO:0005488//GO:0008083//GO:0005102//GO:0035639//GO:0032555	ATP binding//cytokine receptor binding//protein binding//adenyl ribonucleotide binding//nucleotide binding//nucleoside binding//organic cyclic compound binding//adenyl nucleotide binding//purine ribonucleoside binding//molecular_function//ribonucleotide binding//anion binding//purine nucleotide binding//structural molecule activity//ion binding//ribonucleoside binding//purine nucleoside binding//…
Csa1G077220	mitogen-activated protein kinase homolog NTF6-like; K04371 mitogen-activated protein kinase 1/3 [EC:2.7.11.24]	http://www.genome.jp/dbget-bin/www_bget?csv:101229716	GO:0044264//GO:0000271//GO:0006796//GO:0006468//GO:0008152//GO:0006793//GO:0033692//GO:0009103//GO:0046112//GO:0072527//GO:0044260//GO:0044281//GO:0044249//GO:0006464//GO:0006725//GO:0008150//GO:0006139//GO:0018130//GO:0034637//GO:0006807//GO:0044238//GO:0043412//GO:0046483//GO:0008653//GO:0044255//GO:0071704//GO:0044237//GO:0006206//GO:0044262//GO:0044267//GO:0005976//GO:0005975//GO:0043170//GO:…	cellular polysaccharide metabolic process//polysaccharide biosynthetic process//phosphate-containing compound metabolic process//protein phosphorylation//metabolic process//phosphorus metabolic process//cellular polysaccharide biosynthetic process//lipopolysaccharide biosynthetic process//nucleobase biosynthetic process//pyrimidine-containing compound metabolic process//cellular macromolecule met…	GO:0016020//GO:0044425//GO:0005575//GO:0031224//GO:0016021	membrane//membrane part//cellular_component//intrinsic to membrane//integral to membrane	GO:0016740//GO:0032555//GO:0016772//GO:0035639//GO:0043167//GO:0005488//GO:0032549//GO:0001883//GO:0003824//GO:0016773//GO:0000166//GO:0001882//GO:0097159//GO:0032550//GO:0003674//GO:0030554//GO:0032553//GO:0043168//GO:0005198//GO:0017076//GO:0016301//GO:0005524//GO:0004672//GO:0032559	transferase activity//purine ribonucleotide binding//transferase activity, transferring phosphorus-containing groups//purine ribonucleoside triphosphate binding//ion binding//binding//ribonucleoside binding//purine nucleoside binding//catalytic activity//phosphotransferase activity, alcohol group as acceptor//nucleotide binding//nucleoside binding//organic cyclic compound binding//purine ribonucl…
Csa1G077740	probable serine/threonine-protein kinase RLCKVII-like; K04733 interleukin-1 receptor-associated kinase 4 [EC:2.7.11.1]	http://www.genome.jp/dbget-bin/www_bget?csv:101229566	GO:0044260//GO:0008152//GO:0006793//GO:0006468//GO:0006796//GO:0043412//GO:0044238//GO:0008150//GO:0006464//GO:0043170//GO:0044267//GO:0044237//GO:0071704//GO:0019538//GO:0016310//GO:0009987	cellular macromolecule metabolic process//metabolic process//phosphorus metabolic process//protein phosphorylation//phosphate-containing compound metabolic process//macromolecule modification//primary metabolic process//biological_process//protein modification process//macromolecule metabolic process//cellular protein metabolic process//cellular metabolic process//organic substance metabolic proc…	--	--	GO:0035639//GO:0032555//GO:0016772//GO:0016740//GO:0016773//GO:0003824//GO:0032549//GO:0001883//GO:0005488//GO:0043167//GO:0016301//GO:0017076//GO:0043168//GO:0032550//GO:0030554//GO:0003674//GO:0032553//GO:0001882//GO:0097159//GO:0000166//GO:0032559//GO:0004672//GO:0005524	purine ribonucleoside triphosphate binding//purine ribonucleotide binding//transferase activity, transferring phosphorus-containing groups//transferase activity//phosphotransferase activity, alcohol group as acceptor//catalytic activity//ribonucleoside binding//purine nucleoside binding//binding//ion binding//kinase activity//purine nucleotide binding//anion binding//purine ribonucleoside binding…
Csa1G084330	uncharacterized LOC101213858	http://www.genome.jp/dbget-bin/www_bget?csv:101213858	--	--	--	--	GO:0046914//GO:0003674//GO:0008270//GO:0046872//GO:0043167//GO:0043169//GO:0005488	transition metal ion binding//molecular_function//zinc ion binding//metal ion binding//ion binding//cation binding//binding
Csa1G086900	MLO-like protein 3-like; K08472 mlo protein	http://www.genome.jp/dbget-bin/www_bget?csv:101225468	GO:0009987//GO:0008219//GO:0016265//GO:0008150	cellular process//cell death//death//biological_process	GO:0005575//GO:0031224//GO:0044425//GO:0016021//GO:0016020	cellular_component//intrinsic to membrane//membrane part//integral to membrane//membrane	--	--
Csa1G088450	LOB domain-containing protein 11-like	http://www.genome.jp/dbget-bin/www_bget?csv:101223258	--	--	--	--	--	--
Csa1G095020	probable glucuronoxylan glucuronosyltransferase F8H-like	http://www.genome.jp/dbget-bin/www_bget?csv:101223209	--	--	GO:0016020//GO:0005575	membrane//cellular_component	--	--
Csa1G096640	receptor-like serine/threonine-protein kinase ALE2-like	http://www.genome.jp/dbget-bin/www_bget?csv:101210578	GO:0044260//GO:0006796//GO:0006793//GO:0008152//GO:0006468//GO:0043412//GO:0044238//GO:0006464//GO:0008150//GO:0043170//GO:0044237//GO:0071704//GO:0044267//GO:0009987//GO:0016310//GO:0019538	cellular macromolecule metabolic process//phosphate-containing compound metabolic process//phosphorus metabolic process//metabolic process//protein phosphorylation//macromolecule modification//primary metabolic process//protein modification process//biological_process//macromolecule metabolic process//cellular metabolic process//organic substance metabolic process//cellular protein metabolic proc…	--	--	GO:0032555//GO:0016772//GO:0035639//GO:0016740//GO:0016773//GO:0005488//GO:0001883//GO:0032549//GO:0043167//GO:0003824//GO:0043168//GO:0016301//GO:0017076//GO:0000166//GO:0032553//GO:0032550//GO:0030554//GO:0003674//GO:0097159//GO:0001882//GO:0032559//GO:0005524//GO:0004672	purine ribonucleotide binding//transferase activity, transferring phosphorus-containing groups//purine ribonucleoside triphosphate binding//transferase activity//phosphotransferase activity, alcohol group as acceptor//binding//purine nucleoside binding//ribonucleoside binding//ion binding//catalytic activity//anion binding//kinase activity//purine nucleotide binding//nucleotide binding//ribonucle…
Csa1G097700	uncharacterized LOC101218484	http://www.genome.jp/dbget-bin/www_bget?csv:101218484	--	--	--	--	GO:0005515//GO:0051082//GO:0003674//GO:0031072//GO:0005488	protein binding//unfolded protein binding//molecular_function//heat shock protein binding//binding
Csa1G097750	--	--	--	--	--	--	--	--
Csa1G120450	bifunctional monodehydroascorbate reductase and carbonic anhydrase nectarin-3-like; K01674 carbonic anhydrase [EC:4.2.1.1]	http://www.genome.jp/dbget-bin/www_bget?csv:101232731	--	--	--	--	--	--
Csa1G126040	--	--	GO:0055114//GO:0008152//GO:0008150	oxidation-reduction process//metabolic process//biological_process	--	--	GO:0016668//GO:0003674//GO:0016667//GO:0016651//GO:0003824//GO:0016491//GO:0047134	oxidoreductase activity, acting on a sulfur group of donors, NAD or NADP as acceptor//molecular_function//oxidoreductase activity, acting on a sulfur group of donors//oxidoreductase activity, acting on NADH or NADPH//catalytic activity//oxidoreductase activity//protein-disulfide reductase activity
Csa1G126050	ubiquitin-like protein 5-like; K13113 ubiquitin-like protein 5	http://www.genome.jp/dbget-bin/www_bget?csv:101215437	--	--	--	--	GO:0003674//GO:0005515//GO:0005488	molecular_function//protein binding//binding
Csa1G132110	uncharacterized LOC101217269	http://www.genome.jp/dbget-bin/www_bget?csv:101217269	GO:0051234//GO:0006810//GO:0051179//GO:0008150//GO:0016192	establishment of localization//transport//localization//biological_process//vesicle-mediated transport	GO:0016020//GO:0044425//GO:0005575//GO:0031224//GO:0016021	membrane//membrane part//cellular_component//intrinsic to membrane//integral to membrane	--	--
Csa1G132160	CSPAO; pheophorbide a oxygenase, chloroplastic-like; K13071 pheophorbide a oxygenase [EC:1.14.12.20]	http://www.genome.jp/dbget-bin/www_bget?csv:101217499	GO:0008150//GO:0008152//GO:0055114	biological_process//metabolic process//oxidation-reduction process	--	--	GO:0004497//GO:0051537//GO:0010277//GO:0051536//GO:0003674//GO:0016703//GO:0016491//GO:0003824//GO:0051540//GO:0005488//GO:0016701	monooxygenase activity//2 iron, 2 sulfur cluster binding//chlorophyllide a oxygenase [overall] activity//iron-sulfur cluster binding//molecular_function//oxidoreductase activity, acting on single donors with incorporation of molecular oxygen, incorporation of one atom of oxygen (internal monooxygenases or internal mixed function oxidases)//oxidoreductase activity//catalytic activity//metal cluste…
Csa1G132710	cyclin-dependent kinases regulatory subunit 2-like; K02219 cyclin-dependent kinase regulatory subunit CKS1	http://www.genome.jp/dbget-bin/www_bget?csv:101204120	GO:0008150//GO:0009987//GO:0007049	biological_process//cellular process//cell cycle	--	--	GO:0019887//GO:0030234//GO:0016538//GO:0019207//GO:0003674	protein kinase regulator activity//enzyme regulator activity//cyclin-dependent protein kinase regulator activity//kinase regulator activity//molecular_function
Csa1G145880	pentatricopeptide repeat-containing protein At2g27610-like	http://www.genome.jp/dbget-bin/www_bget?csv:101206035	--	--	--	--	--	--
Csa1G145920	serine carboxypeptidase-like 51-like; K09646 serine carboxypeptidase 1 [EC:3.4.16.-]	http://www.genome.jp/dbget-bin/www_bget?csv:101220744	GO:0044238//GO:0008150//GO:0008152//GO:0006508//GO:0019538//GO:0043170//GO:0071704	primary metabolic process//biological_process//metabolic process//proteolysis//protein metabolic process//macromolecule metabolic process//organic substance metabolic process	GO:0043227//GO:0043226//GO:0043231//GO:0043229//GO:0044464//GO:0044424//GO:0005634//GO:0005623//GO:0005575//GO:0005622	membrane-bounded organelle//organelle//intracellular membrane-bounded organelle//intracellular organelle//cell part//intracellular part//nucleus//cell//cellular_component//intracellular	GO:0016787//GO:0070008//GO:0008236//GO:0008238//GO:0005488//GO:0003824//GO:0004185//GO:0003676//GO:0004180//GO:0008233//GO:0003677//GO:0017171//GO:0070011//GO:0003674//GO:0097159	hydrolase activity//serine-type exopeptidase activity//serine-type peptidase activity//exopeptidase activity//binding//catalytic activity//serine-type carboxypeptidase activity//nucleic acid binding//carboxypeptidase activity//peptidase activity//DNA binding//serine hydrolase activity//peptidase activity, acting on L-amino acid peptides//molecular_function//organic cyclic compound binding
Csa1G152500	CBS domain-containing protein CBSX1, chloroplastic-like	http://www.genome.jp/dbget-bin/www_bget?csv:101202997	--	--	--	--	GO:0003674//GO:0005515//GO:0005488	molecular_function//protein binding//binding
Csa1G153560	--	--	--	--	--	--	--	--
Csa1G166810	uncharacterized LOC101208386	http://www.genome.jp/dbget-bin/www_bget?csv:101208386	--	--	--	--	--	--
Csa1G168870	NAC domain-containing protein 89-like	http://www.genome.jp/dbget-bin/www_bget?csv:101211408	GO:0065007//GO:0009059//GO:0009889//GO:0034654//GO:2000112//GO:0009058//GO:0031323//GO:0034641//GO:0009987//GO:0044271//GO:0043170//GO:0034645//GO:0050794//GO:0006355//GO:0050789//GO:0071704//GO:0051171//GO:0006351//GO:0044237//GO:0019222//GO:0044238//GO:0090304//GO:0006807//GO:0010467//GO:0019438//GO:0046483//GO:0006725//GO:0051252//GO:0060255//GO:0006139//GO:0018130//GO:0008150//GO:2001141//GO:…	biological regulation//macromolecule biosynthetic process//regulation of biosynthetic process//nucleobase-containing compound biosynthetic process//regulation of cellular macromolecule biosynthetic process//biosynthetic process//regulation of cellular metabolic process//cellular nitrogen compound metabolic process//cellular process//cellular nitrogen compound biosynthetic process//macromolecule m…	--	--	GO:0097159//GO:0003674//GO:0005488//GO:0003677//GO:0003676	organic cyclic compound binding//molecular_function//binding//DNA binding//nucleic acid binding
Csa1G169950	pentatricopeptide repeat-containing protein At1g05750, chloroplastic-like	http://www.genome.jp/dbget-bin/www_bget?csv:101212377	--	--	--	--	--	--
Csa1G170000	BTB/POZ domain-containing protein At5g47800-like	http://www.genome.jp/dbget-bin/www_bget?csv:101212861	GO:0009314//GO:0051234//GO:0015672//GO:0006810//GO:0006812//GO:0009628//GO:0008150//GO:0051179//GO:0009416//GO:0050896//GO:0006813//GO:0030001//GO:0006811	response to radiation//establishment of localization//monovalent inorganic cation transport//transport//cation transport//response to abiotic stimulus//biological_process//localization//response to light stimulus//response to stimulus//potassium ion transport//metal ion transport//ion transport	GO:0034703//GO:0031226//GO:0008076//GO:0034702//GO:0044459//GO:0034705//GO:0032991//GO:0071944//GO:0005886//GO:0044464//GO:0016020//GO:0043234//GO:0005575//GO:0031224//GO:0044425//GO:0005887//GO:0016021//GO:0005623	cation channel complex//intrinsic to plasma membrane//voltage-gated potassium channel complex//ion channel complex//plasma membrane part//potassium channel complex//macromolecular complex//cell periphery//plasma membrane//cell part//membrane//protein complex//cellular_component//intrinsic to membrane//membrane part//integral to plasma membrane//integral to membrane//cell	GO:0046873//GO:0022838//GO:0008324//GO:0022857//GO:0022843//GO:0005244//GO:0015079//GO:0015075//GO:0005215//GO:0022891//GO:0022832//GO:0022839//GO:0004871//GO:0005267//GO:0022890//GO:0015077//GO:0003674//GO:0005216//GO:0022892//GO:0022803//GO:0005261//GO:0005249//GO:0060089//GO:0022836//GO:0015267	metal ion transmembrane transporter activity//substrate-specific channel activity//cation transmembrane transporter activity//transmembrane transporter activity//voltage-gated cation channel activity//voltage-gated ion channel activity//potassium ion transmembrane transporter activity//ion transmembrane transporter activity//transporter activity//substrate-specific transmembrane transporter activ…
Csa1G173140	pentatricopeptide repeat-containing protein At4g16390, chloroplastic-like	http://www.genome.jp/dbget-bin/www_bget?csv:101213183	GO:0008150//GO:0008152	biological_process//metabolic process	GO:0044421//GO:0044216//GO:0044217//GO:0043245//GO:0043657//GO:0033643//GO:0005576//GO:0044215//GO:0018995//GO:0005575	extracellular region part//other organism cell//other organism part//extraorganismal space//host cell//host cell part//extracellular region//other organism//host//cellular_component	GO:0003824//GO:0016846//GO:0016829//GO:0003674	catalytic activity//carbon-sulfur lyase activity//lyase activity//molecular_function
Csa1G173170	two-pore potassium channel 1-like; K05389 potassium channel subfamily K, other eukaryote	http://www.genome.jp/dbget-bin/www_bget?csv:101214791	GO:0006811//GO:0009987//GO:0055085//GO:0006810//GO:0051234//GO:0051179//GO:0008150	ion transport//cellular process//transmembrane transport//transport//establishment of localization//localization//biological_process	GO:0005575//GO:0016020	cellular_component//membrane	GO:0005216//GO:0003674//GO:0004871//GO:0022839//GO:0022836//GO:0015267//GO:0060089//GO:0022803//GO:0015276//GO:0005231//GO:0022892//GO:0004888//GO:0008066//GO:0005234//GO:0004872//GO:0022834//GO:0022857//GO:0022838//GO:0004970//GO:0022891//GO:0005215//GO:0015075//GO:0038023//GO:0005230	ion channel activity//molecular_function//signal transducer activity//ion gated channel activity//gated channel activity//channel activity//molecular transducer activity//passive transmembrane transporter activity//ligand-gated ion channel activity//excitatory extracellular ligand-gated ion channel activity//substrate-specific transporter activity//transmembrane signaling receptor activity//gluta…
Csa1G173190	--	--	GO:0010628//GO:0034613//GO:0015031//GO:0009059//GO:0023052//GO:0031325//GO:0065007//GO:0051641//GO:0009058//GO:0031323//GO:0009987//GO:0034641//GO:0009893//GO:0009889//GO:2000112//GO:0034654//GO:0006261//GO:0006355//GO:0044271//GO:0034645//GO:0043170//GO:0046907//GO:0051649//GO:0050794//GO:0070727//GO:0071704//GO:0051171//GO:0006351//GO:0044237//GO:0031328//GO:0051716//GO:0008104//GO:0010604//GO:…	positive regulation of gene expression//cellular protein localization//protein transport//macromolecule biosynthetic process//signaling//positive regulation of cellular metabolic process//biological regulation//cellular localization//biosynthetic process//regulation of cellular metabolic process//cellular process//cellular nitrogen compound metabolic process//positive regulation of metabolic proc…	GO:0044424//GO:0005623//GO:0005634//GO:0005575//GO:0005622//GO:0043226//GO:0043227//GO:0043231//GO:0043229//GO:0044464	intracellular part//cell//nucleus//cellular_component//intracellular//organelle//membrane-bounded organelle//intracellular membrane-bounded organelle//intracellular organelle//cell part	GO:0097159//GO:0003674//GO:0005488//GO:0003677//GO:0003676	organic cyclic compound binding//molecular_function//binding//DNA binding//nucleic acid binding
Csa1G180750	oligopeptide transporter 3-like	http://www.genome.jp/dbget-bin/www_bget?csv:101214148	GO:0051179//GO:0008150//GO:0009405//GO:0016032//GO:0051234//GO:0006810//GO:0044419//GO:0044403//GO:0051704//GO:0055085//GO:0009987	localization//biological_process//pathogenesis//viral reproduction//establishment of localization//transport//interspecies interaction between organisms//symbiosis, encompassing mutualism through parasitism//multi-organism process//transmembrane transport//cellular process	GO:0044423//GO:0005576//GO:0005575//GO:0019012	virion part//extracellular region//cellular_component//virion	GO:0005488//GO:0005515//GO:0003674	binding//protein binding//molecular_function
Csa1G181330	galactinol synthase 2-like; K18819 inositol 3-alpha-galactosyltransferase [EC:2.4.1.123]	http://www.genome.jp/dbget-bin/www_bget?csv:101226940	GO:0009059//GO:0019538//GO:0009058//GO:0009987//GO:0034645//GO:0043170//GO:0005975//GO:0006486//GO:0044267//GO:0071704//GO:0044237//GO:0044238//GO:0009100//GO:0043412//GO:0043413//GO:0008150//GO:0006464//GO:0044249//GO:0044260//GO:0070085//GO:0009101//GO:0008152	macromolecule biosynthetic process//protein metabolic process//biosynthetic process//cellular process//cellular macromolecule biosynthetic process//macromolecule metabolic process//carbohydrate metabolic process//protein glycosylation//cellular protein metabolic process//organic substance metabolic process//cellular metabolic process//primary metabolic process//glycoprotein metabolic process//mac…	--	--	GO:0003674//GO:0003824//GO:0016740//GO:0016757	molecular_function//catalytic activity//transferase activity//transferase activity, transferring glycosyl groups
Csa1G183580	cysteine proteinase inhibitor 5-like; K13899 cystatin-C	http://www.genome.jp/dbget-bin/www_bget?csv:101225188	--	--	--	--	GO:0004857//GO:0003674//GO:0004869//GO:0061135//GO:0030234//GO:0004866//GO:0030414//GO:0061134	enzyme inhibitor activity//molecular_function//cysteine-type endopeptidase inhibitor activity//endopeptidase regulator activity//enzyme regulator activity//endopeptidase inhibitor activity//peptidase inhibitor activity//peptidase regulator activity
Csa1G186610	tonoplast dicarboxylate transporter-like; K14445 solute carrier family 13 (sodium-dependent dicarboxylate transporter), member 2/3/5	http://www.genome.jp/dbget-bin/www_bget?csv:101227746	GO:0009987//GO:0055085//GO:0030001//GO:0006811//GO:0006814//GO:0008150//GO:0051179//GO:0015672//GO:0051234//GO:0006810//GO:0006812	cellular process//transmembrane transport//metal ion transport//ion transport//sodium ion transport//biological_process//localization//monovalent inorganic cation transport//establishment of localization//transport//cation transport	GO:0016021//GO:0044425//GO:0005575//GO:0031224//GO:0016020	integral to membrane//membrane part//cellular_component//intrinsic to membrane//membrane	GO:0003674//GO:0005215	molecular_function//transporter activity
Csa1G186620	--	--	--	--	--	--	--	--
Csa1G186630	BAG family molecular chaperone regulator 5, mitochondrial-like	http://www.genome.jp/dbget-bin/www_bget?csv:101227513	--	--	--	--	GO:0051087//GO:0005488//GO:0003674//GO:0005515	chaperone binding//binding//molecular_function//protein binding
Csa1G186640	early nodulin-like protein 2-like	http://www.genome.jp/dbget-bin/www_bget?csv:101219878	--	--	--	--	GO:0046872//GO:0043167//GO:0005488//GO:0043169//GO:0009055//GO:0046914//GO:0005507//GO:0003674	metal ion binding//ion binding//binding//cation binding//electron carrier activity//transition metal ion binding//copper ion binding//molecular_function
Csa1G212830	flavonol synthase/flavanone 3-hydroxylase-like	http://www.genome.jp/dbget-bin/www_bget?csv:101205523	GO:0055114//GO:0008152//GO:0008150	oxidation-reduction process//metabolic process//biological_process	--	--	GO:0051213//GO:0003674//GO:0016706//GO:0016491//GO:0016705//GO:0003824	dioxygenase activity//molecular_function//oxidoreductase activity, acting on paired donors, with incorporation or reduction of molecular oxygen, 2-oxoglutarate as one donor, and incorporation of one atom each of oxygen into both donors//oxidoreductase activity//oxidoreductase activity, acting on paired donors, with incorporation or reduction of molecular oxygen//catalytic activity
Csa1G224880	ADIPOR-like receptor CG5315-like; K07297 adiponectin receptor	http://www.genome.jp/dbget-bin/www_bget?csv:101221256	--	--	GO:0016020//GO:0016021//GO:0031224//GO:0005575//GO:0044425	membrane//integral to membrane//intrinsic to membrane//cellular_component//membrane part	--	--
Csa1G229500	AGA3; probable galactinol--sucrose galactosyltransferase 6-like; K06617 raffinose synthase [EC:2.4.1.82]	http://www.genome.jp/dbget-bin/www_bget?csv:101203037	GO:0008150//GO:0044238//GO:0008152//GO:0071704//GO:0005975	biological_process//primary metabolic process//metabolic process//organic substance metabolic process//carbohydrate metabolic process	--	--	GO:0003824//GO:0016787//GO:0004553//GO:0016798//GO:0003674	catalytic activity//hydrolase activity//hydrolase activity, hydrolyzing O-glycosyl compounds//hydrolase activity, acting on glycosyl bonds//molecular_function
Csa1G231530	auxin-responsive protein IAA29-like; K14484 auxin-responsive protein IAA	http://www.genome.jp/dbget-bin/www_bget?csv:101203761	GO:0080090//GO:0044249//GO:0044260//GO:0016070//GO:0008152//GO:0055114//GO:0010467//GO:0019438//GO:0046483//GO:0044238//GO:0090304//GO:0006807//GO:0019222//GO:0031326//GO:0010556//GO:0019219//GO:0032774//GO:0010468//GO:0006139//GO:0018130//GO:0008150//GO:2001141//GO:0006725//GO:0051252//GO:0060255//GO:0006355//GO:0050794//GO:0044271//GO:0043170//GO:0034645//GO:0006351//GO:0044237//GO:0071704//GO:…	regulation of primary metabolic process//cellular biosynthetic process//cellular macromolecule metabolic process//RNA metabolic process//metabolic process//oxidation-reduction process//gene expression//aromatic compound biosynthetic process//heterocycle metabolic process//primary metabolic process//nucleic acid metabolic process//nitrogen compound metabolic process//regulation of metabolic proces…	GO:0043226//GO:0043227//GO:0044423//GO:0043231//GO:0043229//GO:0044464//GO:0005575//GO:0019012//GO:0019028//GO:0005622//GO:0044424//GO:0005634//GO:0005623	organelle//membrane-bounded organelle//virion part//intracellular membrane-bounded organelle//intracellular organelle//cell part//cellular_component//virion//viral capsid//intracellular//intracellular part//nucleus//cell	GO:0016491//GO:0046872//GO:0043169//GO:0005488//GO:0043167//GO:0003824//GO:0005507//GO:0003674//GO:0046914//GO:0005515	oxidoreductase activity//metal ion binding//cation binding//binding//ion binding//catalytic activity//copper ion binding//molecular_function//transition metal ion binding//protein binding
Csa1G240590	heat stress transcription factor C-1-like; K09419 heat shock transcription factor, other eukaryote	http://www.genome.jp/dbget-bin/www_bget?csv:101211206	GO:0080090//GO:0044249//GO:0016070//GO:0044260//GO:0008152//GO:0010467//GO:0046483//GO:0019438//GO:0090304//GO:0044238//GO:0006807//GO:0019222//GO:0031326//GO:0010556//GO:0032774//GO:0010468//GO:0019219//GO:0006139//GO:0018130//GO:0008150//GO:2001141//GO:0006725//GO:0051252//GO:0060255//GO:0006355//GO:0050794//GO:0044271//GO:0043170//GO:0034645//GO:0044237//GO:0006351//GO:0051171//GO:0071704//GO:…	regulation of primary metabolic process//cellular biosynthetic process//RNA metabolic process//cellular macromolecule metabolic process//metabolic process//gene expression//heterocycle metabolic process//aromatic compound biosynthetic process//nucleic acid metabolic process//primary metabolic process//nitrogen compound metabolic process//regulation of metabolic process//regulation of cellular bio…	GO:0043227//GO:0043226//GO:0043231//GO:0043229//GO:0044464//GO:0005575//GO:0005622//GO:0044424//GO:0005634//GO:0005623	membrane-bounded organelle//organelle//intracellular membrane-bounded organelle//intracellular organelle//cell part//cellular_component//intracellular//intracellular part//nucleus//cell	GO:0003676//GO:0003677//GO:0005488//GO:0003700//GO:0001071//GO:0043565//GO:0003674//GO:0097159	nucleic acid binding//DNA binding//binding//sequence-specific DNA binding transcription factor activity//nucleic acid binding transcription factor activity//sequence-specific DNA binding//molecular_function//organic cyclic compound binding
Csa1G248110	probable polyol transporter 6-like	http://www.genome.jp/dbget-bin/www_bget?csv:101203182	GO:0051234//GO:0006810//GO:0008150//GO:0051179//GO:0009987//GO:0055085	establishment of localization//transport//biological_process//localization//cellular process//transmembrane transport	GO:0016020//GO:0044425//GO:0031224//GO:0005575//GO:0016021	membrane//membrane part//intrinsic to membrane//cellular_component//integral to membrane	GO:0022857//GO:0005215//GO:0003674	transmembrane transporter activity//transporter activity//molecular_function
Csa1G250130	probable chlorophyll(ide) b reductase NYC1, chloroplastic-like; K13606 chlorophyll(ide) b reductase [EC:1.1.1.294]	http://www.genome.jp/dbget-bin/www_bget?csv:101222986	GO:0008152//GO:0055114//GO:0008150	metabolic process//oxidation-reduction process//biological_process	--	--	GO:0003824//GO:0016491//GO:0003674	catalytic activity//oxidoreductase activity//molecular_function
Csa1G250150	proline-rich receptor-like protein kinase PERK1-like	http://www.genome.jp/dbget-bin/www_bget?csv:101222748	GO:0044238//GO:0043412//GO:0008150//GO:0006464//GO:0044260//GO:0006468//GO:0006793//GO:0008152//GO:0006796//GO:0019538//GO:0016310//GO:0009987//GO:0043170//GO:0044267//GO:0071704//GO:0044237	primary metabolic process//macromolecule modification//biological_process//protein modification process//cellular macromolecule metabolic process//protein phosphorylation//phosphorus metabolic process//metabolic process//phosphate-containing compound metabolic process//protein metabolic process//phosphorylation//cellular process//macromolecule metabolic process//cellular protein metabolic process…	GO:0016020//GO:0005575	membrane//cellular_component	GO:0016773//GO:0003824//GO:0043167//GO:0001883//GO:0032549//GO:0005488//GO:0035639//GO:0032555//GO:0016772//GO:0016740//GO:0032559//GO:0004672//GO:0005524//GO:0017076//GO:0016301//GO:0043168//GO:0001882//GO:0097159//GO:0032553//GO:0032550//GO:0030554//GO:0003674//GO:0000166	phosphotransferase activity, alcohol group as acceptor//catalytic activity//ion binding//purine nucleoside binding//ribonucleoside binding//binding//purine ribonucleoside triphosphate binding//purine ribonucleotide binding//transferase activity, transferring phosphorus-containing groups//transferase activity//adenyl ribonucleotide binding//protein kinase activity//ATP binding//purine nucleotide b…
Csa1G257360	uncharacterized LOC101207267	http://www.genome.jp/dbget-bin/www_bget?csv:101207267	--	--	--	--	--	--
Csa1G263960	S-norcoclaurine synthase 1-like	http://www.genome.jp/dbget-bin/www_bget?csv:101220236	--	--	--	--	--	--
Csa1G263970	flavonol synthase/flavanone 3-hydroxylase-like	http://www.genome.jp/dbget-bin/www_bget?csv:101205523	GO:0008150//GO:0008152//GO:0055114	biological_process//metabolic process//oxidation-reduction process	--	--	GO:0003824//GO:0016491//GO:0016705//GO:0016706//GO:0003674//GO:0051213	catalytic activity//oxidoreductase activity//oxidoreductase activity, acting on paired donors, with incorporation or reduction of molecular oxygen//oxidoreductase activity, acting on paired donors, with incorporation or reduction of molecular oxygen, 2-oxoglutarate as one donor, and incorporation of one atom each of oxygen into both donors//molecular_function//dioxygenase activity
Csa1G263990	uncharacterized LOC101217675	http://www.genome.jp/dbget-bin/www_bget?csv:101217675	GO:0055114//GO:0008152//GO:0008150//GO:0022900//GO:0044237//GO:0009987//GO:0006091	oxidation-reduction process//metabolic process//biological_process//electron transport chain//cellular metabolic process//cellular process//generation of precursor metabolites and energy	GO:0019031//GO:0016020//GO:0044423//GO:0044425//GO:0019012//GO:0031224//GO:0005575//GO:0016021	viral envelope//membrane//virion part//membrane part//virion//intrinsic to membrane//cellular_component//integral to membrane	GO:0009055//GO:0022857//GO:0008324//GO:0003824//GO:0005215//GO:0043167//GO:0005488//GO:0022891//GO:0015002//GO:0043169//GO:0046872//GO:0015075//GO:0016676//GO:0016491//GO:0016675//GO:0003674//GO:0022890//GO:0015077//GO:0004129//GO:0005507//GO:0005515//GO:0015078//GO:0022892//GO:0046914	electron carrier activity//transmembrane transporter activity//cation transmembrane transporter activity//catalytic activity//transporter activity//ion binding//binding//substrate-specific transmembrane transporter activity//heme-copper terminal oxidase activity//cation binding//metal ion binding//ion transmembrane transporter activity//oxidoreductase activity, acting on a heme group of donors, o…
Csa1G264010	uncharacterized LOC101205285	http://www.genome.jp/dbget-bin/www_bget?csv:101205285	--	--	--	--	GO:0005515//GO:0003674//GO:0005488	protein binding//molecular_function//binding
Csa1G264020	uncharacterized LOC101229924	http://www.genome.jp/dbget-bin/www_bget?csv:101229924	--	--	--	--	--	--
Csa1G264540	probable flavin-containing monooxygenase 1-like; K00485 dimethylaniline monooxygenase (N-oxide forming) [EC:1.14.13.8]	http://www.genome.jp/dbget-bin/www_bget?csv:101227438	GO:0008150//GO:0008152//GO:0055114	biological_process//metabolic process//oxidation-reduction process	--	--	GO:0004497//GO:0046914//GO:0050662//GO:0003674//GO:0048037//GO:0097159//GO:0016709//GO:0000166//GO:0050660//GO:0005507//GO:0043168//GO:0003824//GO:0043169//GO:0005488//GO:0043167//GO:0016705//GO:0046872//GO:0016491//GO:0004499//GO:0050661	monooxygenase activity//transition metal ion binding//coenzyme binding//molecular_function//cofactor binding//organic cyclic compound binding//oxidoreductase activity, acting on paired donors, with incorporation or reduction of molecular oxygen, NADH or NADPH as one donor, and incorporation of one atom of oxygen//nucleotide binding//flavin adenine dinucleotide binding//copper ion binding//anion b…
Csa1G264550	probable flavin-containing monooxygenase 1-like; K00485 dimethylaniline monooxygenase (N-oxide forming) [EC:1.14.13.8]	http://www.genome.jp/dbget-bin/www_bget?csv:101216337	GO:0055114//GO:0008152//GO:0008150	oxidation-reduction process//metabolic process//biological_process	--	--	GO:0043168//GO:0050660//GO:0000166//GO:0016709//GO:0097159//GO:0048037//GO:0003674//GO:0050662//GO:0004497//GO:0050661//GO:0004499//GO:0016491//GO:0016705//GO:0043167//GO:0005488//GO:0003824	anion binding//flavin adenine dinucleotide binding//nucleotide binding//oxidoreductase activity, acting on paired donors, with incorporation or reduction of molecular oxygen, NADH or NADPH as one donor, and incorporation of one atom of oxygen//organic cyclic compound binding//cofactor binding//molecular_function//coenzyme binding//monooxygenase activity//NADP binding//flavin-containing monooxygen…
Csa1G265640	--	--	--	--	--	--	--	--
Csa1G265650	uncharacterized LOC101227888	http://www.genome.jp/dbget-bin/www_bget?csv:101227888	--	--	--	--	--	--
Csa1G268280	putative lipocalin R877-like; K03098 apolipoprotein D and lipocalin family protein	http://www.genome.jp/dbget-bin/www_bget?csv:101213453	--	--	--	--	--	--
Csa1G269350	uncharacterized LOC101228749	http://www.genome.jp/dbget-bin/www_bget?csv:101228749	GO:0009987//GO:0051641//GO:0034613//GO:0015031//GO:0008104//GO:0070727//GO:0046907//GO:0051649//GO:0071702//GO:0008150//GO:0051179//GO:0051234//GO:0006810//GO:0006886//GO:0045184//GO:0033036	cellular process//cellular localization//cellular protein localization//protein transport//protein localization//cellular macromolecule localization//intracellular transport//establishment of localization in cell//organic substance transport//biological_process//localization//establishment of localization//transport//intracellular protein transport//establishment of protein localization//macromol…	GO:0005623//GO:0044424//GO:0005741//GO:0005740//GO:0031975//GO:0031090//GO:0005622//GO:0044446//GO:0005575//GO:0044422//GO:0016020//GO:0044464//GO:0044444//GO:0031966//GO:0043231//GO:0043229//GO:0043226//GO:0043227//GO:0005737//GO:0019867//GO:0005739//GO:0044429//GO:0031968//GO:0031967	cell//intracellular part//mitochondrial outer membrane//mitochondrial envelope//envelope//organelle membrane//intracellular//intracellular organelle part//cellular_component//organelle part//membrane//cell part//cytoplasmic part//mitochondrial membrane//intracellular membrane-bounded organelle//intracellular organelle//organelle//membrane-bounded organelle//cytoplasm//outer membrane//mitochondrio…	--	--
Csa1G269880	CBL-interacting serine/threonine-protein kinase 6-like	http://www.genome.jp/dbget-bin/www_bget?csv:101211847	GO:0005975//GO:0072330//GO:0043170//GO:0034645//GO:0050794//GO:0071704//GO:0044237//GO:0044267//GO:0005976//GO:0051716//GO:0044262//GO:0050789//GO:0009059//GO:0006629//GO:0023052//GO:0065007//GO:0009058//GO:0009987//GO:0016051//GO:0046394//GO:0016310//GO:0008610//GO:0019538//GO:0044283//GO:0006082//GO:0009103//GO:0033692//GO:0007165//GO:0044281//GO:0044249//GO:0044260//GO:0019752//GO:0006633//GO:…	carbohydrate metabolic process//monocarboxylic acid biosynthetic process//macromolecule metabolic process//cellular macromolecule biosynthetic process//regulation of cellular process//organic substance metabolic process//cellular metabolic process//cellular protein metabolic process//polysaccharide metabolic process//cellular response to stimulus//cellular carbohydrate metabolic process//regulati…	GO:0005575//GO:0016020	cellular_component//membrane	GO:0043168//GO:0017076//GO:0016301//GO:0000166//GO:0097159//GO:0001882//GO:0032550//GO:0003674//GO:0030554//GO:0032553//GO:0032559//GO:0004672//GO:0005524//GO:0032555//GO:0016772//GO:0035639//GO:0016740//GO:0016773//GO:0043167//GO:0032549//GO:0001883//GO:0005488//GO:0003824	anion binding//purine nucleotide binding//kinase activity//nucleotide binding//organic cyclic compound binding//nucleoside binding//purine ribonucleoside binding//molecular_function//adenyl nucleotide binding//ribonucleotide binding//adenyl ribonucleotide binding//protein kinase activity//ATP binding//purine ribonucleotide binding//transferase activity, transferring phosphorus-containing groups//…
Csa1G269890	--	--	--	--	--	--	--	--
Csa1G277980	--	--	--	--	GO:0016020//GO:0016021//GO:0031224//GO:0005575//GO:0044425	membrane//integral to membrane//intrinsic to membrane//cellular_component//membrane part	--	--
Csa1G294020	protein ECERIFERUM 3-like	http://www.genome.jp/dbget-bin/www_bget?csv:101217936	GO:0050896//GO:0007154//GO:0008150//GO:0006631//GO:0044238//GO:0044255//GO:0032787//GO:0043436//GO:0019752//GO:0006633//GO:0008152//GO:0055114//GO:0016053//GO:0044281//GO:0044249//GO:0007166//GO:0007165//GO:0009987//GO:0046394//GO:0009058//GO:0008610//GO:0044283//GO:0006082//GO:0007186//GO:0006629//GO:0023052//GO:0065007//GO:0044237//GO:0071704//GO:0050789//GO:0051716//GO:0072330//GO:0050794	response to stimulus//cell communication//biological_process//fatty acid metabolic process//primary metabolic process//cellular lipid metabolic process//monocarboxylic acid metabolic process//oxoacid metabolic process//carboxylic acid metabolic process//fatty acid biosynthetic process//metabolic process//oxidation-reduction process//organic acid biosynthetic process//small molecule metabolic proc…	GO:0016020//GO:0016021//GO:0044425//GO:0005575//GO:0031224	membrane//integral to membrane//membrane part//cellular_component//intrinsic to membrane	GO:0043169//GO:0005488//GO:0043167//GO:0003824//GO:0016491//GO:0038023//GO:0046872//GO:0004888//GO:0004872//GO:0016503//GO:0060089//GO:0046914//GO:0004930//GO:0003674//GO:0005506//GO:0004871	cation binding//binding//ion binding//catalytic activity//oxidoreductase activity//signaling receptor activity//metal ion binding//transmembrane signaling receptor activity//receptor activity//pheromone receptor activity//molecular transducer activity//transition metal ion binding//G-protein coupled receptor activity//molecular_function//iron ion binding//signal transducer activity
Csa1G294080	uncharacterized LOC101218172	http://www.genome.jp/dbget-bin/www_bget?csv:101218172	--	--	--	--	--	--
Csa1G306800	pentatricopeptide repeat-containing protein At1g08070-like	http://www.genome.jp/dbget-bin/www_bget?csv:101224601	GO:0044237//GO:0071704//GO:0006783//GO:0033013//GO:0042168//GO:0044271//GO:0006778//GO:0009987//GO:0034641//GO:0009058//GO:0033014//GO:0042440//GO:0008152//GO:0046148//GO:0051186//GO:0044249//GO:0006779//GO:0018130//GO:0008150//GO:0006725//GO:0051188//GO:0046483//GO:0019438//GO:0006807	cellular metabolic process//organic substance metabolic process//heme biosynthetic process//tetrapyrrole metabolic process//heme metabolic process//cellular nitrogen compound biosynthetic process//porphyrin-containing compound metabolic process//cellular process//cellular nitrogen compound metabolic process//biosynthetic process//tetrapyrrole biosynthetic process//pigment metabolic process//metab…	--	--	GO:0003674//GO:0016829//GO:0004325//GO:0003824	molecular_function//lyase activity//ferrochelatase activity//catalytic activity
Csa1G320370	pentatricopeptide repeat-containing protein At4g32430, mitochondrial-like	http://www.genome.jp/dbget-bin/www_bget?csv:101214187	--	--	--	--	--	--
Csa1G324870	uncharacterized LOC101206121	http://www.genome.jp/dbget-bin/www_bget?csv:101206121	--	--	--	--	--	--
Csa1G328400	HO1; heme oxygenase 1; K00510 heme oxygenase [EC:1.14.99.3]	http://www.genome.jp/dbget-bin/www_bget?csv:101214191	GO:0044248//GO:0071704//GO:0006787//GO:0044237//GO:0019439//GO:0033013//GO:0006778//GO:0042168//GO:0034641//GO:0009987//GO:0046700//GO:0006788//GO:0042440//GO:0044270//GO:0008152//GO:0055114//GO:0051186//GO:0051187//GO:0009056//GO:0033015//GO:0006725//GO:0008150//GO:0006807//GO:0046483	cellular catabolic process//organic substance metabolic process//porphyrin-containing compound catabolic process//cellular metabolic process//aromatic compound catabolic process//tetrapyrrole metabolic process//porphyrin-containing compound metabolic process//heme metabolic process//cellular nitrogen compound metabolic process//cellular process//heterocycle catabolic process//heme oxidation//pigm…	--	--	GO:0003674//GO:0004392//GO:0003824//GO:0016491//GO:0016705	molecular_function//heme oxygenase (decyclizing) activity//catalytic activity//oxidoreductase activity//oxidoreductase activity, acting on paired donors, with incorporation or reduction of molecular oxygen
Csa1G342430	uncharacterized LOC101222988	http://www.genome.jp/dbget-bin/www_bget?csv:101222988	--	--	--	--	--	--
Csa1G372010	aldehyde dehydrogenase family 2 member C4-like; K12355 coniferyl-aldehyde dehydrogenase [EC:1.2.1.68]	http://www.genome.jp/dbget-bin/www_bget?csv:101230897	GO:0044237//GO:0008152//GO:0008218//GO:0009987//GO:0008150//GO:0055114	cellular metabolic process//metabolic process//bioluminescence//cellular process//biological_process//oxidation-reduction process	--	--	GO:0016491//GO:0016627//GO:0003995//GO:0003674//GO:0003824	oxidoreductase activity//oxidoreductase activity, acting on the CH-CH group of donors//acyl-CoA dehydrogenase activity//molecular_function//catalytic activity
Csa1G407170	pentatricopeptide repeat-containing protein At5g55740, chloroplastic-like	http://www.genome.jp/dbget-bin/www_bget?csv:101209721	--	--	--	--	--	--
Csa1G411740	uncharacterized LOC101206063	http://www.genome.jp/dbget-bin/www_bget?csv:101206063	--	--	--	--	--	--
Csa1G420310	zinc finger protein CONSTANS-LIKE 5-like	http://www.genome.jp/dbget-bin/www_bget?csv:101214816	GO:0009987//GO:0009058//GO:0034654//GO:0006351//GO:0009451//GO:0071704//GO:0043170//GO:0032774//GO:0006139//GO:0008150//GO:0006725//GO:0010467//GO:0019438//GO:0046483//GO:0006807//GO:0034660//GO:0006399//GO:0044260//GO:0006400//GO:0016070//GO:0008033//GO:0034641//GO:0009059//GO:0044237//GO:0044271//GO:0034645//GO:0034470//GO:0018130//GO:0043412//GO:0044238//GO:0090304//GO:0008152//GO:0006396//GO:…	cellular process//biosynthetic process//nucleobase-containing compound biosynthetic process//transcription, DNA-dependent//RNA modification//organic substance metabolic process//macromolecule metabolic process//RNA biosynthetic process//nucleobase-containing compound metabolic process//biological_process//cellular aromatic compound metabolic process//gene expression//aromatic compound biosyntheti…	GO:0005623//GO:0005575//GO:0005622//GO:0044464	cell//cellular_component//intracellular//cell part	GO:0016423//GO:0005515//GO:0008757//GO:0003674//GO:0008173//GO:0043169//GO:0016741//GO:0003824//GO:0046872//GO:0003676//GO:0003677//GO:0016772//GO:0008176//GO:0016779//GO:0003899//GO:0046914//GO:0008270//GO:0034062//GO:0097159//GO:0008168//GO:0005488//GO:0043167//GO:0008175//GO:0016740	tRNA (guanine) methyltransferase activity//protein binding//S-adenosylmethionine-dependent methyltransferase activity//molecular_function//RNA methyltransferase activity//cation binding//transferase activity, transferring one-carbon groups//catalytic activity//metal ion binding//nucleic acid binding//DNA binding//transferase activity, transferring phosphorus-containing groups//tRNA (guanine-N7-)-…
Csa1G420320	zinc finger protein CONSTANS-LIKE 5-like	http://www.genome.jp/dbget-bin/www_bget?csv:101214816	--	--	GO:0005575//GO:0005623//GO:0044464//GO:0005622	cellular_component//cell//cell part//intracellular	GO:0046872//GO:0043169//GO:0003674//GO:0005515//GO:0043167//GO:0005488//GO:0008270//GO:0046914	metal ion binding//cation binding//molecular_function//protein binding//ion binding//binding//zinc ion binding//transition metal ion binding
Csa1G422980	probable xyloglucan endotransglucosylase/hydrolase protein 23-like; K08235 xyloglucan:xyloglucosyl transferase [EC:2.4.1.207]	http://www.genome.jp/dbget-bin/www_bget?csv:101208975	GO:0044238//GO:0008152//GO:0044042//GO:0044264//GO:0006073//GO:0044237//GO:0008150//GO:0044260//GO:0009987//GO:0043170//GO:0005975//GO:0005976//GO:0044262//GO:0071704	primary metabolic process//metabolic process//glucan metabolic process//cellular polysaccharide metabolic process//cellular glucan metabolic process//cellular metabolic process//biological_process//cellular macromolecule metabolic process//cellular process//macromolecule metabolic process//carbohydrate metabolic process//polysaccharide metabolic process//cellular carbohydrate metabolic process//o…	GO:0044464//GO:0071944//GO:0030312//GO:0005618//GO:0005576//GO:0048046//GO:0005623//GO:0005575	cell part//cell periphery//external encapsulating structure//cell wall//extracellular region//apoplast//cell//cellular_component	GO:0016787//GO:0016740//GO:0016757//GO:0016798//GO:0003824//GO:0004553//GO:0016762//GO:0003674//GO:0016758	hydrolase activity//transferase activity//transferase activity, transferring glycosyl groups//hydrolase activity, acting on glycosyl bonds//catalytic activity//hydrolase activity, hydrolyzing O-glycosyl compounds//xyloglucan:xyloglucosyl transferase activity//molecular_function//transferase activity, transferring hexosyl groups
Csa1G423150	NADPH--cytochrome P450 reductase 2-like; K00327 NADPH-ferrihemoprotein reductase [EC:1.6.2.4]	http://www.genome.jp/dbget-bin/www_bget?csv:101219498	GO:0008150//GO:0055114//GO:0008152	biological_process//oxidation-reduction process//metabolic process	--	--	GO:0010181//GO:0003824//GO:0050662//GO:0048037//GO:0003674//GO:0032553//GO:0016491//GO:0043167//GO:0005488//GO:0043168//GO:0097159//GO:0000166	FMN binding//catalytic activity//coenzyme binding//cofactor binding//molecular_function//ribonucleotide binding//oxidoreductase activity//ion binding//binding//anion binding//organic cyclic compound binding//nucleotide binding
Csa1G434140	galacturonokinase-like; K18677 galacturonokinase [EC:2.7.1.44]	http://www.genome.jp/dbget-bin/www_bget?csv:101227672	--	--	--	--	GO:0043168//GO:0000166//GO:0032550//GO:0097159//GO:0001882//GO:0032559//GO:0035639//GO:0032555//GO:0005488//GO:0032549//GO:0043167//GO:0017076//GO:0032553//GO:0003674//GO:0030554//GO:0005524//GO:0001883	anion binding//nucleotide binding//purine ribonucleoside binding//organic cyclic compound binding//nucleoside binding//adenyl ribonucleotide binding//purine ribonucleoside triphosphate binding//purine ribonucleotide binding//binding//ribonucleoside binding//ion binding//purine nucleotide binding//ribonucleotide binding//molecular_function//adenyl nucleotide binding//ATP binding//purine nucleoside…
Csa1G434160	uncharacterized LOC101205533	http://www.genome.jp/dbget-bin/www_bget?csv:101205533	--	--	--	--	--	--
Csa1G435710	uncharacterized LOC101204886	http://www.genome.jp/dbget-bin/www_bget?csv:101204886	--	--	--	--	GO:0016874//GO:0003824//GO:0019787//GO:0043169//GO:0046872//GO:0003674//GO:0004842//GO:0016879//GO:0005488//GO:0043167//GO:0008270//GO:0016881//GO:0046914	ligase activity//catalytic activity//small conjugating protein ligase activity//cation binding//metal ion binding//molecular_function//ubiquitin-protein ligase activity//ligase activity, forming carbon-nitrogen bonds//binding//ion binding//zinc ion binding//acid-amino acid ligase activity//transition metal ion binding
Csa1G435780	F-box/kelch-repeat protein At1g30090-like	http://www.genome.jp/dbget-bin/www_bget?csv:101204003	--	--	--	--	GO:0005488//GO:0003674//GO:0005515	binding//molecular_function//protein binding
Csa1G439330	calcyclin-binding protein-like; K04507 calcyclin binding protein	http://www.genome.jp/dbget-bin/www_bget?csv:101214674	--	--	--	--	--	--
Csa1G448920	potassium channel KAT1-like	http://www.genome.jp/dbget-bin/www_bget?csv:101215858	GO:0040011//GO:0006810//GO:0051821//GO:0051704//GO:0044403//GO:0055085//GO:0051179//GO:0051701//GO:0008150//GO:0051234//GO:0044419//GO:0019089//GO:0044007//GO:0016032//GO:0009987//GO:0006811	locomotion//transport//dissemination or transmission of organism from other organism involved in symbiotic interaction//multi-organism process//symbiosis, encompassing mutualism through parasitism//transmembrane transport//localization//interaction with host//biological_process//establishment of localization//interspecies interaction between organisms//transmission of virus//dissemination or tran…	GO:0016020//GO:0005575	membrane//cellular_component	GO:0022891//GO:0005215//GO:0015075//GO:0022838//GO:0005216//GO:0022857//GO:0015267//GO:0022892//GO:0022803//GO:0003674	substrate-specific transmembrane transporter activity//transporter activity//ion transmembrane transporter activity//substrate-specific channel activity//ion channel activity//transmembrane transporter activity//channel activity//substrate-specific transporter activity//passive transmembrane transporter activity//molecular_function
Csa1G464550	exonuclease 1-like; K10746 exonuclease 1 [EC:3.1.-.-]	http://www.genome.jp/dbget-bin/www_bget?csv:101214177	GO:0006807//GO:0046483//GO:0050896//GO:0006725//GO:0006139//GO:0008150//GO:0006259//GO:0044260//GO:0009987//GO:0006950//GO:0043170//GO:0071704//GO:0044238//GO:0090304//GO:0006974//GO:0006281//GO:0008152//GO:0033554//GO:0034641//GO:0044237//GO:0051716	nitrogen compound metabolic process//heterocycle metabolic process//response to stimulus//cellular aromatic compound metabolic process//nucleobase-containing compound metabolic process//biological_process//DNA metabolic process//cellular macromolecule metabolic process//cellular process//response to stress//macromolecule metabolic process//organic substance metabolic process//primary metabolic pr…	--	--	GO:0016788//GO:0003824//GO:0003677//GO:0003676//GO:0005515//GO:0004518//GO:0003674//GO:0016787//GO:0005488//GO:0097159	hydrolase activity, acting on ester bonds//catalytic activity//DNA binding//nucleic acid binding//protein binding//nuclease activity//molecular_function//hydrolase activity//binding//organic cyclic compound binding
Csa1G467120	serine/threonine-protein kinase CTR1-like	http://www.genome.jp/dbget-bin/www_bget?csv:101205123	GO:0046483//GO:0006807//GO:0008150//GO:0006139//GO:0006725//GO:0044260//GO:0006259//GO:0006265//GO:0019538//GO:0009987//GO:0043170//GO:0071704//GO:0043412//GO:0044238//GO:0090304//GO:0006464//GO:0006793//GO:0008152//GO:0006468//GO:0006796//GO:0016310//GO:0034641//GO:0071103//GO:0044267//GO:0044237	heterocycle metabolic process//nitrogen compound metabolic process//biological_process//nucleobase-containing compound metabolic process//cellular aromatic compound metabolic process//cellular macromolecule metabolic process//DNA metabolic process//DNA topological change//protein metabolic process//cellular process//macromolecule metabolic process//organic substance metabolic process//macromolecu…	GO:0043229//GO:0000781//GO:0005694//GO:0043228//GO:0005623//GO:0044427//GO:0044424//GO:0005575//GO:0043226//GO:0044464//GO:0044422//GO:0005622//GO:0043232//GO:0044446	intracellular organelle//chromosome, telomeric region//chromosome//non-membrane-bounded organelle//cell//chromosomal part//intracellular part//cellular_component//organelle//cell part//organelle part//intracellular//intracellular non-membrane-bounded organelle//intracellular organelle part	GO:0008094//GO:0003824//GO:0003916//GO:0001883//GO:0003918//GO:0016772//GO:0042162//GO:0016817//GO:0003676//GO:0003677//GO:0042623//GO:0005515//GO:0005524//GO:0016301//GO:0017076//GO:0032553//GO:0030554//GO:0003674//GO:0016773//GO:0016787//GO:0016818//GO:0005488//GO:0032549//GO:0043167//GO:0032555//GO:0035639//GO:0016740//GO:0032559//GO:0017111//GO:0016853//GO:0004672//GO:0016462//GO:0043168//GO:…	DNA-dependent ATPase activity//catalytic activity//DNA topoisomerase activity//purine nucleoside binding//DNA topoisomerase (ATP-hydrolyzing) activity//transferase activity, transferring phosphorus-containing groups//telomeric DNA binding//hydrolase activity, acting on acid anhydrides//nucleic acid binding//DNA binding//ATPase activity, coupled//protein binding//ATP binding//kinase activity//puri…
Csa1G467720	U-box domain-containing protein 17-like	http://www.genome.jp/dbget-bin/www_bget?csv:101204151	GO:0008152//GO:0044238//GO:0043412//GO:0006464//GO:0044237//GO:0044267//GO:0032446//GO:0044260//GO:0070647//GO:0008150//GO:0043170//GO:0016567//GO:0071704//GO:0009987//GO:0019538	metabolic process//primary metabolic process//macromolecule modification//protein modification process//cellular metabolic process//cellular protein metabolic process//protein modification by small protein conjugation//cellular macromolecule metabolic process//protein modification by small protein conjugation or removal//biological_process//macromolecule metabolic process//protein ubiquitination/…	GO:0043234//GO:0044464//GO:0005622//GO:0000151//GO:0032991//GO:0005575//GO:0044424//GO:0005623	protein complex//cell part//intracellular//ubiquitin ligase complex//macromolecular complex//cellular_component//intracellular part//cell	GO:0016879//GO:0004842//GO:0005488//GO:0016881//GO:0016874//GO:0019787//GO:0003824//GO:0003674//GO:0005515	ligase activity, forming carbon-nitrogen bonds//ubiquitin-protein ligase activity//binding//acid-amino acid ligase activity//ligase activity//small conjugating protein ligase activity//catalytic activity//molecular_function//protein binding
Csa1G470300	--	--	GO:0009059//GO:0034641//GO:0006353//GO:0034645//GO:0044271//GO:0044237//GO:0090304//GO:0044238//GO:0018130//GO:0044249//GO:0008152//GO:0034654//GO:0009987//GO:0009058//GO:0043170//GO:0006351//GO:0071704//GO:0046483//GO:0019438//GO:0010467//GO:0006807//GO:0008150//GO:0006139//GO:0006725//GO:0032774//GO:0016070//GO:0044260	macromolecule biosynthetic process//cellular nitrogen compound metabolic process//transcription termination, DNA-dependent//cellular macromolecule biosynthetic process//cellular nitrogen compound biosynthetic process//cellular metabolic process//nucleic acid metabolic process//primary metabolic process//heterocycle biosynthetic process//cellular biosynthetic process//metabolic process//nucleobase…	--	--	GO:0097159//GO:0005488//GO:0003674//GO:0003676	organic cyclic compound binding//binding//molecular_function//nucleic acid binding
Csa1G470380	DUF246 domain-containing protein At1g04910-like	http://www.genome.jp/dbget-bin/www_bget?csv:101208265	--	--	GO:0044423//GO:0019031//GO:0019012//GO:0005575	virion part//viral envelope//virion//cellular_component	--	--
Csa1G470420	CBL-interacting protein kinase 5-like	http://www.genome.jp/dbget-bin/www_bget?csv:101206082	GO:0051701//GO:0008150//GO:0007154//GO:0050896//GO:0044255//GO:0034637//GO:0008653//GO:0044419//GO:0000271//GO:0016032//GO:0065008//GO:0007165//GO:0044260//GO:0009103//GO:0033692//GO:0019538//GO:0008610//GO:0009058//GO:0009987//GO:0065007//GO:0005976//GO:0044262//GO:0071704//GO:0035821//GO:0043170//GO:0050794//GO:0005975//GO:0006464//GO:0051817//GO:0044238//GO:0043412//GO:0006468//GO:0006793//GO:…	interaction with host//biological_process//cell communication//response to stimulus//cellular lipid metabolic process//cellular carbohydrate biosynthetic process//lipopolysaccharide metabolic process//interspecies interaction between organisms//polysaccharide biosynthetic process//viral reproduction//regulation of biological quality//signal transduction//cellular macromolecule metabolic process//…	GO:0016020//GO:0019012//GO:0005575//GO:0044423//GO:0019031	membrane//virion//cellular_component//virion part//viral envelope	GO:0003824//GO:0001883//GO:0016772//GO:0005524//GO:0032553//GO:0003674//GO:0030554//GO:0017076//GO:0016301//GO:0043167//GO:0032549//GO:0005488//GO:0016773//GO:0016740//GO:0032555//GO:0035639//GO:0004672//GO:0032559//GO:0097159//GO:0001882//GO:0032550//GO:0000166//GO:0043168	catalytic activity//purine nucleoside binding//transferase activity, transferring phosphorus-containing groups//ATP binding//ribonucleotide binding//molecular_function//adenyl nucleotide binding//purine nucleotide binding//kinase activity//ion binding//ribonucleoside binding//binding//phosphotransferase activity, alcohol group as acceptor//transferase activity//purine ribonucleotide binding//puri…
Csa1G471460	uncharacterized LOC101205379	http://www.genome.jp/dbget-bin/www_bget?csv:101205379	--	--	--	--	--	--
Csa1G475990	dof zinc finger protein DOF2.3-like	http://www.genome.jp/dbget-bin/www_bget?csv:101229877	GO:0032774//GO:0019219//GO:0008150//GO:0006139//GO:0006725//GO:0051252//GO:0046483//GO:0019438//GO:0010467//GO:0006807//GO:0019222//GO:0016070//GO:0044260//GO:0009987//GO:0031323//GO:0009058//GO:0034654//GO:2000112//GO:0065007//GO:0006351//GO:0071704//GO:0051171//GO:0006355//GO:0050794//GO:0043170//GO:0031326//GO:0010556//GO:0010468//GO:2001141//GO:0018130//GO:0060255//GO:0044238//GO:0090304//GO:…	RNA biosynthetic process//regulation of nucleobase-containing compound metabolic process//biological_process//nucleobase-containing compound metabolic process//cellular aromatic compound metabolic process//regulation of RNA metabolic process//heterocycle metabolic process//aromatic compound biosynthetic process//gene expression//nitrogen compound metabolic process//regulation of metabolic process…	--	--	GO:0043169//GO:0046872//GO:0003676//GO:0003677//GO:0003674//GO:0005488//GO:0043167//GO:0046914//GO:0008270//GO:0097159	cation binding//metal ion binding//nucleic acid binding//DNA binding//molecular_function//binding//ion binding//transition metal ion binding//zinc ion binding//organic cyclic compound binding
Csa1G479100	--	--	--	--	--	--	--	--
Csa1G481740	uncharacterized LOC101205220	http://www.genome.jp/dbget-bin/www_bget?csv:101205220	--	--	--	--	--	--
Csa1G499310	phenolic glucoside malonyltransferase 2-like	http://www.genome.jp/dbget-bin/www_bget?csv:101232574	--	--	--	--	GO:0016746//GO:0016740//GO:0003674//GO:0016747//GO:0003824	transferase activity, transferring acyl groups//transferase activity//molecular_function//transferase activity, transferring acyl groups other than amino-acyl groups//catalytic activity
Csa1G515470	outer envelope pore protein 16, chloroplastic-like	http://www.genome.jp/dbget-bin/www_bget?csv:101223276	GO:0050789//GO:0051704//GO:0043900//GO:0046999//GO:0050794//GO:0065007//GO:0009987//GO:0000746//GO:0008150	regulation of biological process//multi-organism process//regulation of multi-organism process//regulation of conjugation//regulation of cellular process//biological regulation//cellular process//conjugation//biological_process	GO:0005575//GO:0019867//GO:0016020	cellular_component//outer membrane//membrane	--	--
Csa1G523060	PGR5-like protein 1A, chloroplastic-like	http://www.genome.jp/dbget-bin/www_bget?csv:101216368	--	--	GO:0044464//GO:0005737//GO:0005622//GO:0044424//GO:0005623//GO:0005575	cell part//cytoplasm//intracellular//intracellular part//cell//cellular_component	--	--
Csa1G523630	uncharacterized LOC101217136; K07025 putative hydrolase of the HAD superfamily	http://www.genome.jp/dbget-bin/www_bget?csv:101217136	GO:0044249//GO:0006497//GO:0006793//GO:0008152//GO:0006796//GO:0019637//GO:0046467//GO:0044238//GO:0043412//GO:0006464//GO:0009247//GO:0006644//GO:0034645//GO:0006661//GO:0006664//GO:0044267//GO:0042157//GO:0090407//GO:0006643//GO:0044237//GO:0006629//GO:0009059//GO:0045017//GO:0044260//GO:0006505//GO:0044255//GO:0008150//GO:0046488//GO:0006506//GO:0043170//GO:0008654//GO:0046474//GO:0071704//GO:…	cellular biosynthetic process//protein lipidation//phosphorus metabolic process//metabolic process//phosphate-containing compound metabolic process//organophosphate metabolic process//membrane lipid biosynthetic process//primary metabolic process//macromolecule modification//protein modification process//glycolipid biosynthetic process//phospholipid metabolic process//cellular macromolecule biosy…	GO:0012505//GO:0043231//GO:0044432//GO:0043226//GO:0005737//GO:0044464//GO:0044422//GO:0005622//GO:0044425//GO:0044446//GO:0031090//GO:0042175//GO:0016021//GO:0005783//GO:0005789//GO:0043229//GO:0043227//GO:0016020//GO:0044444//GO:0005575//GO:0031224//GO:0005623//GO:0044424	endomembrane system//intracellular membrane-bounded organelle//endoplasmic reticulum part//organelle//cytoplasm//cell part//organelle part//intracellular//membrane part//intracellular organelle part//organelle membrane//nuclear outer membrane-endoplasmic reticulum membrane network//integral to membrane//endoplasmic reticulum//endoplasmic reticulum membrane//intracellular organelle//membrane-bound…	GO:0016787//GO:0042578//GO:0003824//GO:0016788//GO:0003674//GO:0016791	hydrolase activity//phosphoric ester hydrolase activity//catalytic activity//hydrolase activity, acting on ester bonds//molecular_function//phosphatase activity
Csa1G524650	uncharacterized LOC101205938	http://www.genome.jp/dbget-bin/www_bget?csv:101205938	GO:0008152//GO:0008213//GO:0006464//GO:0044238//GO:0043412//GO:0044267//GO:0006479//GO:0044237//GO:0018410//GO:0043414//GO:0006481//GO:0032259//GO:0043687//GO:0044260//GO:0008150//GO:0071704//GO:0043170//GO:0019538//GO:0009987	metabolic process//protein alkylation//protein modification process//primary metabolic process//macromolecule modification//cellular protein metabolic process//protein methylation//cellular metabolic process//C-terminal protein amino acid modification//macromolecule methylation//C-terminal protein methylation//methylation//post-translational protein modification//cellular macromolecule metabolic …	GO:0044425//GO:0016021//GO:0016020//GO:0031224//GO:0005575	membrane part//integral to membrane//membrane//intrinsic to membrane//cellular_component	GO:0016740//GO:0003880//GO:0051998//GO:0008168//GO:0010340//GO:0003824//GO:0016741//GO:0003674//GO:0008757//GO:0008171//GO:0008276//GO:0004671	transferase activity//protein C-terminal carboxyl O-methyltransferase activity//protein carboxyl O-methyltransferase activity//methyltransferase activity//carboxyl-O-methyltransferase activity//catalytic activity//transferase activity, transferring one-carbon groups//molecular_function//S-adenosylmethionine-dependent methyltransferase activity//O-methyltransferase activity//protein methyltransfer…
Csa1G524660	uncharacterized LOC101205712	http://www.genome.jp/dbget-bin/www_bget?csv:101205712	--	--	--	--	GO:0097159//GO:0005488//GO:0003674//GO:0003677//GO:0003676	organic cyclic compound binding//binding//molecular_function//DNA binding//nucleic acid binding
Csa1G524670	protein TOC75-3, chloroplastic-like	http://www.genome.jp/dbget-bin/www_bget?csv:101206900	--	--	GO:0071944//GO:0044464//GO:0044459//GO:0016021//GO:0044425//GO:0005886//GO:0016020//GO:0019867//GO:0031226//GO:0005623//GO:0005887//GO:0005575//GO:0031224	cell periphery//cell part//plasma membrane part//integral to membrane//membrane part//plasma membrane//membrane//outer membrane//intrinsic to plasma membrane//cell//integral to plasma membrane//cellular_component//intrinsic to membrane	GO:0005488//GO:0008092//GO:0005515//GO:0003674	binding//cytoskeletal protein binding//protein binding//molecular_function
Csa1G524760	protein phosphatase 2C 3-like; K14497 protein phosphatase 2C [EC:3.1.3.16]	http://www.genome.jp/dbget-bin/www_bget?csv:101226308	GO:0065007//GO:0034654//GO:2000112//GO:0009987//GO:0009058//GO:0031323//GO:0050794//GO:0043170//GO:0006355//GO:0006351//GO:0071704//GO:0051171//GO:0019222//GO:0010467//GO:0046483//GO:0019438//GO:0006807//GO:0006139//GO:0008150//GO:0006725//GO:0051252//GO:0032774//GO:0019219//GO:0016070//GO:0044260//GO:0009059//GO:0009889//GO:0034641//GO:0044271//GO:0034645//GO:0050789//GO:0044237//GO:0090304//GO:…	biological regulation//nucleobase-containing compound biosynthetic process//regulation of cellular macromolecule biosynthetic process//cellular process//biosynthetic process//regulation of cellular metabolic process//regulation of cellular process//macromolecule metabolic process//regulation of transcription, DNA-dependent//transcription, DNA-dependent//organic substance metabolic process//regula…	--	--	GO:0003674//GO:0003824//GO:0003676//GO:0097159//GO:0005488	molecular_function//catalytic activity//nucleic acid binding//organic cyclic compound binding//binding
Csa1G525270	metal tolerance protein B-like; K14689 solute carrier family 30 (zinc transporter), member 2	http://www.genome.jp/dbget-bin/www_bget?csv:101219768	GO:0006259//GO:0044260//GO:0022904//GO:0051234//GO:0055114//GO:0006807//GO:0046483//GO:0006725//GO:0071702//GO:0045333//GO:0006139//GO:0008150//GO:0050896//GO:0051179//GO:0043170//GO:0051649//GO:0006950//GO:0046903//GO:0006811//GO:0071704//GO:0006091//GO:0009987//GO:0009307//GO:0033036//GO:0006810//GO:0008152//GO:0006812//GO:0045184//GO:0090304//GO:0044238//GO:0043412//GO:0032940//GO:0044355//GO:…	DNA metabolic process//cellular macromolecule metabolic process//respiratory electron transport chain//establishment of localization//oxidation-reduction process//nitrogen compound metabolic process//heterocycle metabolic process//cellular aromatic compound metabolic process//organic substance transport//cellular respiration//nucleobase-containing compound metabolic process//biological_process//r…	GO:0016020//GO:0005575//GO:0031224//GO:0044425//GO:0016021	membrane//cellular_component//intrinsic to membrane//membrane part//integral to membrane	GO:0008324//GO:0022857//GO:0003677//GO:0003676//GO:0046872//GO:0022804//GO:0015450//GO:0003824//GO:0043169//GO:0016788//GO:0022884//GO:0003674//GO:0004536//GO:0008565//GO:0004518//GO:0022892//GO:0016893//GO:0015399//GO:0000287//GO:0015666//GO:0016787//GO:0015075//GO:0008320//GO:0005215//GO:0043167//GO:0005488//GO:0022891//GO:0004519//GO:0097159//GO:0015405//GO:0004520//GO:0016888//GO:0009036	cation transmembrane transporter activity//transmembrane transporter activity//DNA binding//nucleic acid binding//metal ion binding//active transmembrane transporter activity//P-P-bond-hydrolysis-driven protein transmembrane transporter activity//catalytic activity//cation binding//hydrolase activity, acting on ester bonds//macromolecule transmembrane transporter activity//molecular_function//deo…
Csa1G525300	uncharacterized LOC101228934	http://www.genome.jp/dbget-bin/www_bget?csv:101228934	--	--	--	--	--	--
Csa1G525320	uncharacterized LOC101229161	http://www.genome.jp/dbget-bin/www_bget?csv:101229161	--	--	--	--	--	--
Csa1G528490	uncharacterized LOC101221508	http://www.genome.jp/dbget-bin/www_bget?csv:101221508	--	--	GO:0016020//GO:0031224//GO:0005575//GO:0044425//GO:0016021	membrane//intrinsic to membrane//cellular_component//membrane part//integral to membrane	GO:0003676//GO:0003674//GO:0005488//GO:0097159	nucleic acid binding//molecular_function//binding//organic cyclic compound binding
Csa1G528510	uncharacterized LOC101212839	http://www.genome.jp/dbget-bin/www_bget?csv:101212839	--	--	--	--	--	--
Csa1G528590	phosphomethylpyrimidine synthase, chloroplastic-like; K03147 phosphomethylpyrimidine synthase [EC:4.1.99.17]	http://www.genome.jp/dbget-bin/www_bget?csv:101213311	GO:0071704//GO:0009228//GO:0006766//GO:0006790//GO:0009058//GO:0009987//GO:0044283//GO:0044272//GO:0006772//GO:0042724//GO:0044281//GO:0042364//GO:0006725//GO:0008150//GO:0006807//GO:0046483//GO:0019438//GO:0042723//GO:0044237//GO:0044271//GO:0034641//GO:0072528//GO:0006767//GO:0009110//GO:0008152//GO:0072527//GO:0044249//GO:0018130	organic substance metabolic process//thiamine biosynthetic process//vitamin metabolic process//sulfur compound metabolic process//biosynthetic process//cellular process//small molecule biosynthetic process//sulfur compound biosynthetic process//thiamine metabolic process//thiamine-containing compound biosynthetic process//small molecule metabolic process//water-soluble vitamin biosynthetic proces…	--	--	--	--
Csa1G528600	cytochrome P450 86A1-like; K15401 fatty acid omega-hydroxylase [EC:1.14.-.-]	http://www.genome.jp/dbget-bin/www_bget?csv:101214516	GO:0008152//GO:0008150//GO:0055114	metabolic process//biological_process//oxidation-reduction process	--	--	GO:0046914//GO:0097159//GO:0005506//GO:0020037//GO:0016491//GO:0005488//GO:0043167//GO:0003674//GO:0016705//GO:0046872//GO:0046906//GO:0003824//GO:0043169//GO:0009055	transition metal ion binding//organic cyclic compound binding//iron ion binding//heme binding//oxidoreductase activity//binding//ion binding//molecular_function//oxidoreductase activity, acting on paired donors, with incorporation or reduction of molecular oxygen//metal ion binding//tetrapyrrole binding//catalytic activity//cation binding//electron carrier activity
Csa1G528610	probable anion transporter 2, chloroplastic-like	http://www.genome.jp/dbget-bin/www_bget?csv:101222133	GO:0006810//GO:0055085//GO:0051234//GO:0051179//GO:0008150//GO:0009987	transport//transmembrane transport//establishment of localization//localization//biological_process//cellular process	GO:0044425//GO:0016021//GO:0016020//GO:0031224//GO:0005575	membrane part//integral to membrane//membrane//intrinsic to membrane//cellular_component	--	--
Csa1G530130	pentatricopeptide repeat-containing protein At2g29760, chloroplastic-like	http://www.genome.jp/dbget-bin/www_bget?csv:101204015	--	--	--	--	GO:0005515//GO:0003674//GO:0005488	protein binding//molecular_function//binding
Csa1G530140	uncharacterized LOC101210033	http://www.genome.jp/dbget-bin/www_bget?csv:101210033	--	--	GO:0000151//GO:0031461//GO:0005634//GO:0044422//GO:0044446//GO:0005622//GO:0043226//GO:0000152//GO:0043231//GO:0043234//GO:0044464//GO:0044428//GO:0044424//GO:0005623//GO:0005575//GO:0043227//GO:0043229//GO:0032991//GO:0005680	ubiquitin ligase complex//cullin-RING ubiquitin ligase complex//nucleus//organelle part//intracellular organelle part//intracellular//organelle//nuclear ubiquitin ligase complex//intracellular membrane-bounded organelle//protein complex//cell part//nuclear part//intracellular part//cell//cellular_component//membrane-bounded organelle//intracellular organelle//macromolecular complex//anaphase-prom…	GO:0046914//GO:0016881//GO:0008270//GO:0097159//GO:0005488//GO:0043167//GO:0004842//GO:0016879//GO:0003674//GO:0046872//GO:0043169//GO:0003824//GO:0019787//GO:0003676//GO:0003723//GO:0016874	transition metal ion binding//acid-amino acid ligase activity//zinc ion binding//organic cyclic compound binding//binding//ion binding//ubiquitin-protein ligase activity//ligase activity, forming carbon-nitrogen bonds//molecular_function//metal ion binding//cation binding//catalytic activity//small conjugating protein ligase activity//nucleic acid binding//RNA binding//ligase activity
Csa1G532290	uncharacterized LOC101217703	http://www.genome.jp/dbget-bin/www_bget?csv:101217703	--	--	--	--	--	--
Csa1G533490	uncharacterized LOC101204748	http://www.genome.jp/dbget-bin/www_bget?csv:101204748	--	--	--	--	GO:0003674//GO:0003824//GO:0016787	molecular_function//catalytic activity//hydrolase activity
Csa1G533540	protein CHLOROPLAST IMPORT APPARATUS 2-like	http://www.genome.jp/dbget-bin/www_bget?csv:101214525	--	--	--	--	GO:0005488//GO:0003674//GO:0005515	binding//molecular_function//protein binding
Csa1G533570	cinnamoyl-CoA reductase 1-like	http://www.genome.jp/dbget-bin/www_bget?csv:101204420	GO:0008152//GO:0044238//GO:0044237//GO:0006629//GO:0055114//GO:0008150//GO:0008202//GO:0006694//GO:0071704//GO:0008610//GO:0009987//GO:0009058	metabolic process//primary metabolic process//cellular metabolic process//lipid metabolic process//oxidation-reduction process//biological_process//steroid metabolic process//steroid biosynthetic process//organic substance metabolic process//lipid biosynthetic process//cellular process//biosynthetic process	--	--	GO:0016491//GO:0005488//GO:0003854//GO:0033764//GO:0016614//GO:0003824//GO:0016229//GO:0003674//GO:0048037//GO:0016616//GO:0050662	oxidoreductase activity//binding//3-beta-hydroxy-delta5-steroid dehydrogenase activity//steroid dehydrogenase activity, acting on the CH-OH group of donors, NAD or NADP as acceptor//oxidoreductase activity, acting on CH-OH group of donors//catalytic activity//steroid dehydrogenase activity//molecular_function//cofactor binding//oxidoreductase activity, acting on the CH-OH group of donors, NAD or …
Csa1G540370	reticuline oxidase-like protein-like	http://www.genome.jp/dbget-bin/www_bget?csv:101218120	GO:0046483//GO:0006807//GO:0008150//GO:0006725//GO:0065008//GO:0055114//GO:0042445//GO:0065007//GO:0009987//GO:0034754//GO:0010817//GO:0071704//GO:0009308//GO:0008152//GO:0009690//GO:0044237	heterocycle metabolic process//nitrogen compound metabolic process//biological_process//cellular aromatic compound metabolic process//regulation of biological quality//oxidation-reduction process//hormone metabolic process//biological regulation//cellular process//cellular hormone metabolic process//regulation of hormone levels//organic substance metabolic process//amine metabolic process//metabo…	--	--	GO:0003824//GO:0016645//GO:0019139//GO:0050662//GO:0050660//GO:0003674//GO:0048037//GO:0016491//GO:0005488//GO:0043167//GO:0043168//GO:0000166//GO:0097159	catalytic activity//oxidoreductase activity, acting on the CH-NH group of donors//cytokinin dehydrogenase activity//coenzyme binding//flavin adenine dinucleotide binding//molecular_function//cofactor binding//oxidoreductase activity//binding//ion binding//anion binding//nucleotide binding//organic cyclic compound binding
Csa1G553520	uncharacterized LOC101221199	http://www.genome.jp/dbget-bin/www_bget?csv:101221199	--	--	--	--	--	--
Csa1G555600	transcription factor bHLH149-like	http://www.genome.jp/dbget-bin/www_bget?csv:101222379	GO:0019538//GO:0009058//GO:0006412//GO:0009987//GO:0043170//GO:0071704//GO:0010467//GO:0008150//GO:0044260//GO:0009059//GO:0034645//GO:0044267//GO:0044237//GO:0044238//GO:0044249//GO:0008152	protein metabolic process//biosynthetic process//translation//cellular process//macromolecule metabolic process//organic substance metabolic process//gene expression//biological_process//cellular macromolecule metabolic process//macromolecule biosynthetic process//cellular macromolecule biosynthetic process//cellular protein metabolic process//cellular metabolic process//primary metabolic process…	GO:0005623//GO:0044424//GO:0005575//GO:0043229//GO:0032991//GO:0044444//GO:0043228//GO:0043232//GO:0005622//GO:0043226//GO:0005737//GO:0044464//GO:0005840//GO:0030529	cell//intracellular part//cellular_component//intracellular organelle//macromolecular complex//cytoplasmic part//non-membrane-bounded organelle//intracellular non-membrane-bounded organelle//intracellular//organelle//cytoplasm//cell part//ribosome//ribonucleoprotein complex	GO:0003674//GO:0005198//GO:0003735	molecular_function//structural molecule activity//structural constituent of ribosome
Csa1G560790	uncharacterized LOC101217560	http://www.genome.jp/dbget-bin/www_bget?csv:101217560	GO:0009312//GO:0006464//GO:0043412//GO:0044238//GO:0008152//GO:0006793//GO:0006468//GO:0006796//GO:0009311//GO:0044264//GO:0044249//GO:0016310//GO:0016051//GO:0046401//GO:0006629//GO:0009059//GO:0044267//GO:0009244//GO:0044237//GO:0034645//GO:0008150//GO:0044255//GO:0008653//GO:0034637//GO:0000271//GO:0044260//GO:0009103//GO:0033692//GO:0008610//GO:0019538//GO:0009987//GO:0009058//GO:0005976//GO:…	oligosaccharide biosynthetic process//protein modification process//macromolecule modification//primary metabolic process//metabolic process//phosphorus metabolic process//protein phosphorylation//phosphate-containing compound metabolic process//oligosaccharide metabolic process//cellular polysaccharide metabolic process//cellular biosynthetic process//phosphorylation//carbohydrate biosynthetic p…	--	--	GO:0032549//GO:0005488//GO:0043167//GO:0016773//GO:0016740//GO:0035639//GO:0032555//GO:0004672//GO:0032559//GO:0032550//GO:0001882//GO:0097159//GO:0000166//GO:0043168//GO:0003824//GO:0001883//GO:0016772//GO:0005524//GO:0030554//GO:0003674//GO:0032553//GO:0016301//GO:0017076	ribonucleoside binding//binding//ion binding//phosphotransferase activity, alcohol group as acceptor//transferase activity//purine ribonucleoside triphosphate binding//purine ribonucleotide binding//protein kinase activity//adenyl ribonucleotide binding//purine ribonucleoside binding//nucleoside binding//organic cyclic compound binding//nucleotide binding//anion binding//catalytic activity//purin…
Csa1G560830	DEAD-box ATP-dependent RNA helicase 3, chloroplastic-like	http://www.genome.jp/dbget-bin/www_bget?csv:101218035	GO:0044249//GO:0008152//GO:0008299//GO:0044238//GO:0016114//GO:0006720//GO:0044237//GO:0006629//GO:0006721//GO:0044255//GO:0008150//GO:0071704//GO:0008610//GO:0009987//GO:0009058	cellular biosynthetic process//metabolic process//isoprenoid biosynthetic process//primary metabolic process//terpenoid biosynthetic process//isoprenoid metabolic process//cellular metabolic process//lipid metabolic process//terpenoid metabolic process//cellular lipid metabolic process//biological_process//organic substance metabolic process//lipid biosynthetic process//cellular process//biosynth…	GO:0043231//GO:0043226//GO:0044464//GO:0005622//GO:0005634//GO:0043229//GO:0043227//GO:0005575//GO:0005623//GO:0044424	intracellular membrane-bounded organelle//organelle//cell part//intracellular//nucleus//intracellular organelle//membrane-bounded organelle//cellular_component//cell//intracellular part	GO:0035639//GO:0032555//GO:0016787//GO:0016818//GO:0032549//GO:0005488//GO:0043167//GO:0016462//GO:0008026//GO:0043168//GO:0070035//GO:0016887//GO:0032550//GO:0001882//GO:0097159//GO:0008685//GO:0000166//GO:0008270//GO:0032559//GO:0046914//GO:0017111//GO:0016829//GO:0004386//GO:0003723//GO:0003676//GO:0016849//GO:0016817//GO:0003677//GO:0046872//GO:0003824//GO:0001883//GO:0043169//GO:0017076//GO:…	purine ribonucleoside triphosphate binding//purine ribonucleotide binding//hydrolase activity//hydrolase activity, acting on acid anhydrides, in phosphorus-containing anhydrides//ribonucleoside binding//binding//ion binding//pyrophosphatase activity//ATP-dependent helicase activity//anion binding//purine NTP-dependent helicase activity//ATPase activity//purine ribonucleoside binding//nucleoside b…
Csa1G561370	uncharacterized LOC101203786; K09422 myb proto-oncogene protein, plant	http://www.genome.jp/dbget-bin/www_bget?csv:101203786	--	--	--	--	GO:0003674//GO:0003676//GO:0003677//GO:0097159//GO:0005488	molecular_function//nucleic acid binding//DNA binding//organic cyclic compound binding//binding
Csa1G569120	uncharacterized LOC101206669	http://www.genome.jp/dbget-bin/www_bget?csv:101206669	--	--	--	--	--	--
Csa1G569190	uncharacterized LOC101207151	http://www.genome.jp/dbget-bin/www_bget?csv:101207151	--	--	--	--	GO:0003674//GO:0046872//GO:0043169//GO:0046914//GO:0008270//GO:0043167//GO:0005488	molecular_function//metal ion binding//cation binding//transition metal ion binding//zinc ion binding//ion binding//binding
Csa1G569280	bidirectional sugar transporter SWEET16-like; K15382 solute carrier family 50 (sugar transporter)	http://www.genome.jp/dbget-bin/www_bget?csv:101203449	--	--	GO:0031224//GO:0005575//GO:0016020//GO:0044425//GO:0016021	intrinsic to membrane//cellular_component//membrane//membrane part//integral to membrane	--	--
Csa1G569330	pre-mRNA-splicing factor SF2-like; K12890 splicing factor, arginine/serine-rich 1/9	http://www.genome.jp/dbget-bin/www_bget?csv:101223011	--	--	--	--	GO:0003676//GO:0003674//GO:0005488//GO:0097159	nucleic acid binding//molecular_function//binding//organic cyclic compound binding
Csa1G569340	probable purine permease 10-like	http://www.genome.jp/dbget-bin/www_bget?csv:101229359	GO:0008643//GO:0006810//GO:0008150//GO:0071702//GO:0051179//GO:0051234	carbohydrate transport//transport//biological_process//organic substance transport//localization//establishment of localization	GO:0043231//GO:0005737//GO:0043226//GO:0044464//GO:0012505//GO:0016021//GO:0031090//GO:0044431//GO:0044422//GO:0044425//GO:0005622//GO:0044446//GO:0043229//GO:0043227//GO:0016020//GO:0044444//GO:0000139//GO:0005623//GO:0044424//GO:0005575//GO:0031224//GO:0005794	intracellular membrane-bounded organelle//cytoplasm//organelle//cell part//endomembrane system//integral to membrane//organelle membrane//Golgi apparatus part//organelle part//membrane part//intracellular//intracellular organelle part//intracellular organelle//membrane-bounded organelle//membrane//cytoplasmic part//Golgi membrane//cell//intracellular part//cellular_component//intrinsic to membran…	GO:0015075//GO:0005215//GO:0022891//GO:0005402//GO:0015295//GO:0015291//GO:0051119//GO:0015294//GO:0022804//GO:0008324//GO:0022857//GO:0015144//GO:0022892//GO:0015293//GO:0005351//GO:0003674	ion transmembrane transporter activity//transporter activity//substrate-specific transmembrane transporter activity//cation:sugar symporter activity//solute:hydrogen symporter activity//secondary active transmembrane transporter activity//sugar transmembrane transporter activity//solute:cation symporter activity//active transmembrane transporter activity//cation transmembrane transporter activity…
Csa1G569440	uncharacterized LOC101206264	http://www.genome.jp/dbget-bin/www_bget?csv:101206264	GO:0006811//GO:0051234//GO:0008150//GO:0051179//GO:0030001//GO:0006810//GO:0006812	ion transport//establishment of localization//biological_process//localization//metal ion transport//transport//cation transport	--	--	GO:0003674//GO:0043169//GO:0046872//GO:0043167//GO:0005488	molecular_function//cation binding//metal ion binding//ion binding//binding
Csa1G569450	respiratory burst oxidase homolog protein B-like; K13447 respiratory burst oxidase [EC:1.6.3.- 1.11.1.-]	http://www.genome.jp/dbget-bin/www_bget?csv:101206498	GO:0008152//GO:0055114//GO:0008150	metabolic process//oxidation-reduction process//biological_process	--	--	GO:0016684//GO:0016209//GO:0016651//GO:0050664//GO:0016491//GO:0003674//GO:0004601//GO:0003824	oxidoreductase activity, acting on peroxide as acceptor//antioxidant activity//oxidoreductase activity, acting on NADH or NADPH//oxidoreductase activity, acting on NADH or NADPH, oxygen as acceptor//oxidoreductase activity//molecular_function//peroxidase activity//catalytic activity
Csa1G570140	root phototropism protein 3-like	http://www.genome.jp/dbget-bin/www_bget?csv:101209592	GO:0009314//GO:0009416//GO:0009628//GO:0050896//GO:0008150	response to radiation//response to light stimulus//response to abiotic stimulus//response to stimulus//biological_process	GO:0016020//GO:0005575	membrane//cellular_component	GO:0005488//GO:0004871//GO:0003674//GO:0005515//GO:0060089	binding//signal transducer activity//molecular_function//protein binding//molecular transducer activity
Csa1G570180	uncharacterized LOC101209838	http://www.genome.jp/dbget-bin/www_bget?csv:101209838	GO:0043412//GO:0046467//GO:0044238//GO:0019637//GO:0009247//GO:0006464//GO:0006497//GO:0044249//GO:0006796//GO:0006812//GO:0006810//GO:0008152//GO:0006793//GO:0009059//GO:0006629//GO:0006664//GO:0006661//GO:0034645//GO:0006644//GO:0044237//GO:0006643//GO:0090407//GO:0042157//GO:0044267//GO:0030001//GO:0044255//GO:0051179//GO:0046488//GO:0008150//GO:0044260//GO:0045017//GO:0006505//GO:0051234//GO:…	macromolecule modification//membrane lipid biosynthetic process//primary metabolic process//organophosphate metabolic process//glycolipid biosynthetic process//protein modification process//protein lipidation//cellular biosynthetic process//phosphate-containing compound metabolic process//cation transport//transport//metabolic process//phosphorus metabolic process//macromolecule biosynthetic proc…	GO:0005737//GO:0043226//GO:0044432//GO:0043231//GO:0044464//GO:0012505//GO:0042175//GO:0031090//GO:0044422//GO:0044446//GO:0044425//GO:0005622//GO:0043227//GO:0043229//GO:0005789//GO:0044444//GO:0016020//GO:0005783//GO:0044424//GO:0005623//GO:0005575	cytoplasm//organelle//endoplasmic reticulum part//intracellular membrane-bounded organelle//cell part//endomembrane system//nuclear outer membrane-endoplasmic reticulum membrane network//organelle membrane//organelle part//intracellular organelle part//membrane part//intracellular//membrane-bounded organelle//intracellular organelle//endoplasmic reticulum membrane//cytoplasmic part//membrane//end…	GO:0005488//GO:0043167//GO:0016740//GO:0046872//GO:0043169//GO:0003824//GO:0003674	binding//ion binding//transferase activity//metal ion binding//cation binding//catalytic activity//molecular_function
Csa1G574800	cysteine synthase-like; K01738 cysteine synthase A [EC:2.5.1.47]	http://www.genome.jp/dbget-bin/www_bget?csv:101219222	GO:0008150//GO:0008152	biological_process//metabolic process	--	--	GO:0003824//GO:0003674//GO:0048037//GO:0030170//GO:0005488//GO:0043167//GO:0043168	catalytic activity//molecular_function//cofactor binding//pyridoxal phosphate binding//binding//ion binding//anion binding
Csa1G574850	uncharacterized LOC101229363	http://www.genome.jp/dbget-bin/www_bget?csv:101229363	--	--	--	--	--	--
Csa1G574870	NADP-dependent malic enzyme-like; K00029 malate dehydrogenase (oxaloacetate-decarboxylating)(NADP+) [EC:1.1.1.40]	http://www.genome.jp/dbget-bin/www_bget?csv:101219936	GO:0055114//GO:0008150//GO:0008152	oxidation-reduction process//biological_process//metabolic process	--	--	GO:0016614//GO:0003824//GO:0048037//GO:0003674//GO:0051287//GO:0016616//GO:0050662//GO:0016491//GO:0005488//GO:0097159//GO:0000166	oxidoreductase activity, acting on CH-OH group of donors//catalytic activity//cofactor binding//molecular_function//NAD binding//oxidoreductase activity, acting on the CH-OH group of donors, NAD or NADP as acceptor//coenzyme binding//oxidoreductase activity//binding//organic cyclic compound binding//nucleotide binding
Csa1G574910	uncharacterized LOC101226196	http://www.genome.jp/dbget-bin/www_bget?csv:101226196	--	--	--	--	--	--
Csa1G574970	hexokinase-2-like; K00844 hexokinase [EC:2.7.1.1]	http://www.genome.jp/dbget-bin/www_bget?csv:101227105	GO:0031323//GO:0009058//GO:0009987//GO:2000112//GO:0034654//GO:0043903//GO:0065007//GO:0071704//GO:0051171//GO:0006351//GO:0005975//GO:0006355//GO:0043170//GO:0050794//GO:0019219//GO:0032774//GO:0050792//GO:0048522//GO:0051252//GO:0006725//GO:0010557//GO:0008150//GO:0006139//GO:0006807//GO:0019438//GO:0046483//GO:0010467//GO:0019222//GO:0044419//GO:0016032//GO:0045935//GO:0044260//GO:0016070//GO:…	regulation of cellular metabolic process//biosynthetic process//cellular process//regulation of cellular macromolecule biosynthetic process//nucleobase-containing compound biosynthetic process//regulation of symbiosis, encompassing mutualism through parasitism//biological regulation//organic substance metabolic process//regulation of nitrogen compound metabolic process//transcription, DNA-depende…	GO:0044424//GO:0005623//GO:0005575//GO:0043227//GO:0043229//GO:0005634//GO:0005622//GO:0044464//GO:0043226//GO:0043231	intracellular part//cell//cellular_component//membrane-bounded organelle//intracellular organelle//nucleus//intracellular//cell part//organelle//intracellular membrane-bounded organelle	GO:0005524//GO:0004518//GO:0030554//GO:0003674//GO:0032553//GO:0017076//GO:0016788//GO:0001883//GO:0003824//GO:0016772//GO:0032559//GO:0000166//GO:0001882//GO:0097159//GO:0032550//GO:0043168//GO:0043167//GO:0005488//GO:0032549//GO:0016787//GO:0016773//GO:0016740//GO:0035639//GO:0032555	ATP binding//nuclease activity//adenyl nucleotide binding//molecular_function//ribonucleotide binding//purine nucleotide binding//hydrolase activity, acting on ester bonds//purine nucleoside binding//catalytic activity//transferase activity, transferring phosphorus-containing groups//adenyl ribonucleotide binding//nucleotide binding//nucleoside binding//organic cyclic compound binding//purine rib…
Csa1G574980	multidrug and toxin extrusion protein 2-like; K03327 multidrug resistance protein, MATE family	http://www.genome.jp/dbget-bin/www_bget?csv:101215418	GO:0055085//GO:0042493//GO:0071840//GO:0015893//GO:0006996//GO:0006810//GO:0006855//GO:0007010//GO:0042221//GO:0016043//GO:0009987//GO:0051234//GO:0008150//GO:0051179//GO:0050896	transmembrane transport//response to drug//cellular component organization or biogenesis//drug transport//organelle organization//transport//drug transmembrane transport//cytoskeleton organization//response to chemical stimulus//cellular component organization//cellular process//establishment of localization//biological_process//localization//response to stimulus	GO:0005575//GO:0016020	cellular_component//membrane	GO:0015238//GO:0008092//GO:0015291//GO:0003779//GO:0005215//GO:0005488//GO:0003674//GO:0005515//GO:0022857//GO:0022804//GO:0015297	drug transmembrane transporter activity//cytoskeletal protein binding//secondary active transmembrane transporter activity//actin binding//transporter activity//binding//molecular_function//protein binding//transmembrane transporter activity//active transmembrane transporter activity//antiporter activity
Csa1G575040	--	--	--	--	--	--	--	--
Csa1G575070	glucan endo-1,3-beta-glucosidase 13-like	http://www.genome.jp/dbget-bin/www_bget?csv:101227109	GO:0044238//GO:0008152//GO:0071704//GO:0005975//GO:0008150	primary metabolic process//metabolic process//organic substance metabolic process//carbohydrate metabolic process//biological_process	--	--	GO:0016798//GO:0016787//GO:0003674//GO:0003824//GO:0004553	hydrolase activity, acting on glycosyl bonds//hydrolase activity//molecular_function//catalytic activity//hydrolase activity, hydrolyzing O-glycosyl compounds
Csa1G587970	putative GATA transcription factor 22-like	http://www.genome.jp/dbget-bin/www_bget?csv:101218275	GO:0009059//GO:0009889//GO:0034641//GO:0044271//GO:0034645//GO:0044267//GO:0050789//GO:0044237//GO:0044238//GO:0090304//GO:0060255//GO:0018130//GO:2001141//GO:0010468//GO:0031326//GO:0010556//GO:0044249//GO:0080090//GO:0008152//GO:0065007//GO:0034654//GO:2000112//GO:0019538//GO:0009058//GO:0031323//GO:0009987//GO:0006412//GO:0043170//GO:0050794//GO:0006355//GO:0051171//GO:0071704//GO:0006351//GO:…	macromolecule biosynthetic process//regulation of biosynthetic process//cellular nitrogen compound metabolic process//cellular nitrogen compound biosynthetic process//cellular macromolecule biosynthetic process//cellular protein metabolic process//regulation of biological process//cellular metabolic process//primary metabolic process//nucleic acid metabolic process//regulation of macromolecule me…	GO:0005622//GO:0043232//GO:0043226//GO:0005737//GO:0044464//GO:0005840//GO:0030529//GO:0005623//GO:0044424//GO:0005575//GO:0043229//GO:0032991//GO:0044444//GO:0043228	intracellular//intracellular non-membrane-bounded organelle//organelle//cytoplasm//cell part//ribosome//ribonucleoprotein complex//cell//intracellular part//cellular_component//intracellular organelle//macromolecular complex//cytoplasmic part//non-membrane-bounded organelle	GO:0046914//GO:0005198//GO:0001071//GO:0043565//GO:0097159//GO:0008270//GO:0003735//GO:0043167//GO:0003700//GO:0005488//GO:0003674//GO:0046872//GO:0043169//GO:0003677//GO:0003676	transition metal ion binding//structural molecule activity//nucleic acid binding transcription factor activity//sequence-specific DNA binding//organic cyclic compound binding//zinc ion binding//structural constituent of ribosome//ion binding//sequence-specific DNA binding transcription factor activity//binding//molecular_function//metal ion binding//cation binding//DNA binding//nucleic acid bindi…
Csa1G590250	--	--	--	--	--	--	--	--
Csa1G590290	uncharacterized LOC101205272	http://www.genome.jp/dbget-bin/www_bget?csv:101205272	GO:0008150//GO:0009405//GO:0051704	biological_process//pathogenesis//multi-organism process	--	--	GO:0003674//GO:0005198	molecular_function//structural molecule activity
Csa1G596520	thiol protease aleurain-like; K01366 cathepsin H [EC:3.4.22.16]	http://www.genome.jp/dbget-bin/www_bget?csv:101230721	GO:0044238//GO:0008152//GO:0008150//GO:0006508//GO:0019538//GO:0043170//GO:0071704	primary metabolic process//metabolic process//biological_process//proteolysis//protein metabolic process//macromolecule metabolic process//organic substance metabolic process	--	--	GO:0016787//GO:0004175//GO:0004197//GO:0070011//GO:0003824//GO:0008233//GO:0008234//GO:0003674	hydrolase activity//endopeptidase activity//cysteine-type endopeptidase activity//peptidase activity, acting on L-amino acid peptides//catalytic activity//peptidase activity//cysteine-type peptidase activity//molecular_function
Csa1G597060	protein LURP-one-related 6-like	http://www.genome.jp/dbget-bin/www_bget?csv:101230665	--	--	--	--	--	--
Csa1G597780	probable pectinesterase 50-like; K01051 pectinesterase [EC:3.1.1.11]	http://www.genome.jp/dbget-bin/www_bget?csv:101214012	GO:0071840//GO:0042545//GO:0071554//GO:0045229//GO:0009987//GO:0016043//GO:0071555//GO:0008150	cellular component organization or biogenesis//cell wall modification//cell wall organization or biogenesis//external encapsulating structure organization//cellular process//cellular component organization//cell wall organization//biological_process	GO:0030312//GO:0044464//GO:0071944//GO:0005623//GO:0005575//GO:0005618	external encapsulating structure//cell part//cell periphery//cell//cellular_component//cell wall	GO:0016787//GO:0030599//GO:0052689//GO:0003674//GO:0003824//GO:0016788	hydrolase activity//pectinesterase activity//carboxylic ester hydrolase activity//molecular_function//catalytic activity//hydrolase activity, acting on ester bonds
Csa1G597800	sucrose synthase-like; K00695 sucrose synthase [EC:2.4.1.13]	http://www.genome.jp/dbget-bin/www_bget?csv:101213767	GO:0016070//GO:0044260//GO:0010467//GO:0046483//GO:0019438//GO:0006807//GO:0006139//GO:0008150//GO:0006725//GO:0032774//GO:0043170//GO:0005975//GO:0044262//GO:0006351//GO:0071704//GO:0034654//GO:0009987//GO:0009058//GO:0044249//GO:0008152//GO:0005985//GO:0009311//GO:0005984//GO:0090304//GO:0044238//GO:0018130//GO:0044271//GO:0034645//GO:0044237//GO:0009059//GO:0034641	RNA metabolic process//cellular macromolecule metabolic process//gene expression//heterocycle metabolic process//aromatic compound biosynthetic process//nitrogen compound metabolic process//nucleobase-containing compound metabolic process//biological_process//cellular aromatic compound metabolic process//RNA biosynthetic process//macromolecule metabolic process//carbohydrate metabolic process//ce…	--	--	GO:0016772//GO:0003676//GO:0003677//GO:0003824//GO:0003674//GO:0016740//GO:0005488//GO:0034062//GO:0097159//GO:0003899//GO:0016779	transferase activity, transferring phosphorus-containing groups//nucleic acid binding//DNA binding//catalytic activity//molecular_function//transferase activity//binding//RNA polymerase activity//organic cyclic compound binding//DNA-directed RNA polymerase activity//nucleotidyltransferase activity
Csa1G604040	ASO, Ascorbase; L-ascorbate oxidase-like; K00423 L-ascorbate oxidase [EC:1.10.3.3]	http://www.genome.jp/dbget-bin/www_bget?csv:101215231	GO:0008150//GO:0055114//GO:0019318//GO:0071704//GO:0005975//GO:0044238//GO:0008152//GO:0006012//GO:0005996	biological_process//oxidation-reduction process//hexose metabolic process//organic substance metabolic process//carbohydrate metabolic process//primary metabolic process//metabolic process//galactose metabolic process//monosaccharide metabolic process	--	--	GO:0003824//GO:0043169//GO:0046872//GO:0016772//GO:0003674//GO:0005507//GO:0005488//GO:0043167//GO:0016491//GO:0008108//GO:0016740//GO:0070569//GO:0016779//GO:0046914	catalytic activity//cation binding//metal ion binding//transferase activity, transferring phosphorus-containing groups//molecular_function//copper ion binding//binding//ion binding//oxidoreductase activity//UDP-glucose:hexose-1-phosphate uridylyltransferase activity//transferase activity//uridylyltransferase activity//nucleotidyltransferase activity//transition metal ion binding
Csa1G604060	uncharacterized LOC101227576	http://www.genome.jp/dbget-bin/www_bget?csv:101227576	--	--	--	--	--	--
Csa1G605730	G-type lectin S-receptor-like serine/threonine-protein kinase RLK1-like	http://www.genome.jp/dbget-bin/www_bget?csv:101231790	GO:0032501//GO:0008037//GO:0022414//GO:0044260//GO:0007154//GO:0008150//GO:0048544//GO:0071704//GO:0000003//GO:0009856//GO:0043170//GO:0009987//GO:0019538//GO:0006796//GO:0006793//GO:0008152//GO:0006468//GO:0006464//GO:0048610//GO:0043412//GO:0044238//GO:0044237//GO:0044267//GO:0009875//GO:0016310//GO:0051704	multicellular organismal process//cell recognition//reproductive process//cellular macromolecule metabolic process//cell communication//biological_process//recognition of pollen//organic substance metabolic process//reproduction//pollination//macromolecule metabolic process//cellular process//protein metabolic process//phosphate-containing compound metabolic process//phosphorus metabolic process/…	--	--	GO:0016772//GO:0001883//GO:0003824//GO:0032553//GO:0003674//GO:0030554//GO:0016301//GO:0017076//GO:0005524//GO:0016740//GO:0032555//GO:0035639//GO:0032549//GO:0005488//GO:0043167//GO:0016773//GO:0000166//GO:0032550//GO:0001882//GO:0097159//GO:0043168//GO:0004672//GO:0032559	transferase activity, transferring phosphorus-containing groups//purine nucleoside binding//catalytic activity//ribonucleotide binding//molecular_function//adenyl nucleotide binding//kinase activity//purine nucleotide binding//ATP binding//transferase activity//purine ribonucleotide binding//purine ribonucleoside triphosphate binding//ribonucleoside binding//binding//ion binding//phosphotransfera…
Csa1G605740	G-type lectin S-receptor-like serine/threonine-protein kinase RLK1-like	http://www.genome.jp/dbget-bin/www_bget?csv:101232010	GO:0044238//GO:0043412//GO:0006464//GO:0006468//GO:0008152//GO:0006793//GO:0006796//GO:0016310//GO:0044267//GO:0044237//GO:0008150//GO:0044260//GO:0019538//GO:0009987//GO:0043170//GO:0071704	primary metabolic process//macromolecule modification//protein modification process//protein phosphorylation//metabolic process//phosphorus metabolic process//phosphate-containing compound metabolic process//phosphorylation//cellular protein metabolic process//cellular metabolic process//biological_process//cellular macromolecule metabolic process//protein metabolic process//cellular process//mac…	--	--	GO:0016773//GO:0043167//GO:0032549//GO:0005488//GO:0032555//GO:0035639//GO:0016740//GO:0032559//GO:0004672//GO:0043168//GO:0097159//GO:0001882//GO:0032550//GO:0000166//GO:0003824//GO:0001883//GO:0016772//GO:0005515//GO:0005524//GO:0017076//GO:0016301//GO:0030554//GO:0003674//GO:0032553	phosphotransferase activity, alcohol group as acceptor//ion binding//ribonucleoside binding//binding//purine ribonucleotide binding//purine ribonucleoside triphosphate binding//transferase activity//adenyl ribonucleotide binding//protein kinase activity//anion binding//organic cyclic compound binding//nucleoside binding//purine ribonucleoside binding//nucleotide binding//catalytic activity//purin…
Csa1G611270	beta-glucosidase 12-like; K01188 beta-glucosidase [EC:3.2.1.21]	http://www.genome.jp/dbget-bin/www_bget?csv:101208027	GO:0044238//GO:0008152//GO:0015979//GO:0044237//GO:0008150//GO:0009987//GO:0005975//GO:0071704	primary metabolic process//metabolic process//photosynthesis//cellular metabolic process//biological_process//cellular process//carbohydrate metabolic process//organic substance metabolic process	GO:0044423//GO:0043231//GO:0005737//GO:0043226//GO:0044464//GO:0043234//GO:0009521//GO:0019031//GO:0009522//GO:0005739//GO:0044436//GO:0044425//GO:0005622//GO:0043229//GO:0043227//GO:0016020//GO:0032991//GO:0044444//GO:0034357//GO:0005623//GO:0044424//GO:0005575//GO:0009579//GO:0019012	virion part//intracellular membrane-bounded organelle//cytoplasm//organelle//cell part//protein complex//photosystem//viral envelope//photosystem I//mitochondrion//thylakoid part//membrane part//intracellular//intracellular organelle//membrane-bounded organelle//membrane//macromolecular complex//cytoplasmic part//photosynthetic membrane//cell//intracellular part//cellular_component//thylakoid//vi…	GO:0016491//GO:0016787//GO:0016651//GO:0016798//GO:0003954//GO:0008137//GO:0016655//GO:0003824//GO:0004553//GO:0050136//GO:0003674	oxidoreductase activity//hydrolase activity//oxidoreductase activity, acting on NADH or NADPH//hydrolase activity, acting on glycosyl bonds//NADH dehydrogenase activity//NADH dehydrogenase (ubiquinone) activity//oxidoreductase activity, acting on NADH or NADPH, quinone or similar compound as acceptor//catalytic activity//hydrolase activity, hydrolyzing O-glycosyl compounds//NADH dehydrogenase (qu…
Csa1G611290	beta-glucosidase 24-like; K01188 beta-glucosidase [EC:3.2.1.21]	http://www.genome.jp/dbget-bin/www_bget?csv:101214518	GO:0008150//GO:0071704//GO:0005975//GO:0008152//GO:0044238	biological_process//organic substance metabolic process//carbohydrate metabolic process//metabolic process//primary metabolic process	GO:0016020//GO:0005575	membrane//cellular_component	GO:0003677//GO:0003676//GO:0004553//GO:0003824//GO:0003674//GO:0005515//GO:0046983//GO:0030234//GO:0005488//GO:0016787//GO:0097159//GO:0016798	DNA binding//nucleic acid binding//hydrolase activity, hydrolyzing O-glycosyl compounds//catalytic activity//molecular_function//protein binding//protein dimerization activity//enzyme regulator activity//binding//hydrolase activity//organic cyclic compound binding//hydrolase activity, acting on glycosyl bonds
Csa1G612890	pentatricopeptide repeat-containing protein At5g66520-like	http://www.genome.jp/dbget-bin/www_bget?csv:101212547	--	--	--	--	GO:0042802//GO:0003674//GO:0005515//GO:0005488	identical protein binding//molecular_function//protein binding//binding
Csa1G612920	lysine-specific demethylase 8-like; K10277 lysine-specific demethylase 8 [EC:1.14.11.27]	http://www.genome.jp/dbget-bin/www_bget?csv:101210592	--	--	--	--	GO:0042802//GO:0005515//GO:0003674//GO:0005488	identical protein binding//protein binding//molecular_function//binding
Csa1G612950	transcription factor bHLH122-like	http://www.genome.jp/dbget-bin/www_bget?csv:101213023	--	--	--	--	--	--
Csa1G613540	xanthine dehydrogenase 1-like; K00106 xanthine dehydrogenase/oxidase [EC:1.17.1.4 1.17.3.2]	http://www.genome.jp/dbget-bin/www_bget?csv:101211977	GO:0009059//GO:0006629//GO:0016051//GO:0034645//GO:0044237//GO:0044238//GO:0044249//GO:0044264//GO:0008152//GO:0009987//GO:0009058//GO:0008610//GO:0005975//GO:0043170//GO:0071704//GO:0005976//GO:0044262//GO:0008653//GO:0034637//GO:0044255//GO:0008150//GO:0009103//GO:0033692//GO:0044260//GO:0000271//GO:0055114	macromolecule biosynthetic process//lipid metabolic process//carbohydrate biosynthetic process//cellular macromolecule biosynthetic process//cellular metabolic process//primary metabolic process//cellular biosynthetic process//cellular polysaccharide metabolic process//metabolic process//cellular process//biosynthetic process//lipid biosynthetic process//carbohydrate metabolic process//macromolec…	GO:0016021//GO:0044425//GO:0031224//GO:0005575//GO:0016020	integral to membrane//membrane part//intrinsic to membrane//cellular_component//membrane	GO:0016491//GO:0005488//GO:0051540//GO:0043167//GO:0051536//GO:0003674//GO:0046872//GO:0043169//GO:0003824//GO:0009055	oxidoreductase activity//binding//metal cluster binding//ion binding//iron-sulfur cluster binding//molecular_function//metal ion binding//cation binding//catalytic activity//electron carrier activity
Csa1G613580	nuclear transcription factor Y subunit A-1-like; K08064 nuclear transcription factor Y, alpha	http://www.genome.jp/dbget-bin/www_bget?csv:101212860	GO:0080090//GO:0044249//GO:0008152//GO:0031667//GO:0090304//GO:0044238//GO:0031669//GO:0010468//GO:0010556//GO:0031326//GO:0060255//GO:2001141//GO:0018130//GO:0031668//GO:0034645//GO:0044271//GO:0044237//GO:0051716//GO:0050789//GO:0009059//GO:0033554//GO:0034641//GO:0009889//GO:0009991//GO:0016070//GO:0044260//GO:0006807//GO:0009605//GO:0046483//GO:0019438//GO:0042594//GO:0010467//GO:0019222//GO:…	regulation of primary metabolic process//cellular biosynthetic process//metabolic process//response to nutrient levels//nucleic acid metabolic process//primary metabolic process//cellular response to nutrient levels//regulation of gene expression//regulation of macromolecule biosynthetic process//regulation of cellular biosynthetic process//regulation of macromolecule metabolic process//regulatio…	GO:0043226//GO:0043231//GO:0044464//GO:0005622//GO:0005634//GO:0043227//GO:0043229//GO:0016020//GO:0005575//GO:0044424//GO:0005623	organelle//intracellular membrane-bounded organelle//cell part//intracellular//nucleus//membrane-bounded organelle//intracellular organelle//membrane//cellular_component//intracellular part//cell	GO:0003700//GO:0001071//GO:0003674	sequence-specific DNA binding transcription factor activity//nucleic acid binding transcription factor activity//molecular_function
Csa1G617370	serine--glyoxylate aminotransferase-like; K00830 alanine-glyoxylate transaminase / serine-glyoxylate transaminase / serine-pyruvate transaminase [EC:2.6.1.44 2.6.1.45 2.6.1.51]	http://www.genome.jp/dbget-bin/www_bget?csv:101217893	GO:0008152//GO:0008150	metabolic process//biological_process	--	--	--	--
Csa1G620390	isoleucine N-monooxygenase 1-like; K12153 phenylalanine N-monooxygenase [EC:1.14.13.124]	http://www.genome.jp/dbget-bin/www_bget?csv:101217397	GO:0008152//GO:0008150//GO:0055114	metabolic process//biological_process//oxidation-reduction process	--	--	GO:0043167//GO:0005488//GO:0020037//GO:0016491//GO:0046914//GO:0005506//GO:0097159//GO:0003824//GO:0043169//GO:0046872//GO:0016705//GO:0046906//GO:0009055//GO:0003674	ion binding//binding//heme binding//oxidoreductase activity//transition metal ion binding//iron ion binding//organic cyclic compound binding//catalytic activity//cation binding//metal ion binding//oxidoreductase activity, acting on paired donors, with incorporation or reduction of molecular oxygen//tetrapyrrole binding//electron carrier activity//molecular_function
Csa1G627400	magnesium transporter NIPA2-like	http://www.genome.jp/dbget-bin/www_bget?csv:101218370	--	--	GO:0044425//GO:0016021//GO:0031224//GO:0005575//GO:0016020	membrane part//integral to membrane//intrinsic to membrane//cellular_component//membrane	--	--
Csa1G630330	chlorophyll a-b binding protein 8, chloroplastic-like; K08909 light-harvesting complex I chlorophyll a/b binding protein 3	http://www.genome.jp/dbget-bin/www_bget?csv:101202993	GO:0034641//GO:0006310//GO:0044237//GO:0090304//GO:0044238//GO:0008152//GO:0009987//GO:0071704//GO:0043170//GO:0006725//GO:0008150//GO:0006139//GO:0006807//GO:0046483//GO:0044260//GO:0006259	cellular nitrogen compound metabolic process//DNA recombination//cellular metabolic process//nucleic acid metabolic process//primary metabolic process//metabolic process//cellular process//organic substance metabolic process//macromolecule metabolic process//cellular aromatic compound metabolic process//biological_process//nucleobase-containing compound metabolic process//nitrogen compound metabo…	--	--	GO:0097159//GO:0000150//GO:0005488//GO:0003674//GO:0003824//GO:0003677//GO:0003676	organic cyclic compound binding//recombinase activity//binding//molecular_function//catalytic activity//DNA binding//nucleic acid binding
Csa1G633400	uncharacterized LOC101228893	http://www.genome.jp/dbget-bin/www_bget?csv:101228893	GO:0016071//GO:0044265//GO:0016070//GO:0044260//GO:0009057//GO:0006725//GO:0006139//GO:0008150//GO:0006807//GO:0046483//GO:0034655//GO:0071704//GO:0043170//GO:0019439//GO:0046700//GO:0009987//GO:0006401//GO:0008152//GO:0044270//GO:0006402//GO:0009056//GO:0044238//GO:0090304//GO:0044248//GO:0044237//GO:0034641	mRNA metabolic process//cellular macromolecule catabolic process//RNA metabolic process//cellular macromolecule metabolic process//macromolecule catabolic process//cellular aromatic compound metabolic process//nucleobase-containing compound metabolic process//biological_process//nitrogen compound metabolic process//heterocycle metabolic process//nucleobase-containing compound catabolic process//o…	GO:0043229//GO:0043227//GO:0005575//GO:0005623//GO:0044424//GO:0044464//GO:0043231//GO:0043226//GO:0005737//GO:0005622//GO:0005634	intracellular organelle//membrane-bounded organelle//cellular_component//cell//intracellular part//cell part//intracellular membrane-bounded organelle//organelle//cytoplasm//intracellular//nucleus	GO:0003723//GO:0003676//GO:0016896//GO:0004527//GO:0003824//GO:0043169//GO:0016788//GO:0046872//GO:0004535//GO:0016796//GO:0003674//GO:0004518//GO:0008408//GO:0004540//GO:0004532//GO:0043167//GO:0005488//GO:0016787//GO:0097159//GO:0000175	RNA binding//nucleic acid binding//exoribonuclease activity, producing 5'-phosphomonoesters//exonuclease activity//catalytic activity//cation binding//hydrolase activity, acting on ester bonds//metal ion binding//poly(A)-specific ribonuclease activity//exonuclease activity, active with either ribo- or deoxyribonucleic acids and producing 5'-phosphomonoesters//molecular_function//nuclease activity…
Csa1G637950	uncharacterized LOC101221615	http://www.genome.jp/dbget-bin/www_bget?csv:101221615	--	--	--	--	--	--
Csa1G638510	uncharacterized LOC101222078	http://www.genome.jp/dbget-bin/www_bget?csv:101222078	GO:0008152//GO:0009058//GO:0008150	metabolic process//biosynthetic process//biological_process	--	--	GO:0016787//GO:0003674//GO:0016788//GO:0003824	hydrolase activity//molecular_function//hydrolase activity, acting on ester bonds//catalytic activity
Csa1G657480	probable WRKY transcription factor 2-like; K18835 WRKY transcription factor 2	http://www.genome.jp/dbget-bin/www_bget?csv:101206605	GO:0016070//GO:0044260//GO:0051252//GO:0006725//GO:0006139//GO:0008150//GO:0032774//GO:0019219//GO:0019222//GO:0006807//GO:0010467//GO:0046483//GO:0019438//GO:0071704//GO:0051171//GO:0006351//GO:0043170//GO:0050794//GO:0006355//GO:2000112//GO:0034654//GO:0009058//GO:0031323//GO:0009987//GO:0065007//GO:0008152//GO:0044249//GO:0080090//GO:0060255//GO:0018130//GO:2001141//GO:0010468//GO:0010556//GO:…	RNA metabolic process//cellular macromolecule metabolic process//regulation of RNA metabolic process//cellular aromatic compound metabolic process//nucleobase-containing compound metabolic process//biological_process//RNA biosynthetic process//regulation of nucleobase-containing compound metabolic process//regulation of metabolic process//nitrogen compound metabolic process//gene expression//hete…	--	--	GO:0003677//GO:0003676//GO:0003674//GO:0003700//GO:0005488//GO:0097159//GO:0001071//GO:0043565	DNA binding//nucleic acid binding//molecular_function//sequence-specific DNA binding transcription factor activity//binding//organic cyclic compound binding//nucleic acid binding transcription factor activity//sequence-specific DNA binding
Csa1G665900	uncharacterized LOC101217511	http://www.genome.jp/dbget-bin/www_bget?csv:101217511	--	--	--	--	GO:0005488//GO:0005515//GO:0003674//GO:0031072	binding//protein binding//molecular_function//heat shock protein binding
Csa1G674540	uncharacterized LOC101207174	http://www.genome.jp/dbget-bin/www_bget?csv:101207174	--	--	GO:0031224//GO:0005575//GO:0016020//GO:0044425//GO:0016021	intrinsic to membrane//cellular_component//membrane//membrane part//integral to membrane	--	--
Csa1G690150	phosphoenolpyruvate carboxylase kinase 1-like	http://www.genome.jp/dbget-bin/www_bget?csv:101213675	GO:0006629//GO:0009059//GO:0016310//GO:0016051//GO:0034645//GO:0044267//GO:0044237//GO:0044238//GO:0043412//GO:0006464//GO:0044249//GO:0006468//GO:0008152//GO:0006793//GO:0044264//GO:0006796//GO:0008610//GO:0019538//GO:0009058//GO:0009987//GO:0043170//GO:0005975//GO:0005976//GO:0044262//GO:0071704//GO:0044255//GO:0034637//GO:0008653//GO:0008150//GO:0044260//GO:0009103//GO:0033692//GO:0000271	lipid metabolic process//macromolecule biosynthetic process//phosphorylation//carbohydrate biosynthetic process//cellular macromolecule biosynthetic process//cellular protein metabolic process//cellular metabolic process//primary metabolic process//macromolecule modification//protein modification process//cellular biosynthetic process//protein phosphorylation//metabolic process//phosphorus metabo…	GO:0005575//GO:0016020	cellular_component//membrane	GO:0032559//GO:0004672//GO:0043168//GO:0097159//GO:0001882//GO:0032550//GO:0000166//GO:0016773//GO:0043167//GO:0032549//GO:0005488//GO:0032555//GO:0035639//GO:0016740//GO:0005524//GO:0017076//GO:0016301//GO:0030554//GO:0003674//GO:0032553//GO:0003824//GO:0001883//GO:0016772	adenyl ribonucleotide binding//protein kinase activity//anion binding//organic cyclic compound binding//nucleoside binding//purine ribonucleoside binding//nucleotide binding//phosphotransferase activity, alcohol group as acceptor//ion binding//ribonucleoside binding//binding//purine ribonucleotide binding//purine ribonucleoside triphosphate binding//transferase activity//ATP binding//purine nucle…
Csa1G690280	uncharacterized LOC101231793	http://www.genome.jp/dbget-bin/www_bget?csv:101231793	--	--	--	--	--	--
Csa1G695390	serine/threonine-protein kinase WNK1-like; K08867 WNK lysine deficient protein kinase [EC:2.7.11.1]	http://www.genome.jp/dbget-bin/www_bget?csv:101222641	GO:2000112//GO:0019538//GO:0009058//GO:0031323//GO:0009987//GO:0065007//GO:0071704//GO:0051171//GO:0043170//GO:0050794//GO:0006725//GO:0006139//GO:0008150//GO:0019219//GO:0006275//GO:0019222//GO:0006807//GO:0046483//GO:0006259//GO:0044260//GO:0009889//GO:0006261//GO:0016310//GO:0034641//GO:0009059//GO:0044267//GO:0050789//GO:0044237//GO:0034645//GO:0051052//GO:0060255//GO:0010556//GO:0031326//GO:…	regulation of cellular macromolecule biosynthetic process//protein metabolic process//biosynthetic process//regulation of cellular metabolic process//cellular process//biological regulation//organic substance metabolic process//regulation of nitrogen compound metabolic process//macromolecule metabolic process//regulation of cellular process//cellular aromatic compound metabolic process//nucleobas…	--	--	GO:0005524//GO:0030554//GO:0003674//GO:0032553//GO:0017076//GO:0016301//GO:0003824//GO:0001883//GO:0003677//GO:0003676//GO:0016772//GO:0004672//GO:0032559//GO:0097159//GO:0001882//GO:0032550//GO:0000166//GO:0043565//GO:0043168//GO:0043167//GO:0032549//GO:0005488//GO:0016773//GO:0016740//GO:0035639//GO:0032555	ATP binding//adenyl nucleotide binding//molecular_function//ribonucleotide binding//purine nucleotide binding//kinase activity//catalytic activity//purine nucleoside binding//DNA binding//nucleic acid binding//transferase activity, transferring phosphorus-containing groups//protein kinase activity//adenyl ribonucleotide binding//organic cyclic compound binding//nucleoside binding//purine ribonucl…
Csa1G699550	uncharacterized LOC101203162	http://www.genome.jp/dbget-bin/www_bget?csv:101203162	--	--	--	--	--	--
Csa1G699560	ubiquinol oxidase 4, chloroplastic/chromoplastic-like; K17893 ubiquinol oxidase [EC:1.10.3.11]	http://www.genome.jp/dbget-bin/www_bget?csv:101214740	GO:0008152//GO:0007585//GO:0055114//GO:0032501//GO:0008150	metabolic process//respiratory gaseous exchange//oxidation-reduction process//multicellular organismal process//biological_process	GO:0005622//GO:0044446//GO:0044422//GO:0031975//GO:0005739//GO:0044464//GO:0043231//GO:0005737//GO:0043226//GO:0005575//GO:0005623//GO:0044424//GO:0005740//GO:0044429//GO:0031967//GO:0044444//GO:0043229//GO:0043227	intracellular//intracellular organelle part//organelle part//envelope//mitochondrion//cell part//intracellular membrane-bounded organelle//cytoplasm//organelle//cellular_component//cell//intracellular part//mitochondrial envelope//mitochondrial part//organelle envelope//cytoplasmic part//intracellular organelle//membrane-bounded organelle	--	--
Csa1G699610	ubiquinol oxidase 4, chloroplastic/chromoplastic-like; K17893 ubiquinol oxidase [EC:1.10.3.11]	http://www.genome.jp/dbget-bin/www_bget?csv:101214740	GO:0007585//GO:0008152//GO:0055114//GO:0032501//GO:0008150	respiratory gaseous exchange//metabolic process//oxidation-reduction process//multicellular organismal process//biological_process	GO:0005622//GO:0044446//GO:0044422//GO:0031975//GO:0005739//GO:0044464//GO:0043231//GO:0005737//GO:0043226//GO:0005575//GO:0005623//GO:0044424//GO:0005740//GO:0044429//GO:0031967//GO:0044444//GO:0043229//GO:0043227	intracellular//intracellular organelle part//organelle part//envelope//mitochondrion//cell part//intracellular membrane-bounded organelle//cytoplasm//organelle//cellular_component//cell//intracellular part//mitochondrial envelope//mitochondrial part//organelle envelope//cytoplasmic part//intracellular organelle//membrane-bounded organelle	--	--
Csa1G703070	protein PHLOEM PROTEIN 2-LIKE A1-like	http://www.genome.jp/dbget-bin/www_bget?csv:101220374	--	--	--	--	--	--
Csa1G703580	protein PHLOEM PROTEIN 2-LIKE A9-like	http://www.genome.jp/dbget-bin/www_bget?csv:101232631	--	--	GO:0005575//GO:0005576	cellular_component//extracellular region	GO:0016787//GO:0016798//GO:0003824//GO:0003674	hydrolase activity//hydrolase activity, acting on glycosyl bonds//catalytic activity//molecular_function
Csa1G713660	putative E3 ubiquitin-protein ligase LIN-like	http://www.genome.jp/dbget-bin/www_bget?csv:101208727	GO:0006816//GO:0006812//GO:0006810//GO:0051925//GO:0030001//GO:0070838//GO:0072511//GO:0051234//GO:0051179//GO:0008150//GO:0006811	calcium ion transport//cation transport//transport//regulation of calcium ion transport via voltage-gated calcium channel activity//metal ion transport//divalent metal ion transport//divalent inorganic cation transport//establishment of localization//localization//biological_process//ion transport	--	--	GO:0022843//GO:0022838//GO:0022891//GO:0005215//GO:0015075//GO:0005244//GO:0005216//GO:0022890//GO:0005245//GO:0005262//GO:0015085//GO:0072509//GO:0022836//GO:0005261//GO:0008324//GO:0022857//GO:0046873//GO:0022832//GO:0003674//GO:0022839//GO:0015267//GO:0022892//GO:0022803	voltage-gated cation channel activity//substrate-specific channel activity//substrate-specific transmembrane transporter activity//transporter activity//ion transmembrane transporter activity//voltage-gated ion channel activity//ion channel activity//inorganic cation transmembrane transporter activity//voltage-gated calcium channel activity//calcium channel activity//calcium ion transmembrane tra…
Csa2G000010	probable inactive leucine-rich repeat receptor-like protein kinase At5g20690-like	http://www.genome.jp/dbget-bin/www_bget?csv:101215919	GO:0044267//GO:0044237//GO:0016310//GO:0006793//GO:0008152//GO:0006468//GO:0006796//GO:0006464//GO:0043412//GO:0044238//GO:0071704//GO:0043170//GO:0019538//GO:0009987//GO:0044260//GO:0008150	cellular protein metabolic process//cellular metabolic process//phosphorylation//phosphorus metabolic process//metabolic process//protein phosphorylation//phosphate-containing compound metabolic process//protein modification process//macromolecule modification//primary metabolic process//organic substance metabolic process//macromolecule metabolic process//protein metabolic process//cellular proc…	--	--	GO:0032550//GO:0001882//GO:0097159//GO:0000166//GO:0043168//GO:0004672//GO:0032559//GO:0016740//GO:0032555//GO:0035639//GO:0005488//GO:0032549//GO:0043167//GO:0016773//GO:0032553//GO:0030554//GO:0003674//GO:0016301//GO:0017076//GO:0005524//GO:0005515//GO:0016772//GO:0003824//GO:0001883	purine ribonucleoside binding//nucleoside binding//organic cyclic compound binding//nucleotide binding//anion binding//protein kinase activity//adenyl ribonucleotide binding//transferase activity//purine ribonucleotide binding//purine ribonucleoside triphosphate binding//binding//ribonucleoside binding//ion binding//phosphotransferase activity, alcohol group as acceptor//ribonucleotide binding//a…
Csa2G000100	adipocyte plasma membrane-associated protein-like	http://www.genome.jp/dbget-bin/www_bget?csv:101215445	GO:0008150//GO:0009058//GO:0008152	biological_process//biosynthetic process//metabolic process	GO:0016020//GO:0005575	membrane//cellular_component	GO:0016843//GO:0003824//GO:0016788//GO:0016840//GO:0052689//GO:0060089//GO:0003674//GO:0004871//GO:0038023//GO:0016787//GO:0004064//GO:0004872//GO:0004888//GO:0016829//GO:0004930//GO:0016844	amine-lyase activity//catalytic activity//hydrolase activity, acting on ester bonds//carbon-nitrogen lyase activity//carboxylic ester hydrolase activity//molecular transducer activity//molecular_function//signal transducer activity//signaling receptor activity//hydrolase activity//arylesterase activity//receptor activity//transmembrane signaling receptor activity//lyase activity//G-protein couple…
Csa2G000210	protein ELF4-LIKE 3-like	http://www.genome.jp/dbget-bin/www_bget?csv:101227108	--	--	--	--	--	--
Csa2G000280	threonine synthase, chloroplastic-like; K01733 threonine synthase [EC:4.2.3.1]	http://www.genome.jp/dbget-bin/www_bget?csv:101226430	GO:0008152//GO:0008150	metabolic process//biological_process	--	--	GO:0016829//GO:0043168//GO:0016831//GO:0043167//GO:0005488//GO:0016830//GO:0030170//GO:0048037//GO:0003674//GO:0003824	lyase activity//anion binding//carboxy-lyase activity//ion binding//binding//carbon-carbon lyase activity//pyridoxal phosphate binding//cofactor binding//molecular_function//catalytic activity
Csa2G000530	pentatricopeptide repeat-containing protein At2g15690-like	http://www.genome.jp/dbget-bin/www_bget?csv:101212556	--	--	--	--	--	--
Csa2G000660	gamma-glutamyltranspeptidase 1-like; K18592 gamma-glutamyltranspeptidase / glutathione hydrolase / leukotriene-C4 hydrolase [EC:2.3.2.2 3.4.19.13 3.4.19.14]	http://www.genome.jp/dbget-bin/www_bget?csv:101221216	--	--	--	--	GO:0016746//GO:0016740//GO:0003674//GO:0016755//GO:0003840//GO:0003824	transferase activity, transferring acyl groups//transferase activity//molecular_function//transferase activity, transferring amino-acyl groups//gamma-glutamyltransferase activity//catalytic activity
Csa2G000670	--	--	--	--	--	--	--	--
Csa2G000700	putative dual specificity protein phosphatase DSP8-like	http://www.genome.jp/dbget-bin/www_bget?csv:101220751	GO:0009987//GO:0019538//GO:0071704//GO:0043170//GO:0008150//GO:0044260//GO:0016311//GO:0044237//GO:0044267//GO:0006464//GO:0006470//GO:0043412//GO:0044238//GO:0006796//GO:0006793//GO:0008152	cellular process//protein metabolic process//organic substance metabolic process//macromolecule metabolic process//biological_process//cellular macromolecule metabolic process//dephosphorylation//cellular metabolic process//cellular protein metabolic process//protein modification process//protein dephosphorylation//macromolecule modification//primary metabolic process//phosphate-containing compou…	--	--	GO:0016791//GO:0003674//GO:0008138//GO:0016788//GO:0003824//GO:0004725//GO:0042578//GO:0016787//GO:0004721	phosphatase activity//molecular_function//protein tyrosine/serine/threonine phosphatase activity//hydrolase activity, acting on ester bonds//catalytic activity//protein tyrosine phosphatase activity//phosphoric ester hydrolase activity//hydrolase activity//phosphoprotein phosphatase activity
Csa2G000920	E3 ubiquitin-protein ligase RING1-like	http://www.genome.jp/dbget-bin/www_bget?csv:101230033	--	--	GO:0044428//GO:0000152//GO:0043231//GO:0043226//GO:0044464//GO:0043234//GO:0044422//GO:0005622//GO:0044446//GO:0005634//GO:0031461//GO:0000151//GO:0005680//GO:0043229//GO:0043227//GO:0032991//GO:0005575//GO:0005623//GO:0044424	nuclear part//nuclear ubiquitin ligase complex//intracellular membrane-bounded organelle//organelle//cell part//protein complex//organelle part//intracellular//intracellular organelle part//nucleus//cullin-RING ubiquitin ligase complex//ubiquitin ligase complex//anaphase-promoting complex//intracellular organelle//membrane-bounded organelle//macromolecular complex//cellular_component//cell//intra…	GO:0004842//GO:0016879//GO:0005488//GO:0043167//GO:0008270//GO:0046914//GO:0016881//GO:0016874//GO:0046872//GO:0003824//GO:0019787//GO:0043169//GO:0003674//GO:0005515	ubiquitin-protein ligase activity//ligase activity, forming carbon-nitrogen bonds//binding//ion binding//zinc ion binding//transition metal ion binding//acid-amino acid ligase activity//ligase activity//metal ion binding//catalytic activity//small conjugating protein ligase activity//cation binding//molecular_function//protein binding
Csa2G004690	heat stress transcription factor C-1-like; K09419 heat shock transcription factor, other eukaryote	http://www.genome.jp/dbget-bin/www_bget?csv:101225560	GO:0008150//GO:0006139//GO:0051252//GO:0006725//GO:0019219//GO:0032774//GO:0019222//GO:0019438//GO:0046483//GO:0010467//GO:0006807//GO:0044260//GO:0016070//GO:2000112//GO:0034654//GO:0009987//GO:0031323//GO:0009058//GO:0065007//GO:0006351//GO:0051171//GO:0071704//GO:0050794//GO:0043170//GO:0006355//GO:2001141//GO:0018130//GO:0060255//GO:0010556//GO:0031326//GO:0010468//GO:0090304//GO:0044238//GO:…	biological_process//nucleobase-containing compound metabolic process//regulation of RNA metabolic process//cellular aromatic compound metabolic process//regulation of nucleobase-containing compound metabolic process//RNA biosynthetic process//regulation of metabolic process//aromatic compound biosynthetic process//heterocycle metabolic process//gene expression//nitrogen compound metabolic process…	GO:0043229//GO:0043227//GO:0005623//GO:0044424//GO:0005575//GO:0044464//GO:0043231//GO:0043226//GO:0005634//GO:0005622	intracellular organelle//membrane-bounded organelle//cell//intracellular part//cellular_component//cell part//intracellular membrane-bounded organelle//organelle//nucleus//intracellular	GO:0003676//GO:0003677//GO:0003674//GO:0005488//GO:0003700//GO:0097159//GO:0043565//GO:0001071	nucleic acid binding//DNA binding//molecular_function//binding//sequence-specific DNA binding transcription factor activity//organic cyclic compound binding//sequence-specific DNA binding//nucleic acid binding transcription factor activity
Csa2G004700	pentatricopeptide repeat-containing protein At4g38010-like	http://www.genome.jp/dbget-bin/www_bget?csv:101227375	--	--	--	--	--	--
Csa2G004720	multiprotein-bridging factor 1c-like; K03627 putative transcription factor	http://www.genome.jp/dbget-bin/www_bget?csv:101226552	--	--	--	--	GO:0003676//GO:0003677//GO:0003674//GO:0005488//GO:0097159//GO:0043565	nucleic acid binding//DNA binding//molecular_function//binding//organic cyclic compound binding//sequence-specific DNA binding
Csa2G005310	protein VERNALIZATION INSENSITIVE 3-like	http://www.genome.jp/dbget-bin/www_bget?csv:101229338	--	--	--	--	GO:0005488//GO:0005515//GO:0003674	binding//protein binding//molecular_function
Csa2G005900	probable inactive receptor kinase At2g26730-like	http://www.genome.jp/dbget-bin/www_bget?csv:101205802	GO:0044249//GO:0006793//GO:0008152//GO:0006468//GO:0006796//GO:0015947//GO:0043412//GO:0044238//GO:0006464//GO:0043447//GO:0009061//GO:0015980//GO:0044267//GO:0044237//GO:0016310//GO:0044260//GO:0015975//GO:0055114//GO:0008150//GO:0045333//GO:0043170//GO:0043446//GO:0015948//GO:0071704//GO:0006091//GO:0019538//GO:0009987//GO:0009058	cellular biosynthetic process//phosphorus metabolic process//metabolic process//protein phosphorylation//phosphate-containing compound metabolic process//methane metabolic process//macromolecule modification//primary metabolic process//protein modification process//alkane biosynthetic process//anaerobic respiration//energy derivation by oxidation of organic compounds//cellular protein metabolic p…	GO:0044459//GO:0044464//GO:0071944//GO:0043234//GO:0044425//GO:0016010//GO:0016012//GO:0016020//GO:0005886//GO:0032991//GO:0016011//GO:0005575//GO:0005623	plasma membrane part//cell part//cell periphery//protein complex//membrane part//dystrophin-associated glycoprotein complex//sarcoglycan complex//membrane//plasma membrane//macromolecular complex//dystroglycan complex//cellular_component//cell	GO:0035639//GO:0032555//GO:0016740//GO:0042086//GO:0016773//GO:0032549//GO:0005488//GO:0043167//GO:0008168//GO:0043168//GO:0032550//GO:0001882//GO:0097159//GO:0000166//GO:0030269//GO:0032559//GO:0004672//GO:0016772//GO:0003824//GO:0001883//GO:0008172//GO:0016741//GO:0016301//GO:0017076//GO:0032553//GO:0030554//GO:0003674//GO:0005515//GO:0005524	purine ribonucleoside triphosphate binding//purine ribonucleotide binding//transferase activity//5-methyl-5,6,7,8-tetrahydromethanopterin-dependent methyltransferase activity//phosphotransferase activity, alcohol group as acceptor//ribonucleoside binding//binding//ion binding//methyltransferase activity//anion binding//purine ribonucleoside binding//nucleoside binding//organic cyclic compound bin…
Csa2G006870	blue copper protein-like	http://www.genome.jp/dbget-bin/www_bget?csv:101219397	--	--	GO:0005576//GO:0005575	extracellular region//cellular_component	GO:0050840//GO:0005507//GO:0003674//GO:0046872//GO:0043169//GO:0009055//GO:0046914//GO:0005488//GO:0043167	extracellular matrix binding//copper ion binding//molecular_function//metal ion binding//cation binding//electron carrier activity//transition metal ion binding//binding//ion binding
Csa2G006880	uncharacterized LOC101231385	http://www.genome.jp/dbget-bin/www_bget?csv:101231385	--	--	--	--	GO:0009055//GO:0046872//GO:0043169//GO:0005507//GO:0003674//GO:0043167//GO:0005488//GO:0046914	electron carrier activity//metal ion binding//cation binding//copper ion binding//molecular_function//ion binding//binding//transition metal ion binding
Csa2G007390	uncharacterized LOC101205660	http://www.genome.jp/dbget-bin/www_bget?csv:101205660	--	--	--	--	--	--
Csa2G008000	putative disease resistance protein RGA1-like	http://www.genome.jp/dbget-bin/www_bget?csv:101205183	GO:0006310//GO:0033554//GO:0034641//GO:0051716//GO:0044237//GO:0090304//GO:0044238//GO:0006974//GO:0006281//GO:0008152//GO:0009987//GO:0043170//GO:0006950//GO:0071704//GO:0006807//GO:0046483//GO:0006725//GO:0006139//GO:0008150//GO:0050896//GO:0006259//GO:0044260//GO:0055114	DNA recombination//cellular response to stress//cellular nitrogen compound metabolic process//cellular response to stimulus//cellular metabolic process//nucleic acid metabolic process//primary metabolic process//response to DNA damage stimulus//DNA repair//metabolic process//cellular process//macromolecule metabolic process//response to stress//organic substance metabolic process//nitrogen compou…	--	--	GO:0032559//GO:0017111//GO:0016779//GO:0016462//GO:0043168//GO:0097159//GO:0001882//GO:0032550//GO:0000166//GO:0043531//GO:0016787//GO:0016491//GO:0009378//GO:0016818//GO:0043167//GO:0032549//GO:0005488//GO:0032555//GO:0035639//GO:0003678//GO:0050661//GO:0016740//GO:0005515//GO:0050662//GO:0005524//GO:0017076//GO:0048037//GO:0032553//GO:0030554//GO:0003674//GO:0003824//GO:0001883//GO:0016772//GO:…	adenyl ribonucleotide binding//nucleoside-triphosphatase activity//nucleotidyltransferase activity//pyrophosphatase activity//anion binding//organic cyclic compound binding//nucleoside binding//purine ribonucleoside binding//nucleotide binding//ADP binding//hydrolase activity//oxidoreductase activity//four-way junction helicase activity//hydrolase activity, acting on acid anhydrides, in phosphoru…
Csa2G008140	probable anion transporter 6, chloroplastic-like; K08193 MFS transporter, ACS family, solute carrier family 17 (sodium-dependent inorganic phosphate cotransporter), other	http://www.genome.jp/dbget-bin/www_bget?csv:101204207	GO:0006810//GO:0055085//GO:0051234//GO:0051179//GO:0008150//GO:0009987	transport//transmembrane transport//establishment of localization//localization//biological_process//cellular process	GO:0044425//GO:0016021//GO:0016020//GO:0031224//GO:0005575	membrane part//integral to membrane//membrane//intrinsic to membrane//cellular_component	GO:0005215//GO:0022857//GO:0003674	transporter activity//transmembrane transporter activity//molecular_function
Csa2G008710	outer membrane lipoprotein blc-like; K03098 apolipoprotein D and lipocalin family protein	http://www.genome.jp/dbget-bin/www_bget?csv:101225685	--	--	--	--	--	--
Csa2G009340	peptidyl-prolyl cis-trans isomerase CYP20-2, chloroplastic-like; K03768 peptidyl-prolyl cis-trans isomerase B (cyclophilin B) [EC:5.2.1.8]	http://www.genome.jp/dbget-bin/www_bget?csv:101228117	GO:0071704//GO:0043170//GO:0009987//GO:0019538//GO:0044260//GO:0008150//GO:0044237//GO:0044267//GO:0008152//GO:0006457//GO:0044238	organic substance metabolic process//macromolecule metabolic process//cellular process//protein metabolic process//cellular macromolecule metabolic process//biological_process//cellular metabolic process//cellular protein metabolic process//metabolic process//protein folding//primary metabolic process	--	--	GO:0003674//GO:0016859//GO:0003755//GO:0003824//GO:0016853	molecular_function//cis-trans isomerase activity//peptidyl-prolyl cis-trans isomerase activity//catalytic activity//isomerase activity
Csa2G009360	E3 ubiquitin-protein ligase RING1-like	http://www.genome.jp/dbget-bin/www_bget?csv:101228340	GO:0006810//GO:0006811//GO:0051234//GO:0008150//GO:0051179	transport//ion transport//establishment of localization//biological_process//localization	GO:0005622//GO:0044446//GO:0044422//GO:0005634//GO:0000151//GO:0031461//GO:0044428//GO:0044464//GO:0043234//GO:0043231//GO:0000152//GO:0043226//GO:0005575//GO:0005623//GO:0044424//GO:0005680//GO:0032991//GO:0016020//GO:0043229//GO:0043227	intracellular//intracellular organelle part//organelle part//nucleus//ubiquitin ligase complex//cullin-RING ubiquitin ligase complex//nuclear part//cell part//protein complex//intracellular membrane-bounded organelle//nuclear ubiquitin ligase complex//organelle//cellular_component//cell//intracellular part//anaphase-promoting complex//macromolecular complex//membrane//intracellular organelle//mem…	GO:0016881//GO:0016879//GO:0004842//GO:0003674//GO:0016874//GO:0019787//GO:0003824	acid-amino acid ligase activity//ligase activity, forming carbon-nitrogen bonds//ubiquitin-protein ligase activity//molecular_function//ligase activity//small conjugating protein ligase activity//catalytic activity
Csa2G009430	uncharacterized LOC101209187	http://www.genome.jp/dbget-bin/www_bget?csv:101209187	--	--	GO:0044425//GO:0016021//GO:0031224//GO:0005575//GO:0016020	membrane part//integral to membrane//intrinsic to membrane//cellular_component//membrane	--	--
Csa2G009440	uncharacterized LOC101229451	http://www.genome.jp/dbget-bin/www_bget?csv:101229451	--	--	--	--	--	--
Csa2G009470	NADP-dependent glyceraldehyde-3-phosphate dehydrogenase-like; K00131 glyceraldehyde-3-phosphate dehydrogenase (NADP+) [EC:1.2.1.9]	http://www.genome.jp/dbget-bin/www_bget?csv:101208699	GO:0055114//GO:0008150//GO:0016043//GO:0009987//GO:0008218//GO:0008152//GO:0006996//GO:0007010//GO:0044237//GO:0071840	oxidation-reduction process//biological_process//cellular component organization//cellular process//bioluminescence//metabolic process//organelle organization//cytoskeleton organization//cellular metabolic process//cellular component organization or biogenesis	--	--	GO:0003824//GO:0003995//GO:0003674//GO:0005515//GO:0003779//GO:0016627//GO:0005488//GO:0016491//GO:0008092	catalytic activity//acyl-CoA dehydrogenase activity//molecular_function//protein binding//actin binding//oxidoreductase activity, acting on the CH-CH group of donors//binding//oxidoreductase activity//cytoskeletal protein binding
Csa2G009490	CBL-interacting serine/threonine-protein kinase 6-like	http://www.genome.jp/dbget-bin/www_bget?csv:101208458	GO:0008610//GO:0019538//GO:0009058//GO:0009987//GO:0065007//GO:0005976//GO:0044262//GO:0071704//GO:0043170//GO:0050794//GO:0005975//GO:0008150//GO:0007154//GO:0050896//GO:0044255//GO:0034637//GO:0008653//GO:0000271//GO:0007165//GO:0044260//GO:0009103//GO:0033692//GO:0016310//GO:0016051//GO:0006629//GO:0023052//GO:0009059//GO:0044267//GO:0051716//GO:0050789//GO:0044237//GO:0034645//GO:0006464//GO:…	lipid biosynthetic process//protein metabolic process//biosynthetic process//cellular process//biological regulation//polysaccharide metabolic process//cellular carbohydrate metabolic process//organic substance metabolic process//macromolecule metabolic process//regulation of cellular process//carbohydrate metabolic process//biological_process//cell communication//response to stimulus//cellular l…	GO:0005575//GO:0016020	cellular_component//membrane	GO:0005524//GO:0003674//GO:0030554//GO:0032553//GO:0017076//GO:0016301//GO:0003824//GO:0001883//GO:0016772//GO:0004672//GO:0032559//GO:0097159//GO:0001882//GO:0032550//GO:0000166//GO:0043168//GO:0043167//GO:0032549//GO:0005488//GO:0016773//GO:0016740//GO:0032555//GO:0035639	ATP binding//molecular_function//adenyl nucleotide binding//ribonucleotide binding//purine nucleotide binding//kinase activity//catalytic activity//purine nucleoside binding//transferase activity, transferring phosphorus-containing groups//protein kinase activity//adenyl ribonucleotide binding//organic cyclic compound binding//nucleoside binding//purine ribonucleoside binding//nucleotide binding/…
Csa2G010250	uncharacterized LOC101205893	http://www.genome.jp/dbget-bin/www_bget?csv:101205893	--	--	--	--	--	--
Csa2G010380	pathogenesis-related protein P2-like	http://www.genome.jp/dbget-bin/www_bget?csv:101203229	GO:0042742//GO:0006952//GO:0051704//GO:0009617//GO:0006950//GO:0009620//GO:0050832//GO:0008150//GO:0009607//GO:0050896//GO:0051707	defense response to bacterium//defense response//multi-organism process//response to bacterium//response to stress//response to fungus//defense response to fungus//biological_process//response to biotic stimulus//response to stimulus//response to other organism	--	--	--	--
Csa2G010920	auxin-responsive protein IAA16-like; K14484 auxin-responsive protein IAA	http://www.genome.jp/dbget-bin/www_bget?csv:101216767	GO:0080090//GO:0044249//GO:0008152//GO:0090304//GO:0044238//GO:0010468//GO:0031326//GO:0010556//GO:0060255//GO:2001141//GO:0018130//GO:0034645//GO:0044271//GO:0044237//GO:0050789//GO:0009059//GO:0034641//GO:0009889//GO:0044260//GO:0016070//GO:0006807//GO:0019438//GO:0046483//GO:0010467//GO:0019222//GO:0019219//GO:0032774//GO:0006725//GO:0051252//GO:0008150//GO:0006139//GO:0006355//GO:0043170//GO:…	regulation of primary metabolic process//cellular biosynthetic process//metabolic process//nucleic acid metabolic process//primary metabolic process//regulation of gene expression//regulation of cellular biosynthetic process//regulation of macromolecule biosynthetic process//regulation of macromolecule metabolic process//regulation of RNA biosynthetic process//heterocycle biosynthetic process//ce…	GO:0043226//GO:0043231//GO:0044464//GO:0005622//GO:0005634//GO:0043227//GO:0043229//GO:0005575//GO:0044424//GO:0005623	organelle//intracellular membrane-bounded organelle//cell part//intracellular//nucleus//membrane-bounded organelle//intracellular organelle//cellular_component//intracellular part//cell	--	--
Csa2G011450	light-inducible protein CPRF2-like	http://www.genome.jp/dbget-bin/www_bget?csv:101222793	GO:0090304//GO:0044238//GO:0010556//GO:0031326//GO:0010468//GO:0018130//GO:2001141//GO:0060255//GO:0080090//GO:0044249//GO:0008152//GO:0009059//GO:0023052//GO:0034641//GO:0009889//GO:0044271//GO:0034645//GO:0044237//GO:0000160//GO:0050789//GO:0051301//GO:0051716//GO:0010467//GO:0019438//GO:0046483//GO:0006807//GO:0019222//GO:0050896//GO:0019219//GO:0032774//GO:0007154//GO:0006139//GO:0008150//GO:…	nucleic acid metabolic process//primary metabolic process//regulation of macromolecule biosynthetic process//regulation of cellular biosynthetic process//regulation of gene expression//heterocycle biosynthetic process//regulation of RNA biosynthetic process//regulation of macromolecule metabolic process//regulation of primary metabolic process//cellular biosynthetic process//metabolic process//ma…	GO:0000775//GO:0043226//GO:0043231//GO:0043234//GO:0044464//GO:0000793//GO:0016021//GO:0005634//GO:0044422//GO:0044446//GO:0044425//GO:0000779//GO:0043232//GO:0005622//GO:0043227//GO:0043229//GO:0016020//GO:0032991//GO:0005694//GO:0043228//GO:0000776//GO:0044424//GO:0044427//GO:0005623//GO:0000777//GO:0031224//GO:0005575	chromosome, centromeric region//organelle//intracellular membrane-bounded organelle//protein complex//cell part//condensed chromosome//integral to membrane//nucleus//organelle part//intracellular organelle part//membrane part//condensed chromosome, centromeric region//intracellular non-membrane-bounded organelle//intracellular//membrane-bounded organelle//intracellular organelle//membrane//macrom…	GO:0005488//GO:0000156//GO:0003700//GO:0046983//GO:0043515//GO:0001071//GO:0043565//GO:0097159//GO:0003676//GO:0003677//GO:0005515//GO:0060089//GO:0004871//GO:0003674	binding//two-component response regulator activity//sequence-specific DNA binding transcription factor activity//protein dimerization activity//kinetochore binding//nucleic acid binding transcription factor activity//sequence-specific DNA binding//organic cyclic compound binding//nucleic acid binding//DNA binding//protein binding//molecular transducer activity//signal transducer activity//molecul…
Csa2G011460	GDP-mannose 3,5-epimerase 1-like; K10046 GDP-D-mannose 3', 5'-epimerase [EC:5.1.3.18 5.1.3.-]	http://www.genome.jp/dbget-bin/www_bget?csv:101222554	GO:0055114//GO:0000271//GO:0044260//GO:0033692//GO:0008150//GO:0008202//GO:0034637//GO:0005976//GO:0044262//GO:0071704//GO:0043170//GO:0006694//GO:0005975//GO:0008610//GO:0009058//GO:0009987//GO:0008152//GO:0044264//GO:0044249//GO:0045226//GO:0044238//GO:0044237//GO:0034645//GO:0046379//GO:0016051//GO:0006629//GO:0009059	oxidation-reduction process//polysaccharide biosynthetic process//cellular macromolecule metabolic process//cellular polysaccharide biosynthetic process//biological_process//steroid metabolic process//cellular carbohydrate biosynthetic process//polysaccharide metabolic process//cellular carbohydrate metabolic process//organic substance metabolic process//macromolecule metabolic process//steroid b…	--	--	GO:0016614//GO:0003824//GO:0048037//GO:0003674//GO:0016229//GO:0016616//GO:0050662//GO:0008831//GO:0005488//GO:0016491//GO:0003854//GO:0033764	oxidoreductase activity, acting on CH-OH group of donors//catalytic activity//cofactor binding//molecular_function//steroid dehydrogenase activity//oxidoreductase activity, acting on the CH-OH group of donors, NAD or NADP as acceptor//coenzyme binding//dTDP-4-dehydrorhamnose reductase activity//binding//oxidoreductase activity//3-beta-hydroxy-delta5-steroid dehydrogenase activity//steroid dehydro…
Csa2G011470	uncharacterized LOC101222315	http://www.genome.jp/dbget-bin/www_bget?csv:101222315	--	--	--	--	GO:0003674//GO:0003677//GO:0003676//GO:0097159//GO:0005488	molecular_function//DNA binding//nucleic acid binding//organic cyclic compound binding//binding
Csa2G011500	shikimate O-hydroxycinnamoyltransferase-like	http://www.genome.jp/dbget-bin/www_bget?csv:101222079	--	--	GO:0005576//GO:0005575//GO:0044420//GO:0031012//GO:0005581//GO:0005578//GO:0044421	extracellular region//cellular_component//extracellular matrix part//extracellular matrix//collagen//proteinaceous extracellular matrix//extracellular region part	GO:0016747//GO:0003674//GO:0003824//GO:0005201//GO:0016746//GO:0005198//GO:0016740	transferase activity, transferring acyl groups other than amino-acyl groups//molecular_function//catalytic activity//extracellular matrix structural constituent//transferase activity, transferring acyl groups//structural molecule activity//transferase activity
Csa2G011510	peptide-N(4)-(N-acetyl-beta-glucosaminyl)asparagine amidase-like; K01456 peptide-N4-(N-acetyl-beta-glucosaminyl)asparagine amidase [EC:3.5.1.52]	http://www.genome.jp/dbget-bin/www_bget?csv:101221843	GO:0044237//GO:0090407//GO:0051716//GO:0044271//GO:0042455//GO:0034641//GO:0033554//GO:0055086//GO:0006796//GO:0008152//GO:0009108//GO:0006793//GO:0015937//GO:0022610//GO:0009165//GO:0006281//GO:0044249//GO:0046129//GO:0006164//GO:0009117//GO:0018130//GO:0006974//GO:0090304//GO:0044238//GO:0007155//GO:0019637//GO:0009150//GO:0019693//GO:0071704//GO:0009116//GO:0072522//GO:0015936//GO:0006950//GO:…	cellular metabolic process//organophosphate biosynthetic process//cellular response to stimulus//cellular nitrogen compound biosynthetic process//ribonucleoside biosynthetic process//cellular nitrogen compound metabolic process//cellular response to stress//nucleobase-containing small molecule metabolic process//phosphate-containing compound metabolic process//metabolic process//coenzyme biosynth…	GO:0005622//GO:0005634//GO:0044464//GO:0043226//GO:0043231//GO:0005575//GO:0044424//GO:0005623//GO:0043227//GO:0043229	intracellular//nucleus//cell part//organelle//intracellular membrane-bounded organelle//cellular_component//intracellular part//cell//membrane-bounded organelle//intracellular organelle	GO:0000166//GO:0001882//GO:0097159//GO:0032550//GO:0043168//GO:0032559//GO:0003684//GO:0016740//GO:0035639//GO:0032555//GO:0043167//GO:0032549//GO:0005488//GO:0004140//GO:0016773//GO:0030554//GO:0003674//GO:0032553//GO:0017076//GO:0016301//GO:0005524//GO:0003677//GO:0003676//GO:0016772//GO:0001883//GO:0003824	nucleotide binding//nucleoside binding//organic cyclic compound binding//purine ribonucleoside binding//anion binding//adenyl ribonucleotide binding//damaged DNA binding//transferase activity//purine ribonucleoside triphosphate binding//purine ribonucleotide binding//ion binding//ribonucleoside binding//binding//dephospho-CoA kinase activity//phosphotransferase activity, alcohol group as acceptor…
Csa2G011530	probable ribose-5-phosphate isomerase-like; K01807 ribose 5-phosphate isomerase A [EC:5.3.1.6]	http://www.genome.jp/dbget-bin/www_bget?csv:101221375	GO:0006740//GO:0044237//GO:0005996//GO:0046496//GO:0046365//GO:0034641//GO:0019320//GO:0055086//GO:0016052//GO:0006796//GO:0006793//GO:0008152//GO:0009056//GO:0009117//GO:0044238//GO:0019637//GO:0071704//GO:0006098//GO:0019318//GO:0006739//GO:0005975//GO:0006753//GO:0019321//GO:0019362//GO:0006007//GO:0009052//GO:0009987//GO:0006006//GO:0055114//GO:0006733//GO:0051186//GO:0044281//GO:0072524//GO:…	NADPH regeneration//cellular metabolic process//monosaccharide metabolic process//nicotinamide nucleotide metabolic process//monosaccharide catabolic process//cellular nitrogen compound metabolic process//hexose catabolic process//nucleobase-containing small molecule metabolic process//carbohydrate catabolic process//phosphate-containing compound metabolic process//phosphorus metabolic process//m…	--	--	GO:0016853//GO:0016861//GO:0003674//GO:0004751//GO:0003824//GO:0016860	isomerase activity//intramolecular oxidoreductase activity, interconverting aldoses and ketoses//molecular_function//ribose-5-phosphate isomerase activity//catalytic activity//intramolecular oxidoreductase activity
Csa2G011590	uncharacterized LOC101220430	http://www.genome.jp/dbget-bin/www_bget?csv:101220430	--	--	--	--	--	--
Csa2G021500	miraculin-like	http://www.genome.jp/dbget-bin/www_bget?csv:101213024	--	--	--	--	GO:0004857//GO:0003674//GO:0004866//GO:0061135//GO:0030234//GO:0030414//GO:0061134	enzyme inhibitor activity//molecular_function//endopeptidase inhibitor activity//endopeptidase regulator activity//enzyme regulator activity//peptidase inhibitor activity//peptidase regulator activity
Csa2G021720	uncharacterized LOC101229421	http://www.genome.jp/dbget-bin/www_bget?csv:101229421	--	--	--	--	--	--
Csa2G028490	linoleate 9S-lipoxygenase 6-like; K15718 linoleate 9S-lipoxygenase [EC:1.13.11.58]	http://www.genome.jp/dbget-bin/www_bget?csv:101206327	GO:0008152//GO:0055114//GO:0008150	metabolic process//oxidation-reduction process//biological_process	--	--	GO:0016701//GO:0016491//GO:0016702//GO:0043167//GO:0005488//GO:0051213//GO:0003674//GO:0046872//GO:0043169//GO:0003824	oxidoreductase activity, acting on single donors with incorporation of molecular oxygen//oxidoreductase activity//oxidoreductase activity, acting on single donors with incorporation of molecular oxygen, incorporation of two atoms of oxygen//ion binding//binding//dioxygenase activity//molecular_function//metal ion binding//cation binding//catalytic activity
Csa2G028500	linoleate 9S-lipoxygenase 6-like; K15718 linoleate 9S-lipoxygenase [EC:1.13.11.58]	http://www.genome.jp/dbget-bin/www_bget?csv:101206327	--	--	--	--	--	--
Csa2G033260	probable protein phosphatase 2C 73-like	http://www.genome.jp/dbget-bin/www_bget?csv:101223396	GO:0008152//GO:0044249//GO:0018130//GO:0044238//GO:0090304//GO:0044237//GO:0034645//GO:0044271//GO:0034641//GO:0009059//GO:0044260//GO:0016070//GO:0006725//GO:0008150//GO:0006139//GO:0032774//GO:0006807//GO:0019438//GO:0046483//GO:0010467//GO:0071704//GO:0006351//GO:0043170//GO:0034654//GO:0009058//GO:0009987	metabolic process//cellular biosynthetic process//heterocycle biosynthetic process//primary metabolic process//nucleic acid metabolic process//cellular metabolic process//cellular macromolecule biosynthetic process//cellular nitrogen compound biosynthetic process//cellular nitrogen compound metabolic process//macromolecule biosynthetic process//cellular macromolecule metabolic process//RNA metabo…	--	--	GO:0046983//GO:0016740//GO:0016818//GO:0004175//GO:0005488//GO:0008238//GO:0070008//GO:0016787//GO:0097159//GO:0034062//GO:0070011//GO:0008168//GO:0016462//GO:0004483//GO:0003899//GO:0016779//GO:0008174//GO:0017111//GO:0003677//GO:0008233//GO:0016817//GO:0003676//GO:0004482//GO:0016772//GO:0003824//GO:0016741//GO:0008236//GO:0003968//GO:0008757//GO:0003674//GO:0008171//GO:0004252//GO:0008173//GO:…	protein dimerization activity//transferase activity//hydrolase activity, acting on acid anhydrides, in phosphorus-containing anhydrides//endopeptidase activity//binding//exopeptidase activity//serine-type exopeptidase activity//hydrolase activity//organic cyclic compound binding//RNA polymerase activity//peptidase activity, acting on L-amino acid peptides//methyltransferase activity//pyrophosphat…
Csa2G033330	chaperone protein DnaJ-like	http://www.genome.jp/dbget-bin/www_bget?csv:101207347	GO:0009059//GO:0044237//GO:0044267//GO:0034645//GO:0044238//GO:0008152//GO:0044249//GO:0009058//GO:0006412//GO:0009987//GO:0019538//GO:0071704//GO:0043170//GO:0008150//GO:0010467//GO:0044260	macromolecule biosynthetic process//cellular metabolic process//cellular protein metabolic process//cellular macromolecule biosynthetic process//primary metabolic process//metabolic process//cellular biosynthetic process//biosynthetic process//translation//cellular process//protein metabolic process//organic substance metabolic process//macromolecule metabolic process//biological_process//gene ex…	GO:0043232//GO:0005622//GO:0019028//GO:0005840//GO:0044464//GO:0043226//GO:0005737//GO:0044423//GO:0030529//GO:0044424//GO:0005623//GO:0019012//GO:0005575//GO:0044444//GO:0032991//GO:0043229//GO:0043228	intracellular non-membrane-bounded organelle//intracellular//viral capsid//ribosome//cell part//organelle//cytoplasm//virion part//ribonucleoprotein complex//intracellular part//cell//virion//cellular_component//cytoplasmic part//macromolecular complex//intracellular organelle//non-membrane-bounded organelle	GO:0005198//GO:0005488//GO:0003735//GO:0005515//GO:0003674//GO:0031072	structural molecule activity//binding//structural constituent of ribosome//protein binding//molecular_function//heat shock protein binding
Csa2G033370	uncharacterized LOC101220295	http://www.genome.jp/dbget-bin/www_bget?csv:101220295	--	--	--	--	--	--
Csa2G034530	probable nicotianamine synthase 4-like; K05953 nicotianamine synthase [EC:2.5.1.43]	http://www.genome.jp/dbget-bin/www_bget?csv:101203651	GO:0018130//GO:0016055//GO:0072351//GO:0008152//GO:0032787//GO:0043436//GO:0044249//GO:0009308//GO:0030417//GO:0006576//GO:0006082//GO:0034641//GO:0046394//GO:0023052//GO:0050789//GO:0051716//GO:0044237//GO:0044271//GO:0042401//GO:0072330//GO:0008150//GO:0050896//GO:0007154//GO:0046483//GO:0006807//GO:0016053//GO:0019752//GO:0044281//GO:0007166//GO:0007165//GO:0072350//GO:0030418//GO:0044283//GO:…	heterocycle biosynthetic process//Wnt receptor signaling pathway//tricarboxylic acid biosynthetic process//metabolic process//monocarboxylic acid metabolic process//oxoacid metabolic process//cellular biosynthetic process//amine metabolic process//nicotianamine metabolic process//cellular biogenic amine metabolic process//organic acid metabolic process//cellular nitrogen compound metabolic proces…	GO:0016021//GO:0044425//GO:0016020//GO:0031224//GO:0005575	integral to membrane//membrane part//membrane//intrinsic to membrane//cellular_component	GO:0016765//GO:0016740//GO:0003824//GO:0003674//GO:0030410	transferase activity, transferring alkyl or aryl (other than methyl) groups//transferase activity//catalytic activity//molecular_function//nicotianamine synthase activity
Csa2G034620	transcription factor bHLH149-like	http://www.genome.jp/dbget-bin/www_bget?csv:101228000	--	--	--	--	--	--
Csa2G034770	--	--	--	--	--	--	--	--
Csa2G034790	uncharacterized LOC101221548	http://www.genome.jp/dbget-bin/www_bget?csv:101221548	GO:0065008//GO:0007165//GO:0032501//GO:0051234//GO:0043933//GO:0070271//GO:0007154//GO:0050896//GO:0051179//GO:0008150//GO:0006461//GO:0006950//GO:0042060//GO:0016043//GO:0050794//GO:0065007//GO:0009987//GO:0022610//GO:0007599//GO:0022607//GO:0050878//GO:0007596//GO:0006810//GO:0007155//GO:0071822//GO:0030168//GO:0034622//GO:0009611//GO:0050817//GO:0051258//GO:0043623//GO:0044085//GO:0051716//GO:…	regulation of biological quality//signal transduction//multicellular organismal process//establishment of localization//macromolecular complex subunit organization//protein complex biogenesis//cell communication//response to stimulus//localization//biological_process//protein complex assembly//response to stress//wound healing//cellular component organization//regulation of cellular process//biol…	GO:0005578//GO:0043228//GO:0043227//GO:0043229//GO:0044444//GO:0031012//GO:0015629//GO:0016459//GO:0032991//GO:0016020//GO:0044420//GO:0005575//GO:0005794//GO:0019012//GO:0005576//GO:0044424//GO:0005623//GO:0044430//GO:0005577//GO:0044421//GO:0043226//GO:0005737//GO:0044423//GO:0043231//GO:0043234//GO:0005604//GO:0044464//GO:0044422//GO:0005615//GO:0044446//GO:0005622//GO:0043232//GO:0019028//GO:…	proteinaceous extracellular matrix//non-membrane-bounded organelle//membrane-bounded organelle//intracellular organelle//cytoplasmic part//extracellular matrix//actin cytoskeleton//myosin complex//macromolecular complex//membrane//extracellular matrix part//cellular_component//Golgi apparatus//virion//extracellular region//intracellular part//cell//cytoskeletal part//fibrinogen complex//extracell…	GO:0060090//GO:0016817//GO:0003824//GO:0030674//GO:0003674//GO:0005515//GO:0005102//GO:0016787//GO:0005488//GO:0016818//GO:0016462//GO:0017111//GO:0003774	binding, bridging//hydrolase activity, acting on acid anhydrides//catalytic activity//protein binding, bridging//molecular_function//protein binding//receptor binding//hydrolase activity//binding//hydrolase activity, acting on acid anhydrides, in phosphorus-containing anhydrides//pyrophosphatase activity//nucleoside-triphosphatase activity//motor activity
Csa2G035330	transcription factor PIF3-like; K12126 phytochrome-interacting factor 3	http://www.genome.jp/dbget-bin/www_bget?csv:101216738	--	--	GO:0044425//GO:0016021//GO:0031224//GO:0005575//GO:0016020	membrane part//integral to membrane//intrinsic to membrane//cellular_component//membrane	GO:0016787//GO:0003674//GO:0003824	hydrolase activity//molecular_function//catalytic activity
Csa2G035380	uncharacterized LOC101224666	http://www.genome.jp/dbget-bin/www_bget?csv:101224666	GO:0044249//GO:0043436//GO:0008152//GO:0090304//GO:0044238//GO:0006418//GO:0034645//GO:0006520//GO:0044237//GO:0044267//GO:0009059//GO:0034641//GO:0006082//GO:0006399//GO:0044281//GO:0016070//GO:0044260//GO:0019752//GO:0034660//GO:0010467//GO:0046483//GO:0006807//GO:0006139//GO:0008150//GO:0006725//GO:0043170//GO:0071704//GO:0043038//GO:0043039//GO:0009987//GO:0006412//GO:0009058//GO:0019538	cellular biosynthetic process//oxoacid metabolic process//metabolic process//nucleic acid metabolic process//primary metabolic process//tRNA aminoacylation for protein translation//cellular macromolecule biosynthetic process//cellular amino acid metabolic process//cellular metabolic process//cellular protein metabolic process//macromolecule biosynthetic process//cellular nitrogen compound metabol…	GO:0005737//GO:0044464//GO:0005622//GO:0005575//GO:0044424//GO:0005623	cytoplasm//cell part//intracellular//cellular_component//intracellular part//cell	GO:0035639//GO:0032555//GO:0016876//GO:0032549//GO:0005488//GO:0043167//GO:0043168//GO:0016875//GO:0000166//GO:0032550//GO:0097159//GO:0001882//GO:0032559//GO:0004812//GO:0016874//GO:0001883//GO:0003824//GO:0017076//GO:0032553//GO:0003674//GO:0030554//GO:0005524	purine ribonucleoside triphosphate binding//purine ribonucleotide binding//ligase activity, forming aminoacyl-tRNA and related compounds//ribonucleoside binding//binding//ion binding//anion binding//ligase activity, forming carbon-oxygen bonds//nucleotide binding//purine ribonucleoside binding//organic cyclic compound binding//nucleoside binding//adenyl ribonucleotide binding//aminoacyl-tRNA liga…
Csa2G035440	probable purine permease 5-like	http://www.genome.jp/dbget-bin/www_bget?csv:101219894	GO:0009987//GO:0051179//GO:0008150//GO:0051234//GO:0055085//GO:0006810	cellular process//localization//biological_process//establishment of localization//transmembrane transport//transport	GO:0005575//GO:0016020	cellular_component//membrane	--	--
Csa2G035540	uncharacterized LOC101215299	http://www.genome.jp/dbget-bin/www_bget?csv:101215299	--	--	GO:0005575//GO:0044424//GO:0005623//GO:0043227//GO:0043229//GO:0005622//GO:0005634//GO:0044464//GO:0043226//GO:0043231	cellular_component//intracellular part//cell//membrane-bounded organelle//intracellular organelle//intracellular//nucleus//cell part//organelle//intracellular membrane-bounded organelle	GO:0003674//GO:0003677//GO:0003676//GO:0043169//GO:0046872//GO:0008270//GO:0097159//GO:0046914//GO:0043167//GO:0005488	molecular_function//DNA binding//nucleic acid binding//cation binding//metal ion binding//zinc ion binding//organic cyclic compound binding//transition metal ion binding//ion binding//binding
Csa2G036040	UPF0057 membrane protein At2g24040-like	http://www.genome.jp/dbget-bin/www_bget?csv:101231101	--	--	GO:0044425//GO:0016021//GO:0016020//GO:0031224//GO:0005575	membrane part//integral to membrane//membrane//intrinsic to membrane//cellular_component	--	--
Csa2G036610	DNA-directed RNA polymerase 3, chloroplastic-like; K10908 DNA-directed RNA polymerase, mitochondrial [EC:2.7.7.6]	http://www.genome.jp/dbget-bin/www_bget?csv:101226536	GO:0016070//GO:0044260//GO:0006807//GO:0010467//GO:0046483//GO:0019438//GO:0006725//GO:0006139//GO:0008150//GO:0032774//GO:0043170//GO:0071704//GO:0006351//GO:0034654//GO:0009058//GO:0009987//GO:0044249//GO:0008152//GO:0090304//GO:0044238//GO:0018130//GO:0044271//GO:0034645//GO:0044237//GO:0009059//GO:0034641	RNA metabolic process//cellular macromolecule metabolic process//nitrogen compound metabolic process//gene expression//heterocycle metabolic process//aromatic compound biosynthetic process//cellular aromatic compound metabolic process//nucleobase-containing compound metabolic process//biological_process//RNA biosynthetic process//macromolecule metabolic process//organic substance metabolic proces…	--	--	GO:0016772//GO:0003677//GO:0003676//GO:0003824//GO:0003674//GO:0016740//GO:0005488//GO:0097159//GO:0034062//GO:0003899//GO:0016779	transferase activity, transferring phosphorus-containing groups//DNA binding//nucleic acid binding//catalytic activity//molecular_function//transferase activity//binding//organic cyclic compound binding//RNA polymerase activity//DNA-directed RNA polymerase activity//nucleotidyltransferase activity
Csa2G036620	serine carboxypeptidase-like 29-like; K16297 serine carboxypeptidase-like clade II [EC:3.4.16.-]	http://www.genome.jp/dbget-bin/www_bget?csv:101217043	GO:0071704//GO:0043170//GO:0006508//GO:0019538//GO:0009399//GO:0008150//GO:0006807//GO:0008152//GO:0071941//GO:0044238	organic substance metabolic process//macromolecule metabolic process//proteolysis//protein metabolic process//nitrogen fixation//biological_process//nitrogen compound metabolic process//metabolic process//nitrogen cycle metabolic process//primary metabolic process	--	--	GO:0003674//GO:0017171//GO:0008233//GO:0004180//GO:0003824//GO:0008236//GO:0070011//GO:0004185//GO:0016787//GO:0008238//GO:0070008	molecular_function//serine hydrolase activity//peptidase activity//carboxypeptidase activity//catalytic activity//serine-type peptidase activity//peptidase activity, acting on L-amino acid peptides//serine-type carboxypeptidase activity//hydrolase activity//exopeptidase activity//serine-type exopeptidase activity
Csa2G037230	UDP-glucuronate 4-epimerase 1-like; K08679 UDP-glucuronate 4-epimerase [EC:5.1.3.6]	http://www.genome.jp/dbget-bin/www_bget?csv:101214888	GO:0044249//GO:0008152//GO:0044264//GO:0045226//GO:0044238//GO:0034645//GO:0044237//GO:0006629//GO:0009059//GO:0046379//GO:0016051//GO:0044260//GO:0033692//GO:0055114//GO:0000271//GO:0034637//GO:0008150//GO:0008202//GO:0006694//GO:0043170//GO:0005975//GO:0005976//GO:0044262//GO:0071704//GO:0008610//GO:0009987//GO:0009058	cellular biosynthetic process//metabolic process//cellular polysaccharide metabolic process//extracellular polysaccharide biosynthetic process//primary metabolic process//cellular macromolecule biosynthetic process//cellular metabolic process//lipid metabolic process//macromolecule biosynthetic process//extracellular polysaccharide metabolic process//carbohydrate biosynthetic process//cellular ma…	--	--	GO:0016740//GO:0016491//GO:0008831//GO:0005488//GO:0008168//GO:0003854//GO:0033764//GO:0016614//GO:0003824//GO:0016741//GO:0016229//GO:0003674//GO:0048037//GO:0016616//GO:0050662	transferase activity//oxidoreductase activity//dTDP-4-dehydrorhamnose reductase activity//binding//methyltransferase activity//3-beta-hydroxy-delta5-steroid dehydrogenase activity//steroid dehydrogenase activity, acting on the CH-OH group of donors, NAD or NADP as acceptor//oxidoreductase activity, acting on CH-OH group of donors//catalytic activity//transferase activity, transferring one-carbon …
Csa2G048330	4-coumarate--CoA ligase 1-like; K01904 4-coumarate--CoA ligase [EC:6.2.1.12]	http://www.genome.jp/dbget-bin/www_bget?csv:101210868	GO:0008152//GO:0008150	metabolic process//biological_process	--	--	GO:0003824//GO:0003674	catalytic activity//molecular_function
Csa2G049960	xylose isomerase-like; K01805 xylose isomerase [EC:5.3.1.5]	http://www.genome.jp/dbget-bin/www_bget?csv:101209640	GO:0008150//GO:0071704//GO:0044238//GO:0008152//GO:0009056//GO:0016042//GO:0006629	biological_process//organic substance metabolic process//primary metabolic process//metabolic process//catabolic process//lipid catabolic process//lipid metabolic process	GO:0005576//GO:0005575	extracellular region//cellular_component	GO:0043169//GO:0005509//GO:0016788//GO:0003824//GO:0046872//GO:0004623//GO:0052689//GO:0005515//GO:0003674//GO:0005488//GO:0043167//GO:0016787//GO:0016298//GO:0004620	cation binding//calcium ion binding//hydrolase activity, acting on ester bonds//catalytic activity//metal ion binding//phospholipase A2 activity//carboxylic ester hydrolase activity//protein binding//molecular_function//binding//ion binding//hydrolase activity//lipase activity//phospholipase activity
Csa2G057070	(R)-mandelonitrile lyase 1-like; K08248 mandelonitrile lyase [EC:4.1.2.10]	http://www.genome.jp/dbget-bin/www_bget?csv:101218493	GO:0065007//GO:0009987//GO:0031323//GO:0016117//GO:0009058//GO:0019538//GO:0008610//GO:0016573//GO:0034654//GO:2000112//GO:0006355//GO:0050794//GO:0006475//GO:0016043//GO:0043170//GO:0006351//GO:0051171//GO:0071704//GO:0018393//GO:0046483//GO:0019438//GO:0010467//GO:0016568//GO:0006807//GO:0016108//GO:0044255//GO:0019222//GO:0006721//GO:0032774//GO:0019219//GO:0008150//GO:0006139//GO:0006725//GO:…	biological regulation//cellular process//regulation of cellular metabolic process//carotenoid biosynthetic process//biosynthetic process//protein metabolic process//lipid biosynthetic process//histone acetylation//nucleobase-containing compound biosynthetic process//regulation of cellular macromolecule biosynthetic process//regulation of transcription, DNA-dependent//regulation of cellular proces…	GO:0031974//GO:0044424//GO:0005623//GO:0044451//GO:0005575//GO:0000123//GO:0043227//GO:0043229//GO:0032991//GO:0005634//GO:0044422//GO:0044446//GO:0005622//GO:0043233//GO:0043226//GO:0031981//GO:0043231//GO:0043234//GO:0044464//GO:0005654//GO:0070013//GO:0044428	membrane-enclosed lumen//intracellular part//cell//nucleoplasm part//cellular_component//histone acetyltransferase complex//membrane-bounded organelle//intracellular organelle//macromolecular complex//nucleus//organelle part//intracellular organelle part//intracellular//organelle lumen//organelle//nuclear lumen//intracellular membrane-bounded organelle//protein complex//cell part//nucleoplasm//in…	GO:0050662//GO:0016747//GO:0003713//GO:0016407//GO:0050660//GO:0003674//GO:0048037//GO:0003712//GO:0016705//GO:0003824//GO:0016410//GO:0016614//GO:0016746//GO:0043168//GO:0000166//GO:0097159//GO:0016491//GO:0000988//GO:0004402//GO:0005488//GO:0043167//GO:0008080//GO:0000989//GO:0016740	coenzyme binding//transferase activity, transferring acyl groups other than amino-acyl groups//transcription coactivator activity//acetyltransferase activity//flavin adenine dinucleotide binding//molecular_function//cofactor binding//transcription cofactor activity//oxidoreductase activity, acting on paired donors, with incorporation or reduction of molecular oxygen//catalytic activity//N-acyltra…
Csa2G057080	zinc finger protein CONSTANS-LIKE 5-like	http://www.genome.jp/dbget-bin/www_bget?csv:101217538	--	--	GO:0044464//GO:0005622//GO:0005623//GO:0005575	cell part//intracellular//cell//cellular_component	GO:0043167//GO:0005488//GO:0046914//GO:0008270//GO:0046872//GO:0043169//GO:0005515//GO:0003674	ion binding//binding//transition metal ion binding//zinc ion binding//metal ion binding//cation binding//protein binding//molecular_function
Csa2G058620	uncharacterized LOC101224265	http://www.genome.jp/dbget-bin/www_bget?csv:101224265	--	--	--	--	GO:0005515//GO:0051536//GO:0003674//GO:0031072//GO:0009055//GO:0051540//GO:0005488	protein binding//iron-sulfur cluster binding//molecular_function//heat shock protein binding//electron carrier activity//metal cluster binding//binding
Csa2G058690	uncharacterized LOC101213145	http://www.genome.jp/dbget-bin/www_bget?csv:101213145	GO:0034613//GO:0065007//GO:0009987//GO:0051649//GO:0019060//GO:0035821//GO:0070727//GO:0016192//GO:0051179//GO:0048878//GO:0008150//GO:0071702//GO:0051701//GO:0016032//GO:0065008//GO:0006886//GO:0044419//GO:0051234//GO:0015031//GO:0051704//GO:0044403//GO:0046719//GO:0051641//GO:0051708//GO:0030581//GO:0042592//GO:0046907//GO:0019048//GO:0044003//GO:0008104//GO:0051817//GO:0048193//GO:0033036//GO:…	cellular protein localization//biological regulation//cellular process//establishment of localization in cell//intracellular transport of viral proteins in host cell//modification of morphology or physiology of other organism//cellular macromolecule localization//vesicle-mediated transport//localization//chemical homeostasis//biological_process//organic substance transport//interaction with host/…	GO:0005575//GO:0016020	cellular_component//membrane	GO:0003674//GO:0001071//GO:0003700	molecular_function//nucleic acid binding transcription factor activity//sequence-specific DNA binding transcription factor activity
Csa2G059720	NADPH--cytochrome P450 reductase-like; K00327 NADPH-ferrihemoprotein reductase [EC:1.6.2.4]	http://www.genome.jp/dbget-bin/www_bget?csv:101223212	GO:0055114//GO:0008150//GO:0008152	oxidation-reduction process//biological_process//metabolic process	--	--	GO:0048037//GO:0032553//GO:0003674//GO:0051536//GO:0050662//GO:0051537//GO:0003824//GO:0010181//GO:0000166//GO:0097159//GO:0043168//GO:0043167//GO:0051540//GO:0005488//GO:0016491	cofactor binding//ribonucleotide binding//molecular_function//iron-sulfur cluster binding//coenzyme binding//2 iron, 2 sulfur cluster binding//catalytic activity//FMN binding//nucleotide binding//organic cyclic compound binding//anion binding//ion binding//metal cluster binding//binding//oxidoreductase activity
Csa2G060360	uncharacterized LOC101221328	http://www.genome.jp/dbget-bin/www_bget?csv:101221328	--	--	--	--	--	--
Csa2G068680	uncharacterized LOC101205542	http://www.genome.jp/dbget-bin/www_bget?csv:101205542	GO:0065007//GO:0009987//GO:0009719//GO:0031323//GO:0009058//GO:2000112//GO:0034654//GO:0006355//GO:0050794//GO:0043170//GO:0006351//GO:0051171//GO:0071704//GO:0046483//GO:0019438//GO:0010033//GO:0010467//GO:0006807//GO:0019222//GO:0050896//GO:0032774//GO:0019219//GO:0008150//GO:0006139//GO:0051252//GO:0006725//GO:0016070//GO:0044260//GO:0009725//GO:0009059//GO:0034641//GO:0009889//GO:0034645//GO:…	biological regulation//cellular process//response to endogenous stimulus//regulation of cellular metabolic process//biosynthetic process//regulation of cellular macromolecule biosynthetic process//nucleobase-containing compound biosynthetic process//regulation of transcription, DNA-dependent//regulation of cellular process//macromolecule metabolic process//transcription, DNA-dependent//regulation…	GO:0044424//GO:0005623//GO:0005575//GO:0043227//GO:0043229//GO:0005634//GO:0005622//GO:0043226//GO:0043231//GO:0044464	intracellular part//cell//cellular_component//membrane-bounded organelle//intracellular organelle//nucleus//intracellular//organelle//intracellular membrane-bounded organelle//cell part	GO:0005515//GO:0003674//GO:0003676//GO:0003677//GO:0097159//GO:0005488	protein binding//molecular_function//nucleic acid binding//DNA binding//organic cyclic compound binding//binding
Csa2G070240	pentatricopeptide repeat-containing protein At3g42630-like	http://www.genome.jp/dbget-bin/www_bget?csv:101204504	--	--	--	--	--	--
Csa2G070890	glycine--tRNA ligase 1, mitochondrial-like; K01880 glycyl-tRNA synthetase [EC:6.1.1.14]	http://www.genome.jp/dbget-bin/www_bget?csv:101213236	GO:0071704//GO:0043170//GO:0019538//GO:0006412//GO:0009987//GO:0043039//GO:0009058//GO:0043038//GO:0034660//GO:0019752//GO:0016070//GO:0044260//GO:0044281//GO:0006399//GO:0008150//GO:0006139//GO:0006725//GO:0046483//GO:0010467//GO:0006807//GO:0044267//GO:0044237//GO:0006520//GO:0006418//GO:0034645//GO:0006082//GO:0034641//GO:0009059//GO:0008152//GO:0043436//GO:0044249//GO:0044238//GO:0090304	organic substance metabolic process//macromolecule metabolic process//protein metabolic process//translation//cellular process//tRNA aminoacylation//biosynthetic process//amino acid activation//ncRNA metabolic process//carboxylic acid metabolic process//RNA metabolic process//cellular macromolecule metabolic process//small molecule metabolic process//tRNA metabolic process//biological_process//nu…	GO:0005575//GO:0005623//GO:0044424//GO:0005622//GO:0044464//GO:0005737	cellular_component//cell//intracellular part//intracellular//cell part//cytoplasm	GO:0032553//GO:0003674//GO:0030554//GO:0017076//GO:0005524//GO:0016817//GO:0016874//GO:0003824//GO:0001883//GO:0032550//GO:0001882//GO:0097159//GO:0000166//GO:0043168//GO:0016875//GO:0004812//GO:0032559//GO:0016876//GO:0035639//GO:0032555//GO:0005488//GO:0032549//GO:0043167//GO:0016787	ribonucleotide binding//molecular_function//adenyl nucleotide binding//purine nucleotide binding//ATP binding//hydrolase activity, acting on acid anhydrides//ligase activity//catalytic activity//purine nucleoside binding//purine ribonucleoside binding//nucleoside binding//organic cyclic compound binding//nucleotide binding//anion binding//ligase activity, forming carbon-oxygen bonds//aminoacyl-tR…
Csa2G074080	monothiol glutaredoxin-S14, chloroplastic-like; K07390 monothiol glutaredoxin	http://www.genome.jp/dbget-bin/www_bget?csv:101210806	GO:0045454//GO:0042592//GO:0050789//GO:0008150//GO:0065008//GO:0019725//GO:0009987//GO:0065007//GO:0050794	cell redox homeostasis//homeostatic process//regulation of biological process//biological_process//regulation of biological quality//cellular homeostasis//cellular process//biological regulation//regulation of cellular process	--	--	GO:0016491//GO:0016667//GO:0015036//GO:0003824//GO:0015035//GO:0009055//GO:0003674	oxidoreductase activity//oxidoreductase activity, acting on a sulfur group of donors//disulfide oxidoreductase activity//catalytic activity//protein disulfide oxidoreductase activity//electron carrier activity//molecular_function
Csa2G074170	putative auxin efflux carrier component 8-like; K13947 auxin efflux carrier family	http://www.genome.jp/dbget-bin/www_bget?csv:101209818	GO:0051179//GO:0008150//GO:0051234//GO:0009987//GO:0006810//GO:0055085	localization//biological_process//establishment of localization//cellular process//transport//transmembrane transport	GO:0016020//GO:0005575//GO:0031224//GO:0016021//GO:0044425	membrane//cellular_component//intrinsic to membrane//integral to membrane//membrane part	--	--
Csa2G079100	ammonium transporter 1 member 2-like; K03320 ammonium transporter, Amt family	http://www.genome.jp/dbget-bin/www_bget?csv:101217871	--	--	--	--	--	--
Csa2G079120	ammonium transporter 1 member 2-like; K03320 ammonium transporter, Amt family	http://www.genome.jp/dbget-bin/www_bget?csv:101217871	--	--	--	--	--	--
Csa2G082200	uncharacterized LOC101218053	http://www.genome.jp/dbget-bin/www_bget?csv:101218053	--	--	--	--	--	--
Csa2G120940	cytokinin hydroxylase-like	http://www.genome.jp/dbget-bin/www_bget?csv:101208211	GO:0055114//GO:0008150//GO:0008152	oxidation-reduction process//biological_process//metabolic process	--	--	GO:0009055//GO:0043169//GO:0003824//GO:0046906//GO:0046872//GO:0016705//GO:0003674//GO:0043167//GO:0005488//GO:0016491//GO:0020037//GO:0097159//GO:0005506//GO:0046914	electron carrier activity//cation binding//catalytic activity//tetrapyrrole binding//metal ion binding//oxidoreductase activity, acting on paired donors, with incorporation or reduction of molecular oxygen//molecular_function//ion binding//binding//oxidoreductase activity//heme binding//organic cyclic compound binding//iron ion binding//transition metal ion binding
Csa2G122020	uncharacterized LOC101209678	http://www.genome.jp/dbget-bin/www_bget?csv:101209678	GO:0019067//GO:0019072//GO:0044237//GO:0019073//GO:0044085//GO:0071840//GO:0051704//GO:0044403//GO:0034641//GO:0071103//GO:0022607//GO:0008152//GO:0044238//GO:0090304//GO:0048610//GO:0016043//GO:0043170//GO:0000003//GO:0071704//GO:0009987//GO:0044260//GO:0006259//GO:0019068//GO:0016032//GO:0019058//GO:0044419//GO:0006323//GO:0046483//GO:0006807//GO:0008150//GO:0006139//GO:0006725	viral assembly, maturation, egress, and release//viral genome packaging//cellular metabolic process//viral DNA genome packaging//cellular component biogenesis//cellular component organization or biogenesis//multi-organism process//symbiosis, encompassing mutualism through parasitism//cellular nitrogen compound metabolic process//DNA conformation change//cellular component assembly//metabolic proc…	--	--	--	--
Csa2G123610	--	--	--	--	--	--	--	--
Csa2G129160	uncharacterized LOC101225853; K08869 aarF domain-containing kinase	http://www.genome.jp/dbget-bin/www_bget?csv:101225853	GO:0009987//GO:0019538//GO:0071704//GO:0043170//GO:0008150//GO:0044260//GO:0016310//GO:0044237//GO:0044267//GO:0006464//GO:0043412//GO:0044238//GO:0006796//GO:0008152//GO:0006793//GO:0006468	cellular process//protein metabolic process//organic substance metabolic process//macromolecule metabolic process//biological_process//cellular macromolecule metabolic process//phosphorylation//cellular metabolic process//cellular protein metabolic process//protein modification process//macromolecule modification//primary metabolic process//phosphate-containing compound metabolic process//metabol…	--	--	GO:0005524//GO:0003674//GO:0030554//GO:0032553//GO:0016301//GO:0017076//GO:0001883//GO:0003824//GO:0016772//GO:0004672//GO:0032559//GO:0000166//GO:0032550//GO:0097159//GO:0001882//GO:0043168//GO:0032549//GO:0005488//GO:0043167//GO:0016773//GO:0016740//GO:0035639//GO:0032555	ATP binding//molecular_function//adenyl nucleotide binding//ribonucleotide binding//kinase activity//purine nucleotide binding//purine nucleoside binding//catalytic activity//transferase activity, transferring phosphorus-containing groups//protein kinase activity//adenyl ribonucleotide binding//nucleotide binding//purine ribonucleoside binding//organic cyclic compound binding//nucleoside binding/…
Csa2G129170	putative vesicle-associated membrane protein 726-like; K08511 vesicle-associated membrane protein 72	http://www.genome.jp/dbget-bin/www_bget?csv:101212780	GO:0006810//GO:0051234//GO:0008150//GO:0051179//GO:0016192	transport//establishment of localization//biological_process//localization//vesicle-mediated transport	GO:0044425//GO:0016021//GO:0016020//GO:0031224//GO:0005575	membrane part//integral to membrane//membrane//intrinsic to membrane//cellular_component	GO:0016787//GO:0016817//GO:0003824//GO:0003674	hydrolase activity//hydrolase activity, acting on acid anhydrides//catalytic activity//molecular_function
Csa2G130670	non-lysosomal glucosylceramidase-like; K17108 non-lysosomal glucosylceramidase [EC:3.2.1.45]	http://www.genome.jp/dbget-bin/www_bget?csv:101228154	GO:0006665//GO:0008152//GO:0044238//GO:0006643//GO:0044237//GO:0006629//GO:0044255//GO:0006807//GO:0008150//GO:0071704//GO:0009987	sphingolipid metabolic process//metabolic process//primary metabolic process//membrane lipid metabolic process//cellular metabolic process//lipid metabolic process//cellular lipid metabolic process//nitrogen compound metabolic process//biological_process//organic substance metabolic process//cellular process	GO:0044425//GO:0016021//GO:0016020//GO:0005575//GO:0031224	membrane part//integral to membrane//membrane//cellular_component//intrinsic to membrane	GO:0016787//GO:0016798//GO:0004553//GO:0004348//GO:0003824//GO:0003674	hydrolase activity//hydrolase activity, acting on glycosyl bonds//hydrolase activity, hydrolyzing O-glycosyl compounds//glucosylceramidase activity//catalytic activity//molecular_function
Csa2G139850	pentatricopeptide repeat-containing protein At1g04840-like	http://www.genome.jp/dbget-bin/www_bget?csv:101206850	GO:0010468//GO:0010556//GO:0031326//GO:0060255//GO:0018130//GO:2001141//GO:0044238//GO:0090304//GO:0008152//GO:0080090//GO:0044249//GO:0034641//GO:0009889//GO:0009059//GO:0044237//GO:0050789//GO:0044271//GO:0034645//GO:0019219//GO:0032774//GO:0051252//GO:0006725//GO:0006139//GO:0008150//GO:0006807//GO:0010467//GO:0019438//GO:0046483//GO:0019222//GO:0044260//GO:0016070//GO:0009058//GO:0031323//GO:…	regulation of gene expression//regulation of macromolecule biosynthetic process//regulation of cellular biosynthetic process//regulation of macromolecule metabolic process//heterocycle biosynthetic process//regulation of RNA biosynthetic process//primary metabolic process//nucleic acid metabolic process//metabolic process//regulation of primary metabolic process//cellular biosynthetic process//ce…	GO:0044464//GO:0043226//GO:0043231//GO:0005622//GO:0043227//GO:0043229//GO:0044424//GO:0005623//GO:0005575	cell part//organelle//intracellular membrane-bounded organelle//intracellular//membrane-bounded organelle//intracellular organelle//intracellular part//cell//cellular_component	GO:0051540//GO:0005488//GO:0097159//GO:0003677//GO:0003676//GO:0042802//GO:0005515//GO:0051537//GO:0003674//GO:0051536	metal cluster binding//binding//organic cyclic compound binding//DNA binding//nucleic acid binding//identical protein binding//protein binding//2 iron, 2 sulfur cluster binding//molecular_function//iron-sulfur cluster binding
Csa2G139860	cytochrome P450 734A1-like	http://www.genome.jp/dbget-bin/www_bget?csv:101207088	GO:0055114//GO:0008150//GO:0008152	oxidation-reduction process//biological_process//metabolic process	--	--	GO:0009055//GO:0046906//GO:0016705//GO:0046872//GO:0043169//GO:0003824//GO:0003674//GO:0016491//GO:0020037//GO:0043167//GO:0005488//GO:0005506//GO:0097159//GO:0046914	electron carrier activity//tetrapyrrole binding//oxidoreductase activity, acting on paired donors, with incorporation or reduction of molecular oxygen//metal ion binding//cation binding//catalytic activity//molecular_function//oxidoreductase activity//heme binding//ion binding//binding//iron ion binding//organic cyclic compound binding//transition metal ion binding
Csa2G146400	UDP-glucuronate 4-epimerase 6-like; K08679 UDP-glucuronate 4-epimerase [EC:5.1.3.6]	http://www.genome.jp/dbget-bin/www_bget?csv:101216154	GO:0008610//GO:0009987//GO:0009058//GO:0006694//GO:0043170//GO:0005975//GO:0005976//GO:0044262//GO:0071704//GO:0034637//GO:0008150//GO:0008202//GO:0044260//GO:0033692//GO:0055114//GO:0000271//GO:0006629//GO:0009059//GO:0046379//GO:0016051//GO:0034645//GO:0044237//GO:0044238//GO:0045226//GO:0044249//GO:0008152//GO:0044264	lipid biosynthetic process//cellular process//biosynthetic process//steroid biosynthetic process//macromolecule metabolic process//carbohydrate metabolic process//polysaccharide metabolic process//cellular carbohydrate metabolic process//organic substance metabolic process//cellular carbohydrate biosynthetic process//biological_process//steroid metabolic process//cellular macromolecule metabolic …	--	--	GO:0016616//GO:0050662//GO:0016229//GO:0003674//GO:0048037//GO:0003824//GO:0016741//GO:0016614//GO:0033764//GO:0008168//GO:0003854//GO:0016491//GO:0008831//GO:0005488//GO:0016740	oxidoreductase activity, acting on the CH-OH group of donors, NAD or NADP as acceptor//coenzyme binding//steroid dehydrogenase activity//molecular_function//cofactor binding//catalytic activity//transferase activity, transferring one-carbon groups//oxidoreductase activity, acting on CH-OH group of donors//steroid dehydrogenase activity, acting on the CH-OH group of donors, NAD or NADP as acceptor…
Csa2G147920	shikimate O-hydroxycinnamoyltransferase-like	http://www.genome.jp/dbget-bin/www_bget?csv:101208064	--	--	--	--	GO:0003824//GO:0016747//GO:0003674//GO:0016740//GO:0016746	catalytic activity//transferase activity, transferring acyl groups other than amino-acyl groups//molecular_function//transferase activity//transferase activity, transferring acyl groups
Csa2G167190	beta-amylase 1, chloroplastic-like; K01177 beta-amylase [EC:3.2.1.2]	http://www.genome.jp/dbget-bin/www_bget?csv:101216744	GO:0044238//GO:0009056//GO:0008152//GO:0016052//GO:0043170//GO:0005975//GO:0005976//GO:0071704//GO:0008150//GO:0009057//GO:0000272	primary metabolic process//catabolic process//metabolic process//carbohydrate catabolic process//macromolecule metabolic process//carbohydrate metabolic process//polysaccharide metabolic process//organic substance metabolic process//biological_process//macromolecule catabolic process//polysaccharide catabolic process	GO:0043234//GO:0005575//GO:0032991//GO:0016020//GO:0009341	protein complex//cellular_component//macromolecular complex//membrane//beta-galactosidase complex	GO:0016798//GO:0015925//GO:0016787//GO:0004091//GO:0016161//GO:0052689//GO:0003674//GO:0004565//GO:0003824//GO:0016788//GO:0004553//GO:0016160	hydrolase activity, acting on glycosyl bonds//galactosidase activity//hydrolase activity//carboxylesterase activity//beta-amylase activity//carboxylic ester hydrolase activity//molecular_function//beta-galactosidase activity//catalytic activity//hydrolase activity, acting on ester bonds//hydrolase activity, hydrolyzing O-glycosyl compounds//amylase activity
Csa2G171900	PGR5; protein PROTON GRADIENT REGULATION 5, chloroplastic-like	http://www.genome.jp/dbget-bin/www_bget?csv:101208738	--	--	--	--	--	--
Csa2G176190	uncharacterized LOC101203749	http://www.genome.jp/dbget-bin/www_bget?csv:101203749	--	--	--	--	GO:0043167//GO:0005488//GO:0003674//GO:0046872//GO:0043169	ion binding//binding//molecular_function//metal ion binding//cation binding
Csa2G176700	uncharacterized LOC101211209	http://www.genome.jp/dbget-bin/www_bget?csv:101211209	--	--	--	--	--	--
Csa2G179230	CASP-like protein At3g23200-like	http://www.genome.jp/dbget-bin/www_bget?csv:101226466	GO:0009058//GO:0008150//GO:0008152	biosynthetic process//biological_process//metabolic process	--	--	--	--
Csa2G179730	1-aminocyclopropane-1-carboxylate oxidase homolog 6-like	http://www.genome.jp/dbget-bin/www_bget?csv:101226685	GO:0008152//GO:0055114//GO:0008150	metabolic process//oxidation-reduction process//biological_process	--	--	GO:0016491//GO:0051213//GO:0003674//GO:0016706//GO:0016705//GO:0003824	oxidoreductase activity//dioxygenase activity//molecular_function//oxidoreductase activity, acting on paired donors, with incorporation or reduction of molecular oxygen, 2-oxoglutarate as one donor, and incorporation of one atom each of oxygen into both donors//oxidoreductase activity, acting on paired donors, with incorporation or reduction of molecular oxygen//catalytic activity
Csa2G185730	uncharacterized LOC101226909	http://www.genome.jp/dbget-bin/www_bget?csv:101226909	--	--	--	--	--	--
Csa2G190750	uncharacterized LOC101220789	http://www.genome.jp/dbget-bin/www_bget?csv:101220789	GO:0051716//GO:0050789//GO:0023052//GO:0007165//GO:0007154//GO:0050896//GO:0008150//GO:0050794//GO:0065007//GO:0009987	cellular response to stimulus//regulation of biological process//signaling//signal transduction//cell communication//response to stimulus//biological_process//regulation of cellular process//biological regulation//cellular process	GO:0005575//GO:0005576	cellular_component//extracellular region	GO:0005102//GO:0005488//GO:0005198//GO:0005179//GO:0042302//GO:0003674//GO:0005515	receptor binding//binding//structural molecule activity//hormone activity//structural constituent of cuticle//molecular_function//protein binding
Csa2G200440	auxin-induced protein 22B-like; K14484 auxin-responsive protein IAA	http://www.genome.jp/dbget-bin/www_bget?csv:101229704	GO:0065007//GO:0034654//GO:2000112//GO:0009987//GO:0009058//GO:0031323//GO:0050794//GO:0043170//GO:0006355//GO:0006351//GO:0051171//GO:0071704//GO:0019222//GO:0010467//GO:0046483//GO:0019438//GO:0006807//GO:0006139//GO:0008150//GO:0006725//GO:0051252//GO:0032774//GO:0019219//GO:0016070//GO:0044260//GO:0009059//GO:0009889//GO:0034641//GO:0044271//GO:0034645//GO:0050789//GO:0044237//GO:0044238//GO:…	biological regulation//nucleobase-containing compound biosynthetic process//regulation of cellular macromolecule biosynthetic process//cellular process//biosynthetic process//regulation of cellular metabolic process//regulation of cellular process//macromolecule metabolic process//regulation of transcription, DNA-dependent//transcription, DNA-dependent//regulation of nitrogen compound metabolic p…	GO:0005623//GO:0044424//GO:0005575//GO:0043229//GO:0043227//GO:0005634//GO:0005622//GO:0043231//GO:0043226//GO:0044464	cell//intracellular part//cellular_component//intracellular organelle//membrane-bounded organelle//nucleus//intracellular//intracellular membrane-bounded organelle//organelle//cell part	--	--
Csa2G213950	--	--	--	--	--	--	--	--
[truncated: 1,665 more rows]

## Sheet: Phy vsCon_PhyxChrvsCon.venn.xls
Gene ID	KEGG Description	KEGG url	Biological Process	Biological Process Description	Cellular Component	Cellular Component Description	Molecular Function	Molecular Function Description
Csa1G161590	uncharacterized LOC101224731	http://www.genome.jp/dbget-bin/www_bget?csv:101224731	--	--	--	--	--	--
Csa1G435790	protein TIFY 5A-like	http://www.genome.jp/dbget-bin/www_bget?csv:101203759	--	--	--	--	GO:0003674//GO:0005515//GO:0005488	molecular_function//protein binding//binding
[truncated: 22 more rows]

## Sheet: ChrvsCon_PhyvsCon.venn.xls
Csa1G042700	beta-glucosidase 44-like; K05350 beta-glucosidase [EC:3.2.1.21]	http://www.genome.jp/dbget-bin/www_bget?csv:101218046	GO:0071704//GO:0005975//GO:0008152//GO:0008150//GO:0044238	organic substance metabolic process//carbohydrate metabolic process//metabolic process//biological_process//primary metabolic process	--	--	GO:0097159//GO:0003674//GO:0016798//GO:0005515//GO:0003677//GO:0046983//GO:0003676//GO:0004553//GO:0003824//GO:0005488//GO:0016787	organic cyclic compound binding//molecular_function//hydrolase activity, acting on glycosyl bonds//protein binding//DNA binding//protein dimerization activity//nucleic acid binding//hydrolase activity, hydrolyzing O-glycosyl compounds//catalytic activity//binding//hydrolase activity
[truncated: 2 more rows]

[truncated: 2 more sheets: Chr vs Con_PhyxChr vs Con, Chr vs Con_PhyvsCon_PhyxChrvCon]
