# Supplementary material for: Transcriptomic analysis reveals distinct resistant response by physcion and chrysophanol against cucumber powdery mildew
Source: PeerJ. 2016 May 17;4:e1991. doi: 10.7717/peerj.1991 (PMC4878370; doi:10.7717/peerj.1991)
Supplement: Table S7 [file peerj-04-1991-s010.xlsx]

## Sheet: list
			Supplementary Table 7 Kyoto Encyclopedia of Genes and Genomes (KEGG) pathway enrichment list of DEGs

## Sheet: Chr vs ConD EG_KEGG_pat
##Databases: KEGG PATHWAY
##Statistical test method: hypergeometric test / Fisher's exact test
##FDR correction method: Benjamini and Hochberg
#Term	Database	ID	Input number	Background number	P-Value	Corrected P-Value	Input	KEGG_ID/KO	Entrez_ID	Hyperlink
Glutathione metabolism	KEGG PATHWAY	csv00480	2	104	0.0184644	0.232288	Csa3G133380|Csa4G303680	csv:101227857|csv:101231986|	101227857|101231986|	http://www.genome.jp/kegg-bin/show_pathway?csv00480/csv:101231986%09red/csv:101227857%09red
Vitamin B6 metabolism	KEGG PATHWAY	csv00750	1	17	0.0350407	0.232288	Csa7G451920	csv:101227725|	101227725|	http://www.genome.jp/kegg-bin/show_pathway?csv00750/csv:101227725%09red
Plant-pathogen interaction	KEGG PATHWAY	csv04626	2	181	0.0503733	0.232288	Csa3G576840|Novel00536	csv:101214911|csv:101212539|	101214911|101212539|	http://www.genome.jp/kegg-bin/show_pathway?csv04626/csv:101214911%09red/csv:101212539%09red
Phenylpropanoid biosynthesis	KEGG PATHWAY	csv00940	2	214	0.0675245	0.232288	Csa1G042700|Csa6G213910	csv:101218046|csv:101227020|	101218046|101227020|	http://www.genome.jp/kegg-bin/show_pathway?csv00940/csv:101227020%09red/csv:101218046%09red
Ether lipid metabolism	KEGG PATHWAY	csv00565	1	37	0.07259	0.232288	Csa2G032750	csv:101220522|	101220522|	http://www.genome.jp/kegg-bin/show_pathway?csv00565/csv:101220522%09red
Nitrogen metabolism	KEGG PATHWAY	csv00910	1	45	0.0872128	0.232568	Csa5G599860	csv:101212365|	101212365|	http://www.genome.jp/kegg-bin/show_pathway?csv00910/csv:101212365%09red
Glycerolipid metabolism	KEGG PATHWAY	csv00561	1	68	0.128029	0.292638	Csa2G008110	csv:101215352|	101215352|	http://www.genome.jp/kegg-bin/show_pathway?csv00561/csv:101215352%09red
Cyanoamino acid metabolism	KEGG PATHWAY	csv00460	1	80	0.148622	0.297244	Csa1G042700	csv:101218046|	101218046|	http://www.genome.jp/kegg-bin/show_pathway?csv00460/csv:101218046%09red
Glycerophospholipid metabolism	KEGG PATHWAY	csv00564	1	110	0.198079	0.35214	Csa2G032750	csv:101220522|	101220522|	http://www.genome.jp/kegg-bin/show_pathway?csv00564/csv:101220522%09red
Endocytosis	KEGG PATHWAY	csv04144	1	149	0.258256	0.377474	Csa2G032750	csv:101220522|	101220522|	http://www.genome.jp/kegg-bin/show_pathway?csv04144/csv:101220522%09red
Glycolysis / Gluconeogenesis	KEGG PATHWAY	csv00010	1	157	0.270051	0.377474	Csa4G312240	csv:101217534|	101217534|	http://www.genome.jp/kegg-bin/show_pathway?csv00010/csv:101217534%09red
Phenylalanine metabolism	KEGG PATHWAY	csv00360	1	166	0.283106	0.377474	Csa6G213910	csv:101227020|	101227020|	http://www.genome.jp/kegg-bin/show_pathway?csv00360/csv:101227020%09red
Metabolic pathways	KEGG PATHWAY	csv01100	6	2496	0.37357	0.459779	Csa6G213910|Csa2G032750|Csa4G312240|Csa1G042700|Csa2G008110|Csa7G451920	csv:101227020|csv:101220522|csv:101217534|csv:101218046|csv:101215352|csv:101227725|	101227020|101220522|101217534|101218046|101215352|101227725|	http://www.genome.jp/kegg-bin/show_pathway?csv01100/csv:101227020%09red/csv:101215352%09red/csv:101218046%09red/csv:101220522%09red/csv:101217534%09red/csv:101227725%09red
Starch and sucrose metabolism	KEGG PATHWAY	csv00500	1	275	0.424423	0.480568	Csa1G042700	csv:101218046|	101218046|	http://www.genome.jp/kegg-bin/show_pathway?csv00500/csv:101218046%09red
Biosynthesis of secondary metabolites	KEGG PATHWAY	csv01110	3	1238	0.450533	0.480568	Csa1G042700|Csa6G213910|Csa4G312240	csv:101218046|csv:101227020|csv:101217534|	101218046|101227020|101217534|	http://www.genome.jp/kegg-bin/show_pathway?csv01110/csv:101217534%09red/csv:101227020%09red/csv:101218046%09red
Plant hormone signal transduction	KEGG PATHWAY	csv04075	1	366	0.521506	0.521506	Novel00536	csv:101212539|	101212539|	http://www.genome.jp/kegg-bin/show_pathway?csv04075/csv:101212539%09red
--------------------
#Term	Database	ID	Input number	Background number	P-Value	Corrected P-Value	Input	KEGG_ID/KO	Entrez_ID	Hyperlink
--------------------
#Term	Database	ID	Input number	Background number	P-Value	Corrected P-Value	Input	KEGG_ID/KO	Entrez_ID	Hyperlink
--------------------

## Sheet: Phy vsCon DEG_KEGG_pat
##Databases: KEGG PATHWAY
##Statistical test method: hypergeometric test / Fisher's exact test
##FDR correction method: Benjamini and Hochberg
#Term	Database	ID	Input number	Background number	P-Value	Corrected P-Value	Input	KEGG_ID/KO	Entrez_ID	Hyperlink
Valine, leucine and isoleucine degradation	KEGG PATHWAY	csv00280	14	50	0.00018505	0.0201705	Csa7G448900|Csa1G599400|Csa7G073600|Csa3G038200|Csa7G387180|Csa3G823050|Csa7G066830|Csa2G129150|Csa2G352930|Csa3G164470|Csa6G395130|Csa6G291910|Csa4G043870|Csa3G133140	csv:101205436|csv:101216174|csv:101204438|csv:101228996|csv:101221786|csv:101207316|csv:101204924|csv:101212301|csv:101214004|csv:101206829|csv:101216977|csv:101216988|csv:101221321|csv:101217710|	101205436|101216174|101204438|101228996|101221786|101207316|101204924|101212301|101214004|101206829|101216977|101216988|101221321|101217710|	http://www.genome.jp/kegg-bin/show_pathway?csv00280/csv:101212301%09red/csv:101205436%09red/csv:101216174%09red/csv:101221321%09red/csv:101214004%09red/csv:101216977%09red/csv:101216988%09red/csv:101204924%09red/csv:101206829%09red/csv:101221786%09red/csv:101207316%09red/csv:101204438%09red/csv:101228996%09red/csv:101217710%09red
Nitrogen metabolism	KEGG PATHWAY	csv00910	12	45	0.000758345	0.0413298	Csa1G120410|Csa1G120420|Novel00117|Csa3G603580|Csa1G120450|Csa3G821030|Csa5G599860|Csa3G207890|Csa5G383850|Csa4G192110|Csa3G776970|Csa3G150160	csv:101221989|csv:101222229|csv:101212995|csv:101213224|csv:101232731|csv:101214380|csv:101212365|csv:101217505|csv:101219000|csv:101221948|csv:101209642|csv:101212441|	101221989|101222229|101212995|101213224|101232731|101214380|101212365|101217505|101219000|101221948|101209642|101212441|	http://www.genome.jp/kegg-bin/show_pathway?csv00910/csv:101222229%09red/csv:101212995%09red/csv:101232731%09red/csv:101219000%09red/csv:101221948%09red/csv:101217505%09red/csv:101212365%09red/csv:101212441%09red/csv:101221989%09red/csv:101214380%09red/csv:101213224%09red/csv:101209642%09red
Phenylalanine metabolism	KEGG PATHWAY	csv00360	26	166	0.00183262	0.0545682	Csa2G070200|Csa7G073660|Csa6G423480|Csa4G629470|Csa4G285780|Csa4G026850|Csa6G445750|Csa1G108800|Csa6G445240|Csa3G710200|Csa4G651760|Csa6G490230|Csa6G423980|Csa6G213910|Csa2G070210|Csa7G061710|Csa7G049140|Csa4G285730|Csa4G285790|Csa6G446290|Csa4G285750|Csa7G430250|Csa6G133710|Csa6G216410|Csa3G234000|Csa6G445740	csv:101204747|csv:101205648|csv:101222232|csv:101231189|csv:101211989|csv:101211442|csv:101218382|csv:101220141|csv:101217907|csv:101215427|csv:101228848|csv:101228067|csv:101229213|csv:101227020|csv:101204747|csv:101217567|csv:101229961|csv:101212957|csv:101211752|csv:101218856|csv:101217781|csv:101228371|csv:101221846|csv:101204245|csv:101221475|csv:101218144|	101204747|101205648|101222232|101231189|101211989|101211442|101218382|101220141|101217907|101215427|101228848|101228067|101229213|101227020|101204747|101217567|101229961|101212957|101211752|101218856|101217781|101228371|101221846|101204245|101221475|101218144|	http://www.genome.jp/kegg-bin/show_pathway?csv00360/csv:101211442%09red/csv:101231189%09red/csv:101222232%09red/csv:101204245%09red/csv:101215427%09red/csv:101228067%09red/csv:101221475%09red/csv:101217907%09red/csv:101211989%09red/csv:101211752%09red/csv:101221846%09red/csv:101205648%09red/csv:101227020%09red/csv:101229961%09red/csv:101228848%09red/csv:101218144%09red/csv:101229213%09red/csv:101…
Phenylpropanoid biosynthesis	KEGG PATHWAY	csv00940	31	214	0.0021421	0.0545682	Csa2G070200|Csa4G001720|Csa7G073660|Csa4G285780|Csa1G042700|Csa4G026850|Csa6G445750|Csa1G108800|Csa1G025780|Csa6G445240|Csa3G710200|Csa4G651760|Csa6G490230|Csa4G091880|Csa7G061710|Csa6G213910|Csa2G070210|Csa6G216410|Csa7G049140|Csa4G285730|Csa4G285790|Csa1G611270|Csa1G611820|Csa7G432010|Csa6G446290|Csa4G031070|Csa4G285750|Csa7G430250|Csa7G071700|Csa6G133710|Csa6G445740	csv:101204747|csv:101226132|csv:101205648|csv:101211989|csv:101218046|csv:101211442|csv:101218382|csv:101220141|csv:101204835|csv:101217907|csv:101215427|csv:101228848|csv:101228067|csv:101204109|csv:101217567|csv:101227020|csv:101204747|csv:101204245|csv:101229961|csv:101212957|csv:101211752|csv:101208027|csv:101229333|csv:101213412|csv:101218856|csv:101208174|csv:101217781|csv:101228371|csv:101…	101204747|101226132|101205648|101211989|101218046|101211442|101218382|101220141|101204835|101217907|101215427|101228848|101228067|101204109|101217567|101227020|101204747|101204245|101229961|101212957|101211752|101208027|101229333|101213412|101218856|101208174|101217781|101228371|101214622|101221846|101218144|	http://www.genome.jp/kegg-bin/show_pathway?csv00940/csv:101213412%09red/csv:101211442%09red/csv:101226132%09red/csv:101217907%09red/csv:101215427%09red/csv:101228067%09red/csv:101204835%09red/csv:101218382%09red/csv:101211989%09red/csv:101211752%09red/csv:101204245%09red/csv:101208027%09red/csv:101205648%09red/csv:101227020%09red/csv:101218046%09red/csv:101229961%09red/csv:101228848%09red/csv:101…
Alanine, aspartate and glutamate metabolism	KEGG PATHWAY	csv00250	14	69	0.00277148	0.0545682	Csa6G433300|Csa2G252070|Csa6G135470|Csa4G036590|Csa5G598730|Csa5G100000|Csa3G603580|Csa4G326550|Csa5G524850|Csa7G448000|Csa1G045490|Csa4G192110|Csa1G031730|Csa3G150160	csv:101207975|csv:101203840|csv:101217352|csv:101208662|csv:101213570|csv:101231718|csv:101213224|csv:101210304|csv:101205815|csv:101212146|csv:101214440|csv:101221948|csv:101210903|csv:101212441|	101207975|101203840|101217352|101208662|101213570|101231718|101213224|101210304|101205815|101212146|101214440|101221948|101210903|101212441|	http://www.genome.jp/kegg-bin/show_pathway?csv00250/csv:101203840%09red/csv:101214440%09red/csv:101208662%09red/csv:101212146%09red/csv:101210304%09red/csv:101213570%09red/csv:101217352%09red/csv:101207975%09red/csv:101210903%09red/csv:101212441%09red/csv:101231718%09red/csv:101205815%09red/csv:101213224%09red/csv:101221948%09red
Sulfur metabolism	KEGG PATHWAY	csv00920	11	47	0.00300376	0.0545682	Csa1G574810|Csa3G769110|Csa6G513670|Csa1G062380|Csa3G872050|Csa2G406690|Csa4G621190|Csa1G614130|Csa5G589260|Csa6G509570|Csa6G004600	csv:101218979|csv:101213467|csv:101220567|csv:101211864|csv:101217416|csv:101210754|csv:101221943|csv:101214065|csv:101230960|csv:101231382|csv:101220896|	101218979|101213467|101220567|101211864|101217416|101210754|101221943|101214065|101230960|101231382|101220896|	http://www.genome.jp/kegg-bin/show_pathway?csv00920/csv:101218979%09red/csv:101220567%09red/csv:101230960%09red/csv:101221943%09red/csv:101213467%09red/csv:101231382%09red/csv:101211864%09red/csv:101220896%09red/csv:101217416%09red/csv:101214065%09red/csv:101210754%09red
Biosynthesis of secondary metabolites	KEGG PATHWAY	csv01110	122	1238	0.0110867	0.172636	Csa6G117710|Csa5G611700|Csa3G603580|Csa6G448730|Csa4G629470|Csa6G445240|Csa1G108800|Csa3G710200|Csa6G490230|Csa6G423980|Csa3G903530|Csa6G017060|Csa3G823050|Csa3G144140|Csa6G448720|Csa1G014400|Csa3G164470|Csa6G522820|Csa1G615730|Csa6G497310|Csa4G312240|Csa1G042700|Csa6G395130|Csa4G285730|Csa3G822260|Novel00126|Csa4G269130|Csa6G151110|Csa3G149890|Csa7G211090|Csa2G417830|Csa4G658590|Csa2G352930|Csa2…	csv:101213994|csv:101211316|csv:101213224|csv:101205445|csv:101231189|csv:101217907|csv:101220141|csv:101215427|csv:101228067|csv:101229213|csv:101228426|csv:101210090|csv:101207316|csv:101219531|csv:101205446|csv:101225817|csv:101206829|csv:101221194|csv:101215511|csv:101222240|csv:101217534|csv:101218046|csv:101216977|csv:101212957|csv:101229106|csv:101223618|csv:101219033|csv:101205753|csv:101…	101213994|101211316|101213224|101205445|101231189|101217907|101220141|101215427|101228067|101229213|101228426|101210090|101207316|101219531|101205446|101225817|101206829|101221194|101215511|101222240|101217534|101218046|101216977|101212957|101229106|101223618|101219033|101205753|101208605|101204450|101217625|101202931|101214004|101229385|101230781|101211977|101222151|101208883|101207975|101223130…	http://www.genome.jp/kegg-bin/show_pathway?csv01110/csv:101231189%09red/csv:101215287%09red/csv:101230757%09red/csv:101223618%09red/csv:101206829%09red/csv:101215687%09red/csv:101205436%09red/csv:101219531%09red/csv:101213038%09red/csv:101211752%09red/csv:101216594%09red/csv:101221846%09red/csv:101228371%09red/csv:101204450%09red/csv:101230478%09red/csv:101217625%09red/csv:101215511%09red/csv:101…
Brassinosteroid biosynthesis	KEGG PATHWAY	csv00905	5	15	0.0130657	0.17802	Csa4G038710|Csa2G006030|Csa1G305710|Csa5G202330|Csa5G641590	csv:101211854|csv:101208789|csv:101213466|csv:101216594|csv:101206858|	101211854|101208789|101213466|101216594|101206858|	http://www.genome.jp/kegg-bin/show_pathway?csv00905/csv:101216594%09red/csv:101208789%09red/csv:101206858%09red/csv:101213466%09red/csv:101211854%09red
Carbon metabolism	KEGG PATHWAY	csv01200	36	304	0.0173756	0.210438	Csa5G598730|Csa5G611700|Csa6G448730|Csa1G050250|Csa4G377740|Csa1G062310|Csa6G136020|Csa6G077460|Csa2G420990|Csa7G066830|Csa6G004600|Csa3G836500|Csa5G512860|Csa1G574810|Csa6G433300|Csa7G048110|Csa5G642720|Csa3G252490|Csa1G014400|Csa6G008590|Csa1G615730|Csa1G050360|Csa6G448720|Csa3G638540|Csa7G239010|Csa3G769110|Csa2G351700|Csa6G497310|Csa5G603950|Csa6G151120|Csa5G609710|Csa5G571460|Csa7G448000|Csa…	csv:101213570|csv:101211316|csv:101205445|csv:101226669|csv:101215287|csv:101209820|csv:101226860|csv:101211955|csv:101214114|csv:101204924|csv:101220896|csv:101213516|csv:101208883|csv:101218979|csv:101207975|csv:101208202|csv:101226257|csv:101202856|csv:101225817|csv:101214545|csv:101215511|csv:101214523|csv:101205446|csv:101220055|csv:101229073|csv:101213467|csv:101217746|csv:101222240|csv:101…	101213570|101211316|101205445|101226669|101215287|101209820|101226860|101211955|101214114|101204924|101220896|101213516|101208883|101218979|101207975|101208202|101226257|101202856|101225817|101214545|101215511|101214523|101205446|101220055|101229073|101213467|101217746|101222240|101208773|101205520|101219300|101212988|101212146|101230960|101231382|101211447|	http://www.genome.jp/kegg-bin/show_pathway?csv01200/csv:101211447%09red/csv:101230960%09red/csv:101214545%09red/csv:101215287%09red/csv:101213570%09red/csv:101202856%09red/csv:101212988%09red/csv:101215511%09red/csv:101229073%09red/csv:101226860%09red/csv:101208773%09red/csv:101231382%09red/csv:101208202%09red/csv:101214523%09red/csv:101225817%09red/csv:101214114%09red/csv:101217746%09red/csv:101…
Biosynthesis of amino acids	KEGG PATHWAY	csv01230	36	313	0.0248318	0.249573	Csa5G598730|Csa6G151110|Csa5G611700|Csa3G603580|Csa2G417830|Csa6G448730|Csa7G432140|Csa1G050250|Csa4G629470|Csa4G377740|Csa2G296130|Csa6G446510|Csa5G571460|Csa6G499800|Csa5G457770|Csa6G004600|Csa2G236630|Csa3G150160|Csa3G363180|Csa6G448720|Csa1G014400|Csa6G008590|Csa7G448000|Csa6G136020|Csa7G239010|Csa3G769110|Csa7G448900|Csa6G497310|Csa2G352930|Csa6G077460|Csa6G151120|Csa1G145980|Csa3G822260|Csa…	csv:101213570|csv:101205753|csv:101211316|csv:101213224|csv:101217625|csv:101205445|csv:101211809|csv:101226669|csv:101231189|csv:101215287|csv:101229385|csv:101230781|csv:101212988|csv:101207177|csv:101222001|csv:101220896|csv:101213242|csv:101212441|csv:101224798|csv:101205446|csv:101225817|csv:101214545|csv:101212146|csv:101226860|csv:101229073|csv:101213467|csv:101205436|csv:101222240|csv:101…	101213570|101205753|101211316|101213224|101217625|101205445|101211809|101226669|101231189|101215287|101229385|101230781|101212988|101207177|101222001|101220896|101213242|101212441|101224798|101205446|101225817|101214545|101212146|101226860|101229073|101213467|101205436|101222240|101214004|101211955|101205520|101222151|101229106|101218979|101230960|101231382|	http://www.genome.jp/kegg-bin/show_pathway?csv01230/csv:101213242%09red/csv:101205436%09red/csv:101229385%09red/csv:101214545%09red/csv:101215287%09red/csv:101213570%09red/csv:101212988%09red/csv:101205753%09red/csv:101211809%09red/csv:101224798%09red/csv:101229073%09red/csv:101231189%09red/csv:101231382%09red/csv:101225817%09red/csv:101220896%09red/csv:101226860%09red/csv:101205446%09red/csv:101…
Glyoxylate and dicarboxylate metabolism	KEGG PATHWAY	csv00630	12	75	0.0251863	0.249573	Csa6G433300|Csa4G377740|Csa5G598730|Csa2G420990|Csa6G497310|Csa3G836500|Csa5G609710|Csa3G821030|Csa1G050360|Csa4G658590|Csa1G654900|Csa3G150160	csv:101207975|csv:101215287|csv:101213570|csv:101214114|csv:101222240|csv:101213516|csv:101219300|csv:101214380|csv:101214523|csv:101202931|csv:101230478|csv:101212441|	101207975|101215287|101213570|101214114|101222240|101213516|101219300|101214380|101214523|101202931|101230478|101212441|	http://www.genome.jp/kegg-bin/show_pathway?csv00630/csv:101214523%09red/csv:101207975%09red/csv:101215287%09red/csv:101213570%09red/csv:101202931%09red/csv:101219300%09red/csv:101230478%09red/csv:101214114%09red/csv:101212441%09red/csv:101213516%09red/csv:101214380%09red/csv:101222240%09red
Butanoate metabolism	KEGG PATHWAY	csv00650	6	27	0.0312668	0.26891	Csa6G135470|Csa3G038200|Csa3G823050|Csa5G100000|Csa3G234000|Csa1G031730	csv:101217352|csv:101228996|csv:101207316|csv:101231718|csv:101221475|csv:101210903|	101217352|101228996|101207316|101231718|101221475|101210903|	http://www.genome.jp/kegg-bin/show_pathway?csv00650/csv:101221475%09red/csv:101217352%09red/csv:101228996%09red/csv:101210903%09red/csv:101231718%09red/csv:101207316%09red
Glycine, serine and threonine metabolism	KEGG PATHWAY	csv00260	15	106	0.0320719	0.26891	Csa6G433300|Csa6G423980|Csa1G062310|Csa5G598730|Csa2G351700|Csa7G448900|Csa6G497310|Csa5G457770|Csa6G448720|Csa4G326550|Csa6G448730|Csa6G423480|Csa4G036590|Csa4G377740|Csa6G151120	csv:101207975|csv:101229213|csv:101209820|csv:101213570|csv:101217746|csv:101205436|csv:101222240|csv:101222001|csv:101205446|csv:101210304|csv:101205445|csv:101222232|csv:101208662|csv:101215287|csv:101205520|	101207975|101229213|101209820|101213570|101217746|101205436|101222240|101222001|101205446|101210304|101205445|101222232|101208662|101215287|101205520|	http://www.genome.jp/kegg-bin/show_pathway?csv00260/csv:101208662%09red/csv:101205436%09red/csv:101217746%09red/csv:101215287%09red/csv:101210304%09red/csv:101222232%09red/csv:101213570%09red/csv:101205520%09red/csv:101229213%09red/csv:101209820%09red/csv:101222001%09red/csv:101207975%09red/csv:101222240%09red/csv:101205446%09red/csv:101205445%09red
Carbon fixation in photosynthetic organisms	KEGG PATHWAY	csv00710	14	99	0.0376528	0.293154	Csa3G638540|Csa7G239010|Csa6G136020|Csa5G598730|Csa5G571460|Csa7G048110|Csa5G611700|Csa3G252490|Csa6G077460|Csa6G008590|Csa5G609710|Csa1G050250|Csa7G448000|Csa4G307360	csv:101220055|csv:101229073|csv:101226860|csv:101213570|csv:101212988|csv:101208202|csv:101211316|csv:101202856|csv:101211955|csv:101214545|csv:101219300|csv:101226669|csv:101212146|csv:101211447|	101220055|101229073|101226860|101213570|101212988|101208202|101211316|101202856|101211955|101214545|101219300|101226669|101212146|101211447|	http://www.genome.jp/kegg-bin/show_pathway?csv00710/csv:101226669%09red/csv:101211447%09red/csv:101212146%09red/csv:101220055%09red/csv:101214545%09red/csv:101208202%09red/csv:101202856%09red/csv:101213570%09red/csv:101219300%09red/csv:101229073%09red/csv:101211955%09red/csv:101211316%09red/csv:101212988%09red/csv:101226860%09red
alpha-Linolenic acid metabolism	KEGG PATHWAY	csv00592	10	68	0.0592956	0.430882	Csa2G415540|Csa3G859730|Csa4G288610|Csa2G129150|Csa3G731060|Csa5G366670|Csa7G041960|Novel00145|Csa3G829270|Csa3G133140	csv:101220632|csv:101220850|csv:101228070|csv:101212301|csv:101209181|csv:101222233|csv:101223126|csv:101203714|csv:101218397|csv:101217710|	101220632|101220850|101228070|101212301|101209181|101222233|101223126|101203714|101218397|101217710|	http://www.genome.jp/kegg-bin/show_pathway?csv00592/csv:101203714%09red/csv:101212301%09red/csv:101217710%09red/csv:101220632%09red/csv:101223126%09red/csv:101222233%09red/csv:101228070%09red/csv:101220850%09red/csv:101209181%09red/csv:101218397%09red
Stilbenoid, diarylheptanoid and gingerol biosynthesis	KEGG PATHWAY	csv00945	4	17	0.0639467	0.435637	Csa6G133710|Csa7G073660|Csa2G070200|Csa2G070210	csv:101221846|csv:101205648|csv:101204747|csv:101204747|	101221846|101205648|101204747|101204747|	http://www.genome.jp/kegg-bin/show_pathway?csv00945/csv:101205648%09red/csv:101221846%09red/csv:101204747%09red
Fatty acid degradation	KEGG PATHWAY	csv00071	8	59	0.117625	0.626964	Csa2G415540|Csa7G448900|Csa2G129150|Csa4G043870|Csa7G031600|Csa3G731060|Csa3G149320|Csa3G133140	csv:101220632|csv:101205436|csv:101212301|csv:101221321|csv:101212158|csv:101209181|csv:101207461|csv:101217710|	101220632|101205436|101212301|101221321|101212158|101209181|101207461|101217710|	http://www.genome.jp/kegg-bin/show_pathway?csv00071/csv:101212301%09red/csv:101205436%09red/csv:101220632%09red/csv:101207461%09red/csv:101212158%09red/csv:101209181%09red/csv:101221321%09red/csv:101217710%09red
Cyanoamino acid metabolism	KEGG PATHWAY	csv00460	10	80	0.124539	0.626964	Csa4G377740|Csa4G001720|Csa4G031070|Csa6G497310|Csa6G004600|Csa1G042700|Csa1G025780|Csa2G055560|Csa1G611270|Csa1G611820	csv:101215287|csv:101226132|csv:101208174|csv:101222240|csv:101220896|csv:101218046|csv:101204835|csv:101223263|csv:101208027|csv:101229333|	101215287|101226132|101208174|101222240|101220896|101218046|101204835|101223263|101208027|101229333|	http://www.genome.jp/kegg-bin/show_pathway?csv00460/csv:101223263%09red/csv:101218046%09red/csv:101226132%09red/csv:101215287%09red/csv:101204835%09red/csv:101208174%09red/csv:101220896%09red/csv:101208027%09red/csv:101229333%09red/csv:101222240%09red
Cysteine and methionine metabolism	KEGG PATHWAY	csv00270	14	122	0.126712	0.626964	Csa6G446510|Csa7G009190|Csa3G769110|Csa3G002890|Csa5G457770|Csa6G004600|Csa3G822260|Csa3G129660|Csa4G629470|Csa2G036680|Csa1G574810|Csa5G589260|Csa6G509570|Csa2G036690	csv:101230781|csv:101204791|csv:101213467|csv:101232070|csv:101222001|csv:101220896|csv:101229106|csv:101209658|csv:101231189|csv:101215844|csv:101218979|csv:101230960|csv:101231382|csv:101215844|	101230781|101204791|101213467|101232070|101222001|101220896|101229106|101209658|101231189|101215844|101218979|101230960|101231382|101215844|	http://www.genome.jp/kegg-bin/show_pathway?csv00270/csv:101230781%09red/csv:101230960%09red/csv:101231189%09red/csv:101218979%09red/csv:101213467%09red/csv:101209658%09red/csv:101231382%09red/csv:101229106%09red/csv:101220896%09red/csv:101222001%09red/csv:101232070%09red/csv:101204791%09red/csv:101215844%09red
Ubiquinone and other terpenoid-quinone biosynthesis	KEGG PATHWAY	csv00130	7	51	0.132142	0.626964	Csa2G070200|Csa2G070210|Csa7G430250|Csa6G133710|Csa1G108800|Csa3G710200|Csa4G629470	csv:101204747|csv:101204747|csv:101228371|csv:101221846|csv:101220141|csv:101215427|csv:101231189|	101204747|101204747|101228371|101221846|101220141|101215427|101231189|	http://www.genome.jp/kegg-bin/show_pathway?csv00130/csv:101228371%09red/csv:101215427%09red/csv:101231189%09red/csv:101220141%09red/csv:101221846%09red/csv:101204747%09red
Fatty acid elongation	KEGG PATHWAY	csv00062	4	23	0.13322	0.626964	Csa5G609650|Csa2G361630|Csa3G019340|Csa3G144140	csv:101218433|csv:101217470|csv:101222043|csv:101219531|	101218433|101217470|101222043|101219531|	http://www.genome.jp/kegg-bin/show_pathway?csv00062/csv:101217470%09red/csv:101219531%09red/csv:101218433%09red/csv:101222043%09red
Valine, leucine and isoleucine biosynthesis	KEGG PATHWAY	csv00290	4	23	0.13322	0.626964	Csa6G448720|Csa6G448730|Csa3G363180|Csa2G352930	csv:101205446|csv:101205445|csv:101224798|csv:101214004|	101205446|101205445|101224798|101214004|	http://www.genome.jp/kegg-bin/show_pathway?csv00290/csv:101214004%09red/csv:101224798%09red/csv:101205446%09red/csv:101205445%09red
Flavonoid biosynthesis	KEGG PATHWAY	csv00941	4	23	0.13322	0.626964	Csa6G133710|Csa7G073660|Csa2G070200|Csa2G070210	csv:101221846|csv:101205648|csv:101204747|csv:101204747|	101221846|101205648|101204747|101204747|	http://www.genome.jp/kegg-bin/show_pathway?csv00941/csv:101205648%09red/csv:101221846%09red/csv:101204747%09red
Synthesis and degradation of ketone bodies	KEGG PATHWAY	csv00072	2	7	0.138047	0.626964	Csa3G823050|Csa3G038200	csv:101207316|csv:101228996|	101207316|101228996|	http://www.genome.jp/kegg-bin/show_pathway?csv00072/csv:101207316%09red/csv:101228996%09red
DNA replication	KEGG PATHWAY	csv03030	8	63	0.149581	0.652172	Csa6G538780|Csa5G614640|Csa6G522780|Csa7G004140|Csa5G647410|Csa3G722880|Csa1G013800|Csa7G407650	csv:101223575|csv:101229844|csv:101210889|csv:101211850|csv:101203146|csv:101219546|csv:101208545|csv:101219064|	101223575|101229844|101210889|101211850|101203146|101219546|101208545|101219064|	http://www.genome.jp/kegg-bin/show_pathway?csv03030/csv:101229844%09red/csv:101219064%09red/csv:101211850%09red/csv:101210889%09red/csv:101203146%09red/csv:101208545%09red/csv:101223575%09red/csv:101219546%09red
Steroid biosynthesis	KEGG PATHWAY	csv00100	6	44	0.159359	0.668082	Csa1G050410|Csa3G689280|Csa2G353480|Csa4G103350|Csa6G522820|Csa3G588470	csv:101215719|csv:101217389|csv:101213038|csv:101217570|csv:101221194|csv:101225429|	101215719|101217389|101213038|101217570|101221194|101225429|	http://www.genome.jp/kegg-bin/show_pathway?csv00100/csv:101217389%09red/csv:101215719%09red/csv:101217570%09red/csv:101225429%09red/csv:101213038%09red/csv:101221194%09red
Plant hormone signal transduction	KEGG PATHWAY	csv04075	35	366	0.165995	0.670127	Csa2G011420|Csa4G007100|Csa2G177210|Csa3G866510|Csa3G730890|Csa2G258620|Csa5G217670|Csa2G225320|Csa7G448810|Csa2G035330|Csa3G902270|Csa3G902310|Csa1G397130|Novel00616|Csa4G615240|Csa7G008430|Csa1G524760|Csa2G258810|Csa4G052740|Csa4G308640|Csa1G422480|Csa3G143580|Csa5G434550|Csa3G150830|Csa3G135120|Csa6G008720|Csa3G604110|Csa3G171820|Csa6G152350|Csa2G258100|Csa2G200420|Csa6G452710|Csa3G731880|Nove…	csv:101231359|csv:101206247|csv:101206564|csv:101216825|csv:101206842|csv:101210699|csv:101230656|csv:101223351|csv:101207496|csv:101216738|csv:101218165|csv:101230090|csv:101230591|csv:101216386|csv:101205993|csv:101203330|csv:101226308|csv:101232762|csv:101213942|csv:101214383|csv:101217606|csv:101227161|csv:101231852|csv:101215807|csv:101210326|csv:101220425|csv:101214188|csv:101208334|csv:101…	101231359|101206247|101206564|101216825|101206842|101210699|101230656|101223351|101207496|101216738|101218165|101230090|101230591|101216386|101205993|101203330|101226308|101232762|101213942|101214383|101217606|101227161|101231852|101215807|101210326|101220425|101214188|101208334|101223216|101210457|101223691|101214730|101214383|101216386|101230798|	http://www.genome.jp/kegg-bin/show_pathway?csv04075/csv:101223691%09red/csv:101227161%09red/csv:101226308%09red/csv:101223351%09red/csv:101210326%09red/csv:101203330%09red/csv:101230656%09red/csv:101216386%09red/csv:101206842%09red/csv:101214188%09red/csv:101230798%09red/csv:101232762%09red/csv:101230090%09red/csv:101206247%09red/csv:101230591%09red/csv:101231359%09red/csv:101220425%09red/csv:101…
Tryptophan metabolism	KEGG PATHWAY	csv00380	5	36	0.180874	0.696834	Csa4G658590|Csa7G448900|Csa3G619930|Csa5G512860|Csa4G043870	csv:101202931|csv:101205436|csv:101203521|csv:101208883|csv:101221321|	101202931|101205436|101203521|101208883|101221321|	http://www.genome.jp/kegg-bin/show_pathway?csv00380/csv:101202931%09red/csv:101221321%09red/csv:101203521%09red/csv:101208883%09red/csv:101205436%09red
Peroxisome	KEGG PATHWAY	csv04146	11	99	0.185396	0.696834	Csa6G433300|Csa2G415540|Csa1G613540|Csa3G100790|Csa3G823050|Csa2G129150|Csa7G031600|Csa3G731060|Csa3G149320|Csa4G658590|Csa3G133140	csv:101207975|csv:101220632|csv:101211977|csv:101228605|csv:101207316|csv:101212301|csv:101212158|csv:101209181|csv:101207461|csv:101202931|csv:101217710|	101207975|101220632|101211977|101228605|101207316|101212301|101212158|101209181|101207461|101202931|101217710|	http://www.genome.jp/kegg-bin/show_pathway?csv04146/csv:101212301%09red/csv:101217710%09red/csv:101220632%09red/csv:101207461%09red/csv:101228605%09red/csv:101202931%09red/csv:101212158%09red/csv:101209181%09red/csv:101207975%09red/csv:101207316%09red/csv:101211977%09red
Glycerolipid metabolism	KEGG PATHWAY	csv00561	8	68	0.19471	0.69728	Csa7G412840|Csa5G580630|Csa2G382780|Csa2G058110|Csa7G448900|Csa4G293170|Csa4G043870|Csa3G732400	csv:101218362|csv:101211924|csv:101209030|csv:101217776|csv:101205436|csv:101210022|csv:101221321|csv:101214865|	101218362|101211924|101209030|101217776|101205436|101210022|101221321|101214865|	http://www.genome.jp/kegg-bin/show_pathway?csv00561/csv:101209030%09red/csv:101221321%09red/csv:101205436%09red/csv:101211924%09red/csv:101217776%09red/csv:101214865%09red/csv:101218362%09red/csv:101210022%09red
Lysine degradation	KEGG PATHWAY	csv00310	4	28	0.206472	0.69728	Csa1G598330|Csa7G448900|Csa5G512860|Csa4G043870	csv:101214976|csv:101205436|csv:101208883|csv:101221321|	101214976|101205436|101208883|101221321|	http://www.genome.jp/kegg-bin/show_pathway?csv00310/csv:101214976%09red/csv:101221321%09red/csv:101205436%09red/csv:101208883%09red
Biosynthesis of unsaturated fatty acids	KEGG PATHWAY	csv01040	7	59	0.210503	0.69728	Csa2G415540|Csa2G129150|Csa4G006050|Csa3G731060|Csa4G192180|Csa5G207960|Csa3G133140	csv:101220632|csv:101212301|csv:101225014|csv:101209181|csv:101221009|csv:101223135|csv:101217710|	101220632|101212301|101225014|101209181|101221009|101223135|101217710|	http://www.genome.jp/kegg-bin/show_pathway?csv01040/csv:101221009%09red/csv:101212301%09red/csv:101217710%09red/csv:101220632%09red/csv:101223135%09red/csv:101209181%09red/csv:101225014%09red
Plant-pathogen interaction	KEGG PATHWAY	csv04626	18	181	0.213102	0.69728	Csa1G002110|Novel00616|Csa5G608150|Csa3G183950|Csa5G152170|Csa3G319280|Csa3G845500|Csa7G448810|Csa1G025020|Novel00628|Csa3G607120|Csa3G823060|Csa3G902270|Csa1G025960|Csa2G406780|Csa4G172540|Csa5G636620|Csa3G727960	csv:101215508|csv:101216386|csv:101225943|csv:101223769|csv:101212879|csv:101218237|csv:101209614|csv:101207496|csv:101220025|csv:101216386|csv:101225466|csv:101207567|csv:101218165|csv:101207158|csv:101226137|csv:101208990|csv:101211506|csv:101220738|	101215508|101216386|101225943|101223769|101212879|101218237|101209614|101207496|101220025|101216386|101225466|101207567|101218165|101207158|101226137|101208990|101211506|101220738|	http://www.genome.jp/kegg-bin/show_pathway?csv04626/csv:101207567%09red/csv:101225466%09red/csv:101226137%09red/csv:101223769%09red/csv:101211506%09red/csv:101225943%09red/csv:101208990%09red/csv:101220025%09red/csv:101218165%09red/csv:101212879%09red/csv:101207496%09red/csv:101215508%09red/csv:101209614%09red/csv:101207158%09red/csv:101216386%09red/csv:101220738%09red/csv:101218237%09red
Degradation of aromatic compounds	KEGG PATHWAY	csv01220	3	19	0.2175	0.69728	Csa6G133710|Csa2G070200|Csa2G070210	csv:101221846|csv:101204747|csv:101204747|	101221846|101204747|101204747|	http://www.genome.jp/kegg-bin/show_pathway?csv01220/csv:101221846%09red/csv:101204747%09red
Terpenoid backbone biosynthesis	KEGG PATHWAY	csv00900	8	72	0.234354	0.720345	Csa6G117710|Csa6G017060|Csa3G038200|Csa6G185830|Csa3G270270|Csa7G211090|Csa3G113320|Csa4G049620	csv:101213994|csv:101210090|csv:101228996|csv:101225762|csv:101206540|csv:101204450|csv:101212112|csv:101212970|	101213994|101210090|101228996|101225762|101206540|101204450|101212112|101212970|	http://www.genome.jp/kegg-bin/show_pathway?csv00900/csv:101210090%09red/csv:101206540%09red/csv:101225762%09red/csv:101212112%09red/csv:101212970%09red/csv:101204450%09red/csv:101228996%09red/csv:101213994%09red
beta-Alanine metabolism	KEGG PATHWAY	csv00410	7	62	0.243572	0.720345	Csa6G423980|Csa7G448900|Csa4G043870|Csa6G423480|Csa5G100000|Csa7G066830|Csa1G031730	csv:101229213|csv:101205436|csv:101221321|csv:101222232|csv:101231718|csv:101204924|csv:101210903|	101229213|101205436|101221321|101222232|101231718|101204924|101210903|	http://www.genome.jp/kegg-bin/show_pathway?csv00410/csv:101221321%09red/csv:101205436%09red/csv:101222232%09red/csv:101229213%09red/csv:101204924%09red/csv:101210903%09red/csv:101231718%09red
2-Oxocarboxylic acid metabolism	KEGG PATHWAY	csv01210	7	63	0.254944	0.720345	Csa3G363180|Csa5G598730|Csa5G457770|Csa2G352930|Csa2G236630|Csa7G432140|Csa7G448000	csv:101224798|csv:101213570|csv:101222001|csv:101214004|csv:101213242|csv:101211809|csv:101212146|	101224798|101213570|101222001|101214004|101213242|101211809|101212146|	http://www.genome.jp/kegg-bin/show_pathway?csv01210/csv:101213242%09red/csv:101212146%09red/csv:101214004%09red/csv:101213570%09red/csv:101211809%09red/csv:101224798%09red/csv:101222001%09red
Galactose metabolism	KEGG PATHWAY	csv00052	8	74	0.255154	0.720345	Csa4G167980|Csa5G174590|Csa3G777580|Csa3G827250|Csa5G580630|Csa4G631570|Csa1G615730|Csa4G646140	csv:101211538|csv:101230590|csv:101223138|csv:101226474|csv:101211924|csv:101214893|csv:101215511|csv:101215520|	101211538|101230590|101223138|101226474|101211924|101214893|101215511|101215520|	http://www.genome.jp/kegg-bin/show_pathway?csv00052/csv:101226474%09red/csv:101211538%09red/csv:101223138%09red/csv:101211924%09red/csv:101214893%09red/csv:101215520%09red/csv:101215511%09red/csv:101230590%09red
Histidine metabolism	KEGG PATHWAY	csv00340	3	21	0.257738	0.720345	Csa7G448900|Csa6G057160|Csa4G043870	csv:101205436|csv:101230757|csv:101221321|	101205436|101230757|101221321|	http://www.genome.jp/kegg-bin/show_pathway?csv00340/csv:101230757%09red/csv:101221321%09red/csv:101205436%09red
Starch and sucrose metabolism	KEGG PATHWAY	csv00500	25	275	0.286923	0.739672	Csa7G447990|Csa4G001720|Csa3G035870|Csa3G149890|Csa2G167190|Csa3G047820|Csa7G405820|Csa5G174590|Csa1G042700|Csa3G017020|Csa2G037230|Csa1G025780|Csa7G343870|Csa7G343850|Csa4G646140|Csa3G777580|Csa5G172290|Csa4G001950|Csa6G357030|Csa1G615730|Csa5G149880|Csa1G611270|Csa1G611820|Csa4G031070|Csa5G322500	csv:101212388|csv:101226132|csv:101210949|csv:101208605|csv:101216744|csv:101210545|csv:101205321|csv:101230590|csv:101218046|csv:101213455|csv:101214888|csv:101204835|csv:101220821|csv:101221055|csv:101215520|csv:101223138|csv:101212568|csv:101203847|csv:101215687|csv:101215511|csv:101226999|csv:101208027|csv:101229333|csv:101208174|csv:101211461|	101212388|101226132|101210949|101208605|101216744|101210545|101205321|101230590|101218046|101213455|101214888|101204835|101220821|101221055|101215520|101223138|101212568|101203847|101215687|101215511|101226999|101208027|101229333|101208174|101211461|	http://www.genome.jp/kegg-bin/show_pathway?csv00500/csv:101210545%09red/csv:101214888%09red/csv:101211461%09red/csv:101226132%09red/csv:101213455%09red/csv:101220821%09red/csv:101216744%09red/csv:101215687%09red/csv:101210949%09red/csv:101223138%09red/csv:101204835%09red/csv:101205321%09red/csv:101230590%09red/csv:101215520%09red/csv:101218046%09red/csv:101212388%09red/csv:101215511%09red/csv:101…
Fructose and mannose metabolism	KEGG PATHWAY	csv00051	7	66	0.289919	0.739672	Csa3G300600|Csa5G167200|Csa5G172290|Csa6G008750|Csa1G615730|Csa2G049960|Csa4G307360	csv:101223130|csv:101220595|csv:101212568|csv:101229347|csv:101215511|csv:101209640|csv:101211447|	101223130|101220595|101212568|101229347|101215511|101209640|101211447|	http://www.genome.jp/kegg-bin/show_pathway?csv00051/csv:101212568%09red/csv:101211447%09red/csv:101229347%09red/csv:101223130%09red/csv:101220595%09red/csv:101215511%09red/csv:101209640%09red
Lysine biosynthesis	KEGG PATHWAY	csv00300	2	13	0.303751	0.739672	Csa7G448900|Csa5G457770	csv:101205436|csv:101222001|	101205436|101222001|	http://www.genome.jp/kegg-bin/show_pathway?csv00300/csv:101222001%09red/csv:101205436%09red
Taurine and hypotaurine metabolism	KEGG PATHWAY	csv00430	2	13	0.303751	0.739672	Csa1G031730|Csa5G100000	csv:101210903|csv:101231718|	101210903|101231718|	http://www.genome.jp/kegg-bin/show_pathway?csv00430/csv:101231718%09red/csv:101210903%09red
Arginine and proline metabolism	KEGG PATHWAY	csv00330	11	113	0.304402	0.739672	Csa2G036690|Csa7G448900|Csa4G043870|Csa2G236630|Csa7G432140|Csa2G036680|Csa2G252050|Csa1G045490|Csa4G192110|Csa3G150820|Csa3G150160	csv:101215844|csv:101205436|csv:101221321|csv:101213242|csv:101211809|csv:101215844|csv:101232003|csv:101214440|csv:101221948|csv:101215570|csv:101212441|	101215844|101205436|101221321|101213242|101211809|101215844|101232003|101214440|101221948|101215570|101212441|	http://www.genome.jp/kegg-bin/show_pathway?csv00330/csv:101214440%09red/csv:101213242%09red/csv:101215570%09red/csv:101221321%09red/csv:101205436%09red/csv:101221948%09red/csv:101211809%09red/csv:101212441%09red/csv:101232003%09red/csv:101215844%09red
Sphingolipid metabolism	KEGG PATHWAY	csv00600	4	34	0.305369	0.739672	Csa5G580630|Csa1G527930|Csa5G011660|Csa6G511770	csv:101211924|csv:101223340|csv:101212019|csv:101226642|	101211924|101223340|101212019|101226642|	http://www.genome.jp/kegg-bin/show_pathway?csv00600/csv:101212019%09red/csv:101211924%09red/csv:101223340%09red/csv:101226642%09red
Isoquinoline alkaloid biosynthesis	KEGG PATHWAY	csv00950	3	25	0.340269	0.800729	Csa4G629470|Csa6G423980|Csa6G423480	csv:101231189|csv:101229213|csv:101222232|	101231189|101229213|101222232|	http://www.genome.jp/kegg-bin/show_pathway?csv00950/csv:101229213%09red/csv:101222232%09red/csv:101231189%09red
Metabolic pathways	KEGG PATHWAY	csv01100	204	2496	0.345268	0.800729	Csa1G528590|Csa6G117710|Csa7G009190|Csa5G611700|Csa3G603580|Csa6G448730|Csa1G050360|Csa3G149320|Csa4G629470|Csa2G167190|Csa3G047820|Csa2G336130|Csa3G017020|Csa3G019340|Csa5G322500|Csa1G108800|Csa7G387180|Csa3G710200|Csa1G614130|Csa6G423980|Csa5G613510|Csa7G058540|Csa6G017060|Csa2G037230|Csa3G823050|Csa3G638540|Csa6G483300|Csa6G448720|Csa1G014400|Csa3G164470|Csa1G615730|Csa5G149880|Csa2G351700|Csa…	csv:101213311|csv:101213994|csv:101204791|csv:101211316|csv:101213224|csv:101205445|csv:101214523|csv:101207461|csv:101231189|csv:101216744|csv:101210545|csv:101212817|csv:101213455|csv:101222043|csv:101211461|csv:101220141|csv:101221786|csv:101215427|csv:101214065|csv:101229213|csv:101206975|csv:101221364|csv:101210090|csv:101214888|csv:101207316|csv:101220055|csv:101204396|csv:101205446|csv:101…	101213311|101213994|101204791|101211316|101213224|101205445|101214523|101207461|101231189|101216744|101210545|101212817|101213455|101222043|101211461|101220141|101221786|101215427|101214065|101229213|101206975|101221364|101210090|101214888|101207316|101220055|101204396|101205446|101225817|101206829|101215511|101226999|101217746|101213614|101222240|101214004|101218046|101216977|101205815|101228565…	http://www.genome.jp/kegg-bin/show_pathway?csv01100/csv:101214888%09red/csv:101209658%09red/csv:101211989%09red/csv:101231189%09red/csv:101207933%09red/csv:101214545%09red/csv:101215287%09red/csv:101213455%09red/csv:101230757%09red/csv:101217416%09red/csv:101215687%09red/csv:101205436%09red/csv:101228426%09red/csv:101211977%09red/csv:101222690%09red/csv:101213038%09red/csv:101211752%09red/csv:101…
Tyrosine metabolism	KEGG PATHWAY	csv00350	5	49	0.36581	0.815373	Csa4G629470|Csa6G423980|Csa2G336130|Csa6G423480|Csa4G088750	csv:101231189|csv:101229213|csv:101212817|csv:101222232|csv:101231122|	101231189|101229213|101212817|101222232|101231122|	http://www.genome.jp/kegg-bin/show_pathway?csv00350/csv:101212817%09red/csv:101222232%09red/csv:101229213%09red/csv:101231122%09red/csv:101231189%09red
ABC transporters	KEGG PATHWAY	csv02010	3	27	0.381505	0.815373	Csa3G740250|Csa5G585950|Csa3G710840	csv:101220974|csv:101202823|csv:101211576|	101220974|101202823|101211576|	http://www.genome.jp/kegg-bin/show_pathway?csv02010/csv:101211576%09red/csv:101220974%09red/csv:101202823%09red
One carbon pool by folate	KEGG PATHWAY	csv00670	3	27	0.381505	0.815373	Csa4G377740|Csa1G062310|Csa6G497310	csv:101215287|csv:101209820|csv:101222240|	101215287|101209820|101222240|	http://www.genome.jp/kegg-bin/show_pathway?csv00670/csv:101215287%09red/csv:101209820%09red/csv:101222240%09red
Selenocompound metabolism	KEGG PATHWAY	csv00450	3	27	0.381505	0.815373	Csa3G872050|Csa3G822260|Csa3G002890	csv:101217416|csv:101229106|csv:101232070|	101217416|101229106|101232070|	http://www.genome.jp/kegg-bin/show_pathway?csv00450/csv:101217416%09red/csv:101232070%09red/csv:101229106%09red
Fatty acid metabolism	KEGG PATHWAY	csv01212	10	113	0.419708	0.879772	Csa2G415540|Csa3G019340|Csa2G129150|Csa4G006050|Csa7G031600|Csa3G731060|Csa3G149320|Csa4G192180|Csa5G207960|Csa3G133140	csv:101220632|csv:101222043|csv:101212301|csv:101225014|csv:101212158|csv:101209181|csv:101207461|csv:101221009|csv:101223135|csv:101217710|	101220632|101222043|101212301|101225014|101212158|101209181|101207461|101221009|101223135|101217710|	http://www.genome.jp/kegg-bin/show_pathway?csv01212/csv:101221009%09red/csv:101223135%09red/csv:101212301%09red/csv:101217710%09red/csv:101222043%09red/csv:101220632%09red/csv:101207461%09red/csv:101212158%09red/csv:101209181%09red/csv:101225014%09red
Nicotinate and nicotinamide metabolism	KEGG PATHWAY	csv00760	2	18	0.438916	0.892428	Csa1G615160|Csa5G524850	csv:101214308|csv:101205815|	101214308|101205815|	http://www.genome.jp/kegg-bin/show_pathway?csv00760/csv:101214308%09red/csv:101205815%09red
Tropane, piperidine and pyridine alkaloid biosynthesis	KEGG PATHWAY	csv00960	3	30	0.44212	0.892428	Csa4G629470|Csa6G423980|Csa6G423480	csv:101231189|csv:101229213|csv:101222232|	101231189|101229213|101222232|	http://www.genome.jp/kegg-bin/show_pathway?csv00960/csv:101229213%09red/csv:101222232%09red/csv:101231189%09red
Photosynthesis - antenna proteins	KEGG PATHWAY	csv00196	3	31	0.461825	0.904963	Csa6G057170|Csa3G099680|Csa6G522690	csv:101231164|csv:101223835|csv:101222687|	101231164|101223835|101222687|	http://www.genome.jp/kegg-bin/show_pathway?csv00196/csv:101222687%09red/csv:101223835%09red/csv:101231164%09red
Phenylalanine, tyrosine and tryptophan biosynthesis	KEGG PATHWAY	csv00400	6	68	0.464935	0.904963	Csa2G296130|Csa1G145980|Csa6G151110|Csa6G499800|Csa2G417830|Csa4G629470	csv:101229385|csv:101222151|csv:101205753|csv:101207177|csv:101217625|csv:101231189|	101229385|101222151|101205753|101207177|101217625|101231189|	http://www.genome.jp/kegg-bin/show_pathway?csv00400/csv:101222151%09red/csv:101231189%09red/csv:101229385%09red/csv:101205753%09red/csv:101207177%09red/csv:101217625%09red
Carotenoid biosynthesis	KEGG PATHWAY	csv00906	4	44	0.474939	0.907544	Csa4G064690|Csa4G269130|Csa4G056600|Csa1G435760	csv:101219505|csv:101219033|csv:101212508|csv:101204647|	101219505|101219033|101212508|101204647|	http://www.genome.jp/kegg-bin/show_pathway?csv00906/csv:101204647%09red/csv:101219505%09red/csv:101212508%09red/csv:101219033%09red
Glycolysis / Gluconeogenesis	KEGG PATHWAY	csv00010	13	157	0.484857	0.907544	Csa7G239010|Csa6G136020|Csa6G151120|Csa1G014400|Csa3G827250|Csa7G448900|Csa4G312240|Csa5G603950|Csa6G008590|Csa1G615730|Csa1G050250|Csa4G043870|Csa4G307360	csv:101229073|csv:101226860|csv:101205520|csv:101225817|csv:101226474|csv:101205436|csv:101217534|csv:101208773|csv:101214545|csv:101215511|csv:101226669|csv:101221321|csv:101211447|	101229073|101226860|101205520|101225817|101226474|101205436|101217534|101208773|101214545|101215511|101226669|101221321|101211447|	http://www.genome.jp/kegg-bin/show_pathway?csv00010/csv:101226474%09red/csv:101226669%09red/csv:101211447%09red/csv:101205436%09red/csv:101208773%09red/csv:101221321%09red/csv:101214545%09red/csv:101205520%09red/csv:101225817%09red/csv:101229073%09red/csv:101215511%09red/csv:101217534%09red/csv:101226860%09red
Diterpenoid biosynthesis	KEGG PATHWAY	csv00904	4	45	0.491239	0.907544	Csa1G439830|Csa2G379300|Csa3G903530|Csa7G434970	csv:101214915|csv:101222627|csv:101228426|csv:101223012|	101214915|101222627|101228426|101223012|	http://www.genome.jp/kegg-bin/show_pathway?csv00904/csv:101223012%09red/csv:101222627%09red/csv:101228426%09red/csv:101214915%09red
Ascorbate and aldarate metabolism	KEGG PATHWAY	csv00053	5	60	0.526592	0.956642	Csa3G434960|Csa7G448900|Csa3G775240|Csa1G604040|Csa4G043870	csv:101228253|csv:101205436|csv:101207933|csv:101215231|csv:101221321|	101228253|101205436|101207933|101215231|101221321|	http://www.genome.jp/kegg-bin/show_pathway?csv00053/csv:101228253%09red/csv:101207933%09red/csv:101221321%09red/csv:101205436%09red/csv:101215231%09red
Other types of O-glycan biosynthesis	KEGG PATHWAY	csv00514	1	10	0.568818	1	Csa4G411390	csv:101213872|	101213872|	http://www.genome.jp/kegg-bin/show_pathway?csv00514/csv:101213872%09red
Glycosphingolipid biosynthesis - globo series	KEGG PATHWAY	csv00603	1	11	0.600577	1	Csa5G580630	csv:101211924|	101211924|	http://www.genome.jp/kegg-bin/show_pathway?csv00603/csv:101211924%09red
Non-homologous end-joining	KEGG PATHWAY	csv03450	1	11	0.600577	1	Csa7G064000	csv:101221362|	101221362|	http://www.genome.jp/kegg-bin/show_pathway?csv03450/csv:101221362%09red
Sesquiterpenoid and triterpenoid biosynthesis	KEGG PATHWAY	csv00909	2	25	0.60103	1	Csa2G353480|Novel00126	csv:101213038|csv:101223618|	101213038|101223618|	http://www.genome.jp/kegg-bin/show_pathway?csv00909/csv:101223618%09red/csv:101213038%09red
Cutin, suberine and wax biosynthesis	KEGG PATHWAY	csv00073	2	25	0.60103	1	Csa6G079750|Csa3G848300	csv:101222843|csv:101205454|	101222843|101205454|	http://www.genome.jp/kegg-bin/show_pathway?csv00073/csv:101205454%09red/csv:101222843%09red
Pentose phosphate pathway	KEGG PATHWAY	csv00030	5	66	0.606498	1	Csa6G077460|Csa5G642720|Csa5G571460|Csa4G307360|Csa5G611700	csv:101211955|csv:101226257|csv:101212988|csv:101211447|csv:101211316|	101211955|101226257|101212988|101211447|101211316|	http://www.genome.jp/kegg-bin/show_pathway?csv00030/csv:101211955%09red/csv:101211316%09red/csv:101226257%09red/csv:101211447%09red/csv:101212988%09red
Glycerophospholipid metabolism	KEGG PATHWAY	csv00564	8	110	0.646861	1	Csa7G412840|Csa7G058540|Csa2G058110|Csa4G293170|Csa3G732400|Csa7G291720|Novel00046|Csa4G004970	csv:101218362|csv:101221364|csv:101217776|csv:101210022|csv:101214865|csv:101228565|csv:101220267|csv:101215246|	101218362|101221364|101217776|101210022|101214865|101228565|101220267|101215246|	http://www.genome.jp/kegg-bin/show_pathway?csv00564/csv:101220267%09red/csv:101214865%09red/csv:101228565%09red/csv:101215246%09red/csv:101217776%09red/csv:101218362%09red/csv:101210022%09red/csv:101221364%09red
Limonene and pinene degradation	KEGG PATHWAY	csv00903	1	13	0.657255	1	Csa4G043870	csv:101221321|	101221321|	http://www.genome.jp/kegg-bin/show_pathway?csv00903/csv:101221321%09red
Inositol phosphate metabolism	KEGG PATHWAY	csv00562	5	72	0.678069	1	Csa3G824810|Csa3G434960|Csa7G066830|Csa7G206930|Csa4G031000	csv:101222304|csv:101228253|csv:101204924|csv:101202759|csv:101227056|	101222304|101228253|101204924|101202759|101227056|	http://www.genome.jp/kegg-bin/show_pathway?csv00562/csv:101222304%09red/csv:101228253%09red/csv:101202759%09red/csv:101204924%09red/csv:101227056%09red
Protein processing in endoplasmic reticulum	KEGG PATHWAY	csv04141	19	261	0.678153	1	Csa4G303700|Csa2G011510|Csa2G070310|Csa4G637750|Csa1G294620|Csa5G197120|Csa7G073540|Csa5G151540|Csa1G004250|Csa4G022960|Csa7G072770|Csa4G005000|Csa5G138480|Csa6G128040|Csa3G183950|Csa5G198120|Csa5G591720|Csa2G360850|Csa3G595190	csv:101231552|csv:101221843|csv:101215564|csv:101227947|csv:101222431|csv:101226001|csv:101230796|csv:101228054|csv:101205889|csv:101231319|csv:101220889|csv:101210969|csv:101210285|csv:101223297|csv:101223769|csv:101224286|csv:101224186|csv:101221027|csv:101225758|	101231552|101221843|101215564|101227947|101222431|101226001|101230796|101228054|101205889|101231319|101220889|101210969|101210285|101223297|101223769|101224286|101224186|101221027|101225758|	http://www.genome.jp/kegg-bin/show_pathway?csv04141/csv:101228054%09red/csv:101210285%09red/csv:101224186%09red/csv:101223769%09red/csv:101223297%09red/csv:101221843%09red/csv:101227947%09red/csv:101210969%09red/csv:101224286%09red/csv:101225758%09red/csv:101231552%09red/csv:101231319%09red/csv:101222431%09red/csv:101215564%09red/csv:101230796%09red/csv:101205889%09red/csv:101226001%09red/csv:101…
Zeatin biosynthesis	KEGG PATHWAY	csv00908	2	30	0.693529	1	Csa4G343590|Csa4G415920	csv:101222887|csv:101209480|	101222887|101209480|	http://www.genome.jp/kegg-bin/show_pathway?csv00908/csv:101209480%09red/csv:101222887%09red
Photosynthesis	KEGG PATHWAY	csv00195	7	103	0.708721	1	Csa3G222790|Csa6G525340|Csa3G875430|Csa6G525450|Csa1G163160|Csa1G168350|Csa6G483300	csv:101204727|csv:101223625|csv:101211484|csv:101229880|csv:101227930|csv:101209111|csv:101204396|	101204727|101223625|101211484|101229880|101227930|101209111|101204396|	http://www.genome.jp/kegg-bin/show_pathway?csv00195/csv:101229880%09red/csv:101227930%09red/csv:101204727%09red/csv:101209111%09red/csv:101211484%09red/csv:101204396%09red/csv:101223625%09red
Regulation of autophagy	KEGG PATHWAY	csv04140	3	46	0.709669	1	Csa4G652020|Csa4G269780|CsaUNG031630	csv:101213773|csv:101221173|csv:101218600|	101213773|101221173|101218600|	http://www.genome.jp/kegg-bin/show_pathway?csv04140/csv:101213773%09red/csv:101218600%09red/csv:101221173%09red
Glutathione metabolism	KEGG PATHWAY	csv00480	7	104	0.717576	1	Csa3G133380|Csa5G642720|Csa4G303680|Csa3G126940|Csa4G303690|Csa4G304750|Csa4G304250	csv:101227857|csv:101226257|csv:101231986|csv:101227326|csv:101231765|csv:101214992|csv:101213782|	101227857|101226257|101231986|101227326|101231765|101214992|101213782|	http://www.genome.jp/kegg-bin/show_pathway?csv00480/csv:101213782%09red/csv:101227326%09red/csv:101227857%09red/csv:101214992%09red/csv:101231765%09red/csv:101231986%09red/csv:101226257%09red
Sulfur relay system	KEGG PATHWAY	csv04122	1	16	0.727567	1	Csa7G429610	csv:101220174|	101220174|	http://www.genome.jp/kegg-bin/show_pathway?csv04122/csv:101220174%09red
Fatty acid biosynthesis	KEGG PATHWAY	csv00061	3	49	0.747063	1	Csa7G031600|Csa4G192180|Csa3G149320	csv:101212158|csv:101221009|csv:101207461|	101212158|101221009|101207461|	http://www.genome.jp/kegg-bin/show_pathway?csv00061/csv:101221009%09red/csv:101207461%09red/csv:101212158%09red
Arachidonic acid metabolism	KEGG PATHWAY	csv00590	1	17	0.747642	1	Csa6G052700	csv:101218135|	101218135|	http://www.genome.jp/kegg-bin/show_pathway?csv00590/csv:101218135%09red
Thiamine metabolism	KEGG PATHWAY	csv00730	1	17	0.747642	1	Csa1G528590	csv:101213311|	101213311|	http://www.genome.jp/kegg-bin/show_pathway?csv00730/csv:101213311%09red
Pentose and glucuronate interconversions	KEGG PATHWAY	csv00040	9	138	0.762937	1	Csa5G622520|Csa7G405820|Csa7G447990|Csa3G133180|Csa4G043870|Csa2G350210|Csa2G049960|Csa7G343870|Csa7G343850	csv:101205739|csv:101205321|csv:101212388|csv:101218188|csv:101221321|csv:101208076|csv:101209640|csv:101220821|csv:101221055|	101205739|101205321|101212388|101218188|101221321|101208076|101209640|101220821|101221055|	http://www.genome.jp/kegg-bin/show_pathway?csv00040/csv:101221321%09red/csv:101218188%09red/csv:101208076%09red/csv:101220821%09red/csv:101212388%09red/csv:101205321%09red/csv:101209640%09red/csv:101205739%09red/csv:101221055%09red
Porphyrin and chlorophyll metabolism	KEGG PATHWAY	csv00860	3	51	0.769784	1	Csa2G372750|Csa2G224250|Csa1G250130	csv:101220615|csv:101224427|csv:101222986|	101220615|101224427|101222986|	http://www.genome.jp/kegg-bin/show_pathway?csv00860/csv:101222986%09red/csv:101224427%09red/csv:101220615%09red
Pyruvate metabolism	KEGG PATHWAY	csv00620	7	111	0.774401	1	Csa3G363180|Csa7G448900|Csa7G048110|Csa3G076020|Csa4G043870|Csa5G603950|Csa1G050360	csv:101224798|csv:101205436|csv:101208202|csv:101203268|csv:101221321|csv:101208773|csv:101214523|	101224798|101205436|101208202|101203268|101221321|101208773|101214523|	http://www.genome.jp/kegg-bin/show_pathway?csv00620/csv:101221321%09red/csv:101205436%09red/csv:101208773%09red/csv:101208202%09red/csv:101214523%09red/csv:101224798%09red/csv:101203268%09red
Phosphatidylinositol signaling system	KEGG PATHWAY	csv04070	4	67	0.776733	1	Csa2G058110|Csa5G636620|Csa7G206930|Csa3G824810	csv:101217776|csv:101211506|csv:101202759|csv:101222304|	101217776|101211506|101202759|101222304|	http://www.genome.jp/kegg-bin/show_pathway?csv04070/csv:101211506%09red/csv:101217776%09red/csv:101222304%09red/csv:101202759%09red
Biotin metabolism	KEGG PATHWAY	csv00780	1	19	0.783466	1	Csa4G192180	csv:101221009|	101221009|	http://www.genome.jp/kegg-bin/show_pathway?csv00780/csv:101221009%09red
Phagosome	KEGG PATHWAY	csv04145	6	102	0.815494	1	Csa2G368830|Csa1G294620|Csa3G732650|Csa7G206930|Csa4G000580|Novel00250	csv:101204817|csv:101222431|csv:101218443|csv:101202759|csv:101221020|csv:101208227|	101204817|101222431|101218443|101202759|101221020|101208227|	http://www.genome.jp/kegg-bin/show_pathway?csv04145/csv:101221020%09red/csv:101222431%09red/csv:101208227%09red/csv:101218443%09red/csv:101202759%09red/csv:101204817%09red
Circadian rhythm - plant	KEGG PATHWAY	csv04712	2	43	0.853751	1	Csa2G035330|Csa1G651710	csv:101216738|csv:101207969|	101216738|101207969|	http://www.genome.jp/kegg-bin/show_pathway?csv04712/csv:101207969%09red/csv:101216738%09red
Citrate cycle (TCA cycle)	KEGG PATHWAY	csv00020	3	61	0.859497	1	Csa5G603950|Csa6G362950|Csa5G512860	csv:101208773|csv:101231212|csv:101208883|	101208773|101231212|101208883|	http://www.genome.jp/kegg-bin/show_pathway?csv00020/csv:101208773%09red/csv:101231212%09red/csv:101208883%09red
Other glycan degradation	KEGG PATHWAY	csv00511	1	27	0.882655	1	Csa5G011660	csv:101212019|	101212019|	http://www.genome.jp/kegg-bin/show_pathway?csv00511/csv:101212019%09red
Propanoate metabolism	KEGG PATHWAY	csv00640	1	29	0.899325	1	Csa7G066830	csv:101204924|	101204924|	http://www.genome.jp/kegg-bin/show_pathway?csv00640/csv:101204924%09red
Folate biosynthesis	KEGG PATHWAY	csv00790	1	29	0.899325	1	Csa7G429610	csv:101220174|	101220174|	http://www.genome.jp/kegg-bin/show_pathway?csv00790/csv:101220174%09red
Pantothenate and CoA biosynthesis	KEGG PATHWAY	csv00770	1	29	0.899325	1	Csa2G352930	csv:101214004|	101214004|	http://www.genome.jp/kegg-bin/show_pathway?csv00770/csv:101214004%09red
Mismatch repair	KEGG PATHWAY	csv03430	2	50	0.90408	1	Csa1G013800|Csa5G614640	csv:101208545|csv:101229844|	101208545|101229844|	http://www.genome.jp/kegg-bin/show_pathway?csv03430/csv:101229844%09red/csv:101208545%09red
SNARE interactions in vesicular transport	KEGG PATHWAY	csv04130	2	53	0.920249	1	Csa3G782680|Novel00250	csv:101208931|csv:101208227|	101208931|101208227|	http://www.genome.jp/kegg-bin/show_pathway?csv04130/csv:101208931%09red/csv:101208227%09red
Amino sugar and nucleotide sugar metabolism	KEGG PATHWAY	csv00520	8	158	0.928457	1	Csa3G300600|Csa5G167200|Csa3G035870|Csa2G037230|Csa5G172290|Csa3G149890|Csa6G008750|Csa1G615730	csv:101223130|csv:101220595|csv:101210949|csv:101214888|csv:101212568|csv:101208605|csv:101229347|csv:101215511|	101223130|101220595|101210949|101214888|101212568|101208605|101229347|101215511|	http://www.genome.jp/kegg-bin/show_pathway?csv00520/csv:101210949%09red/csv:101212568%09red/csv:101229347%09red/csv:101208605%09red/csv:101220595%09red/csv:101223130%09red/csv:101214888%09red/csv:101215511%09red
Linoleic acid metabolism	KEGG PATHWAY	csv00591	1	35	0.936431	1	Csa4G288610	csv:101228070|	101228070|	http://www.genome.jp/kegg-bin/show_pathway?csv00591/csv:101228070%09red
Ether lipid metabolism	KEGG PATHWAY	csv00565	1	37	0.945466	1	Csa4G004970	csv:101215246|	101215246|	http://www.genome.jp/kegg-bin/show_pathway?csv00565/csv:101215246%09red
N-Glycan biosynthesis	KEGG PATHWAY	csv00510	2	60	0.948553	1	Csa5G598080|Csa5G522970	csv:101222690|csv:101220682|	101222690|101220682|	http://www.genome.jp/kegg-bin/show_pathway?csv00510/csv:101222690%09red/csv:101220682%09red
Homologous recombination	KEGG PATHWAY	csv03440	2	63	0.957487	1	Csa1G013800|Csa5G614640	csv:101208545|csv:101229844|	101208545|101229844|	http://www.genome.jp/kegg-bin/show_pathway?csv03440/csv:101229844%09red/csv:101208545%09red
Nucleotide excision repair	KEGG PATHWAY	csv03420	2	72	0.976223	1	Csa1G013800|Csa5G614640	csv:101208545|csv:101229844|	101208545|101229844|	http://www.genome.jp/kegg-bin/show_pathway?csv03420/csv:101229844%09red/csv:101208545%09red
RNA degradation	KEGG PATHWAY	csv03018	4	133	0.992267	1	Csa6G425790|Csa1G014400|Csa1G168920|Csa1G181360	csv:101230887|csv:101225817|csv:101210423|csv:101230738|	101230887|101225817|101210423|101230738|	http://www.genome.jp/kegg-bin/show_pathway?csv03018/csv:101230738%09red/csv:101210423%09red/csv:101225817%09red/csv:101230887%09red
Protein export	KEGG PATHWAY	csv03060	1	67	0.994545	1	Csa1G294620	csv:101222431|	101222431|	http://www.genome.jp/kegg-bin/show_pathway?csv03060/csv:101222431%09red
Ubiquitin mediated proteolysis	KEGG PATHWAY	csv04120	4	145	0.99614	1	Csa4G285710|Csa1G045930|Csa5G151540|Csa6G344280	csv:101213438|csv:101221105|csv:101228054|csv:101224575|	101213438|101221105|101228054|101224575|	http://www.genome.jp/kegg-bin/show_pathway?csv04120/csv:101213438%09red/csv:101228054%09red/csv:101224575%09red/csv:101221105%09red
Purine metabolism	KEGG PATHWAY	csv00230	7	208	0.996677	1	Csa2G252070|Csa5G613510|Csa1G613540|Csa6G405970|Csa3G872050|Csa5G647410|Csa2G354800	csv:101203840|csv:101206975|csv:101211977|csv:101203595|csv:101217416|csv:101203146|csv:101208231|	101203840|101206975|101211977|101203595|101217416|101203146|101208231|	http://www.genome.jp/kegg-bin/show_pathway?csv00230/csv:101203840%09red/csv:101203146%09red/csv:101206975%09red/csv:101208231%09red/csv:101203595%09red/csv:101217416%09red/csv:101211977%09red
Endocytosis	KEGG PATHWAY	csv04144	3	149	0.999265	1	Csa2G070310|Novel00087|Csa4G004970	csv:101215564|csv:101214261|csv:101215246|	101215564|101214261|101215246|	http://www.genome.jp/kegg-bin/show_pathway?csv04144/csv:101215564%09red/csv:101214261%09red/csv:101215246%09red
Spliceosome	KEGG PATHWAY	csv03040	4	208	0.999921	1	Csa1G569330|Csa2G070310|Csa1G145960|Csa5G175720	csv:101223011|csv:101215564|csv:101221685|csv:101229537|	101223011|101215564|101221685|101229537|	http://www.genome.jp/kegg-bin/show_pathway?csv03040/csv:101223011%09red/csv:101215564%09red/csv:101221685%09red/csv:101229537%09red
Pyrimidine metabolism	KEGG PATHWAY	csv00240	2	160	0.999945	1	Csa7G253200|Csa5G647410	csv:101213614|csv:101203146|	101213614|101203146|	http://www.genome.jp/kegg-bin/show_pathway?csv00240/csv:101213614%09red/csv:101203146%09red
Oxidative phosphorylation	KEGG PATHWAY	csv00190	4	228	0.999978	1	Csa5G635370|Novel00096|Csa1G008520|Csa1G045600	csv:101211115|csv:101221564|csv:101217264|csv:101214920|	101211115|101221564|101217264|101214920|	http://www.genome.jp/kegg-bin/show_pathway?csv00190/csv:101221564%09red/csv:101211115%09red/csv:101217264%09red/csv:101214920%09red
mRNA surveillance pathway	KEGG PATHWAY	csv03015	1	140	0.99998	1	Csa1G074930	csv:101223054|	101223054|	http://www.genome.jp/kegg-bin/show_pathway?csv03015/csv:101223054%09red
RNA transport	KEGG PATHWAY	csv03013	1	196	1	1	Csa5G495950	csv:101220517|	101220517|	http://www.genome.jp/kegg-bin/show_pathway?csv03013/csv:101220517%09red
Ribosome	KEGG PATHWAY	csv03010	1	439	1	1	Csa6G024430	csv:101209824|	101209824|	http://www.genome.jp/kegg-bin/show_pathway?csv03010/csv:101209824%09red
--------------------
#Term	Database	ID	Input number	Background number	P-Value	Corrected P-Value	Input	KEGG_ID/KO	Entrez_ID	Hyperlink
--------------------
#Term	Database	ID	Input number	Background number	P-Value	Corrected P-Value	Input	KEGG_ID/KO	Entrez_ID	Hyperlink
--------------------

## Sheet: PhyxChr vs Con DEG_KEGG_
##Databases: KEGG PATHWAY
##Statistical test method: hypergeometric test / Fisher's exact test
##FDR correction method: Benjamini and Hochberg
#Term	Database	ID	Input number	Background number	P-Value	Corrected P-Value	Input	KEGG_ID/KO	Entrez_ID	Hyperlink
Circadian rhythm - plant	KEGG PATHWAY	csv04712	18	43	0.000479771	0.0580523	Csa7G452030|Csa5G150990|Csa2G381650|Csa4G293050|Csa7G031720|Csa3G889670|Csa7G293230|Csa6G161200|Csa1G699620|Csa6G055360|Csa2G035330|Csa2G352370|Csa1G038380|Csa7G293730|Csa5G139010|Csa6G095910|Csa3G914590|Csa7G293740	csv:101208149|csv:101211350|csv:101218051|csv:101229330|csv:101211915|csv:101224628|csv:101216952|csv:101210608|csv:101203654|csv:101220984|csv:101216738|csv:101203735|csv:101220107|csv:101216952|csv:101209788|csv:101214878|csv:101214341|csv:101216952|	101208149|101211350|101218051|101229330|101211915|101224628|101216952|101210608|101203654|101220984|101216738|101203735|101220107|101216952|101209788|101214878|101214341|101216952|	http://www.genome.jp/kegg-bin/show_pathway?csv04712/csv:101208149%09red/csv:101224628%09red/csv:101218051%09red/csv:101203654%09red/csv:101210608%09red/csv:101203735%09red/csv:101211350%09red/csv:101214878%09red/csv:101216952%09red/csv:101211915%09red/csv:101214341%09red/csv:101209788%09red/csv:101220107%09red/csv:101220984%09red/csv:101216738%09red/csv:101229330%09red
Carotenoid biosynthesis	KEGG PATHWAY	csv00906	17	44	0.00138427	0.0704243	Csa4G269130|Csa4G269120|Csa5G453160|Csa3G115620|Csa2G357280|Csa5G152820|Csa4G056640|Csa4G063980|Csa3G183920|Csa4G218350|Csa5G320430|Csa4G064690|Csa2G277050|Csa6G106700|Csa3G784380|Csa6G448700|Csa7G073680	csv:101219033|csv:101224570|csv:101219413|csv:101215492|csv:101213916|csv:101231983|csv:101220226|csv:101223326|csv:101212140|csv:101207778|csv:101206471|csv:101219505|csv:101212903|csv:101218773|csv:101212850|csv:101204961|csv:101219389|	101219033|101224570|101219413|101215492|101213916|101231983|101220226|101223326|101212140|101207778|101206471|101219505|101212903|101218773|101212850|101204961|101219389|	http://www.genome.jp/kegg-bin/show_pathway?csv00906/csv:101219389%09red/csv:101212140%09red/csv:101206471%09red/csv:101212850%09red/csv:101219413%09red/csv:101213916%09red/csv:101219033%09red/csv:101223326%09red/csv:101219505%09red/csv:101220226%09red/csv:101215492%09red/csv:101231983%09red/csv:101218773%09red/csv:101204961%09red/csv:101212903%09red/csv:101207778%09red/csv:101224570%09red
Glycerolipid metabolism	KEGG PATHWAY	csv00561	22	68	0.00198996	0.0704243	Csa3G099600|Csa7G007830|Csa1G030620|Csa3G732400|Csa4G358630|Csa6G476710|Csa5G580630|Csa7G432280|Csa5G182690|Csa7G024000|Csa6G123470|Csa4G293170|Csa4G361890|Csa3G607650|Csa1G005520|Csa3G900970|Csa4G646090|Csa4G291370|Csa4G361880|Csa1G039060|Csa6G004540|Csa6G423450	csv:101208743|csv:101214993|csv:101209672|csv:101214865|csv:101220288|csv:101225639|csv:101211924|csv:101210335|csv:101205124|csv:101229151|csv:101210099|csv:101210022|csv:101224400|csv:101226681|csv:101209430|csv:101213494|csv:101208634|csv:101205263|csv:101224178|csv:101230116|csv:101221758|csv:101214551|	101208743|101214993|101209672|101214865|101220288|101225639|101211924|101210335|101205124|101229151|101210099|101210022|101224400|101226681|101209430|101213494|101208634|101205263|101224178|101230116|101221758|101214551|	http://www.genome.jp/kegg-bin/show_pathway?csv00561/csv:101214865%09red/csv:101205124%09red/csv:101226681%09red/csv:101211924%09red/csv:101229151%09red/csv:101210022%09red/csv:101230116%09red/csv:101205263%09red/csv:101221758%09red/csv:101209672%09red/csv:101208634%09red/csv:101225639%09red/csv:101224400%09red/csv:101224178%09red/csv:101220288%09red/csv:101210099%09red/csv:101214993%09red/csv:101…
Biosynthesis of secondary metabolites	KEGG PATHWAY	csv01110	224	1238	0.00232808	0.0704243	Csa3G812230|Csa7G322060|Csa1G612880|Csa2G361600|Csa6G385090|Novel00557|Novel00554|Csa2G048330|Csa3G603580|Csa2G011460|Csa6G497350|Csa4G629470|Csa3G904100|Csa1G046170|Csa2G006110|Csa5G612840|Csa6G504560|Csa6G445240|Csa5G158570|Csa6G507310|Csa1G001520|Csa2G055040|Csa7G069710|Csa6G007980|Csa5G478620|Csa3G710200|Csa4G310720|Csa6G490230|Csa6G376260|Csa2G248740|Csa4G269120|Csa4G052620|Csa1G025780|Csa5G…	csv:101232517|csv:101206036|csv:101229333|csv:101230936|csv:101230065|csv:101216883|csv:101227266|csv:101210868|csv:101213224|csv:101222554|csv:101222715|csv:101231189|csv:101223065|csv:101204330|csv:101223173|csv:101209588|csv:101204648|csv:101217907|csv:101213059|csv:101217715|csv:101213339|csv:101212821|csv:101210582|csv:101213181|csv:101231068|csv:101215427|csv:101230385|csv:101228067|csv:101…	101232517|101206036|101229333|101230936|101230065|101216883|101227266|101210868|101213224|101222554|101222715|101231189|101223065|101204330|101223173|101209588|101204648|101217907|101213059|101217715|101213339|101212821|101210582|101213181|101231068|101215427|101230385|101228067|101202798|101208417|101224570|101209558|101204835|101226260|101227374|101205909|101231893|101222110|101205337|101223133…	http://www.genome.jp/kegg-bin/show_pathway?csv01110/csv:101217715%09red/csv:101222189%09red/csv:101227659%09red/csv:101227873%09red/csv:101231189%09red/csv:101222467%09red/csv:101215287%09red/csv:101218156%09red/csv:101217499%09red/csv:101205820%09red/csv:101202798%09red/csv:101212803%09red/csv:101231068%09red/csv:101225858%09red/csv:101212230%09red/csv:101219531%09red/csv:101229335%09red/csv:101…
DNA replication	KEGG PATHWAY	csv03030	20	63	0.00371949	0.0900116	Csa1G561390|Csa6G538780|Csa5G614640|Csa4G361280|Csa6G188070|Csa1G013800|Csa6G426950|Csa1G434690|Csa6G522780|Csa6G151760|Csa4G626090|Csa7G004140|Csa5G647410|Csa6G502800|Csa3G722880|Csa1G039840|Csa1G435200|Csa6G476130|Csa2G009300|Csa7G407650	csv:101204273|csv:101223575|csv:101229844|csv:101221224|csv:101208473|csv:101208545|csv:101204361|csv:101207444|csv:101210889|csv:101208568|csv:101228942|csv:101211850|csv:101203146|csv:101218071|csv:101219546|csv:101226281|csv:101229011|csv:101219332|csv:101227426|csv:101219064|	101204273|101223575|101229844|101221224|101208473|101208545|101204361|101207444|101210889|101208568|101228942|101211850|101203146|101218071|101219546|101226281|101229011|101219332|101227426|101219064|	http://www.genome.jp/kegg-bin/show_pathway?csv03030/csv:101228942%09red/csv:101229844%09red/csv:101229011%09red/csv:101223575%09red/csv:101207444%09red/csv:101204361%09red/csv:101227426%09red/csv:101204273%09red/csv:101211850%09red/csv:101210889%09red/csv:101226281%09red/csv:101218071%09red/csv:101221224%09red/csv:101208568%09red/csv:101203146%09red/csv:101208545%09red/csv:101219332%09red/csv:101…
Glycerophospholipid metabolism	KEGG PATHWAY	csv00564	28	110	0.00929885	0.187527	Csa3G099600|Csa7G058530|Csa3G732400|Csa1G039220|Csa7G024000|Novel00046|Csa6G123470|Csa5G182690|Csa3G124860|Csa4G651930|Csa5G608060|Csa5G162610|Csa1G042800|Csa2G361470|Csa1G025050|Csa7G291720|Csa4G293170|Csa3G710860|Csa1G047440|Csa3G900970|Csa6G511760|Csa4G358630|Csa1G039060|Csa6G014730|Csa2G380030|Csa6G004540|Csa6G423450|Csa4G004970	csv:101208743|csv:101227546|csv:101214865|csv:101222932|csv:101229151|csv:101220267|csv:101210099|csv:101205124|csv:101209255|csv:101213538|csv:101225379|csv:101203358|csv:101219872|csv:101218421|csv:101220498|csv:101228565|csv:101210022|csv:101218126|csv:101207870|csv:101213494|csv:101230069|csv:101220288|csv:101230116|csv:101212778|csv:101218992|csv:101221758|csv:101214551|csv:101215246|	101208743|101227546|101214865|101222932|101229151|101220267|101210099|101205124|101209255|101213538|101225379|101203358|101219872|101218421|101220498|101228565|101210022|101218126|101207870|101213494|101230069|101220288|101230116|101212778|101218992|101221758|101214551|101215246|	http://www.genome.jp/kegg-bin/show_pathway?csv00564/csv:101214865%09red/csv:101207870%09red/csv:101205124%09red/csv:101229151%09red/csv:101218421%09red/csv:101225379%09red/csv:101203358%09red/csv:101230116%09red/csv:101220267%09red/csv:101227546%09red/csv:101221758%09red/csv:101210022%09red/csv:101209255%09red/csv:101222932%09red/csv:101213538%09red/csv:101220498%09red/csv:101220288%09red/csv:101…
2-Oxocarboxylic acid metabolism	KEGG PATHWAY	csv01210	16	63	0.0426753	0.710446	Csa3G133100|Csa2G382520|Csa5G021870|Csa4G006270|Csa6G507310|Csa1G001520|Csa6G496970|Csa7G051370|Csa1G005600|Csa6G495740|Csa5G346550|Csa3G734910|Csa1G096620|Csa6G495730|Csa2G379190|Csa3G363180	csv:101217323|csv:101225152|csv:101206329|csv:101229174|csv:101217715|csv:101213339|csv:101217437|csv:101213336|csv:101210170|csv:101223180|csv:101211294|csv:101222699|csv:101217299|csv:101226596|csv:101203871|csv:101224798|	101217323|101225152|101206329|101229174|101217715|101213339|101217437|101213336|101210170|101223180|101211294|101222699|101217299|101226596|101203871|101224798|	http://www.genome.jp/kegg-bin/show_pathway?csv01210/csv:101217715%09red/csv:101226596%09red/csv:101213339%09red/csv:101217299%09red/csv:101203871%09red/csv:101224798%09red/csv:101213336%09red/csv:101211294%09red/csv:101225152%09red/csv:101210170%09red/csv:101229174%09red/csv:101223180%09red/csv:101217437%09red/csv:101222699%09red/csv:101217323%09red/csv:101206329%09red
Cutin, suberine and wax biosynthesis	KEGG PATHWAY	csv00073	8	25	0.0540582	0.710446	Csa6G079750|Csa1G001360|Csa5G153010|Csa7G451340|Csa1G528600|Csa6G151810|Csa6G004550|Csa7G198310	csv:101222843|csv:101210256|csv:101216733|csv:101209117|csv:101214516|csv:101209050|csv:101225067|csv:101232420|	101222843|101210256|101216733|101209117|101214516|101209050|101225067|101232420|	http://www.genome.jp/kegg-bin/show_pathway?csv00073/csv:101232420%09red/csv:101209117%09red/csv:101214516%09red/csv:101225067%09red/csv:101216733%09red/csv:101209050%09red/csv:101222843%09red/csv:101210256%09red
Phenylpropanoid biosynthesis	KEGG PATHWAY	csv00940	42	214	0.0580551	0.710446	Csa3G812230|Csa4G001720|Csa1G612880|Csa2G048330|Csa3G199580|Csa6G495000|Csa7G431440|Csa6G366400|Csa3G736970|Csa7G430230|Csa3G819790|Csa5G612840|Csa3G740270|Csa6G504560|Csa4G026850|Csa3G842070|Csa3G539670|Csa1G372010|Csa2G299950|Csa1G611290|Csa1G025780|Csa3G710200|Csa4G285770|Csa3G717870|Csa6G490230|Csa4G091880|Csa2G070210|Csa5G608020|Csa6G405960|Csa3G812220|Csa6G133710|Csa6G497350|Csa4G285790|Csa…	csv:101232517|csv:101226132|csv:101229333|csv:101210868|csv:101222395|csv:101206860|csv:101214857|csv:101202924|csv:101215428|csv:101218595|csv:101217257|csv:101209588|csv:101229976|csv:101204648|csv:101211442|csv:101223112|csv:101215782|csv:101230897|csv:101226147|csv:101214518|csv:101204835|csv:101215427|csv:101212230|csv:101219069|csv:101228067|csv:101204109|csv:101204747|csv:101224303|csv:101…	101232517|101226132|101229333|101210868|101222395|101206860|101214857|101202924|101215428|101218595|101217257|101209588|101229976|101204648|101211442|101223112|101215782|101230897|101226147|101214518|101204835|101215427|101212230|101219069|101228067|101204109|101204747|101224303|101206890|101225858|101221846|101222715|101211752|101208027|101205228|101213412|101228587|101217907|101229335|101218156…	http://www.genome.jp/kegg-bin/show_pathway?csv00940/csv:101213412%09red/csv:101211442%09red/csv:101229976%09red/csv:101232517%09red/csv:101226132%09red/csv:101218156%09red/csv:101215428%09red/csv:101215782%09red/csv:101204648%09red/csv:101214857%09red/csv:101209588%09red/csv:101206860%09red/csv:101212230%09red/csv:101217907%09red/csv:101215427%09red/csv:101219069%09red/csv:101217257%09red/csv:101…
Porphyrin and chlorophyll metabolism	KEGG PATHWAY	csv00860	13	51	0.0621725	0.710446	Csa2G285300|Csa2G224250|Csa3G682170|Csa1G328400|Csa6G385090|Csa1G002760|Csa1G132160|Csa1G000570|Csa2G285290|Csa2G372750|Csa4G165920|Csa1G250130|Csa6G007980	csv:101202861|csv:101224427|csv:101219749|csv:101214191|csv:101230065|csv:101231893|csv:101217499|csv:101206600|csv:101223133|csv:101220615|csv:101213619|csv:101222986|csv:101213181|	101202861|101224427|101219749|101214191|101230065|101231893|101217499|101206600|101223133|101220615|101213619|101222986|101213181|	http://www.genome.jp/kegg-bin/show_pathway?csv00860/csv:101219749%09red/csv:101230065%09red/csv:101223133%09red/csv:101217499%09red/csv:101202861%09red/csv:101206600%09red/csv:101213181%09red/csv:101222986%09red/csv:101220615%09red/csv:101214191%09red/csv:101231893%09red/csv:101224427%09red/csv:101213619%09red
Nicotinate and nicotinamide metabolism	KEGG PATHWAY	csv00760	6	18	0.0790363	0.710446	Csa5G128270|Csa3G734170|Csa2G279170|Csa1G047450|Csa5G128280|Csa5G524850	csv:101205253|csv:101205253|csv:101210953|csv:101208114|csv:101205253|csv:101205815|	101205253|101205253|101210953|101208114|101205253|101205815|	http://www.genome.jp/kegg-bin/show_pathway?csv00760/csv:101205253%09red/csv:101210953%09red/csv:101205815%09red/csv:101208114%09red
Fatty acid elongation	KEGG PATHWAY	csv00062	7	23	0.0824404	0.710446	Csa3G019340|Csa4G649640|Csa2G361600|Csa3G144140|Csa2G350250|Csa3G114430|Novel00157	csv:101222043|csv:101217359|csv:101230936|csv:101219531|csv:101230976|csv:101229253|csv:101203776|	101222043|101217359|101230936|101219531|101230976|101229253|101203776|	http://www.genome.jp/kegg-bin/show_pathway?csv00062/csv:101230976%09red/csv:101219531%09red/csv:101217359%09red/csv:101222043%09red/csv:101203776%09red/csv:101230936%09red/csv:101229253%09red
Valine, leucine and isoleucine biosynthesis	KEGG PATHWAY	csv00290	7	23	0.0824404	0.710446	Csa3G133100|Csa3G363180|Csa6G449240|Csa4G006270|Csa1G001520|Csa6G496970|Csa7G051370	csv:101217323|csv:101224798|csv:101205909|csv:101229174|csv:101213339|csv:101217437|csv:101213336|	101217323|101224798|101205909|101229174|101213339|101217437|101213336|	http://www.genome.jp/kegg-bin/show_pathway?csv00290/csv:101213339%09red/csv:101229174%09red/csv:101205909%09red/csv:101213336%09red/csv:101224798%09red/csv:101217437%09red/csv:101217323%09red
Pyruvate metabolism	KEGG PATHWAY	csv00620	23	111	0.0910948	0.710446	Csa5G223120|Csa6G308420|Csa3G150740|Csa4G361880|Csa1G574870|Csa5G603950|Csa5G577360|Csa6G497060|Csa5G622460|Csa4G438530|Csa4G000560|Csa6G513680|Csa4G092990|Csa3G363180|Csa7G048110|Csa4G361890|Csa4G009870|Csa3G253500|Csa6G073990|Csa1G005520|Csa5G396020|Csa4G291370|Csa7G284430	csv:101207676|csv:101209306|csv:101214608|csv:101224178|csv:101219936|csv:101208773|csv:101216256|csv:101225691|csv:101211170|csv:101226954|csv:101220786|csv:101224382|csv:101222930|csv:101224798|csv:101208202|csv:101224400|csv:101223148|csv:101203579|csv:101229465|csv:101209430|csv:101212380|csv:101205263|csv:101215151|	101207676|101209306|101214608|101224178|101219936|101208773|101216256|101225691|101211170|101226954|101220786|101224382|101222930|101224798|101208202|101224400|101223148|101203579|101229465|101209430|101212380|101205263|101215151|	http://www.genome.jp/kegg-bin/show_pathway?csv00620/csv:101224798%09red/csv:101205263%09red/csv:101208773%09red/csv:101208202%09red/csv:101222930%09red/csv:101224400%09red/csv:101224178%09red/csv:101216256%09red/csv:101225691%09red/csv:101220786%09red/csv:101226954%09red/csv:101212380%09red/csv:101209430%09red/csv:101224382%09red/csv:101229465%09red/csv:101207676%09red/csv:101215151%09red/csv:101…
Ubiquinone and other terpenoid-quinone biosynthesis	KEGG PATHWAY	csv00130	12	51	0.104988	0.710446	Csa2G228370|Csa3G740270|Csa2G059830|Csa2G070210|Csa7G430240|Csa2G048330|Csa6G133710|Csa3G653960|Csa7G064030|Csa3G710200|Csa4G629470|Csa7G430230	csv:101227374|csv:101229976|csv:101221791|csv:101204747|csv:101228587|csv:101210868|csv:101221846|csv:101222189|csv:101221829|csv:101215427|csv:101231189|csv:101218595|	101227374|101229976|101221791|101204747|101228587|101210868|101221846|101222189|101221829|101215427|101231189|101218595|	http://www.genome.jp/kegg-bin/show_pathway?csv00130/csv:101222189%09red/csv:101215427%09red/csv:101231189%09red/csv:101210868%09red/csv:101204747%09red/csv:101221829%09red/csv:101227374%09red/csv:101229976%09red/csv:101221791%09red/csv:101221846%09red/csv:101228587%09red/csv:101218595%09red
Glutathione metabolism	KEGG PATHWAY	csv00480	21	104	0.121351	0.710446	Csa5G346550|Csa4G304760|Csa6G486750|Csa3G597320|Csa6G000060|Csa4G064650|Csa4G443140|Csa4G303680|Csa4G013040|Csa4G050830|Novel00625|Csa1G005540|Csa4G651840|Csa3G604620|Csa5G154200|Csa4G064630|Csa4G064640|Csa4G304240|Csa1G033120|Csa4G304750|Csa4G304250	csv:101211294|csv:101219743|csv:101210105|csv:101222416|csv:101208623|csv:101226093|csv:101203574|csv:101231986|csv:101213073|csv:101206171|csv:101206809|csv:101210007|csv:101211107|csv:101212743|csv:101225149|csv:101225076|csv:101225306|csv:101214027|csv:101217019|csv:101214992|csv:101213782|	101211294|101219743|101210105|101222416|101208623|101226093|101203574|101231986|101213073|101206171|101206809|101210007|101211107|101212743|101225149|101225076|101225306|101214027|101217019|101214992|101213782|	http://www.genome.jp/kegg-bin/show_pathway?csv00480/csv:101213782%09red/csv:101217019%09red/csv:101231986%09red/csv:101206809%09red/csv:101225306%09red/csv:101212743%09red/csv:101219743%09red/csv:101213073%09red/csv:101203574%09red/csv:101206171%09red/csv:101211107%09red/csv:101214992%09red/csv:101222416%09red/csv:101225149%09red/csv:101210007%09red/csv:101214027%09red/csv:101211294%09red/csv:101…
Histidine metabolism	KEGG PATHWAY	csv00340	6	21	0.125182	0.710446	Csa1G005520|Csa1G537580|Csa4G361890|Csa4G291370|Csa4G361880|Csa7G212660	csv:101209430|csv:101209591|csv:101224400|csv:101205263|csv:101224178|csv:101205184|	101209430|101209591|101224400|101205263|101224178|101205184|	http://www.genome.jp/kegg-bin/show_pathway?csv00340/csv:101205263%09red/csv:101224400%09red/csv:101209591%09red/csv:101205184%09red/csv:101224178%09red/csv:101209430%09red
Monoterpenoid biosynthesis	KEGG PATHWAY	csv00902	3	7	0.128078	0.710446	Csa1G066570|Csa1G068570|Csa1G066560	csv:101221188|csv:101215070|csv:101221188|	101221188|101215070|101221188|	http://www.genome.jp/kegg-bin/show_pathway?csv00902/csv:101221188%09red/csv:101215070%09red
Other glycan degradation	KEGG PATHWAY	csv00511	7	27	0.139543	0.710446	Csa2G130670|Csa5G649350|Csa5G180280|Csa6G507060|Csa5G458290|Csa5G146320|Csa5G217140	csv:101228154|csv:101204709|csv:101202942|csv:101221354|csv:101222242|csv:101211186|csv:101227138|	101228154|101204709|101202942|101221354|101222242|101211186|101227138|	http://www.genome.jp/kegg-bin/show_pathway?csv00511/csv:101211186%09red/csv:101228154%09red/csv:101204709%09red/csv:101227138%09red/csv:101221354%09red/csv:101202942%09red/csv:101222242%09red
Vitamin B6 metabolism	KEGG PATHWAY	csv00750	5	17	0.144287	0.710446	Csa3G731200|Csa3G889990|Csa1G586800|Csa6G139790|Csa2G000280	csv:101212698|csv:101227569|csv:101207641|csv:101214331|csv:101226430|	101212698|101227569|101207641|101214331|101226430|	http://www.genome.jp/kegg-bin/show_pathway?csv00750/csv:101227569%09red/csv:101207641%09red/csv:101214331%09red/csv:101226430%09red/csv:101212698%09red
Arachidonic acid metabolism	KEGG PATHWAY	csv00590	5	17	0.144287	0.710446	Csa4G358630|Csa4G013040|Csa5G154200|Csa5G497060|Csa4G651840	csv:101220288|csv:101213073|csv:101225149|csv:101214564|csv:101211107|	101220288|101213073|101225149|101214564|101211107|	http://www.genome.jp/kegg-bin/show_pathway?csv00590/csv:101225149%09red/csv:101213073%09red/csv:101214564%09red/csv:101220288%09red/csv:101211107%09red
Steroid biosynthesis	KEGG PATHWAY	csv00100	10	44	0.150338	0.710446	Csa3G036480|Csa1G050410|Csa4G007710|Csa2G251460|Novel00554|Csa4G358630|Csa3G748820|Csa7G069710|Csa6G522820|Csa6G361340	csv:101231811|csv:101215719|csv:101205062|csv:101227146|csv:101227266|csv:101220288|csv:101207322|csv:101210582|csv:101221194|csv:101227073|	101231811|101215719|101205062|101227146|101227266|101220288|101207322|101210582|101221194|101227073|	http://www.genome.jp/kegg-bin/show_pathway?csv00100/csv:101220288%09red/csv:101205062%09red/csv:101207322%09red/csv:101227073%09red/csv:101231811%09red/csv:101215719%09red/csv:101210582%09red/csv:101227266%09red/csv:101221194%09red/csv:101227146%09red
Nitrogen metabolism	KEGG PATHWAY	csv00910	10	45	0.163851	0.710446	Csa1G120420|Csa4G025140|Csa3G603580|Csa1G120450|Csa5G599860|Csa3G207890|Csa5G383850|Csa6G446560|Csa1G120410|Csa3G776970	csv:101222229|csv:101227388|csv:101213224|csv:101232731|csv:101212365|csv:101217505|csv:101219000|csv:101202774|csv:101221989|csv:101209642|	101222229|101227388|101213224|101232731|101212365|101217505|101219000|101202774|101221989|101209642|	http://www.genome.jp/kegg-bin/show_pathway?csv00910/csv:101222229%09red/csv:101219000%09red/csv:101202774%09red/csv:101217505%09red/csv:101212365%09red/csv:101227388%09red/csv:101232731%09red/csv:101221989%09red/csv:101213224%09red/csv:101209642%09red
Galactose metabolism	KEGG PATHWAY	csv00052	15	74	0.166798	0.710446	Csa3G168910|Csa7G007830|Csa5G155470|Csa1G229500|Csa3G003980|Csa5G568310|Csa3G827250|Csa4G167980|Csa5G580630|Csa1G434140|Csa5G148720|Csa4G052620|Csa1G574970|Csa6G376260|Csa4G646140	csv:101231272|csv:101214993|csv:101227659|csv:101203037|csv:101209387|csv:101218883|csv:101226474|csv:101211538|csv:101211924|csv:101227672|csv:101205820|csv:101209558|csv:101227105|csv:101202798|csv:101215520|	101231272|101214993|101227659|101203037|101209387|101218883|101226474|101211538|101211924|101227672|101205820|101209558|101227105|101202798|101215520|	http://www.genome.jp/kegg-bin/show_pathway?csv00052/csv:101226474%09red/csv:101215520%09red/csv:101227659%09red/csv:101211538%09red/csv:101211924%09red/csv:101231272%09red/csv:101209387%09red/csv:101227672%09red/csv:101205820%09red/csv:101214993%09red/csv:101227105%09red/csv:101202798%09red/csv:101209558%09red/csv:101203037%09red/csv:101218883%09red
Limonene and pinene degradation	KEGG PATHWAY	csv00903	4	13	0.166991	0.710446	Csa1G005520|Csa4G291370|Csa4G361880|Csa4G361890	csv:101209430|csv:101205263|csv:101224178|csv:101224400|	101209430|101205263|101224178|101224400|	http://www.genome.jp/kegg-bin/show_pathway?csv00903/csv:101224400%09red/csv:101224178%09red/csv:101205263%09red/csv:101209430%09red
Lysine biosynthesis	KEGG PATHWAY	csv00300	4	13	0.166991	0.710446	Csa5G021870|Csa2G248740|Csa7G209030|Csa4G293310	csv:101206329|csv:101208417|csv:101222467|csv:101218612|	101206329|101208417|101222467|101218612|	http://www.genome.jp/kegg-bin/show_pathway?csv00300/csv:101222467%09red/csv:101218612%09red/csv:101208417%09red/csv:101206329%09red
Cyanoamino acid metabolism	KEGG PATHWAY	csv00460	16	80	0.168166	0.710446	Csa5G612840|Csa3G812230|Csa4G377740|Csa4G001720|Csa2G145880|Csa2G057070|Csa3G812220|Csa2G055040|Csa1G168360|Csa1G611290|Csa1G612880|Csa1G025780|Csa3G842070|Csa3G402970|Csa1G611270|Csa6G366400	csv:101209588|csv:101232517|csv:101215287|csv:101226132|csv:101215910|csv:101218493|csv:101225858|csv:101212821|csv:101209360|csv:101214518|csv:101229333|csv:101204835|csv:101223112|csv:101217315|csv:101208027|csv:101202924|	101209588|101232517|101215287|101226132|101215910|101218493|101225858|101212821|101209360|101214518|101229333|101204835|101223112|101217315|101208027|101202924|	http://www.genome.jp/kegg-bin/show_pathway?csv00460/csv:101217315%09red/csv:101232517%09red/csv:101223112%09red/csv:101226132%09red/csv:101204835%09red/csv:101215287%09red/csv:101202924%09red/csv:101212821%09red/csv:101209360%09red/csv:101225858%09red/csv:101218493%09red/csv:101209588%09red/csv:101208027%09red/csv:101229333%09red/csv:101214518%09red/csv:101215910%09red
Carbon fixation in photosynthetic organisms	KEGG PATHWAY	csv00710	19	99	0.17985	0.710446	Csa3G150740|Csa5G622460|Csa3G638540|Csa7G239010|Csa6G136020|Csa5G198220|Csa5G577360|Csa5G571460|Csa4G664300|Csa6G497060|Csa7G048110|Csa2G011530|Csa3G252490|Csa1G050250|Csa3G126240|Csa6G042490|Csa1G096620|Csa6G073990|Csa1G574870	csv:101214608|csv:101211170|csv:101220055|csv:101229073|csv:101226860|csv:101209723|csv:101216256|csv:101212988|csv:101205112|csv:101225691|csv:101208202|csv:101221375|csv:101202856|csv:101226669|csv:101229212|csv:101205576|csv:101217299|csv:101229465|csv:101219936|	101214608|101211170|101220055|101229073|101226860|101209723|101216256|101212988|101205112|101225691|101208202|101221375|101202856|101226669|101229212|101205576|101217299|101229465|101219936|	http://www.genome.jp/kegg-bin/show_pathway?csv00710/csv:101226669%09red/csv:101214608%09red/csv:101211170%09red/csv:101216256%09red/csv:101205112%09red/csv:101229465%09red/csv:101225691%09red/csv:101220055%09red/csv:101208202%09red/csv:101202856%09red/csv:101212988%09red/csv:101219936%09red/csv:101229212%09red/csv:101209723%09red/csv:101229073%09red/csv:101205576%09red/csv:101217299%09red/csv:101…
Sulfur metabolism	KEGG PATHWAY	csv00920	10	47	0.192547	0.710446	Csa1G072460|Csa3G769110|Csa6G513670|Csa1G574800|Csa1G062380|Csa3G872050|Csa3G851880|Csa3G851890|Csa5G589260|Csa6G509570	csv:101230340|csv:101213467|csv:101220567|csv:101219222|csv:101211864|csv:101217416|csv:101215869|csv:101230107|csv:101230960|csv:101231382|	101230340|101213467|101220567|101219222|101211864|101217416|101215869|101230107|101230960|101231382|	http://www.genome.jp/kegg-bin/show_pathway?csv00920/csv:101230340%09red/csv:101230960%09red/csv:101213467%09red/csv:101231382%09red/csv:101230107%09red/csv:101215869%09red/csv:101211864%09red/csv:101217416%09red/csv:101220567%09red/csv:101219222%09red
Biosynthesis of amino acids	KEGG PATHWAY	csv01230	53	313	0.197938	0.710446	Csa3G133100|Csa7G064020|Csa3G891650|Csa6G496970|Csa3G603580|Csa6G487590|Csa6G495740|Csa5G160240|Csa1G050250|Csa4G629470|Csa3G904100|Csa1G537580|Csa1G046170|Csa4G377740|Csa6G136020|Csa4G293310|Csa5G571460|Csa7G209030|Csa6G507310|Csa1G001520|Csa2G369040|Csa7G212660|Csa3G126240|Csa3G734910|Csa4G000560|Csa3G842030|Csa2G248740|Csa3G651740|Csa3G363180|Csa5G021870|Csa4G354630|Csa4G006270|Csa2G000280|Csa…	csv:101217323|csv:101221603|csv:101205167|csv:101217437|csv:101213224|csv:101229034|csv:101223180|csv:101215470|csv:101226669|csv:101231189|csv:101223065|csv:101209591|csv:101204330|csv:101215287|csv:101226860|csv:101218612|csv:101212988|csv:101222467|csv:101217715|csv:101213339|csv:101228752|csv:101205184|csv:101229212|csv:101222699|csv:101220786|csv:101224620|csv:101208417|csv:101219910|csv:101…	101217323|101221603|101205167|101217437|101213224|101229034|101223180|101215470|101226669|101231189|101223065|101209591|101204330|101215287|101226860|101218612|101212988|101222467|101217715|101213339|101228752|101205184|101229212|101222699|101220786|101224620|101208417|101219910|101224798|101206329|101203976|101229174|101226430|101205909|101221375|101210170|101205520|101213336|101217299|101226596…	http://www.genome.jp/kegg-bin/show_pathway?csv01230/csv:101217715%09red/csv:101223065%09red/csv:101213339%09red/csv:101231189%09red/csv:101205167%09red/csv:101222467%09red/csv:101215287%09red/csv:101229034%09red/csv:101212988%09red/csv:101225152%09red/csv:101205753%09red/csv:101224798%09red/csv:101217437%09red/csv:101229073%09red/csv:101226860%09red/csv:101226596%09red/csv:101209591%09red/csv:101…
Starch and sucrose metabolism	KEGG PATHWAY	csv00500	47	275	0.198129	0.710446	Csa3G812230|Csa4G001720|Csa4G002510|Csa1G612880|Csa1G597780|Csa4G119780|Csa2G296010|Csa3G033800|Csa1G597800|Csa2G167190|Csa6G366400|Csa5G612840|Csa3G516510|Csa5G568310|Csa3G842070|Csa1G611290|Csa1G025780|Csa7G058620|Csa1G574970|Csa3G126220|Csa4G646140|Csa2G146400|Csa5G568300|Csa2G037230|Csa5G172290|Csa6G177440|Csa3G812220|Csa4G001950|Csa6G500540|Csa3G133950|Csa5G149880|Csa1G611270|Csa1G005560|Csa…	csv:101232517|csv:101226132|csv:101213153|csv:101229333|csv:101214012|csv:101228322|csv:101208819|csv:101220548|csv:101213767|csv:101216744|csv:101202924|csv:101209588|csv:101206803|csv:101218883|csv:101223112|csv:101214518|csv:101204835|csv:101216143|csv:101227105|csv:101215329|csv:101215520|csv:101216154|csv:101219120|csv:101214888|csv:101212568|csv:101217748|csv:101225858|csv:101203847|csv:101…	101232517|101226132|101213153|101229333|101214012|101228322|101208819|101220548|101213767|101216744|101202924|101209588|101206803|101218883|101223112|101214518|101204835|101216143|101227105|101215329|101215520|101216154|101219120|101214888|101212568|101217748|101225858|101203847|101229370|101221739|101226999|101208027|101209676|101216247|101209204|101213082|101213300|101208090|101225863|101205557…	http://www.genome.jp/kegg-bin/show_pathway?csv00500/csv:101214888%09red/csv:101212172%09red/csv:101232517%09red/csv:101226132%09red/csv:101206803%09red/csv:101204835%09red/csv:101215520%09red/csv:101205557%09red/csv:101216744%09red/csv:101219120%09red/csv:101209588%09red/csv:101208819%09red/csv:101209676%09red/csv:101206719%09red/csv:101213767%09red/csv:101228322%09red/csv:101214012%09red/csv:101…
Arginine and proline metabolism	KEGG PATHWAY	csv00330	21	113	0.198352	0.710446	Csa1G005520|Csa5G643300|Csa2G382520|Csa4G291370|Csa3G891650|Csa4G025140|Csa4G354630|Csa1G014490|Csa5G590070|Csa4G361890|Csa1G005600|Csa4G361880|Csa6G495740|Csa1G005540|Csa3G859690|Csa3G604620|Csa4G062920|Csa3G734910|Csa1G096620|Csa6G495730|Csa2G379190	csv:101209430|csv:101219166|csv:101225152|csv:101205263|csv:101205167|csv:101227388|csv:101203976|csv:101210752|csv:101209590|csv:101224400|csv:101210170|csv:101224178|csv:101223180|csv:101210007|csv:101222023|csv:101212743|csv:101213852|csv:101222699|csv:101217299|csv:101226596|csv:101203871|	101209430|101219166|101225152|101205263|101205167|101227388|101203976|101210752|101209590|101224400|101210170|101224178|101223180|101210007|101222023|101212743|101213852|101222699|101217299|101226596|101203871|	http://www.genome.jp/kegg-bin/show_pathway?csv00330/csv:101213852%09red/csv:101226596%09red/csv:101219166%09red/csv:101217299%09red/csv:101203976%09red/csv:101203871%09red/csv:101224400%09red/csv:101209590%09red/csv:101212743%09red/csv:101225152%09red/csv:101210170%09red/csv:101223180%09red/csv:101210007%09red/csv:101227388%09red/csv:101205263%09red/csv:101222023%09red/csv:101222699%09red/csv:101…
Tryptophan metabolism	KEGG PATHWAY	csv00380	8	36	0.199233	0.710446	Csa1G005520|Csa4G361890|Csa4G291370|Csa4G361880|Csa5G512860|Novel00044|Csa4G658590|Csa2G375750	csv:101209430|csv:101224400|csv:101205263|csv:101224178|csv:101208883|csv:101224415|csv:101202931|csv:101226342|	101209430|101224400|101205263|101224178|101208883|101224415|101202931|101226342|	http://www.genome.jp/kegg-bin/show_pathway?csv00380/csv:101226342%09red/csv:101205263%09red/csv:101224415%09red/csv:101202931%09red/csv:101208883%09red/csv:101224400%09red/csv:101224178%09red/csv:101209430%09red
Plant-pathogen interaction	KEGG PATHWAY	csv04626	32	181	0.199629	0.710446	Csa7G073720|Csa1G569450|Csa3G319280|Csa3G845500|Csa1G025020|Csa5G638350|Csa3G607120|Csa5G628650|Csa3G183950|Csa4G279790|Csa6G513780|Csa3G588520|Csa3G874390|Csa3G077600|Csa7G432280|Csa1G003540|Csa7G060160|Csa4G011740|Novel00616|Csa4G050200|Csa3G167380|Csa1G614120|Csa2G368880|Csa2G215510|Csa3G607130|Csa7G026240|Csa7G274170|Csa5G152170|Csa6G522700|Csa3G130890|Csa6G445180|Novel00628	csv:101219869|csv:101206498|csv:101218237|csv:101209614|csv:101220025|csv:101203560|csv:101225466|csv:101231341|csv:101223769|csv:101227241|csv:101218270|csv:101207843|csv:101211964|csv:101215161|csv:101210335|csv:101202988|csv:101216386|csv:101220633|csv:101216386|csv:101213932|csv:101231277|csv:101213819|csv:101231900|csv:101219440|csv:101212985|csv:101221662|csv:101218013|csv:101212879|csv:101…	101219869|101206498|101218237|101209614|101220025|101203560|101225466|101231341|101223769|101227241|101218270|101207843|101211964|101215161|101210335|101202988|101216386|101220633|101216386|101213932|101231277|101213819|101231900|101219440|101212985|101221662|101218013|101212879|101215973|101224082|101229428|101216386|	http://www.genome.jp/kegg-bin/show_pathway?csv04626/csv:101212985%09red/csv:101224082%09red/csv:101231341%09red/csv:101218013%09red/csv:101209614%09red/csv:101216386%09red/csv:101213819%09red/csv:101215161%09red/csv:101221662%09red/csv:101220633%09red/csv:101220025%09red/csv:101213932%09red/csv:101219869%09red/csv:101202988%09red/csv:101231900%09red/csv:101207843%09red/csv:101225466%09red/csv:101…
Fatty acid biosynthesis	KEGG PATHWAY	csv00061	10	49	0.223268	0.742086	Csa4G286380|Csa4G092990|Csa5G396020|Csa4G051550|Csa1G051630|Csa7G031600|Csa4G438530|Csa2G005370|Csa2G350440|Csa1G397120	csv:101210519|csv:101222930|csv:101212380|csv:101225233|csv:101218502|csv:101212158|csv:101226954|csv:101206509|csv:101224010|csv:101210955|	101210519|101222930|101212380|101225233|101218502|101212158|101226954|101206509|101224010|101210955|	http://www.genome.jp/kegg-bin/show_pathway?csv00061/csv:101225233%09red/csv:101210519%09red/csv:101218502%09red/csv:101224010%09red/csv:101210955%09red/csv:101222930%09red/csv:101206509%09red/csv:101212158%09red/csv:101226954%09red/csv:101212380%09red
Phosphatidylinositol signaling system	KEGG PATHWAY	csv04070	13	67	0.225814	0.742086	Csa7G258840|Csa2G245420|Csa2G361850|Csa3G167380|Csa6G123470|Csa6G511760|Csa6G011650|Csa3G099600|Csa7G206930|Csa1G662800|Csa3G824810|Csa1G039060|Csa4G279790	csv:101215702|csv:101224126|csv:101214357|csv:101231277|csv:101210099|csv:101230069|csv:101203631|csv:101208743|csv:101202759|csv:101211666|csv:101222304|csv:101230116|csv:101227241|	101215702|101224126|101214357|101231277|101210099|101230069|101203631|101208743|101202759|101211666|101222304|101230116|101227241|	http://www.genome.jp/kegg-bin/show_pathway?csv04070/csv:101222304%09red/csv:101224126%09red/csv:101227241%09red/csv:101231277%09red/csv:101230069%09red/csv:101210099%09red/csv:101208743%09red/csv:101211666%09red/csv:101202759%09red/csv:101214357%09red/csv:101230116%09red/csv:101215702%09red/csv:101203631%09red
Base excision repair	KEGG PATHWAY	csv03410	9	44	0.237828	0.742086	Csa1G434690|Csa6G188070|Csa6G151760|Csa4G626090|Csa4G006390|Csa1G435200|Csa6G476130|Csa1G561390|Csa3G398930	csv:101207444|csv:101208473|csv:101208568|csv:101228942|csv:101209571|csv:101229011|csv:101219332|csv:101204273|csv:101219129|	101207444|101208473|101208568|101228942|101209571|101229011|101219332|101204273|101219129|	http://www.genome.jp/kegg-bin/show_pathway?csv03410/csv:101228942%09red/csv:101204273%09red/csv:101209571%09red/csv:101207444%09red/csv:101229011%09red/csv:101208568%09red/csv:101219129%09red/csv:101219332%09red/csv:101208473%09red
Mismatch repair	KEGG PATHWAY	csv03430	10	50	0.239305	0.742086	Csa1G464550|Csa5G614640|Csa6G426950|Csa6G476130|Csa6G188070|Csa4G626090|Csa6G502800|Csa4G361280|Csa3G182010|Csa1G013800	csv:101214177|csv:101229844|csv:101204361|csv:101219332|csv:101208473|csv:101228942|csv:101218071|csv:101221224|csv:101214720|csv:101208545|	101214177|101229844|101204361|101219332|101208473|101228942|101218071|101221224|101214720|101208545|	http://www.genome.jp/kegg-bin/show_pathway?csv03430/csv:101228942%09red/csv:101229844%09red/csv:101204361%09red/csv:101218071%09red/csv:101214720%09red/csv:101214177%09red/csv:101221224%09red/csv:101208545%09red/csv:101219332%09red/csv:101208473%09red
Butanoate metabolism	KEGG PATHWAY	csv00650	6	27	0.246154	0.742086	Csa4G056840|Csa3G848210|Csa1G001520|Csa5G348050|Csa6G429100|Csa1G031730	csv:101220932|csv:101225592|csv:101213339|csv:101231718|csv:101203798|csv:101210903|	101220932|101225592|101213339|101231718|101203798|101210903|	http://www.genome.jp/kegg-bin/show_pathway?csv00650/csv:101220932%09red/csv:101213339%09red/csv:101203798%09red/csv:101225592%09red/csv:101210903%09red/csv:101231718%09red
Plant hormone signal transduction	KEGG PATHWAY	csv04075	60	366	0.24654	0.742086	Csa3G866530|Csa4G515040|Csa5G603910|Csa2G286490|Csa4G036580|Csa4G556180|Csa2G359970|Csa3G822100|Csa1G231530|Csa3G610800|Csa7G073570|Csa5G628650|Csa1G690240|Csa2G373410|Csa2G225320|Csa1G572420|Csa2G257100|Csa3G127150|Csa2G381760|Csa6G497220|Csa7G060160|Csa7G009140|Csa4G312880|Csa2G035330|Csa6G051520|Csa6G363590|Csa3G902310|Csa5G434550|Novel00616|Csa3G819960|Csa2G403160|Csa5G139100|Csa2G236620|Csa1…	csv:101230000|csv:101214088|csv:101209506|csv:101224862|csv:101208419|csv:101204264|csv:101226656|csv:101220810|csv:101203761|csv:101204327|csv:101230126|csv:101231341|csv:101225571|csv:101219195|csv:101223351|csv:101213011|csv:101222974|csv:101228381|csv:101225385|csv:101224550|csv:101216386|csv:101227446|csv:101216106|csv:101216738|csv:101214396|csv:101207918|csv:101230090|csv:101231852|csv:101…	101230000|101214088|101209506|101224862|101208419|101204264|101226656|101220810|101203761|101204327|101230126|101231341|101225571|101219195|101223351|101213011|101222974|101228381|101225385|101224550|101216386|101227446|101216106|101216738|101214396|101207918|101230090|101231852|101216386|101219149|101217648|101232246|101207512|101225389|101221088|101223043|101211093|101228798|101227161|101205805…	http://www.genome.jp/kegg-bin/show_pathway?csv04075/csv:101203761%09red/csv:101227161%09red/csv:101226308%09red/csv:101211093%09red/csv:101216767%09red/csv:101220173%09red/csv:101231341%09red/csv:101223043%09red/csv:101230090%09red/csv:101221088%09red/csv:101203330%09red/csv:101216386%09red/csv:101214314%09red/csv:101205805%09red/csv:101214188%09red/csv:101226656%09red/csv:101219149%09red/csv:101…
Carbon metabolism	KEGG PATHWAY	csv01200	50	304	0.262584	0.742086	Csa6G497060|Csa4G000560|Csa4G664300|Csa6G308420|Csa3G150740|Csa1G617370|Csa1G050250|Csa1G030620|Csa5G160240|Csa6G042490|Csa5G346550|Csa3G904100|Csa4G377740|Csa6G136020|Csa5G198220|Csa2G009470|Csa5G577360|Csa5G571460|Csa6G507310|Csa6G073990|Csa5G622460|Csa4G050830|Csa5G512860|Csa3G126240|Csa4G438530|Csa1G574970|Csa3G651740|Csa4G092990|Csa3G848210|Csa1G574870|Csa7G048110|Csa4G443140|Csa6G449240|Csa…	csv:101225691|csv:101220786|csv:101205112|csv:101209306|csv:101214608|csv:101217893|csv:101226669|csv:101209672|csv:101215470|csv:101205576|csv:101211294|csv:101223065|csv:101215287|csv:101226860|csv:101209723|csv:101208699|csv:101216256|csv:101212988|csv:101217715|csv:101229465|csv:101211170|csv:101206171|csv:101208883|csv:101229212|csv:101226954|csv:101227105|csv:101219910|csv:101222930|csv:101…	101225691|101220786|101205112|101209306|101214608|101217893|101226669|101209672|101215470|101205576|101211294|101223065|101215287|101226860|101209723|101208699|101216256|101212988|101217715|101229465|101211170|101206171|101208883|101229212|101226954|101227105|101219910|101222930|101225592|101219936|101208202|101203574|101205909|101221375|101202856|101215910|101215151|101203579|101217299|101219222…	http://www.genome.jp/kegg-bin/show_pathway?csv01200/csv:101217715%09red/csv:101223065%09red/csv:101208699%09red/csv:101206809%09red/csv:101215287%09red/csv:101202856%09red/csv:101212988%09red/csv:101225592%09red/csv:101227814%09red/csv:101211294%09red/csv:101229073%09red/csv:101205576%09red/csv:101226860%09red/csv:101217299%09red/csv:101209672%09red/csv:101208773%09red/csv:101205909%09red/csv:101…
Glycosphingolipid biosynthesis - globo series	KEGG PATHWAY	csv00603	3	11	0.266162	0.742086	Csa5G580630|Csa5G180280|Csa1G073660	csv:101211924|csv:101202942|csv:101220697|	101211924|101202942|101220697|	http://www.genome.jp/kegg-bin/show_pathway?csv00603/csv:101202942%09red/csv:101211924%09red/csv:101220697%09red
Amino sugar and nucleotide sugar metabolism	KEGG PATHWAY	csv00520	27	158	0.272528	0.742086	Csa2G006110|Csa4G002510|Csa4G119780|Csa6G008750|Csa2G036660|Csa2G011460|Csa1G434140|Csa6G509030|Csa3G516510|Csa3G120500|Csa5G568310|Csa1G574970|Csa6G376260|Csa2G146400|Csa5G155470|Csa5G156140|Csa2G037230|Csa5G172290|Csa6G177440|Csa7G058620|Csa5G148720|Csa4G052620|Csa3G168910|Csa5G167200|Csa5G180280|Csa3G126220|Csa4G646090	csv:101223173|csv:101213153|csv:101228322|csv:101229347|csv:101216327|csv:101222554|csv:101227672|csv:101215088|csv:101206803|csv:101216129|csv:101218883|csv:101227105|csv:101202798|csv:101216154|csv:101227659|csv:101228560|csv:101214888|csv:101212568|csv:101217748|csv:101216143|csv:101205820|csv:101209558|csv:101231272|csv:101220595|csv:101202942|csv:101215329|csv:101208634|	101223173|101213153|101228322|101229347|101216327|101222554|101227672|101215088|101206803|101216129|101218883|101227105|101202798|101216154|101227659|101228560|101214888|101212568|101217748|101216143|101205820|101209558|101231272|101220595|101202942|101215329|101208634|	http://www.genome.jp/kegg-bin/show_pathway?csv00520/csv:101214888%09red/csv:101227659%09red/csv:101229347%09red/csv:101206803%09red/csv:101227672%09red/csv:101205820%09red/csv:101202798%09red/csv:101218883%09red/csv:101208634%09red/csv:101228322%09red/csv:101217748%09red/csv:101213153%09red/csv:101220595%09red/csv:101216143%09red/csv:101223173%09red/csv:101216129%09red/csv:101222554%09red/csv:101…
Regulation of autophagy	KEGG PATHWAY	csv04140	9	46	0.273223	0.742086	Csa6G493830|Csa3G713870|Csa4G269780|Csa6G513730|Csa6G001220|Csa5G034000|Csa2G418350|Csa4G331090|CsaUNG031630	csv:101210843|csv:101218600|csv:101221173|csv:101223536|csv:101228104|csv:101217510|csv:101217161|csv:101209068|csv:101218600|	101210843|101218600|101221173|101223536|101228104|101217510|101217161|101209068|101218600|	http://www.genome.jp/kegg-bin/show_pathway?csv04140/csv:101210843%09red/csv:101217161%09red/csv:101228104%09red/csv:101223536%09red/csv:101221173%09red/csv:101209068%09red/csv:101218600%09red/csv:101217510%09red
Stilbenoid, diarylheptanoid and gingerol biosynthesis	KEGG PATHWAY	csv00945	4	17	0.282115	0.742086	Csa6G133710|Csa3G819790|Csa7G431440|Csa2G070210	csv:101221846|csv:101217257|csv:101214857|csv:101204747|	101221846|101217257|101214857|101204747|	http://www.genome.jp/kegg-bin/show_pathway?csv00945/csv:101221846%09red/csv:101214857%09red/csv:101204747%09red/csv:101217257%09red
Thiamine metabolism	KEGG PATHWAY	csv00730	4	17	0.282115	0.742086	Csa3G078800|Csa1G528590|Csa2G379940|Csa6G497010	csv:101211553|csv:101213311|csv:101227432|csv:101218146|	101211553|101213311|101227432|101218146|	http://www.genome.jp/kegg-bin/show_pathway?csv00730/csv:101211553%09red/csv:101213311%09red/csv:101227432%09red/csv:101218146%09red
Nucleotide excision repair	KEGG PATHWAY	csv03420	13	72	0.297408	0.758036	Csa7G390020|Csa1G434690|Csa5G614640|Csa6G426950|Csa1G013800|Csa6G188070|Csa6G151760|Csa4G626090|Csa6G502800|Csa4G361280|Csa1G435200|Csa6G185330|Csa6G476130	csv:101205132|csv:101207444|csv:101229844|csv:101204361|csv:101208545|csv:101208473|csv:101208568|csv:101228942|csv:101218071|csv:101221224|csv:101229011|csv:101212319|csv:101219332|	101205132|101207444|101229844|101204361|101208545|101208473|101208568|101228942|101218071|101221224|101229011|101212319|101219332|	http://www.genome.jp/kegg-bin/show_pathway?csv03420/csv:101228942%09red/csv:101229844%09red/csv:101207444%09red/csv:101204361%09red/csv:101229011%09red/csv:101218071%09red/csv:101205132%09red/csv:101208568%09red/csv:101212319%09red/csv:101221224%09red/csv:101208545%09red/csv:101219332%09red/csv:101208473%09red
Pentose phosphate pathway	KEGG PATHWAY	csv00030	12	66	0.300709	0.758036	Csa5G568310|Csa2G009470|Csa5G571460|Csa4G443140|Csa2G011530|Csa3G126240|Csa4G050830|Novel00625|Csa5G606770|Csa5G160240|Csa6G042490|Csa3G904100	csv:101218883|csv:101208699|csv:101212988|csv:101203574|csv:101221375|csv:101229212|csv:101206171|csv:101206809|csv:101224980|csv:101215470|csv:101205576|csv:101223065|	101218883|101208699|101212988|101203574|101221375|101229212|101206171|101206809|101224980|101215470|101205576|101223065|	http://www.genome.jp/kegg-bin/show_pathway?csv00030/csv:101223065%09red/csv:101208699%09red/csv:101206809%09red/csv:101206171%09red/csv:101212988%09red/csv:101203574%09red/csv:101229212%09red/csv:101205576%09red/csv:101215470%09red/csv:101218883%09red/csv:101224980%09red/csv:101221375%09red
Tropane, piperidine and pyridine alkaloid biosynthesis	KEGG PATHWAY	csv00960	6	30	0.316055	0.780462	Csa6G423980|Csa2G382520|Csa5G184270|Csa5G158570|Csa4G629470|Csa1G096620	csv:101229213|csv:101225152|csv:101226260|csv:101213059|csv:101231189|csv:101217299|	101229213|101225152|101226260|101213059|101231189|101217299|	http://www.genome.jp/kegg-bin/show_pathway?csv00960/csv:101217299%09red/csv:101226260%09red/csv:101225152%09red/csv:101229213%09red/csv:101213059%09red/csv:101231189%09red
beta-Alanine metabolism	KEGG PATHWAY	csv00410	11	62	0.337477	0.781347	Csa1G005520|Csa6G423980|Csa5G158570|Csa5G348050|Csa4G361890|Csa4G291370|Csa4G361880|Csa4G062920|Csa1G005540|Csa3G604620|Csa1G031730	csv:101209430|csv:101229213|csv:101213059|csv:101231718|csv:101224400|csv:101205263|csv:101224178|csv:101213852|csv:101210007|csv:101212743|csv:101210903|	101209430|101229213|101213059|101231718|101224400|101205263|101224178|101213852|101210007|101212743|101210903|	http://www.genome.jp/kegg-bin/show_pathway?csv00410/csv:101213852%09red/csv:101205263%09red/csv:101212743%09red/csv:101229213%09red/csv:101210007%09red/csv:101213059%09red/csv:101210903%09red/csv:101224400%09red/csv:101231718%09red/csv:101224178%09red/csv:101209430%09red
Isoquinoline alkaloid biosynthesis	KEGG PATHWAY	csv00950	5	25	0.342673	0.781347	Csa4G629470|Csa5G158570|Csa6G423980|Csa2G382520|Csa1G096620	csv:101231189|csv:101213059|csv:101229213|csv:101225152|csv:101217299|	101231189|101213059|101229213|101225152|101217299|	http://www.genome.jp/kegg-bin/show_pathway?csv00950/csv:101225152%09red/csv:101229213%09red/csv:101213059%09red/csv:101231189%09red/csv:101217299%09red
Sesquiterpenoid and triterpenoid biosynthesis	KEGG PATHWAY	csv00909	5	25	0.342673	0.781347	Csa2G251460|Csa7G069710|Novel00557|Csa5G478610|Csa5G478620	csv:101227146|csv:101210582|csv:101216883|csv:101231068|csv:101231068|	101227146|101210582|101216883|101231068|101231068|	http://www.genome.jp/kegg-bin/show_pathway?csv00909/csv:101216883%09red/csv:101210582%09red/csv:101227146%09red/csv:101231068%09red
Valine, leucine and isoleucine degradation	KEGG PATHWAY	csv00280	9	50	0.347817	0.781347	Csa1G005520|Csa6G496970|Csa7G073600|Csa4G291370|Csa6G308420|Csa4G361890|Csa6G429100|Csa4G361880|Csa3G017300	csv:101209430|csv:101217437|csv:101204438|csv:101205263|csv:101209306|csv:101224400|csv:101203798|csv:101224178|csv:101227747|	101209430|101217437|101204438|101205263|101209306|101224400|101203798|101224178|101227747|	http://www.genome.jp/kegg-bin/show_pathway?csv00280/csv:101209306%09red/csv:101203798%09red/csv:101205263%09red/csv:101227747%09red/csv:101217437%09red/csv:101224400%09red/csv:101224178%09red/csv:101204438%09red/csv:101209430%09red
Alanine, aspartate and glutamate metabolism	KEGG PATHWAY	csv00250	12	69	0.3487	0.781347	Csa4G056840|Csa2G252070|Csa4G036590|Csa2G382520|Csa3G891650|Csa4G025140|Csa5G348050|Csa1G617370|Csa5G524850|Csa3G603580|Csa1G096620|Csa1G031730	csv:101220932|csv:101203840|csv:101208662|csv:101225152|csv:101205167|csv:101227388|csv:101231718|csv:101217893|csv:101205815|csv:101213224|csv:101217299|csv:101210903|	101220932|101203840|101208662|101225152|101205167|101227388|101231718|101217893|101205815|101213224|101217299|101210903|	http://www.genome.jp/kegg-bin/show_pathway?csv00250/csv:101203840%09red/csv:101220932%09red/csv:101208662%09red/csv:101217299%09red/csv:101205167%09red/csv:101225152%09red/csv:101227388%09red/csv:101210903%09red/csv:101217893%09red/csv:101231718%09red/csv:101205815%09red/csv:101213224%09red
Diterpenoid biosynthesis	KEGG PATHWAY	csv00904	8	45	0.37371	0.822161	Csa5G172270|Csa3G903550|Csa3G903530|Csa3G903540|Csa7G434970|Csa4G075200|Csa7G239640|Csa3G903510	csv:101212803|csv:101207275|csv:101228426|csv:101228426|csv:101223012|csv:101231505|csv:101228412|csv:101229313|	101212803|101207275|101228426|101228426|101223012|101231505|101228412|101229313|	http://www.genome.jp/kegg-bin/show_pathway?csv00904/csv:101223012%09red/csv:101231505%09red/csv:101207275%09red/csv:101212803%09red/csv:101228412%09red/csv:101229313%09red/csv:101228426%09red
Terpenoid backbone biosynthesis	KEGG PATHWAY	csv00900	12	72	0.397881	0.840993	Csa2G296070|Csa4G082310|Csa3G895920|Csa6G185830|Csa1G084300|Csa3G270270|Csa7G211090|Csa2G074290|Csa3G113320|Csa7G029390|Csa2G379940|Csa3G121680	csv:101231482|csv:101227873|csv:101214936|csv:101225762|csv:101214344|csv:101206540|csv:101204450|csv:101208431|csv:101212112|csv:101219178|csv:101227432|csv:101219049|	101231482|101227873|101214936|101225762|101214344|101206540|101204450|101208431|101212112|101219178|101227432|101219049|	http://www.genome.jp/kegg-bin/show_pathway?csv00900/csv:101219178%09red/csv:101227873%09red/csv:101227432%09red/csv:101206540%09red/csv:101214936%09red/csv:101231482%09red/csv:101212112%09red/csv:101208431%09red/csv:101204450%09red/csv:101225762%09red/csv:101219049%09red/csv:101214344%09red
Fructose and mannose metabolism	KEGG PATHWAY	csv00051	11	66	0.406184	0.840993	Csa6G512900|Csa4G664520|Csa5G167200|Csa5G157250|Csa5G172290|Csa6G008750|Csa2G036660|Csa7G007830|Csa6G042490|Csa2G049960|Csa1G574970	csv:101203616|csv:101231005|csv:101220595|csv:101208090|csv:101212568|csv:101229347|csv:101216327|csv:101214993|csv:101205576|csv:101209640|csv:101227105|	101203616|101231005|101220595|101208090|101212568|101229347|101216327|101214993|101205576|101209640|101227105|	http://www.genome.jp/kegg-bin/show_pathway?csv00051/csv:101212568%09red/csv:101208090%09red/csv:101203616%09red/csv:101229347%09red/csv:101216327%09red/csv:101214993%09red/csv:101227105%09red/csv:101220595%09red/csv:101205576%09red/csv:101231005%09red/csv:101209640%09red
Metabolic pathways	KEGG PATHWAY	csv01100	374	2496	0.407787	0.840993	Csa6G385090|Csa6G361340|Csa3G859690|Csa3G904100|Csa4G286380|Csa6G445240|Csa2G055040|Csa6G007980|Csa4G310720|Csa6G490230|Csa6G423980|Csa5G184270|Csa3G252490|Csa3G006640|Csa7G219200|Csa1G005540|Csa7G033300|Csa7G212660|Csa4G000560|Csa4G293310|Csa4G218350|Csa7G291720|Csa2G277050|Csa5G589260|Csa3G036480|Csa3G017300|Csa4G050830|Csa5G512860|Csa5G649350|Csa3G734910|Csa2G146400|Csa6G486750|Csa7G024000|Csa…	csv:101230065|csv:101227073|csv:101222023|csv:101223065|csv:101210519|csv:101217907|csv:101212821|csv:101213181|csv:101230385|csv:101228067|csv:101229213|csv:101226260|csv:101202856|csv:101207925|csv:101205337|csv:101210007|csv:101228424|csv:101205184|csv:101220786|csv:101218612|csv:101207778|csv:101228565|csv:101212903|csv:101230960|csv:101231811|csv:101227747|csv:101206171|csv:101208883|csv:101…	101230065|101227073|101222023|101223065|101210519|101217907|101212821|101213181|101230385|101228067|101229213|101226260|101202856|101207925|101205337|101210007|101228424|101205184|101220786|101218612|101207778|101228565|101212903|101230960|101231811|101227747|101206171|101208883|101204709|101222699|101216154|101210105|101229151|101225233|101209591|101204961|101213412|101213300|101228154|101207725…	http://www.genome.jp/kegg-bin/show_pathway?csv01100/csv:101231189%09red/csv:101202798%09red/csv:101209676%09red/csv:101203798%09red/csv:101209672%09red/csv:101205909%09red/csv:101230214%09red/csv:101210519%09red/csv:101211752%09red/csv:101222699%09red/csv:101221846%09red/csv:101224178%09red/csv:101217257%09red/csv:101230976%09red/csv:101203840%09red/csv:101216256%09red/csv:101210335%09red/csv:101…
Peroxisome	KEGG PATHWAY	csv04146	16	99	0.41165	0.840993	Csa7G031600|Csa4G658590|Csa6G429100|Csa1G004940|Csa6G513580|Csa7G047330|Csa7G238970|Csa1G617370|Csa6G421720|Csa4G000970|Csa3G100790|Csa6G151810|Csa5G346550|Csa1G024840|Csa1G613540|Csa4G051550	csv:101212158|csv:101202931|csv:101203798|csv:101207964|csv:101221512|csv:101214701|csv:101215029|csv:101217893|csv:101211500|csv:101210878|csv:101228605|csv:101209050|csv:101211294|csv:101216945|csv:101211977|csv:101225233|	101212158|101202931|101203798|101207964|101221512|101214701|101215029|101217893|101211500|101210878|101228605|101209050|101211294|101216945|101211977|101225233|	http://www.genome.jp/kegg-bin/show_pathway?csv04146/csv:101215029%09red/csv:101225233%09red/csv:101203798%09red/csv:101214701%09red/csv:101207964%09red/csv:101228605%09red/csv:101211294%09red/csv:101211500%09red/csv:101216945%09red/csv:101221512%09red/csv:101202931%09red/csv:101217893%09red/csv:101209050%09red/csv:101211977%09red/csv:101212158%09red/csv:101210878%09red
Lysine degradation	KEGG PATHWAY	csv00310	5	28	0.42352	0.840993	Csa1G005520|Csa4G291370|Csa4G361880|Csa4G361890|Csa5G512860	csv:101209430|csv:101205263|csv:101224178|csv:101224400|csv:101208883|	101209430|101205263|101224178|101224400|101208883|	http://www.genome.jp/kegg-bin/show_pathway?csv00310/csv:101224400%09red/csv:101224178%09red/csv:101205263%09red/csv:101208883%09red/csv:101209430%09red
C5-Branched dibasic acid metabolism	KEGG PATHWAY	csv00660	2	9	0.423972	0.840993	Csa4G006270|Csa1G001520	csv:101229174|csv:101213339|	101229174|101213339|	http://www.genome.jp/kegg-bin/show_pathway?csv00660/csv:101229174%09red/csv:101213339%09red
Pantothenate and CoA biosynthesis	KEGG PATHWAY	csv00770	5	29	0.450162	0.861601	Csa7G051370|Csa3G133100|Csa1G001520|Csa6G496970|Csa7G338120	csv:101213336|csv:101217323|csv:101213339|csv:101217437|csv:101207725|	101213336|101217323|101213339|101217437|101207725|	http://www.genome.jp/kegg-bin/show_pathway?csv00770/csv:101213339%09red/csv:101217323%09red/csv:101207725%09red/csv:101213336%09red/csv:101217437%09red
Riboflavin metabolism	KEGG PATHWAY	csv00740	3	16	0.450805	0.861601	Csa6G003430|Csa1G071920|Csa6G128550	csv:101202904|csv:101229446|csv:101204942|	101202904|101229446|101204942|	http://www.genome.jp/kegg-bin/show_pathway?csv00740/csv:101229446%09red/csv:101204942%09red/csv:101202904%09red
Tyrosine metabolism	KEGG PATHWAY	csv00350	8	49	0.455963	0.861601	Csa6G423980|Csa2G382520|Csa5G158570|Csa2G336130|Csa6G511740|Csa4G629470|Csa1G096620|Csa7G322060	csv:101229213|csv:101225152|csv:101213059|csv:101212817|csv:101230287|csv:101231189|csv:101217299|csv:101206036|	101229213|101225152|101213059|101212817|101230287|101231189|101217299|101206036|	http://www.genome.jp/kegg-bin/show_pathway?csv00350/csv:101231189%09red/csv:101230287%09red/csv:101206036%09red/csv:101212817%09red/csv:101225152%09red/csv:101229213%09red/csv:101213059%09red/csv:101217299%09red
Flavonoid biosynthesis	KEGG PATHWAY	csv00941	4	23	0.465985	0.861601	Csa6G133710|Csa3G819790|Csa7G431440|Csa2G070210	csv:101221846|csv:101217257|csv:101214857|csv:101204747|	101221846|101217257|101214857|101204747|	http://www.genome.jp/kegg-bin/show_pathway?csv00941/csv:101221846%09red/csv:101214857%09red/csv:101204747%09red/csv:101217257%09red
Other types of O-glycan biosynthesis	KEGG PATHWAY	csv00514	2	10	0.469964	0.861601	Csa1G665390|CsaUNG024970	csv:101217983|csv:101230373|	101217983|101230373|	http://www.genome.jp/kegg-bin/show_pathway?csv00514/csv:101217983%09red/csv:101230373%09red
Ether lipid metabolism	KEGG PATHWAY	csv00565	6	37	0.484473	0.874943	Csa5G608060|Csa2G361470|Csa4G358630|Csa3G124860|Csa4G651930|Csa4G004970	csv:101225379|csv:101218421|csv:101220288|csv:101209255|csv:101213538|csv:101215246|	101225379|101218421|101220288|101209255|101213538|101215246|	http://www.genome.jp/kegg-bin/show_pathway?csv00565/csv:101220288%09red/csv:101213538%09red/csv:101209255%09red/csv:101215246%09red/csv:101218421%09red/csv:101225379%09red
Glycosaminoglycan degradation	KEGG PATHWAY	csv00531	4	25	0.524175	0.92203	Csa7G425950|Csa2G270820|Csa5G180280|Csa3G845460	csv:101209508|csv:101220222|csv:101202942|csv:101208875|	101209508|101220222|101202942|101208875|	http://www.genome.jp/kegg-bin/show_pathway?csv00531/csv:101220222%09red/csv:101209508%09red/csv:101202942%09red/csv:101208875%09red
Ascorbate and aldarate metabolism	KEGG PATHWAY	csv00053	9	60	0.538378	0.92203	Csa1G005520|Csa5G524740|Csa4G361890|Csa4G291370|Csa4G361880|Csa7G219200|Csa2G011460|Csa6G376260|Csa1G575130	csv:101209430|csv:101203883|csv:101224400|csv:101205263|csv:101224178|csv:101205337|csv:101222554|csv:101202798|csv:101228253|	101209430|101203883|101224400|101205263|101224178|101205337|101222554|101202798|101228253|	http://www.genome.jp/kegg-bin/show_pathway?csv00053/csv:101228253%09red/csv:101205263%09red/csv:101203883%09red/csv:101222554%09red/csv:101202798%09red/csv:101224400%09red/csv:101205337%09red/csv:101224178%09red/csv:101209430%09red
Degradation of aromatic compounds	KEGG PATHWAY	csv01220	3	19	0.552556	0.92203	Csa6G133710|Csa7G322060|Csa2G070210	csv:101221846|csv:101206036|csv:101204747|	101221846|101206036|101204747|	http://www.genome.jp/kegg-bin/show_pathway?csv01220/csv:101221846%09red/csv:101206036%09red/csv:101204747%09red
Biotin metabolism	KEGG PATHWAY	csv00780	3	19	0.552556	0.92203	Csa4G286380|Csa2G350440|Csa1G421880	csv:101210519|csv:101224010|csv:101216016|	101210519|101224010|101216016|	http://www.genome.jp/kegg-bin/show_pathway?csv00780/csv:101210519%09red/csv:101224010%09red/csv:101216016%09red
Citrate cycle (TCA cycle)	KEGG PATHWAY	csv00020	9	61	0.556564	0.92203	Csa6G497060|Csa6G362950|Csa6G507310|Csa6G308420|Csa5G603950|Csa6G331010|Csa7G284430|Csa5G512860|Csa5G346550	csv:101225691|csv:101231212|csv:101217715|csv:101209306|csv:101208773|csv:101222110|csv:101215151|csv:101208883|csv:101211294|	101225691|101231212|101217715|101209306|101208773|101222110|101215151|101208883|101211294|	http://www.genome.jp/kegg-bin/show_pathway?csv00020/csv:101217715%09red/csv:101208773%09red/csv:101208883%09red/csv:101215151%09red/csv:101225691%09red/csv:101211294%09red/csv:101222110%09red/csv:101231212%09red/csv:101209306%09red
Phenylalanine metabolism	KEGG PATHWAY	csv00360	24	166	0.574767	0.92203	Csa2G048330|Csa6G495000|Csa4G629470|Csa4G285790|Csa7G430230|Csa3G740270|Csa6G504560|Csa4G026850|Csa5G158570|Csa3G710200|Csa6G490230|Csa6G423980|Csa2G070210|Csa5G608020|Csa6G405960|Csa3G736970|Csa1G096620|Csa2G382520|Csa7G430240|Csa6G445240|Csa4G285770|Csa6G147460|Csa2G421020|Csa6G133710	csv:101210868|csv:101206860|csv:101231189|csv:101211752|csv:101218595|csv:101229976|csv:101204648|csv:101211442|csv:101213059|csv:101215427|csv:101228067|csv:101229213|csv:101204747|csv:101224303|csv:101206890|csv:101215428|csv:101217299|csv:101225152|csv:101228587|csv:101217907|csv:101212230|csv:101218156|csv:101213629|csv:101221846|	101210868|101206860|101231189|101211752|101218595|101229976|101204648|101211442|101213059|101215427|101228067|101229213|101204747|101224303|101206890|101215428|101217299|101225152|101228587|101217907|101212230|101218156|101213629|101221846|	http://www.genome.jp/kegg-bin/show_pathway?csv00360/csv:101211442%09red/csv:101229976%09red/csv:101231189%09red/csv:101218156%09red/csv:101225152%09red/csv:101204648%09red/csv:101206860%09red/csv:101212230%09red/csv:101215427%09red/csv:101217299%09red/csv:101228067%09red/csv:101215428%09red/csv:101217907%09red/csv:101206890%09red/csv:101213059%09red/csv:101211752%09red/csv:101221846%09red/csv:101…
Sphingolipid metabolism	KEGG PATHWAY	csv00600	5	34	0.576579	0.92203	Csa5G580630|Csa5G649350|Csa1G073750|Csa3G149900|Csa2G130670	csv:101211924|csv:101204709|csv:101224821|csv:101208848|csv:101228154|	101211924|101204709|101224821|101208848|101228154|	http://www.genome.jp/kegg-bin/show_pathway?csv00600/csv:101208848%09red/csv:101204709%09red/csv:101211924%09red/csv:101228154%09red/csv:101224821%09red
One carbon pool by folate	KEGG PATHWAY	csv00670	4	27	0.579126	0.92203	Csa2G145880|Csa4G377740|Csa1G604600|Csa2G248730	csv:101215910|csv:101215287|csv:101227814|csv:101226379|	101215910|101215287|101227814|101226379|	http://www.genome.jp/kegg-bin/show_pathway?csv00670/csv:101227814%09red/csv:101215287%09red/csv:101215910%09red/csv:101226379%09red
Selenocompound metabolism	KEGG PATHWAY	csv00450	4	27	0.579126	0.92203	Csa3G872050|Csa3G113310|Csa3G822260|Csa3G842030	csv:101217416|csv:101211867|csv:101229106|csv:101224620|	101217416|101211867|101229106|101224620|	http://www.genome.jp/kegg-bin/show_pathway?csv00450/csv:101217416%09red/csv:101224620%09red/csv:101211867%09red/csv:101229106%09red
Taurine and hypotaurine metabolism	KEGG PATHWAY	csv00430	2	13	0.593628	0.932843	Csa1G031730|Csa5G348050	csv:101210903|csv:101231718|	101210903|101231718|	http://www.genome.jp/kegg-bin/show_pathway?csv00430/csv:101231718%09red/csv:101210903%09red
Fatty acid metabolism	KEGG PATHWAY	csv01212	16	113	0.604928	0.938413	Csa4G286380|Csa4G092990|Csa5G396020|Csa4G051550|Csa1G051630|Csa3G019340|Csa4G006050|Csa7G031600|Csa4G438530|Csa2G350250|Csa3G114430|Csa2G005370|Csa2G350440|Csa5G207960|Csa1G397120|Csa3G808360	csv:101210519|csv:101222930|csv:101212380|csv:101225233|csv:101218502|csv:101222043|csv:101225014|csv:101212158|csv:101226954|csv:101230976|csv:101229253|csv:101206509|csv:101224010|csv:101223135|csv:101210955|csv:101222623|	101210519|101222930|101212380|101225233|101218502|101222043|101225014|101212158|101226954|101230976|101229253|101206509|101224010|101223135|101210955|101222623|	http://www.genome.jp/kegg-bin/show_pathway?csv01212/csv:101225233%09red/csv:101230976%09red/csv:101218502%09red/csv:101222043%09red/csv:101223135%09red/csv:101224010%09red/csv:101210955%09red/csv:101222930%09red/csv:101222623%09red/csv:101206509%09red/csv:101212158%09red/csv:101210519%09red/csv:101226954%09red/csv:101212380%09red/csv:101229253%09red/csv:101225014%09red
Protein processing in endoplasmic reticulum	KEGG PATHWAY	csv04141	37	261	0.622753	0.953258	Csa4G637750|Csa6G509680|Csa7G011870|Csa5G197110|Csa3G358610|Csa6G128040|Csa3G183950|Csa1G294620|Csa6G133760|Csa3G483810|Csa5G197120|Csa3G829070|Csa5G190550|Csa7G407520|Csa1G527870|Csa2G011510|Csa2G070310|Csa4G296190|Csa6G421760|Csa7G407630|Csa2G346050|Csa2G368880|Csa5G589980|Csa3G806220|Csa3G733220|Csa1G527880|Csa7G072770|Csa2G033940|Csa6G446420|Csa5G514500|Csa5G139060|Csa6G383520|Csa1G642540|Csa…	csv:101227947|csv:101215649|csv:101207672|csv:101226221|csv:101228054|csv:101223297|csv:101223769|csv:101222431|csv:101224675|csv:101222273|csv:101226001|csv:101220930|csv:101225172|csv:101202981|csv:101204421|csv:101221843|csv:101215564|csv:101230285|csv:101211982|csv:101221276|csv:101217906|csv:101231900|csv:101210818|csv:101220497|csv:101219630|csv:101203931|csv:101220889|csv:101205515|csv:101…	101227947|101215649|101207672|101226221|101228054|101223297|101223769|101222431|101224675|101222273|101226001|101220930|101225172|101202981|101204421|101221843|101215564|101230285|101211982|101221276|101217906|101231900|101210818|101220497|101219630|101203931|101220889|101205515|101220994|101211905|101207924|101230283|101205422|101219106|101205406|101224186|101210925|	http://www.genome.jp/kegg-bin/show_pathway?csv04141/csv:101222273%09red/csv:101224186%09red/csv:101223297%09red/csv:101225172%09red/csv:101205515%09red/csv:101211905%09red/csv:101215564%09red/csv:101204421%09red/csv:101219106%09red/csv:101203931%09red/csv:101217906%09red/csv:101220497%09red/csv:101215649%09red/csv:101210925%09red/csv:101226221%09red/csv:101219630%09red/csv:101202981%09red/csv:101…
Propanoate metabolism	KEGG PATHWAY	csv00640	4	29	0.630254	0.953258	Csa4G438530|Csa3G253500|Csa4G092990|Csa5G396020	csv:101226954|csv:101203579|csv:101222930|csv:101212380|	101226954|101203579|101222930|101212380|	http://www.genome.jp/kegg-bin/show_pathway?csv00640/csv:101222930%09red/csv:101226954%09red/csv:101203579%09red/csv:101212380%09red
Purine metabolism	KEGG PATHWAY	csv00230	29	208	0.647358	0.959665	Novel00558|Csa1G056970|Csa6G405970|Csa5G590070|Csa6G151760|Csa3G597320|Csa3G904100|Csa2G252070|Csa1G434690|Csa1G613540|Csa3G872050|Csa5G568310|Csa5G647410|Csa4G310720|Csa4G000560|Csa6G486750|Csa5G613510|Csa3G142980|Csa4G626090|Csa2G008770|Csa1G047440|Csa1G435200|Csa6G476130|Csa2G381870|Csa3G588530|Csa5G157250|Csa5G153080|Csa1G039840|Csa3G822200	csv:101212145|csv:101218185|csv:101203595|csv:101209590|csv:101208568|csv:101222416|csv:101223065|csv:101203840|csv:101207444|csv:101211977|csv:101217416|csv:101218883|csv:101203146|csv:101230385|csv:101220786|csv:101210105|csv:101206975|csv:101230687|csv:101228942|csv:101203230|csv:101207870|csv:101229011|csv:101219332|csv:101231851|csv:101217918|csv:101208090|csv:101217911|csv:101226281|csv:101…	101212145|101218185|101203595|101209590|101208568|101222416|101223065|101203840|101207444|101211977|101217416|101218883|101203146|101230385|101220786|101210105|101206975|101230687|101228942|101203230|101207870|101229011|101219332|101231851|101217918|101208090|101217911|101226281|101227010|	http://www.genome.jp/kegg-bin/show_pathway?csv00230/csv:101228942%09red/csv:101223065%09red/csv:101203230%09red/csv:101207870%09red/csv:101229011%09red/csv:101227010%09red/csv:101217416%09red/csv:101203595%09red/csv:101210105%09red/csv:101219332%09red/csv:101218883%09red/csv:101208568%09red/csv:101206975%09red/csv:101212145%09red/csv:101209590%09red/csv:101226281%09red/csv:101230385%09red/csv:101…
Zeatin biosynthesis	KEGG PATHWAY	csv00908	4	30	0.654266	0.959665	Csa4G343590|Csa4G083690|Csa3G271920|Csa4G647490	csv:101222887|csv:101231446|csv:101213604|csv:101217899|	101222887|101231446|101213604|101217899|	http://www.genome.jp/kegg-bin/show_pathway?csv00908/csv:101217899%09red/csv:101231446%09red/csv:101222887%09red/csv:101213604%09red
Glycosphingolipid biosynthesis - ganglio series	KEGG PATHWAY	csv00604	1	7	0.6684	0.959665	Csa5G180280	csv:101202942|	101202942|	http://www.genome.jp/kegg-bin/show_pathway?csv00604/csv:101202942%09red
Synthesis and degradation of ketone bodies	KEGG PATHWAY	csv00072	1	7	0.6684	0.959665	Csa6G429100	csv:101203798|	101203798|	http://www.genome.jp/kegg-bin/show_pathway?csv00072/csv:101203798%09red
Phenylalanine, tyrosine and tryptophan biosynthesis	KEGG PATHWAY	csv00400	9	68	0.674145	0.959665	Csa2G382520|Csa6G151110|Csa2G369040|Csa6G487590|Csa3G073840|Csa4G629470|Csa1G096620|Csa7G064020|Csa1G046170	csv:101225152|csv:101205753|csv:101228752|csv:101229034|csv:101230829|csv:101231189|csv:101217299|csv:101221603|csv:101204330|	101225152|101205753|101228752|101229034|101230829|101231189|101217299|101221603|101204330|	http://www.genome.jp/kegg-bin/show_pathway?csv00400/csv:101231189%09red/csv:101205753%09red/csv:101229034%09red/csv:101230829%09red/csv:101225152%09red/csv:101228752%09red/csv:101217299%09red/csv:101221603%09red/csv:101204330%09red
Glycine, serine and threonine metabolism	KEGG PATHWAY	csv00260	14	106	0.69578	0.975623	Csa3G651740|Csa6G423980|Csa4G036590|Csa7G446950|Csa5G021870|Csa5G158570|Csa2G000280|Csa6G449240|Csa1G006270|Csa6G308420|Csa1G617370|Csa2G145880|Csa4G377740|Csa6G151120	csv:101219910|csv:101229213|csv:101208662|csv:101220438|csv:101206329|csv:101213059|csv:101226430|csv:101205909|csv:101230214|csv:101209306|csv:101217893|csv:101215910|csv:101215287|csv:101205520|	101219910|101229213|101208662|101220438|101206329|101213059|101226430|101205909|101230214|101209306|101217893|101215910|101215287|101205520|	http://www.genome.jp/kegg-bin/show_pathway?csv00260/csv:101208662%09red/csv:101215910%09red/csv:101205909%09red/csv:101220438%09red/csv:101230214%09red/csv:101205520%09red/csv:101229213%09red/csv:101213059%09red/csv:101217893%09red/csv:101226430%09red/csv:101219910%09red/csv:101209306%09red/csv:101215287%09red/csv:101206329%09red
Glycolysis / Gluconeogenesis	KEGG PATHWAY	csv00010	21	157	0.701481	0.975623	Csa1G005520|Csa4G050850|Csa7G239010|Csa6G136020|Csa6G151120|Csa2G009470|Csa3G827250|Csa4G000560|Csa6G308420|Csa4G361890|Csa5G603950|Csa4G361880|Csa7G284430|Csa4G291370|Csa6G042490|Csa3G253500|Csa5G568310|Csa1G574970|Csa4G046840|Csa1G050250|Csa7G322060	csv:101209430|csv:101205699|csv:101229073|csv:101226860|csv:101205520|csv:101208699|csv:101226474|csv:101220786|csv:101209306|csv:101224400|csv:101208773|csv:101224178|csv:101215151|csv:101205263|csv:101205576|csv:101203579|csv:101218883|csv:101227105|csv:101207518|csv:101226669|csv:101206036|	101209430|101205699|101229073|101226860|101205520|101208699|101226474|101220786|101209306|101224400|101208773|101224178|101215151|101205263|101205576|101203579|101218883|101227105|101207518|101226669|101206036|	http://www.genome.jp/kegg-bin/show_pathway?csv00010/csv:101226474%09red/csv:101226669%09red/csv:101224178%09red/csv:101208699%09red/csv:101205263%09red/csv:101208773%09red/csv:101205699%09red/csv:101206036%09red/csv:101209306%09red/csv:101215151%09red/csv:101218883%09red/csv:101205520%09red/csv:101227105%09red/csv:101220786%09red/csv:101203579%09red/csv:101229073%09red/csv:101224400%09red/csv:101…
Cysteine and methionine metabolism	KEGG PATHWAY	csv00270	16	122	0.712701	0.979964	Csa1G604080|Csa2G382520|Csa5G021870|Csa1G574800|Csa6G497060|Csa3G842030|Csa3G769110|Csa3G006640|Csa2G222050|Csa1G005540|Csa3G604620|Csa4G629470|Csa3G822260|Csa1G096620|Csa5G589260|Csa6G509570	csv:101218956|csv:101225152|csv:101206329|csv:101219222|csv:101225691|csv:101224620|csv:101213467|csv:101207925|csv:101204622|csv:101210007|csv:101212743|csv:101231189|csv:101229106|csv:101217299|csv:101230960|csv:101231382|	101218956|101225152|101206329|101219222|101225691|101224620|101213467|101207925|101204622|101210007|101212743|101231189|101229106|101217299|101230960|101231382|	http://www.genome.jp/kegg-bin/show_pathway?csv00270/csv:101224620%09red/csv:101231189%09red/csv:101219222%09red/csv:101225691%09red/csv:101213467%09red/csv:101231382%09red/csv:101204622%09red/csv:101229106%09red/csv:101225152%09red/csv:101207925%09red/csv:101210007%09red/csv:101218956%09red/csv:101212743%09red/csv:101230960%09red/csv:101217299%09red/csv:101206329%09red
Inositol phosphate metabolism	KEGG PATHWAY	csv00562	9	72	0.732143	0.995386	Csa7G258840|Csa2G245420|Csa2G361850|Csa6G011650|Csa7G206930|Csa1G662800|Csa3G824810|Csa6G500600|Csa1G575130	csv:101215702|csv:101224126|csv:101214357|csv:101203631|csv:101202759|csv:101211666|csv:101222304|csv:101230587|csv:101228253|	101215702|101224126|101214357|101203631|101202759|101211666|101222304|101230587|101228253|	http://www.genome.jp/kegg-bin/show_pathway?csv00562/csv:101228253%09red/csv:101230587%09red/csv:101222304%09red/csv:101224126%09red/csv:101215702%09red/csv:101211666%09red/csv:101202759%09red/csv:101214357%09red/csv:101203631%09red
Linoleic acid metabolism	KEGG PATHWAY	csv00591	4	35	0.758152	1	Csa4G358630|Csa4G288610|Csa2G028490|Csa2G028500	csv:101220288|csv:101228070|csv:101206327|csv:101206327|	101220288|101228070|101206327|101206327|	http://www.genome.jp/kegg-bin/show_pathway?csv00591/csv:101206327%09red/csv:101220288%09red/csv:101228070%09red
ABC transporters	KEGG PATHWAY	csv02010	3	27	0.761767	1	Csa6G521010|Csa3G901080|Csa3G710840	csv:101210649|csv:101219304|csv:101211576|	101210649|101219304|101211576|	http://www.genome.jp/kegg-bin/show_pathway?csv02010/csv:101211576%09red/csv:101219304%09red/csv:101210649%09red
Fatty acid degradation	KEGG PATHWAY	csv00071	7	59	0.763208	1	Csa1G005520|Csa4G361890|Csa7G322060|Csa4G051550|Csa7G031600|Csa4G291370|Csa4G361880	csv:101209430|csv:101224400|csv:101206036|csv:101225233|csv:101212158|csv:101205263|csv:101224178|	101209430|101224400|101206036|101225233|101212158|101205263|101224178|	http://www.genome.jp/kegg-bin/show_pathway?csv00071/csv:101225233%09red/csv:101205263%09red/csv:101206036%09red/csv:101212158%09red/csv:101224400%09red/csv:101224178%09red/csv:101209430%09red
Folate biosynthesis	KEGG PATHWAY	csv00790	3	29	0.799557	1	Csa2G248730|Csa3G895790|Csa4G026280	csv:101226379|csv:101216383|csv:101223896|	101226379|101216383|101223896|	http://www.genome.jp/kegg-bin/show_pathway?csv00790/csv:101216383%09red/csv:101226379%09red/csv:101223896%09red
Non-homologous end-joining	KEGG PATHWAY	csv03450	1	11	0.809094	1	Csa1G561390	csv:101204273|	101204273|	http://www.genome.jp/kegg-bin/show_pathway?csv03450/csv:101204273%09red
Phagosome	KEGG PATHWAY	csv04145	12	102	0.812942	1	Csa2G368830|Csa1G629200|Csa1G294620|Csa3G732650|Csa1G662800|Csa7G206930|Csa2G345950|Csa4G000580|Csa4G307390|Csa3G008910|Csa2G270750|Csa2G033940	csv:101204817|csv:101228235|csv:101222431|csv:101218443|csv:101211666|csv:101202759|csv:101216083|csv:101221020|csv:101210703|csv:101207682|csv:101219263|csv:101205515|	101204817|101228235|101222431|101218443|101211666|101202759|101216083|101221020|101210703|101207682|101219263|101205515|	http://www.genome.jp/kegg-bin/show_pathway?csv04145/csv:101219263%09red/csv:101228235%09red/csv:101207682%09red/csv:101210703%09red/csv:101216083%09red/csv:101205515%09red/csv:101211666%09red/csv:101221020%09red/csv:101204817%09red/csv:101218443%09red/csv:101202759%09red/csv:101222431%09red
Photosynthesis - antenna proteins	KEGG PATHWAY	csv00196	3	31	0.832187	1	Csa3G099680|Csa1G033310|Csa7G033300	csv:101223835|csv:101227074|csv:101228424|	101223835|101227074|101228424|	http://www.genome.jp/kegg-bin/show_pathway?csv00196/csv:101228424%09red/csv:101223835%09red/csv:101227074%09red
Pyrimidine metabolism	KEGG PATHWAY	csv00240	19	160	0.847788	1	Csa6G151760|Csa1G434690|Csa6G486750|Csa7G370750|Csa5G456730|Csa2G248730|Csa3G822200|Csa6G483490|Csa3G597320|Novel00558|Csa7G407510|Csa4G626090|Csa1G039840|Csa1G616850|Csa1G571860|Csa5G647410|Csa1G435200|Csa6G476130|Csa3G176280	csv:101208568|csv:101207444|csv:101210105|csv:101230068|csv:101220596|csv:101226379|csv:101227010|csv:101221565|csv:101222416|csv:101212145|csv:101203215|csv:101228942|csv:101226281|csv:101217190|csv:101212533|csv:101203146|csv:101229011|csv:101219332|csv:101217681|	101208568|101207444|101210105|101230068|101220596|101226379|101227010|101221565|101222416|101212145|101203215|101228942|101226281|101217190|101212533|101203146|101229011|101219332|101217681|	http://www.genome.jp/kegg-bin/show_pathway?csv00240/csv:101228942%09red/csv:101203215%09red/csv:101221565%09red/csv:101207444%09red/csv:101226379%09red/csv:101212145%09red/csv:101230068%09red/csv:101208568%09red/csv:101220596%09red/csv:101229011%09red/csv:101227010%09red/csv:101226281%09red/csv:101217190%09red/csv:101222416%09red/csv:101212533%09red/csv:101217681%09red/csv:101203146%09red/csv:101…
Glyoxylate and dicarboxylate metabolism	KEGG PATHWAY	csv00630	8	75	0.854681	1	Csa4G377740|Csa7G446950|Csa6G507310|Csa1G617370|Csa2G145880|Csa6G497060|Csa4G658590|Csa1G654900	csv:101215287|csv:101220438|csv:101217715|csv:101217893|csv:101215910|csv:101225691|csv:101202931|csv:101230478|	101215287|101220438|101217715|101217893|101215910|101225691|101202931|101230478|	http://www.genome.jp/kegg-bin/show_pathway?csv00630/csv:101217715%09red/csv:101215910%09red/csv:101225691%09red/csv:101215287%09red/csv:101202931%09red/csv:101230478%09red/csv:101220438%09red/csv:101217893%09red
Biosynthesis of unsaturated fatty acids	KEGG PATHWAY	csv01040	6	59	0.859356	1	Csa4G006050|Csa2G350250|Csa3G114430|Csa2G350440|Csa5G207960|Csa3G808360	csv:101225014|csv:101230976|csv:101229253|csv:101224010|csv:101223135|csv:101222623|	101225014|101230976|101229253|101224010|101223135|101222623|	http://www.genome.jp/kegg-bin/show_pathway?csv01040/csv:101230976%09red/csv:101223135%09red/csv:101224010%09red/csv:101222623%09red/csv:101229253%09red/csv:101225014%09red
Brassinosteroid biosynthesis	KEGG PATHWAY	csv00905	1	15	0.89011	1	Csa6G504590	csv:101203911|	101203911|	http://www.genome.jp/kegg-bin/show_pathway?csv00905/csv:101203911%09red
Homologous recombination	KEGG PATHWAY	csv03440	6	63	0.894577	1	Csa1G046000|Csa5G614640|Csa6G476130|Csa3G207350|Csa4G626090|Csa1G013800	csv:101221888|csv:101229844|csv:101219332|csv:101227430|csv:101228942|csv:101208545|	101221888|101229844|101219332|101227430|101228942|101208545|	http://www.genome.jp/kegg-bin/show_pathway?csv03440/csv:101221888%09red/csv:101228942%09red/csv:101227430%09red/csv:101229844%09red/csv:101208545%09red/csv:101219332%09red
Ubiquitin mediated proteolysis	KEGG PATHWAY	csv04120	16	145	0.896079	1	Csa5G152970|Csa6G148230|Csa6G185330|Csa7G011870|Csa2G346050|Csa3G358610|Csa1G699620|Csa7G394010|Csa5G208480|Csa3G736800|Csa6G133760|Csa6G344280|Csa1G045930|Csa6G448100|Csa6G161200|Csa3G914590	csv:101228382|csv:101221553|csv:101212319|csv:101207672|csv:101217906|csv:101228054|csv:101203654|csv:101227736|csv:101222904|csv:101211492|csv:101224675|csv:101224575|csv:101221105|csv:101229064|csv:101210608|csv:101214341|	101228382|101221553|101212319|101207672|101217906|101228054|101203654|101227736|101222904|101211492|101224675|101224575|101221105|101229064|101210608|101214341|	http://www.genome.jp/kegg-bin/show_pathway?csv04120/csv:101228054%09red/csv:101217906%09red/csv:101221553%09red/csv:101211492%09red/csv:101222904%09red/csv:101207672%09red/csv:101228382%09red/csv:101212319%09red/csv:101229064%09red/csv:101221105%09red/csv:101224675%09red/csv:101214341%09red/csv:101203654%09red/csv:101224575%09red/csv:101210608%09red/csv:101227736%09red
Sulfur relay system	KEGG PATHWAY	csv04122	1	16	0.904285	1	Csa6G497010	csv:101218146|	101218146|	http://www.genome.jp/kegg-bin/show_pathway?csv04122/csv:101218146%09red
Pentose and glucuronate interconversions	KEGG PATHWAY	csv00040	13	138	0.961451	1	Csa1G005520|Csa5G622520|Csa5G568300|Csa1G597780|Csa6G404190|Csa7G343850|Csa4G291370|Csa4G361880|Csa4G361890|Csa7G007830|Csa2G049960|Csa7G405320|Csa6G376260	csv:101209430|csv:101205739|csv:101219120|csv:101214012|csv:101207268|csv:101221055|csv:101205263|csv:101224178|csv:101224400|csv:101214993|csv:101209640|csv:101205557|csv:101202798|	101209430|101205739|101219120|101214012|101207268|101221055|101205263|101224178|101224400|101214993|101209640|101205557|101202798|	http://www.genome.jp/kegg-bin/show_pathway?csv00040/csv:101205263%09red/csv:101214012%09red/csv:101205557%09red/csv:101214993%09red/csv:101202798%09red/csv:101207268%09red/csv:101224400%09red/csv:101219120%09red/csv:101224178%09red/csv:101209640%09red/csv:101205739%09red/csv:101221055%09red/csv:101209430%09red
alpha-Linolenic acid metabolism	KEGG PATHWAY	csv00592	5	68	0.966797	1	Csa4G358630|Novel00534|Csa7G075590|Csa4G288610|Csa6G503370	csv:101220288|csv:101218965|csv:101223726|csv:101228070|csv:101202849|	101220288|101218965|101223726|101228070|101202849|	http://www.genome.jp/kegg-bin/show_pathway?csv00592/csv:101202849%09red/csv:101218965%09red/csv:101220288%09red/csv:101228070%09red/csv:101223726%09red
Basal transcription factors	KEGG PATHWAY	csv03022	3	49	0.971278	1	Csa7G390020|Csa6G452070|Csa2G383360	csv:101205132|csv:101226357|csv:101228914|	101205132|101226357|101228914|	http://www.genome.jp/kegg-bin/show_pathway?csv03022/csv:101228914%09red/csv:101205132%09red/csv:101226357%09red
Ribosome biogenesis in eukaryotes	KEGG PATHWAY	csv03008	9	116	0.985227	1	Csa3G821550|Csa1G181280|Csa1G569520|Csa3G821570|Csa3G127810|Csa6G486930|Csa2G012150|Novel00352|Csa5G290150	csv:101219867|csv:101216227|csv:101207707|csv:101220343|csv:101204423|csv:101208150|csv:101218843|csv:101221716|csv:101206925|	101219867|101216227|101207707|101220343|101204423|101208150|101218843|101221716|101206925|	http://www.genome.jp/kegg-bin/show_pathway?csv03008/csv:101207707%09red/csv:101220343%09red/csv:101221716%09red/csv:101218843%09red/csv:101208150%09red/csv:101204423%09red/csv:101206925%09red/csv:101216227%09red/csv:101219867%09red
mRNA surveillance pathway	KEGG PATHWAY	csv03015	11	140	0.990186	1	Csa6G095890|Csa7G450750|Csa1G042640|Csa4G280520|Csa7G428960|Csa2G379260|Csa3G209450|Csa2G005870|Csa2G074280|Csa6G052760|Csa4G551660	csv:101215358|csv:101220676|csv:101217340|csv:101216235|csv:101222300|csv:101203139|csv:101216563|csv:101206275|csv:101220950|csv:101219081|csv:101204474|	101215358|101220676|101217340|101216235|101222300|101203139|101216563|101206275|101220950|101219081|101204474|	http://www.genome.jp/kegg-bin/show_pathway?csv03015/csv:101222300%09red/csv:101206275%09red/csv:101204474%09red/csv:101219081%09red/csv:101217340%09red/csv:101215358%09red/csv:101220676%09red/csv:101220950%09red/csv:101216235%09red/csv:101203139%09red/csv:101216563%09red
Photosynthesis	KEGG PATHWAY	csv00195	7	103	0.991261	1	Csa3G222790|Csa3G119340|Csa6G525340|Csa3G902950|Csa1G163160|Csa7G267900|Csa6G513760	csv:101204727|csv:101203855|csv:101223625|csv:101221013|csv:101227930|csv:101206477|csv:101218747|	101204727|101203855|101223625|101221013|101227930|101206477|101218747|	http://www.genome.jp/kegg-bin/show_pathway?csv00195/csv:101227930%09red/csv:101223625%09red/csv:101221013%09red/csv:101203855%09red/csv:101218747%09red/csv:101204727%09red/csv:101206477%09red
RNA degradation	KEGG PATHWAY	csv03018	10	133	0.991832	1	Csa6G095890|Csa7G428960|Csa6G405350|Csa7G451310|Csa5G611030|Csa6G052760|Csa7G041980|Csa5G607990|Csa2G012150|Csa1G004330	csv:101215358|csv:101222300|csv:101230189|csv:101224600|csv:101208774|csv:101219081|csv:101222894|csv:101209342|csv:101218843|csv:101207820|	101215358|101222300|101230189|101224600|101208774|101219081|101222894|101209342|101218843|101207820|	http://www.genome.jp/kegg-bin/show_pathway?csv03018/csv:101222300%09red/csv:101224600%09red/csv:101218843%09red/csv:101230189%09red/csv:101208774%09red/csv:101219081%09red/csv:101209342%09red/csv:101207820%09red/csv:101215358%09red/csv:101222894%09red
SNARE interactions in vesicular transport	KEGG PATHWAY	csv04130	2	53	0.995419	1	Csa3G008910|Csa4G007010	csv:101207682|csv:101230028|	101207682|101230028|	http://www.genome.jp/kegg-bin/show_pathway?csv04130/csv:101207682%09red/csv:101230028%09red
Protein export	KEGG PATHWAY	csv03060	3	67	0.99595	1	Csa4G050230|Csa1G573670|Csa1G294620	csv:101222972|csv:101216624|csv:101222431|	101222972|101216624|101222431|	http://www.genome.jp/kegg-bin/show_pathway?csv03060/csv:101216624%09red/csv:101222431%09red/csv:101222972%09red
RNA transport	KEGG PATHWAY	csv03013	15	196	0.997578	1	Csa7G037660|Csa6G095890|Csa7G448790|Csa5G202340|Csa7G209580|Csa7G428960|Csa5G583270|Csa5G495940|Csa3G209450|Csa2G263950|Csa2G006200|Csa3G829070|Csa7G044260|Csa6G052760|Csa3G149360	csv:101230314|csv:101215358|csv:101207984|csv:101216348|csv:101202908|csv:101222300|csv:101219502|csv:101220517|csv:101216563|csv:101214334|csv:101230712|csv:101220930|csv:101224314|csv:101219081|csv:101230232|	101230314|101215358|101207984|101216348|101202908|101222300|101219502|101220517|101216563|101214334|101230712|101220930|101224314|101219081|101230232|	http://www.genome.jp/kegg-bin/show_pathway?csv03013/csv:101222300%09red/csv:101220930%09red/csv:101219502%09red/csv:101230712%09red/csv:101230314%09red/csv:101214334%09red/csv:101230232%09red/csv:101219081%09red/csv:101216348%09red/csv:101207984%09red/csv:101216563%09red/csv:101202908%09red/csv:101224314%09red/csv:101215358%09red/csv:101220517%09red
Endocytosis	KEGG PATHWAY	csv04144	10	149	0.997786	1	Csa3G077720|Csa2G070310|Csa5G514500|Csa7G452000|Csa2G401410|Csa5G512930|Csa6G517060|Csa5G118690|Csa3G006740|Csa4G004970	csv:101213237|csv:101215564|csv:101211905|csv:101228621|csv:101220030|csv:101210925|csv:101210407|csv:101218651|csv:101207111|csv:101215246|	101213237|101215564|101211905|101228621|101220030|101210925|101210407|101218651|101207111|101215246|	http://www.genome.jp/kegg-bin/show_pathway?csv04144/csv:101218651%09red/csv:101228621%09red/csv:101220030%09red/csv:101210407%09red/csv:101215246%09red/csv:101207111%09red/csv:101210925%09red/csv:101211905%09red/csv:101215564%09red/csv:101213237%09red
RNA polymerase	KEGG PATHWAY	csv03020	2	69	0.999371	1	Novel00558|Csa3G822200	csv:101212145|csv:101227010|	101212145|101227010|	http://www.genome.jp/kegg-bin/show_pathway?csv03020/csv:101227010%09red/csv:101212145%09red
Aminoacyl-tRNA biosynthesis	KEGG PATHWAY	csv00970	6	125	0.999618	1	Csa6G446550|Csa2G070890|Csa2G170810|Csa5G080790|Csa3G895100|Csa7G368100	csv:101223046|csv:101213236|csv:101209226|csv:101231838|csv:101219148|csv:101216192|	101223046|101213236|101209226|101231838|101219148|101216192|	http://www.genome.jp/kegg-bin/show_pathway?csv00970/csv:101219148%09red/csv:101223046%09red/csv:101216192%09red/csv:101231838%09red/csv:101209226%09red/csv:101213236%09red
Proteasome	KEGG PATHWAY	csv03050	2	73	0.99962	1	Csa1G046000|Csa3G045220	csv:101221888|csv:101205528|	101221888|101205528|	http://www.genome.jp/kegg-bin/show_pathway?csv03050/csv:101221888%09red/csv:101205528%09red
N-Glycan biosynthesis	KEGG PATHWAY	csv00510	1	60	0.999782	1	Csa5G589980	csv:101210818|	101210818|	http://www.genome.jp/kegg-bin/show_pathway?csv00510/csv:101210818%09red
Oxidative phosphorylation	KEGG PATHWAY	csv00190	12	228	0.999988	1	Csa1G008520|Csa1G045600|Csa3G119340|Csa3G184070|Csa6G095940|Novel00096|Csa2G378540|Csa6G513760|Csa3G128850|Csa2G378530|Csa5G576620|Csa4G293860	csv:101217264|csv:101214920|csv:101203855|csv:101209685|csv:101214636|csv:101221564|csv:101224777|csv:101218747|csv:101228332|csv:101224777|csv:101205618|csv:101217432|	101217264|101214920|101203855|101209685|101214636|101221564|101224777|101218747|101228332|101224777|101205618|101217432|	http://www.genome.jp/kegg-bin/show_pathway?csv00190/csv:101203855%09red/csv:101221564%09red/csv:101217264%09red/csv:101209685%09red/csv:101228332%09red/csv:101218747%09red/csv:101205618%09red/csv:101217432%09red/csv:101214920%09red/csv:101214636%09red/csv:101224777%09red
Spliceosome	KEGG PATHWAY	csv03040	8	208	0.999999	1	Csa1G569330|Csa3G881900|Csa2G070310|Csa1G145960|Csa1G013770|Csa4G623900|Csa5G514500|Csa5G512930	csv:101223011|csv:101217802|csv:101215564|csv:101221685|csv:101218446|csv:101204969|csv:101211905|csv:101210925|	101223011|101217802|101215564|101221685|101218446|101204969|101211905|101210925|	http://www.genome.jp/kegg-bin/show_pathway?csv03040/csv:101223011%09red/csv:101221685%09red/csv:101204969%09red/csv:101218446%09red/csv:101217802%09red/csv:101210925%09red/csv:101211905%09red/csv:101215564%09red
Ribosome	KEGG PATHWAY	csv03010	10	439	1	1	Csa3G121660|Csa6G365730|Csa7G274160|Novel00620|Csa3G127780|Csa1G530120|Csa3G769090|Csa3G128920|Csa2G295950|Csa4G095600	csv:101218820|csv:101205274|csv:101218252|csv:101220546|csv:101221429|csv:101203525|csv:101213702|csv:3429317|csv:101208580|csv:101220655|	101218820|101205274|101218252|101220546|101221429|101203525|101213702|3429317|101208580|101220655|	http://www.genome.jp/kegg-bin/show_pathway?csv03010/csv:101220546%09red/csv:101205274%09red/csv:101213702%09red/csv:101208580%09red/csv:101203525%09red/csv:101218252%09red/csv:3429317%09red/csv:101220655%09red/csv:101218820%09red/csv:101221429%09red
--------------------
#Term	Database	ID	Input number	Background number	P-Value	Corrected P-Value	Input	KEGG_ID/KO	Entrez_ID	Hyperlink
--------------------
#Term	Database	ID	Input number	Background number	P-Value	Corrected P-Value	Input	KEGG_ID/KO	Entrez_ID	Hyperlink
--------------------
