# Supplementary material for: Transcriptomic analysis reveals distinct resistant response by physcion and chrysophanol against cucumber powdery mildew
Source: PeerJ. 2016 May 17;4:e1991. doi: 10.7717/peerj.1991 (PMC4878370; doi:10.7717/peerj.1991)
Supplement: Table S8 [file peerj-04-1991-s011.xlsx]

## Sheet: list
					Supplementary Table 8. Functional candidate genes related to ‘defence’ in different treatment groups

## Sheet: Sheet1
Type	Chr vs Con	Phy vs Con	Phy×Chr vs Con	Total
Structural defence	3	9	14	17
Chemical defence	3	6	19	20
Signalling defence	9	23	53	62

## Sheet: Structural defense
		Chr vs Con			Phy vs Con			Phy×Chr vs Con
Structural defence	Gene_id	Log2FoldChange	pval	padj	Log2FoldChange	pval	padj	Log2FoldChange	pval	padj	Gene Annotation
protein ECERIFERUM	Csa3G892170	-0.37475	0.082663	0.99933	-0.43001	0.26726	0.99988	-1.9431	2.9292e-07	4.4234e-06	Protein ECERIFERUM 1
	Csa6G079750	-0.1859	0.5085	0.99933	1.9943	1.5624e-07	2.6155e-05	-2.4643	1.2021e-11	3.3909e-10	protein ECERIFERUM 1-like
	Csa1G294020	-0.085177	0.75712	0.99933	0.94661	0.0066451	0.13924	-2.01	7.9717e-16	3.4059e-14	protein ECERIFERUM 3-like
	Csa2G147920	0.11628	0.67512	0.99933	1.3033	0.0012308	0.04059	-1.4576	0.0022633	0.01318	Protein ECERIFERUM 26
	Csa2G011500	-0.12213	0.60102	0.99933	-0.4289	0.2513	0.99988	-1.6967	3.3085e-06	4.1426e-05	Protein ECERIFERUM 26-like
phenylalanine ammonia-lyase	Csa6G147460	-0.17078	0.54082	0.99933	0.024226	0.9535	0.99988	-2.0553	0.00046975	0.0034045	Phenylalanine ammonia-lyase
	Csa6G445240	-0.46814	0.029949	0.88837	-0.63702	0.040761	0.42532	-4.4206	6.4614e-28	6.6579e-26	phenylalanine ammonia-lyase 1
	Csa6G445750	-0.61236	0.023345	0.85833	-1.3714	0.00064863	0.025226	-0.78651	0.26372	0.48534	phenylalanine ammonia-lyase 1
	Csa6G405960	-0.0076182	0.97827	0.99933	-0.065392	0.87202	0.99988	-3.8824	1.5182e-12	4.7831e-11	phenylalanine ammonia-lyase 6
	Csa6G446290	-0.50779	0.068866	NA	-2.2184	2.544e-06	0.00029239	-1.2574	0.067703	0.19337	phenylalanine ammonia-lyase17.1
cinnamyl alcohol dehydrogenase	Csa3G199580	-0.42143	0.038187	0.98207	0.025118	0.92812	0.99988	-1.8253	1.4743e-05	0.00015922	cinnamyl alcohol dehydrogenase 1-like
	Csa7G071700	-0.35281	0.11236	0.99933	-1.6599	3.8552e-09	1.0417e-06	-0.39601	0.56552	0.75517	cinnamyl alcohol dehydrogenase 1-like
	Csa5G146280	-0.28911	0.19165	0.99933	-0.78244	0.015634	0.24395	-2.3753	2.6695e-14	9.9703e-13	probable cinnamyl alcohol dehydrogenase 1-like
	Csa3G874320	-0.3064	0.27636	0.99933	-0.075431	0.82601	0.99988	-2.7195	3.1533e-10	7.4024e-09	probable cinnamyl alcohol dehydrogenase 6-like
callose synthase	Csa7G429550	0.24624	0.12295	0.99933	-0.16173	0.53504	0.99988	0.89136	2.4148e-07	3.6975e-06	Callose synthase 1
	Csa2G302250	-0.26881	0.33909	NA	1.8957	2.0813e-05	0.0016931	-1.7805	0.0025156	0.01441	Callose synthase 5
	Csa1G073850	0.065597	0.80084	0.99933	0.23651	0.52217	0.99988	2.1172	1.3556e-11	3.8114e-10	callose synthase 11-like

## Sheet: Chemical defense
		Chr vs Con			Phy vs Con			Phy×Chr vs Con
Chemical defence	Gene_id	Log2FoldChange	pval	padj	Log2FoldChange	pval	padj	Log2FoldChange	pval	padj	Gene Annotation
pathogenesis-related protein	Csa1G420360	0.080046	0.61298	NA	1.6322	0.00083776	0.030334	1.7903	0.044716	0.14314	Pathogenesis-related protein PR-1
	Csa2G010380	0.095755	0.68001	NA	-0.43614	0.3571	NA	2.4433	1.218e-05	0.00013529	Pathogenesis-related protein P2
protease inhibitor	Csa7G372910	0.78495	0.004285	NA	0.59098	0.2302	0.99988	2.8482	1.6277e-07	2.585e-06	glu S.griseus protease inhibitor
chitinase	Csa6G509040	-0.4907	0.05469	NA	1.2442	0.006775	0.14158	3.0434	9.9234e-08	1.6353e-06	Probable acyl-activating enzyme 2
	Csa4G017110	0.22487	0.30019	0.99933	-0.89526	0.0019625	0.057353	0.79521	0.0066069	0.032124	Chitinase-like protein 1
	Csa3G166220	-0.04355	0.86754	NA	-0.92674	0.03197	0.37329	1.077	0.0017679	0.01069	Chitinase-like protein 2
	Csa6G509030	-0.14557	0.39923	NA	0.04981	0.90695	NA	2.6016	0.00025248	0.0019931	Endochitinase CH25
peroxidase	Csa4G285770	-0.28444	0.2528	0.99933	0.2891	0.41155	0.99988	2.21	6.543e-09	1.2792e-07	peroxidase 2
	Csa7G049140	0.50809	0.056683	0.99933	1.5849	2.1951e-07	3.4149e-05	1.4636	0.14949	0.33534	peroxidase 4
	Csa6G495000	0.44716	0.10371	0.99933	-0.52726	0.23798	0.99988	1.963	0.00019351	0.0015766	peroxidase 73
lipoxygenase	Csa4G288610	-0.098808	0.69575	NA	1.9949	4.3139e-06	0.0004489	4.8233	6.3259e-18	3.3681e-16	lipoxygenase 2-1
endonuclease	Csa3G847090	-0.14196	0.61393	NA	-0.80463	0.087373	0.67281	-2.8954	6.3649e-05	0.00058773	Ankyrin repeat-containing protein
	Csa4G001960	-0.33118	0.18419	0.99933	-0.45433	0.18962	0.94784	-0.91045	0.0096131	0.043478	Putative GTP diphosphokinase RSH1
	Csa1G072450	-0.59933	0.017141	0.79433	-0.75868	0.05242	0.49362	-3.9767	1.0168e-16	4.8009e-15	endonuclease 1-like
endoglucanase	Csa3G872070	-0.24564	0.34779	0.99933	-0.43288	0.25858	0.99988	-1.0761	0.00026953	0.0021037	endoglucanase 2
	Csa5G150400	-0.1175	0.64418	0.99933	-0.62311	0.093664	0.69866	-0.86837	0.005838	0.029028	endoglucanase 6
	Csa6G366400	-0.22557	0.40836	0.99933	-0.083564	0.83103	0.99988	-1.6294	4.13e-05	0.0004001	beta-glucosidase 40-like
LTP	Csa3G250900	-0.33833	0.22814	NA	-0.13473	0.77434	0.99988	-3.2639	3.9336e-06	4.8388e-05	lipid transfer-like protein VAS-like
Polyphenol oxidase	Csa1G073640	-0.84518	0.0026121	0.33344	-0.0012066	0.99761	0.99988	-4.063	1.3e-08	2.47e-07	polyphenol oxidase, chloroplastic-like
Superoxide dismutase	Csa3G038120	-0.00060533	0.99785	0.9995	0.47972	0.13303	0.82712	-1.1381	0.00010137	0.00089093	copper chaperone for superoxide dismutase-like

## Sheet: Signalling defense
		Chr vs Con			Phy vs Con			Phy×Chr vs Con
Signalling defence	Gene_id	Log2FoldChange	pval	padj	Log2FoldChange	pval	padj	Log2FoldChange	pval	padj	Gene Annotation
auxin-induced	Csa3G118740	-0.493	0.045663	0.99933	0.56233	0.080611	0.64413	-3.7125	6.6937e-36	1.1725e-33	Auxin-induced protein 15A
	Csa3G143580	-0.14318	0.60929	0.99933	-1.755	0.00026452	0.012613	-2.5357	0.0001435	0.0012141	Auxin-induced protein 22B
	Csa2G225320	-0.28551	0.25095	0.99933	-0.92287	0.013942	0.22856	-2.5186	4.8737e-08	8.3506e-07	Auxin-induced protein AUX28
auxin-responsive	Csa2G010920	0.039374	0.79969	0.99933	0.26224	0.36719	0.99988	-0.86208	1.3722e-05	0.00015014	Auxin-responsive protein IAA8
	Csa1G231530	-0.41105	0.090474	0.99933	-0.11487	0.75123	0.99988	-1.5154	3.8278e-05	0.00037417	Auxin-responsive protein IAA11
	Csa2G200440	-0.39861	0.026232	0.87671	0.4375	0.27293	0.99988	-2.4384	2.7178e-08	4.8678e-07	Auxin-responsive protein IAA12
	Csa3G610800	-0.056043	0.7859	0.99933	-0.12734	0.68368	0.99988	-1.2149	0.00032229	0.0024535	Auxin-responsive protein IAA14
Brassinosteroid	Csa7G060160	-0.1571	0.53214	0.99933	-0.27822	0.43969	0.99988	1.4032	1.1684e-07	1.9074e-06	BRASSINOSTEROID INSENSITIVE 1-associated receptor kinase 1
	Novel00616	0.55982	0.032659	NA	1.6283	0.00095141	0.033762	2.7123	4.5571e-07	6.6801e-06	BRASSINOSTEROID INSENSITIVE 1-associated receptor kinase 1
	Novel00628	0.22729	0.41927	NA	1.1149	0.017621	0.26145	1.7344	0.000347	0.0026177	BRASSINOSTEROID INSENSITIVE 1-associated receptor kinase 1
EDS	Csa1G006320	-0.51771	0.022394	0.83782	-0.8441	0.014557	0.2331	0.91581	0.021074	0.080172	enhanced disease susceptibility 1 protein
EDR	Csa4G651740	-0.35944	0.18172	NA	-0.33346	0.49873	NA	-2.6926	0.0042024	0.022202	enhanced disease resistance 2-like protein (EDR2L)
Redox	Csa1G569450	0.53057	0.048558	NA	-0.36717	0.44153	NA	3.4888	1.18e-10	2.978e-09	respiratory burst oxidase homolog protein B-like
	Csa3G845500	-0.13397	0.50042	0.99933	0.63076	0.036572	0.40289	1.2699	1.7961e-05	0.00019033	respiratory burst oxidase homolog protein C-like
Calcium	Csa2G007990	-0.47052	0.05336	0.99933	1.5992	1.7685e-08	4.0651e-06	-0.96397	0.00031265	0.0023906	calmodulin-like protein 4-like
	Csa3G130890	-0.0069961	0.97661	0.99933	0.25646	0.46556	0.99988	2.3152	1.3619e-22	1.0239e-20	probable calcium-binding protein CML22-like
	Csa3G077600	0.28119	0.10077	0.99933	-0.084945	0.75848	0.99988	1.3288	8.5747e-14	3.0843e-12	calcium-dependent protein kinase-like
	Csa7G026240	-0.090773	0.59213	0.99933	-0.026376	0.92021	0.99988	0.58507	0.00036034	0.0027021	calcium-dependent protein kinase 4-like
	Csa1G614120	0.16727	0.39763	0.99933	0.25164	0.38345	0.99988	0.92751	5.2929e-05	0.00049927	calcium-dependent protein kinase 8-like
	Csa7G274170	0.038282	0.83767	0.99933	-0.046856	0.86841	0.99988	0.83275	4.5341e-05	0.00043496	calcium-dependent protein kinase 11-like
	Csa6G513780	0.033554	0.87988	0.99933	-0.62575	0.055266	0.51165	1.0701	0.00030673	0.0023504	calcium-dependent protein kinase 21-like
	Csa4G050200	0.16556	0.38312	0.99933	-0.32301	0.28592	0.99988	0.76728	0.010079	0.045108	CDPK5; calcium-dependent protein kinase 3-like
ethylene-responsive	Csa1G042290	0.2865	0.14509	0.99933	0.19128	0.48891	0.99988	1.2876	2.765e-09	5.7252e-08	ethylene-responsive transcription factor CRF4-like
	Csa2G382550	0.31261	0.11851	NA	0.14687	0.62424	NA	2.6792	0.0030488	0.016927	ethylene-responsive transcription factor ERF003-like
	Csa1G597730	-0.18982	0.45117	NA	1.8609	7.7185e-05	0.0047323	-0.85658	0.29805	0.52345	ethylene-responsive transcription factor ERF017-like
	Csa4G023020	0.75685	0.0019758	0.29536	-0.21915	0.4791	0.99988	1.8085	1.6624e-06	2.2085e-05	ethylene-responsive transcription factor ERF104-like
	Csa3G133130	-0.17465	0.4714	0.99933	0.070958	0.84392	0.99988	1.1325	0.00014337	0.0012139	ethylene-responsive transcription factor ERF118-like
	Csa4G630010	-0.1118	0.69092	NA	2.407	1.1566e-09	3.9585e-07	-0.28607	0.55859	0.7495	ethylene-responsive transcription factor 4-like
	Csa5G167120	-0.068319	0.74633	0.99933	1.0933	0.00011107	0.0063829	0.25151	0.46262	0.67336	ethylene-responsive transcription factor 5-like
	Csa3G018320	0.1051	0.68229	0.99933	1.1544	0.00015395	0.008319	0.45146	0.40244	0.62382	ethylene-responsive transcription factor 6-like
	Csa1G075060	-0.535	0.055879	NA	1.9494	3.1731e-07	4.8868e-05	-4.3435	2.9739e-13	1.0057e-11	ethylene-responsive transcription factor 9-like
	Csa1G075030	0.50267	0.071956	NA	-0.46607	0.3443	NA	3.389	1.6808e-16	7.7075e-15	ethylene-responsive transcription factor 12-like
WRKY	Csa1G657480	0.26627	0.22701	NA	0.49318	0.26312	NA	2.9485	7.1557e-05	0.0006525	probable WRKY transcription factor 2-like
	Csa3G710870	-0.67607	0.0020403	0.30104	1.1181	5.1844e-05	0.0035047	0.046297	0.93794	0.97253	probable WRKY transcription factor 40-like
	Csa3G119700	-0.43995	0.051201	0.99933	2.0886	5.4009e-14	5.5453e-11	-0.98692	0.017545	0.069454	WRKY50; probable WRKY transcription factor 46-like
	Csa5G223070	0.11664	0.67468	0.99933	-0.79715	0.066429	0.57091	1.7211	0.00097049	0.0063862	WRKY34; probable WRKY transcription factor 54-like
MADS-box	Csa4G181200	-0.21954	0.37744	NA	-0.27895	0.55325	NA	2.4785	1.5855e-06	2.1184e-05	MADS-box transcription factor 27-like
MYB	Csa4G641690	0.10347	0.62329	0.99933	1.3235	6.9754e-05	0.004367	-0.11271	0.7932	0.90136	transcription factor MYB44-like
	Csa5G641610	-0.035064	0.75806	NA	2.1942	7.9316e-06	0.00076827	-1.0539	0.22595	NA	transcription factor MYB59-like
	Csa7G413890	-0.026511	0.92104	NA	1.4646	0.0023387	0.065805	-0.52893	0.41822	0.63598	transcription factor MYB75-like
	Csa1G561370	-0.1015	0.66759	NA	-0.4047	0.39856	NA	1.9506	0.0024083	0.013877	Transcription factor MYB86
	Csa3G019390	0.12421	0.44552	0.99933	0.2617	0.34899	0.99988	0.61388	0.00085258	0.0057111	transcription factor MYB1R1-like
NAC	Csa5G606310	0.04405	0.87431	0.99933	0.90197	0.020112	0.28209	-1.4661	0.0019204	0.011505	NAC transcription factor 29-like
	Csa4G011770	-0.2536	0.17802	0.99933	-0.042592	0.8799	0.99988	-1.2062	1.2213e-05	0.00013557	NAC transcription factor NAM-2-like
	Csa3G852460	-0.12573	0.59717	0.99933	-0.22829	0.50078	0.99988	-1.8102	1.7869e-09	3.7941e-08	NAC transcription factor ONAC010-like
	Csa6G092010	-0.2465	0.15527	0.99933	-0.20603	0.4363	0.99988	-0.99946	4.2065e-05	0.00040598	NAC transcription factor ONAC010-like
others	Csa3G333840	1.286	2.26e-06	0.0036722	1.119	0.0035652	0.088703	2.0019	0.0059266	0.029427	MLP-like protein 34-like
	Csa1G023060	0.16529	0.48881	0.99933	-0.44094	0.22639	0.99181	1.0652	0.0096656	0.043637	LOB domain-containing protein 41
	Csa2G225360	-0.033888	0.90287	NA	-1.2601	0.0097385	0.17962	1.8846	0.0064024	0.03131	Histone H2A variant 1
	Csa2G348180	-0.70267	0.007324	NA	0.081366	0.83484	0.99988	1.0118	0.00030566	0.0023453	pentatricopeptide repeat-containing protein At2g33680-like
	Csa2G437130	-0.23745	0.39368	0.99933	-0.043621	0.91678	0.99988	1.3403	0.0018507	0.011118	S-norcoclaurine synthase-like
	Csa3G902310	0.14462	0.60753	NA	-1.2539	0.0095188	0.1777	1.273	0.0017673	0.01069	abscisic acid receptor PYR1-like
	Csa3G730890	0.25803	0.243	0.99933	-1.06	0.00036269	0.016097	0.23778	0.20213	0.41017	abscisic acid receptor PYL4-like
	Csa4G312880	0.36524	0.18216	NA	-0.81234	0.073002	NA	2.4916	4.01e-05	0.00038988	abscisic acid receptor PYL4-like
	Csa3G354490	0.33994	0.1029	0.99933	-0.55196	0.069876	0.5859	0.85184	4.88e-06	5.89e-05	abscisic acid receptor PYL8-like
	Csa5G139540	0.13022	0.63652	NA	0.59605	0.16256	0.89424	2.2721	2.08e-09	4.39e-08	abscisic acid receptor PYL8-like
	Csa3G143530	0.11315	0.6055	0.99933	-0.12598	0.70785	0.99988	2.141	5.2e-14	1.9e-12	Chloroplastic group IIA intron splicing facilitator CRS1
	Csa3G665600	-0.1927	0.49102	0.99933	-0.91956	0.035481	0.39746	-3.5409	8.32e-12	2.39e-10	probable boron transporter 2-like
	Csa4G165850	0.47832	0.059654	0.99933	0.27788	0.46052	0.99988	0.79768	0.0049892	0.025532	DTW domain-containing protein 2
	Csa4G443120	-0.11181	0.60596	0.99933	-0.35969	0.2634	0.99988	-1.0045	0.0025916	0.014783	4,5-DOPA dioxygenase extradiol-like protein-like
	Csa5G033470	-0.33829	0.15389	0.99933	0.37787	0.21228	0.97492	-1.087	8.28e-05	0.00074379	Cysteine-rich receptor-like protein kinase 41
	Csa5G140530	-0.33605	0.12304	0.99933	0.13252	0.67325	0.99988	-1.7477	4.9e-09	9.77e-08	scarecrow-like protein 8-like
